# Supplementary material
Source: publisher figshare collection journal article supplement (https://gsapubs.figshare.com/ndownloader/files/29824848)
Supplement: Supplementary file 1 [file 29824848]

## Sheet: Table S1
Table S1. El Hierro geochemical database, including concentrations in major elements (wt.%) and trace elements (ppm). New analyses from this study are marked in bold (LDAEH samples are lavas and DAEH samples are feeder dykes; numbers at the end of the sample name denote the lava-dyke system). All literature data were carefully checked for accuracy. We provide textural information for each sample,…
ERUPTIVE STAGE	SAMPLE NAME	X (UTM)	Y (UTM)	TYPE	TEXTURE	ROCK NAME	CITATIONS	SiO2	Al2O3	Fe2O3	FeO	Fe2O3-TOT	MgO	CaO	Na2O	K2O	MnO	TiO2	P2O5	H2O	CO2	LOI	Cu	Ga	Ni	Sr	Zr	Th	Rb	Pb	Zn	Y	Cr	Co	Sc	V	Ba	Be	Nb	La	Ce	Pr	Nd	Sm	Eu	Gd	Tb	Dy	Ho
Tiñor Edifice	40615			Lava flow	Aphyric	Mugearite	[893]	51.05	16.08	8.81	2.13	11.18	3.36	7.5	5.34	2.48	0.56	1.25	1.26	0.42
Tiñor Edifice	CIHI18	210300	3076000	Lava flow	Aphyric	Tephrite/Basanite	[12930]	45.67	16.55	4.51	6.91	12.1889	4.61	9.88	4.38	1.72	0.19	3.92	0.96	0.34			30.8	27.6	23.5	1.056	426	5.95	38.6		132	39	1.59	31.1	15.8	263	410	1.89	79.8	63.27	138.1	16.88	70.29	14.27	4.38	11.47	1.54	7.92	1.65
Tiñor Edifice	CIHI10	212400	3074800	Lava flow	Aphyric	Tephrite/Basanite	[12930]	46.17	16.58	4.67	6.4	11.7822	4.8	9.71	4.19	1.65	0.19	3.55	0.93	0.77			37.8	26.5	31.7	994	412	6.37	38.7		131	34.5	19	29.7	15.6	248	389	1.55	74.8	57.78	123.6	15.07	65.35	13.03	4.05	10.67	1.44	7.46	1.34
Tiñor Edifice	M9	213154	3075917	Dyke	Aphyric	Basalt	IDOM (2008)	45.34	14.65	13.69		13.69	6.2	10.27	2.73	1.7	0.19	3.73	0.73			0.01	5.7		100.4	900.3	335.2		29.6	5.9	100.2	30.9	120.1	44.5		233.2	340.9		63.1
Tiñor Edifice	M11	213152	3075948	Dyke	Aphyric	Basalt	IDOM (2008)	46.91	16.52	12.53		12.53	3.97	10.22	3.17	1.69	0.18	3.79	0.88			0.24	15.3		36.4	944.5	410	5.4	33.5	7.7	110.9	35.4	16.5	29.2		239.4	372.6		68.3
Tiñor Edifice	M7	213309	3076316	Lava flow	Aphyric		IDOM (2008)	44.06	12.15	15.32		15.32	9.23	9.53	2.32	0.87	0.19	3.7	0.66			1.08	9.5		260.5	793.3	378.8	5	15.6	7.2	129.9	31.4	359.9	83.8		246.7	347.8		69
Tiñor Edifice	M8	213193	3076419	Lava flow	Aphyric		IDOM (2008)	42.25	13.36	13.61		13.61	7.23	10.96	1.99	1.74	0.18	4.16	0.72			1.21	20.8		109.5	873.3	376.7	3.7	32.6	6.6	94.7	32.1	151.3	38.9		243.3	298.4		55.7
Tiñor Edifice	M12	213199	3076440	Lava flow	Aphyric	Basalt	IDOM (2008)	46.66	16.45	12.52		12.52	3.47	9.66	2.94	1.74	0.17	3.85	0.98			1.63	0.1		15.9	953.6	388.2	5.8	28.1	7.4	107.9	35.4	15.4	30.2		209.9	427.9		71.8
Tiñor Edifice	M13	212154	3078024	Lava flow	Aphyric	Tephrite/Basanite	IDOM (2008)	44.09	14.24	15.14		15.14	5.74	10.63	2.78	1.75	0.19	4.41	1			0.09	3.7		81.7	1096.8	411.7	6.5	33	6.1	122.5	37.1	81	47.3		270.5	440.3		76.8
Tiñor Edifice	M13´	212154	3078024	Lava flow	Aphyric	Basalt	IDOM (2008)	45.41	14.57	14.4		14.4	4.81	9.74	2.73	1.98	0.18	4.27	0.89			0.65	17		58.2	1075.1	418.6	4.9	34.2	7.2	133.2	37.2	44.2	45.1		279.5	431.6		76
Tiñor Edifice	M14	212160	3078033	Pyroclast	Aphyric	Tephrite/Basanite	IDOM (2008)	40.19	11.65	15.08		15.08	8.99	11.8	2.29	1.42	0.21	3.56	1.33			3.42	45.8		248.5	1153.6	361.9	5.5	26.9	8.3	117.9	36.7	364.1	62.7		262.7	462.3		87.3
Tiñor Edifice	F.S.ANDRES	212126	3077213	Lava flow	Aphyric	Basaltic andesite	IDOM (2008)	43.69	11.52	10.81		10.81	6.23	5.17	1.17	0.69	0.14	2.95	0.36			17.07	175.6		91.9	489.6	311.6	2.6	26.2	7.2	67.9	27.1	107.9	41.3		157.3	230		50.9
Tiñor Edifice	M8'			Lava flow	Aphyric		IDOM (2008)	44.39	13.21	13.8		13.8	7.69	10.95	1.71	1.58	0.18	4.13	0.74			1.67	27		129.2	869.53	366.3	3.8	27.1	6.4	102.8	31.2	171.8	41.6		261.1	281.7		55
Tiñor Edifice	AG562	210230	3076061	Lava flow	Aphyric	Tephrite	Balcells & Gómez (1997)	46.12	16.1	11.69		11.69	4.92	10.03	4.35	1.6	0.18	3.83	0.93
Tiñor Edifice	47659			Lava flow	Aphyric	Benmoreite	[893]	58.2	18.86	3.02	2.65	5.96487	1.51	4.91	6.15	2.53	0.22	1	0.34	0.46
Tiñor Edifice	40575			Lava flow	Aphyric	Basalt	[893]	45.15	15.11	4.38	7.98	13.248	5.74	10.48	3.37	1.3	0.19	3.66	1.02	1.12
Tiñor Edifice	40546			Lava flow	Aphyric	Hawaiite	[893]	47	15.68	4.54	6.76	12.0522	4.94	9.39	3.91	1.81	0.21	4.23	0.92	0.2
Tiñor Edifice	41471			Lava flow	Aphyric	Tephrite	[893]	47.2	17	4.51	6.96	12.2445	4.74	8.27	5.44	1.49	0.22	2.46	1.19	0.51
Tiñor Edifice	40990			Lava flow	Aphyric	Tephrite	[893]	44.25	15.75	4.44	8.73	14.1414	6.18	10.64	3.53	1.39	0.21	3.65	0.83	0.44
Tiñor Edifice	40162			Lava flow	Aphyric	Basalt	[893]	46.1	15.72	3.83	7.74	12.4313	7.18	9.09	3.37	1.47	0.2	3.21	0.87	1.25
Tiñor Edifice	40158			Lava flow	Aphyric	Tephrite	[893]	44.3	15.29	4.67	8.1	13.6713	6.45	10.67	3.37	1.4	0.2	3.33	0.89	0.83
Tiñor Edifice	LDAEH3	211758	3077749	Lava flow	Aphyric	Basalt	This study	44.74	14.09	14.23		14.23	7.35	9.52	3.06	0.95	0.18	3.59	0.64			0.63	82		105	657			29	11	119	26	183	58	22	282	273	1	57	35	88
Tiñor Edifice	CIHI08	212600	3076900	Lava flow	Porphyritic	Picrobasalt	[12930]	44.46	12.09	2.84	10.07	14.0305	13.16	10.46	2.29	0.57	0.18	2.71	0.46	0.42			78.9	19.4	389	467	186	2.21	12.6		116	22.8	760	63.5	23.7	263	155	0.85	31.9	25.52	53.95	6.83	30.57	7.04	2.25	5.99	0.88	4.8	0.92
Tiñor Edifice	CIHI09	213900	3076800	Lava flow	Porphyritic	Tephrite/Basanite	[12930]	43.41	13.1	4.41	8.69	14.067	10.91	10.79	2.63	0.88	0.18	3.07	0.63	0.99			95.2	21.2	269	569	267	2.89	19.4		121	25.5	537	55.2	23.3	327	198	1.14	41.5	33.66	73.59	9.29	41.15	13.03	2.7	6.98	1.06	5.33	0.97
Tiñor Edifice	EEH-13	212814	3.07524e+06	Lava flow	Porphyritic	Tephrite/Basanite	Hernández-Gutiérrez (2014)	43.63	9.76	14.25		14.25	14.24	10.16	1.92	1.05	0.187	3.22	0.48			0.9
Tiñor Edifice	M15B	211632	3077935	Lava flow	Porphyritic	Basalt	IDOM (2008)	45.32	11.92	14.63		14.63	10.55	10.84	1.87	0.65	0.18	2.88	0.42			0.05	47.1		353.7	508.4	194.1	1.4	12.8	6.5	97.3	24.9	540.9	75		215.6	187.3		31.4
Tiñor Edifice	40564			Lava Flow	Porphyritic	Basanite	[893]	42.2	9.86	3.11	9.94	14.1561	14.88	12.05	2.17	0.87	0.31	3.09	0.53	0.58
Tiñor Edifice	40159			Lava flow	Porphyritic	Basanite	[893]	41.4	12.75	5.12	9.3	15.4548	9.53	10.74	2.81	1.35	0.2	4.14	1.03	1.48
Tiñor Edifice	TIMPILL2	212840	3075241	Pillow lava	Porphyritic	Basalt	This study	45.94	15.2	14.403		14.403	4.279	10.007	3.409	1.112	0.198	3.794	0.729			0.93	109.7	25.2	30.8	570.9	318.3	5.9	25.3		129.4	37.6		31.1	18.6	280.2	296.7		65.2	78.4	90.1		52.1
Tiñor Edifice	DAEH3	212631	3078448	Dyke	Porphyritic	Foidite	This study	39.58	10.74	14.907		14.907	12.04	13.162	3.195	0.548	0.218	3.451	1.503			0.66	52.7	19.6	275	1245	352.7	10.1	16.2		142.3	37.5	421.6	59.7	20.6	303.4	547.6		96.7	137.6	204.3		97.9	12.9
Tiñor Edifice	TIMBAS3	212840	3075241	Lava flow	Porphyritic	Picrobasalt	This study	43.52	8.85	14.806		14.806	15.577	10.833	1.803	0.718	0.187	3.083	0.428			0.19	63	16.6	363.9	477.6	234.4	5.8	18.4		99.5	19.9	697.8	72.8	26.9	263.4	242		41.5	61.5	76		47.6
Tiñor Edifice	40578			Lava flow	Unknown	Basanite	[893]	44.65	14.46	7.35	5.75	13.74	8.47	9.25	3.5	1.44	0.21	3.41	0.93	0.44
Tiñor Edifice	40476			Dyke	Unknown	Foidite	Balcells & Gómez (1997)	39.51	11.22	4.03	10.56	15.765	11.09	12.06	4.8	1.01	0.21	4.53	0.74	0.38
Tiñor Edifice	40563			Lava flow	Unknown	Hawaiite	Balcells & Gómez (1997)	46.58	16.65	2.38	8.94	12.3148	4.27	9.9	4.24	1.4	0.19	3.63	1.02	0.68
Tiñor Edifice	41000			Dyke	Unknown	Basalt	[893]	46.9	14.78	5.34	8.92	15.2526	6.65	10.37	3.01	0.57	0.18	2.47	0.38	0.58
Tiñor Edifice	40152			Dyke	Unknown	Hawaiite	[893]	46.7	16.7	5.09	6.12	11.891	5.14	9.11	4.04	1.4	0.2	3.76	0.87	0.84
Tiñor Edifice	40561			Dyke	Unknown	Tephrite	[893]	46.37	16.17	5.09	6.03	11.791	4.88	10.18	4.15	1.77	0.18	3.47	0.9	0.43
Tiñor Edifice	40572			Dyke	Unknown	Basanite	[893]	42	10.18	5.9	7.92	14.7013	12.2	13.02	2.62	0.87	0.25	3.2	0.9	0.37
Tiñor Edifice	M10	213159	3075929	Dyke	Unknown	Basalt	IDOM (2008)	46.51	14.11	13.89		13.89	6.2	10.56	2.48	0.94	0.18	3.06	0.55			0.01	20.7		148.5	626.3	266.6	2.3	15.8	6.1	104.7	29.5	212.6	50		308	239.9		43
Tiñor Edifice	M17	212155	3077977	Dyke	Unknown	Basalt	IDOM (2008)	46.51	14.11	13.89		13.89	6.2	10.56	2.48	0.94	0.18	3.06	0.55			0.04	15.5		53.9	1084.8	416	4.6	32.9	6.8	127.1	37.1	32.4	39.3		262.1	17760.5		75.9
Tiñor Edifice	M1	213219	3075933	Pyroclast	Unknown		IDOM (2008)	44.6	14.14	14.83		14.83	4.86	9.96	3.78	1.69	0.2	4.2	0.83			0.54	36.4		79.7	990.3	440.8	5.6	45.7	9.4	143	36.2	99.9	53.6		261.3	404.1		82.1
Tiñor Edifice	M2			Pyroclast	Unknown		IDOM (2008)	45.85	14.44	13.95		13.95	5.17	9.37	2.65	1.96	0.19	3.94	0.83			0.96	27.1		63.2	995	449.2	5.8	40.7	8.3	146.4	37.4	71.7	50.1		256.5	405.1		83.4
Tiñor Edifice	M3´	213344	3076083	Pyroclast	Unknown		IDOM (2008)	40.89	12.52	13.1		13.1	6.52	9.6	1.6	1.25	0.17	3.79	0.83			8.83	61.7		99.8	1883.7	404	5.4	26.2	7.2	127.7	33.8	11.8	46.3		211.5	394.4		76.2
Tiñor Edifice	M4	213335	3076069	Pyroclast	Unknown		IDOM (2008)	43.52	13.04	13.09		13.09	6.77	9.61	1.95	1.42	0.18	3.49	0.71			5.7	42.8		130.2	1291.7	455.7	6.8	30.3	8.9	128.1	33.4	203	51.7		212.2	428		77.8
Tiñor Edifice	M5	213213	3076442	Pyroclast	Unknown		IDOM (2008)	43.65	13.72	15.3		15.3	5.11	12.25	2.39	1.56	0.19	4.69	0.87			0.01	85.6		53.3	1097.8	520.8	6.2	32.2	6.9	108.2	32.2	29.2	39.6		329.3	307.8		95.7
Tiñor Edifice	M6	213342	3076356	Pyroclast	Unknown		IDOM (2008)	44.74	13.65	14.89		14.89	6.37	9.69	2.76	1.6	0.19	4.1	0.79			0.43	12.9		117.6	914.4	424	5.9	33.7	6.7	135.8	35.2	138.2	59.7		270.4	393.1		79.5
Tiñor Edifice	M16	211635	3077935	Lava flow	Unknown	Basalt	IDOM (2008)	45.52	11.77	14.54		14.54	10.62	10.19	1.45	0.55	0.18	2.8	0.28			1.24	57.9		405.2	498.7	256.8	0.6	8.1	5.4	115.2	22.5	601.7	67		211.8	191.2		30.1
Tiñor Edifice	COLADA DESAGÜE			Lava flow	Unknown		IDOM (2008)	44.69	14.44	14.73		14.73	4.61	10.01	3.12	1.88	0.18	4.42	0.93			0.56	22.4		47.7	1066.2	311.6	4.9	25.6	9.2	126.8	38	38.4	49		195.6	415.8		75.9
Tiñor Edifice	MA	213607	3076596	Pyroclast	Unknown		IDOM (2008)	46.69	16.41	12.12		12.12	3.61	9.16	2.75	1.44	0.18	3.39	1.01			3.19	49.5		290.1	655	256.8	1.6	15.9	6.7	115.2	27.7	351.9	60.6		298.6	216.9		39.7
Tiñor Edifice	MB	213625	3076480	Pyroclast	Unknown		IDOM (2008)	43.69	12.18	15.11		15.11	9.28	11.03	1.85	0.86	0.19	3.31	0.62			1.26	4.8		28.6	1002.9	456.6	5.7	36.1	8.1	118.8	34.7	39.1	34		219.3	383		80.3
Tiñor Edifice	41468			Lava flow	Unknown	Tephrite	[877]; [893]	42.6	14.4	4.77	9.34	15.15	6.85	10.66	3.99	1.4	0.18	4.46	1.07	0.27			43	17	42	600	284	20	38	8	85	25
Tiñor Edifice	47596			Lava flow	Unknown	Basanite	[877]; [893]	42	12.74	4.37	10.7	16.26	8.97	9.12	3.83	1.49	0.19	4.73	1.04	0.5			54	16	224	387	177	20	32	7	83	19
Tiñor Edifice	41225			Lava flow	Unknown	Basanite	[893]	40.4	12.24	7.59	6.44	14.75	11.21	12.05	2.83	1.01	0.21	3.47	0.88	1.63
Tiñor Edifice	47599			Lava flow	Unknown	Foidite	[877]; [893]	40.8	13.13	4.76	9.37	15.17	9.65	11.64	3.42	1.17	0.19	4.29	1.1	0.6			43	17	180	531	213	17	35	10	82	22
Tiñor Edifice	47603			Lava flow	Unknown	Basanite	[893]	45.66	16.96	3.4	8.74	13.1125	5.76	8.56	4.16	1.52	0.19	3.61	0.83	0.67
Tiñor Edifice	JMDD EH 03	274736	175527	Lava flow	Porphyritic	Basanite	[15056]	42.7363	11.4627	14.8583		14.8583	12.8189	10.9302	2.37089	0.758485	0.20896	3.46592	0.540483			-0.460117	58.4713	20.0858	257.371	660.939	269.56	3.38602	17.7224	1.98361	124.197	28.5754	619.1	73.3619	36.7364	353.378	235.382		52.5301	35.9682	76.2892	10.1542	43.8525	8.90892	2.6959	7.90169	1.10651	5.56482	1.00434
Tiñor Edifice	JMDD EH 04	274747	175515	Lava flow	Porphyritic	Alkali Basalt	[15056]	41.2523	11.9428	15.7396		15.7396	10.4763	11.079	2.67181	0.863818	0.203901	6.04673	0.989373			-0.447611	97.8744	23.2575	200.856	913.583	328.096	4.66193	21.9984	2.62045	143.802	34.2001	394.03	61.8121	29.9349	376.18	315.949		64.8973	49.6414	103.852	14.0118	61.2772	12.5889	3.79445	10.9927	1.46749	7.09456	1.21306
Tiñor Edifice	JMDD EH 05	274748	175515	Lava flow	Porphyritic	Alkali Basalt	[15056]	40.9864	11.5831	15.6878		15.6878	10.9724	11.1927	2.78315	0.834946	0.216245	5.25595	1.0622			-0.113895	99.4237	22.2357	225.561	974.969	335.539	5.27524	20.4581	2.53378	142.539	36.087	440.039	65.002	29.3452	348.84	345.758		71.7905	59.7387	116.639	16.2888	70.0874	13.8742	4.09032	11.715	1.55107	7.52335	1.28676
Tiñor Edifice	JMDD EH 06	274607	175517	Lava flow	Aphyric	Hawaiite	[15056]	47.5048	16.7317	12.0012		12.0012	3.83038	9.50095	3.64036	1.53215	0.183018	4.75048	0.885089			-0.0100748	95.2762	25.6424	28.1019	987.573	423.152	7.69862	38.381	3.60716	131.225	39.7599	7.70863	30.5613	16.2387	249.364	418.042		97.8047	68.8363	137.637	17.3594	71.1087	13.4301	4.02191	11.4128	1.59796	7.91875	1.40784
Tiñor Edifice	JMDD EH 07	274607	175517	Lava flow	Porphyritic	Ankaramite	[15056]	43.7115	11.1788	13.5735		13.57	11.7352	11.0794	2.13639	1.02447	0.202709	3.29898	0.642904			0.628	98.1581	19.4331	238.569	826.398	344.692	7.95116	24.6911	3.32778	119.281	28.3974	651.369	63.4337	34.8166	311.634	304.215		154.317	77.5147	157.287	18.06	65.2687	10.384	2.95067	8.41016	1.12789	5.58945	0.975873
Tiñor Edifice	JMDD EH 08	274604	175510	Lava flow	Porphyritic	Basanite	[15056]	43.1055	12.9356	14.2591		14.2591	9.27386	10.4679	2.78614	1.17217	0.207965	4.64688	0.769173			0.495635	66.1635	22.8674	154.943	869.505	421.061	4.51973	28.9261	2.73966	134.695	34.414	333.502	55.6937	30.4584	332.622	290.322		71.6352	46.7315	102.495	14.0518	61.1149	12.0107	3.55775	10.1248	1.37507	6.89632	1.20926
El Golfo-Las Playas Edifice	CIHI05	204800	3075800	Lava flow	Porphyritic	Tephrite/Basanite	[12930]	41.45	13.09	4.65	9.26	14.9404	8.31	11.01	2.98	1.16	0.19	4.25	1.04	2.27			122	26.5	147	952	392	5.76	27.9		156	35.3	242	49	21	316	336	2	72	61	130	16	68	14	4	11	1	8	2
El Golfo-Las Playas Edifice	39864			Dyke	Aphyric	Tephrite/Basanite	[893]	44.6	15.68	4.23	8.39	13.5536	7.2	9.24	3.96	1.44	0.22	3.97	1.06	0.59
El Golfo-Las Playas Edifice	AG561	205950	3077856	Lava flow	Aphyric	Benmoreite	Balcells & Gómez (1997)	56.95	18.95	5.85		5.85	1.29	5.36	7.28	2.48	0.26	1.18	0.32
El Golfo-Las Playas Edifice	40668			Dyke	Aphyric	Benmoreite	[893]	54	18.97	3.78	2.47	6.52485	2.24	5.95	6.58	2.53	0.28	1.3	0.46	0.77
El Golfo-Las Playas Edifice	47566			Dyke	Aphyric	Trachyte	[893]	58.25	18.81	3.42	0.81	4.32013	1.01	4.49	8.57	2.75	0.25	0.73	0.18	0.6
El Golfo-Las Playas Edifice	41319			Dyke	Aphyric	Tephrite	[893]	47.5	17.81	2.86	6.76	10.3722	4.88	8.78	4.8	1.99	0.22	2.84	1.14	0.63
El Golfo-Las Playas Edifice	41373			Dyke	Aphyric	Hawaiite	[893]	48.8	17.59	3.32	6.86	10.94	5.75	6.31	5.07	1.66	0.21	2.8	1.29	0.28
El Golfo-Las Playas Edifice	AG506	204901	3073950	Lava flow	Aphyric	Hawaiite	Balcells & Gómez (1997)	49.7	16.96	10.12		10.12	3.98	8.5	4.78	1.72	0.18	2.77	1.23
El Golfo-Las Playas Edifice	41136	206030*	3073914*	Dyke	Aphyric	Hawaiite	[893]	49.9	17.08	3.74	6.44	10.8966	5.54	6.03	4.71	1.59	0.21	2.56	1.29	0.83
El Golfo-Las Playas Edifice	CIHI02	206400	3078400	Lava flow	Aphyric	Benmoreite	[12930]	55.61	19.02	3.53	2.34	6.13038	1.31	5.65	7.13	2.39	0.28	1.24	0.4	0.49			10.3	32.9	6.32	2099	857	14.9	68.4		186	58.5	1.97	3.71	5.9	34.6	801	4.95	172	150.7	305.2	36.23	139	24.53	6.91	17.02	2.3	11.99	2.41
El Golfo-Las Playas Edifice	CIHI03	206400	3078300	Lava flow	Aphyric	Tephrite/Basanite	[12930]	44.3	16.79	5.15	7.08	13.0178	4.98	9.85	4.66	1.32	0.2	3.83	1.02	0.45			18.5	25.2	8.47	1124	334	5.14	27.9		140	38.5	1.51	29.7	14.8	230	416	1.33	82.5	64.7	136	16.48	68.3	13.79	4.17	10.09	1.53	8.06	1.55
El Golfo-Las Playas Edifice	CIHI04	205900	3077500	Lava flow	Aphyric	Hawaiite	[12930]	47.27	16.3	6.4	5.33	12.3231	4.76	8.67	4.37	1.25	0.18	3.2	0.85	1.09			38.2	27.5	32.2	780	351	4.93	27.5		138	36.8	33.6	27.8	15	201	346	1.6	71.9	52.99	114.2	14.16	58.26	12.54	3.77	10.14	1.32	7.29	1.49
El Golfo-Las Playas Edifice	39882			Lava flow	Aphyric	Tephrite/Basanite	[893]	48.8	15.88	4.42	6.23	11.3432	6.72	7.08	4.82	1.67	0.38	2.56	1.3	0.24
El Golfo-Las Playas Edifice	39881			Lava flow	Aphyric	Foidite	[893]	48.1	16.57	2.25	8.56	11.7625	6.11	7.37	4.58	1.58	0.24	2.71	1.3	0.41
El Golfo-Las Playas Edifice	39880			Lava flow	Aphyric	Basalt	[893]	61	18.1	1.3	3.08	4.72272	1.65	2.91	6.9	3.03	0.2	0.93	0.22	0.59
El Golfo-Las Playas Edifice	41460			Lava flow	Aphyric	Trachyte	[893]	58.85	18.6	4.21	0.27	4.51004	0.91	4.5	7.44	2.91	0.24	1	0.19	0.51
El Golfo-Las Playas Edifice	41457			Lava flow	Aphyric	Benmoreite	[893]	55.9	19.2	3.11	2.39	5.76594	1.22	5.94	7.17	2.58	0.3	1.13	0.32	0.17
El Golfo-Las Playas Edifice	47591	204902*	3081199*	Lava flow	Aphyric	Benmoreite	[893]	56.5	18.6	3.69	2.14	6.06813	1.21	5.47	7.12	2.89	0.27	1.16	0.3	0.39
El Golfo-Las Playas Edifice	41456			Lava flow	Aphyric	Benmoreite	[893]	55.9	18.71	5.46	0.21	5.69337	1.22	5.94	7.66	2.62	0.28	1.1	0.33	0.41
El Golfo-Las Playas Edifice	47573			Lava flow	Aphyric	Benmoreite	[893]	54.7	18.17	4.7	2.45	7.42262	2.01	6.59	6.2	2.43	0.28	1.69	0.45	0.44
El Golfo-Las Playas Edifice	47588	204893*	3081192*	Lava flow	Aphyric	Benmoreite	[893]	55.65	18.86	3.75	1.95	5.91698	1.21	5.33	7.47	2.94	0.28	1.16	0.3	0.54
El Golfo-Las Playas Edifice	40128			Lava flow	Aphyric	Tephrite	[893]	44.8	14.66	5.14	7.57	13.5523	6.9	10.02	3.77	1.85	0.18	3.81	0.96	0.39
El Golfo-Las Playas Edifice	41306	205325*	3072401*	Lava flow	Aphyric	Trachyte	[893]	62.36	17.97	2.72	0.4	3.16451	0.81	2.24	7.82	3.55	0.17	0.9	0.05	0.58
El Golfo-Las Playas Edifice	41390			Lava flow	Aphyric	Hawaiite	[893]	47.9	16.4	3.73	7.25	11.7867	5.8	7.79	4.31	1.35	0.2	3.08	0.91	0.72
El Golfo-Las Playas Edifice	AG547	207204	3066343	Lava flow	Porphyritic	Tephrite/Basanite	Balcells & Gómez (1997)	44.08	14.14	13.88		13.88	7.11	10.25	3.88	1.15	0.18	4.28	0.85
El Golfo-Las Playas Edifice	AG548	207204	3066343	Lava flow	Porphyritic	Tephrite/Basanite	Balcells & Gómez (1997)	43.09	14.09	13.89		13.89	6.99	10.2	3.99	1.31	0.18	4.5	1.16
El Golfo-Las Playas Edifice	39861	207200	3066246	Lava flow	Porphyritic	Picrobasalt	Balcells & Gómez (1997)	43.6	13.94	3.72	10.39	15.2661	9.23	9.31	3.22	1.13	0.2	3.72	0.77	0.57
El Golfo-Las Playas Edifice	41277			Lava flow	Porphyritic	Picrobasalt	[893]	41.6	7.65	5.22	9.64	15.93	18.25	10.23	1.62	0.67	0.19	3.51	0.5	0.58
El Golfo-Las Playas Edifice	39872			Dyke	Unknown	Basanite	[893]	42.7	13.13	5.81	8.5	15.23	9.57	12.1	2.75	0.72	0.19	3.49	0.52	0.36
El Golfo-Las Playas Edifice	40130			Lava flow	Unknown	Tephrite	Balcells & Gómez (1997)	46.81	16.95	6.08	5.05	11.69	5.77	8.47	4.49	1.68	0.2	2.96	1	0.39
El Golfo-Las Playas Edifice	41372			Dyke	Unknown	Potassic trachybasalt	[893]	46	15.38	4.57	6.92	12.26	6.31	9.49	3.72	1.81	0.23	3.62	1.08	0.43
El Golfo-Las Playas Edifice	40134			Dyke	Unknown	Picrobasalt	[893]	42.6	9.05	3.05	11.44	15.76	16.7	10.4	1.94	0.65	0.21	3.16	0.52	0.32
El Golfo-Las Playas Edifice	JMDD EH 09	274752	175852	Lava flow	Aphyric	Trachyte	[15056]	57.5522	18.8907	5.88023		5.88023	1.06004	4.99019	7.18028	2.25909	0.286011	1.26005	0.319012			0	6.21154	32.5499	1.21729	2009.84	975.224	17.1833	73.0321	10.4831	163.034	68.2403	1.37513	3.59112	2.97773	31.9577	838.024		217.947	150.866	294.075	36.6225	140.534	23.2228	6.64356	17.3256	2.43772	12.2817	2.24014
El Golfo-Las Playas Edifice	JMDD EH 14	274749	175856	Lava flow	Porphyritic	Alkali Basalt	[15056]	42.6676	13.3839	15.1551		15.1551	8.03037	10.204	3.61266	1.13411	0.222395	5.60516	0.915744			-0.633048	65.2543	24.221	102.9	1064.85	359.372	5.89467	27.2541	3.54279	145.837	37.6571	235.817	51.9679	26.1231	338.47	393.682		87.0118	56.7175	116.285	15.4578	65.6533	13.0685	3.91632	11.143	1.52304	7.6541	1.32755
El Golfo-Las Playas Edifice	JMDD EH 15	274738	175900	Lava flow	Porphyritic	Ankaramite	[15056]	42.2653	8.9444	15.8633		15.8633	17.5679	9.20511	1.72471	0.484321	0.193528	3.01823	0.295807			-0.27162	108.137	16.4906	490.247	451.973	169.77	1.9415	11.5876	1.31579	122.509	21.7654	1067.11	95.3872	36.7474	307.069	145.031		35.4476	20.0604	42.6152	5.8912	26.2938	5.84234	1.85628	5.64272	0.818158	4.15883	0.758455
El Golfo-Las Playas Edifice	JMDD EH 16	274727	175912	Lava flow	Porphyritic	Basanite	[15056]	43.1067	10.3624	14.5453		14.5453	11.7001	12.4189	2.41589	0.814615	0.20565	4.03315	0.751722			0.170565	123.395	21.0393	222.468	863.112	328.363	3.92806	22.4515	2.56413	131.132	30.4505	696.578	63.61	36.4269	349.151	274.77		64.2745	41.3649	89.9792	12.4827	55.0876	11.4879	3.43682	9.71983	1.33081	6.41931	1.09418
El Golfo-Las Playas Edifice	41323			Lava flow	Porphyritic	Basanite	[893]	41	12.24	5.07	9.6	15.74	11.69	11.49	2.29	0.99	0.2	3.46	0.75	1.37
El Golfo-Las Playas Edifice	40653			Lava flow	Aphyric	Trachyte	[893]	60.46	19.46	2.1	1.11	3.33351	1.02	2.26	7.76	3.52	0.18	0.72	0.15	1.02
El Golfo-Las Playas Edifice	40651			Lava flow	Aphyric	Trachyte	[893]	59.85	20.36	2.19	1.25	3.57909	0.87	2.55	7.54	3.6	0.18	0.71	0.18	0.84
El Golfo-Las Playas Edifice	40592			Lava flow	Aphyric	Benmoreite	[893]	55.35	17.57	4.22	3.28	7.86498	3.25	5.38	5.61	2.89	0.17	0.97	0.72	0.54
El Golfo-Las Playas Edifice	MMPum	200471	3070783	Pumice	Aphyric	Trachyte	This study	61.59	19.26		3.5	3.88946	0.66	2.5	7.36	3.95	0.186	0.819	0.172
El Golfo-Las Playas Edifice	LT-16			Lava flow	Unknown	Foidite-Dunite	Aparicio et al. (2003)	38	10.74	5.82	7.89	14.59	13.01	15.09	3.32	0.87	0.22	3.46	1.31	0.1			73	20	239	1309	395	6.8	26	5	115	42	390	56	27	309	503		106.2	111.2	218.6	26.67	107.4	19.6	5.88	14.37	1.93	9.35	1.61
Rift Volcanism	AG564	213697	3076410	Lava flow	Porphyritic	Hawaiite	Balcells & Gómez (1997)	47.38	14.01	11.99		11.99	7.67	8.74	4.18	1.75	0.17	3.23	0.74
Rift Volcanism	RB4	203796	3063628	Lava flow	Porphyritic	Basanite	Balcells & Gómez (1997)	41.78	10.68	14.16		14.16	11.16	11.83	3.8	1.14	0.17	4.13	0.93
Rift Volcanism	AG563	214348	3078672	Lava flow	Porphyritic	Tephrite	Balcells & Gómez (1997)	43.62	12.96	13.4		13.4	8.78	10.74	3.83	1.25	0.18	4.13	0.92
Rift Volcanism	RB50	198604	3070742	Lava flow	Porphyritic	Tephrite	Balcells & Gómez (1997)	45.39	15.11	12.46		12.46	5.71	9.88	4.41	1.8	0.17	3.97	0.94
Rift Volcanism	RB37	189891	3070534	Lava flow	Porphyritic	Tephrite	Balcells & Gómez (1997)	43.76	14.17	13.55		13.55	6.56	10.83	3.92	1.44	0.17	4.65	0.83
Rift Volcanism	CIHI15	208100	3070100	Lava flow	Aphyric	Tephrite/Basanite	[12930]	44.16	15.21	4.81	7.78	13.46	5.47	10.07	4.52	1.76	0.2	3.88	1.22				48.2	30.4	39.5	1219	541	6.89	45.5		164	43.4	40.3	34.7	16	282	450	3.12	92.8	76.26	162.6	20.48	83.5	16.64	5.14	12.73	1.86	9.25	1.74
Rift Volcanism	CIHI01	206400	3078500	Lava flow	Aphyric	Tephrite/Basanite	[12930]	45.3	16.03	3.48	8.35	12.76	5.07	9.76	4.51	1.61	0.2	3.65	1.04				44.3	27.5	35.8	1070	475	6.19	36.7		151	39.9	63.1	30.4	14.8	248	394	2.27	85.5	69.01	144.4	17.87	74.57	14.57	4.5	11.28	1.64	8.42	1.61
Rift Volcanism	CIHI11	203200	3073200	Lava flow	Aphyric	Tephrite/Basanite	[12930]	44.64	16.37	6.48	4.43	11.4	4.77	9.94	5.01	2.02	0.18	4	1.2				39.9	29.2	27.5	1369	505	9.07	50.5		138	42.2	6.75	28.4	13.8	277	549	1.67	108	84.98	170.8	20.15	81.82	16.22	5.09	12.83	1.76	8.81	1.65
Rift Volcanism	RB17	200695	3066138	Lava flow	Aphyric	Tephrite	Balcells & Gómez (1997)	44.62	14.96	12.46		12.46	5.31	10.22	5.04	1.81	0.18	4.05	1.14
Rift Volcanism	AG545	206441	3064290	Dyke/Sill	Aphyric	Hawaiite	Balcells & Gómez (1997)	49.19	16.42	11.02		11.02	4.28	8.01	5.34	1.59	0.21	2.73	1.21
Rift Volcanism	AG509	205814	3065437	Lava flow	Aphyric	Tephrite	Balcells & Gómez (1997)	42.77	14.11	13.99		13.99	6.48	11.54	3.72	1.25	0.17	4.98	0.98
Rift Volcanism	47636	200200*	3070906*	Pumice	Aphyric	Trachyte	[877]; [893]	58.1	18.48	2.58	1.29	4.01	0.88	2.52	8.63	3.69	0.11	0.64	0.18	2.9			8	22	27	688	834	30	120	21	93	31
Rift Volcanism	40826			Lava flow	Aphyric	Tephrite	[877]; [893]	47.4	16.57	3.81	7.28	11.9	5.37	9.14	4.45	2	0.21	1.91	1.16	0.36			18	18	27	678	289	14	38	8	85	27
Rift Volcanism	40928			Lava flow	Aphyric	Tephrite	[893]	46.65	16.14	3.03	8.02	11.94	4.27	11.89	4.76	1.73	0.21	1.85	1.01	0.56
Rift Volcanism	40871	202884*	3069467*	Lava flow	Aphyric	Benmoreite	[893]	58.8	19.18	2.37	1.42	3.95	1.1	4.21	7.11	2.99	0.23	1.04	0.21	0.59
Rift Volcanism	47635	200222*	3070722*	Lava flow	Aphyric	Trachyte	[893]	58.2	18.48	2.74	1.42	4.32	0.81	2.67	7.7	3.85	0.2	0.84	0.16	2.88					80.43	0	53.64
Rift Volcanism	RB30	203551	3069558	Lava flow	Aphyric	Trachyte	Balcells & Gómez (1997)	59.73	18.96	4.63		4.63	0.9	4.16	7.12	2.95	0.22	0.89	0.21
Rift Volcanism	RB7	201501	3064984	Lava flow	Aphyric	Tephrite	Balcells & Gómez (1997)	44	14.01	13.74		13.74	5.89	10.22	4.93	1.64	0.21	4.02	1.33
Rift Volcanism	47647	202781*	3069435*	Pumice	Aphyric	Benmoreite	[877]; [893]	58.75	18.86	3.14	1.78	5.12	1.21	4.34	6.58	3.15	0.22	0.97	0.2	0.59			9	21	12	998	797	23	71	12	96	38
Rift Volcanism	AG555	208631	3077793	Lava flow	Aphyric	Tephrite	Balcells & Gómez (1997)	47.21	16.84	10.81		10.81	4.43	9.5	4.69	1.7	0.18	3.42	1.02
Rift Volcanism	39929	212619*	30812883*	Lava flow	Aphyric	Tephrite	[877]; [893]	43.4	15.25	4.44	8.82	14.24	5.97	10.93	4.04	1.56	0.21	3.95	1.41	0.16			21	17	22	417	157	14	30	7	83	21
Rift Volcanism	40873			Lava flow	Aphyric	Tephrite	[893]	45.1	14.73	5.14	7.87	13.89	6.21	10.77	4.31	2.07	0.2	2.18	0.99	0.64
Rift Volcanism	40211			Lava flow	Aphyric	Hawaiite	[893]	48.9	17.75	4.07	6.5	11.29	4.88	8.49	4.75	1.73	0.21	1.55	1	0.41
Rift Volcanism	AG501	206678	3074131	Lava flow	Aphyric	Mugearite	Balcells & Gómez (1997)	50.06	17.13	10.2		10.2	3.82	7.98	4.99	1.79	0.19	2.56	1.23
Rift Volcanism	AG515	204974	3069812	Lava flow	Aphyric	Tephrite	Balcells & Gómez (1997)	43.61	14.58	13.36		13.36	6.02	10.67	4.29	1.58	0.18	4.51	1.28
Rift Volcanism	EEH-02	209660	3082906	Lava flow	Aphyric	Tephrite/Basanite	Hernández-Gutiérrez (2014)	44.11	15.02	14.9		14.9	6.31	9.47	4.01	1.26	0.204	4.53	0.8			-0.71
Rift Volcanism	EEH-010	205151	3078169	Lava flow	Porphyritic	Tephrite/Basanite	Hernández-Gutiérrez (2014)	41.69	11.38	16.39		16.39	10.11	11.35	2.53	1.14	0.189	5.23	0.73			-0.21
Rift Volcanism	39860			Lava flow	Aphyric	Tephrite	Balcells & Gómez (1997)	42.71	13.85	4.49	9.73	15.3027	7.85	12.65	3.76	0.53	0.2	3.21	0.41	0.64
Rift Volcanism	41341			Lava flow	Aphyric	Phonotephrite	[877]; [893]	50	18	3.55	5.25	9.38	3.62	6.86	5.59	3.32	0.2	2.47	0.79	0.5			13	19	11	712	405	25	53	12	86	28
Rift Volcanism	DAEH2	206475	3080874	Dyke	Porphyritic	Tephrite/Basanite	This study	42.55	13.17	15.196		15.196	6.334	11.167	3.781	1.805	0.194	4.837	0.929			0.04	59	27.9	56.3	1103.7	480.4	9.3	41.8	1.4	134.4	37.9	35.9	37.8	18	360.1	557.8		93.6	119	154.6		82.8	20.1
Rift Volcanism	DAEH4	189928	3073792	Dyke	Aphyric	Tephrite/Basanite	This study	44.95	14.82	13.363		13.363	4.884	9.861	4.651	1.913	0.2	3.849	1.087			0.42	36.4	28.6	24.3	1166.9	484.8	9.8	50.8	3.3	133.3	40.6		33.7	10.6	280.4	612.3		106.8	124.4	172.3		87.3	18.6
Rift Volcanism	LDAEH2	206505	3080797	Lava flow	Aphyric	Tephrite/Basanite	This study	41.7	13.52	14.81		14.81	6.17	10.08	3.91	1.93	0.192	4.75	0.88			0.62	66.8	28	45.7	1100.9	489.3	9.4	42.9	3.8	142	37.7	8.3	45.9	0	376.3	568.3		96.8	120.7	170.5		92.4	9.9
Rift Volcanism	EHVD1	189405	3073025	Lava flow	Aphyric	Tephrite/Basanite	This study	45.66	16.32	11.33		11.33	4.24	8.99	4.47	2.01	0.189	3.41	1.23			0.65	17.9	29.9	13.1	1304.4	493.1	8.4	45.6	3.2	131.4	42.7		23	0	258.6	597.2		103.1	122.2	191.1		100.4	18.8
Rift Volcanism	DAEH1	206099	3061052	Dyke	Aphyric	Tephrite/Basanite	This study	43.58	13.57	14.983		14.983	7.033	13.11	2.677	0.648	0.179	3.573	0.477			0.17	101.5	23	91.5	587.1	222	3	16	1.2	101.2	25.4	40.4	43	25.3	361.4	292.7		53.7	66.4	78.4		46.1
Rift Volcanism	DAEH6	207463	3077995	Dyke	Porphyritic	Tephrite/Basanite	This study	43.78	13.03	13.99		13.99	9.17	10.76	3.34	0.88	0.179	3.35	0.59			0.24	112	23.1	201.1	695.2	262.1	6.2	18.1	3.8	109.7	25.1	382.8	56.3	0	326.4	391.5		73.6	73.5	96.1		48.5
Rift Volcanism	40829	201833*	3069961*	Lava flow	Porphyritic	Basanite	[877]; [893]	41.5	10.58	3.65	9.8	14.54	14	11.62	3.05	1.3	0.19	3.4	0.8	0.35			53	16	224	390	179	18	31	10	83	20
Rift Volcanism	40847			Lava flow	Porphyritic	Basanite	[877]; [893]	41.6	10.71	3	10.48	14.65	13.27	11.68	2.91	1.2	0.18	3.39	0.8	0.46			83	17	296	438	179	22	34	9	82	21
Rift Volcanism	AG556	209044	3078703	Lava flow	Porphyritic	Basanite	Balcells & Gómez (1997)	44.12	12.6	13.26		13.26	9.91	11.56	3.56	0.8	0.18	3.23	0.64
Rift Volcanism	CIHI30	189404	3074274	Lava flow	Porphyritic	Picrobasalt/Basanite	[12930]	41.33	9.82	5.7	9.01	15.71	14.21	11.42	2.04	0.84	0.17	4.07	0.52	0.56			86.6	21.5	365	522	241	2.74	19.8		127	22.2	733	69.7	27.6	365	197	0.96	37.9	29.03	64.81	8.91	40.88	8.57	2.68	7.13	0.99	5.09	0.91
Rift Volcanism	CIHI13	211500	3071500	Lava flow	Porphyritic	Basanite	[12930]	41.19	11.03	4.66	9.51	15.23	12	11.89	2.81	1.02	0.17	4.26	0.68	0.43			130	23	307	734	281	3.23	21.5		133	25.5	571	64.3	25.2	365	258	0.94	49.6	39.7	88.29	11.14	46.73	9.92	3.11	7.79	1.14	5.71	0.99
Rift Volcanism	RB15	202124	3063434	Lava flow	Porphyritic	Basanite	Balcells & Gómez (1997)	42.53	10.15	14.14		14.14	12.8	11.29	2.91	0.92	0.17	4.16	0.63
Rift Volcanism	40831			Lava flow	Porphyritic	Basanite	[877]; [893]	42.4	14.44	3.13	10.21	14.48	12.91	11.61	2.59	1.01	0.18	4.24	0.74	0.4			75	16	283	422	173	15	30	9	83	19
Rift Volcanism	40912			Lava flow	Porphyritic	Basanite	[893]	41.6	10.58	3.56	10.25	14.95	12.19	12.2	3.23	1.11	0.19	3.61	0.8	0.43
Rift Volcanism	40949			Lava flow	Porphyritic	Basanite	[893]	41.6	10.83	3.44	10.13	14.7	13.57	11.42	2.97	1.32	0.21	3.62	0.84	0.2
Rift Volcanism	40201			Lava flow	Porphyritic	Basanite	[893]	41.2	10.02	4.19	10.5	15.86	15.02	11.07	2.4	1	0.18	3.28	0.56	0.4
Rift Volcanism	AG521	195393	3069788	Lava flow	Porphyritic	Tephrite	Balcells & Gómez (1997)	42.81	12.25	14.45		14.45	8.89	11.7	3.34	1.25	0.18	4.32	0.79
Rift Volcanism	AG522	198912	3069552	Lava flow	Porphyritic	Basanite	Balcells & Gómez (1997)	43.15	11.01	13.24		13.24	13.71	10.67	3.05	0.97	0.18	3.23	0.74
Rift Volcanism	RB35	190856	3070623	Lava flow	Porphyritic	Tephrite	Balcells & Gómez (1997)	41.56	12.95	14.79		14.79	8.31	11.59	3.38	1.19	0.18	4.83	1.06
Rift Volcanism	39863			Lava flow	Porphyritic	Basanite	Balcells & Gómez (1997)	42.71	11.41	3.47	11.02	15,72	11.1	9.57	3.76	0.58	0.19	2.68	0.12	0.31
Rift Volcanism	EEH-03	214893	3.08123e+06	Lava flow	Porphyritic	Tephrite/Basanite	Hernández-Gutiérrez (2014)	42.73	13.44	15.21		15.21	7.47	10.78	3.27	1.39	0.203	5.02	0.86			-0.09
Rift Volcanism	40191	201833*	3069961*	Lava flow	Porphyritic	Basanite	[893]	42.1	10.96	3.54	10.08	14.74	12.5	11.6	2.8	1.3	0.18	3.4	0.86	0.73
Rift Volcanism	40269	201833*	3069961*	Lava flow	Porphyritic	Basanite	[893]	42	10.71	2.84	10.35	14.34	12.52	11.63	3.18	1.42	0.23	3.37	0.86	0.51
Rift Volcanism	LDAEH7	206030	3080249	Lava flow	Porphyritic	Tephrite/Basanite	This study	42.01	13.52	14.95		14.95	6.26	10.34	3.75	1.91	0.191	4.83	0.91			0.4	69.4	27.9	55.9	1119.1	487.8	8.3	43	6.5	143.9	37.5	43.1	46.1	21.2	397.1	562.1		95.6	120	176.3		96.7	14.9
Rift Volcanism	LDAEH1	206105	3061068	Lava flow	Porphyritic	Tephrite/Basanite	This study	40.95	11.65	15.48		15.48	10.86	9.84	2.82	1.16	0.18	4.41	0.71			0.71	91.8	21.8	238.2	748.8	317.4	6.4	24.5	6.5	120.7	26.6	335.9	70	22.3	375.5	392.1		68.4	93.1	110.4		59.6	12.2
Rift Volcanism	LDAEH5	201830	3070059	Lava flow	Porphyritic	Tephrite/Basanite	This study	40.59	10.37	15.2		15.2	12.09	10.91	2.72	1.19	0.19	4.03	0.77			0.57	117.7	21.8	328.8	799.6	304.2	7.7	25.7	5.1	126.7	26.8	582.3	73.6	25.1	366.5	445.5		72.5	99	135.2		60.9
Rift Volcanism	DAEH5	201814	3070079	Dyke	Porphyritic	Tephrite/Basanite	This study	41.52	10.06	15.196		15.196	12.26	11.893	2.887	1.119	0.185	4.066	0.796			0.02	112.1	21.8	320.5	831.6	302.2	7.6	26.2	1.7	121.2	27.8	580.2	62.4	25.3	341.1	411.2		72.2	96.4	121.5		61.4	7.8
Rift Volcanism	LDAEH4	190164	3073693	Lava flow	Porphyritic	Tephrite/Basanite	This study	41.05	10.16	16.34		16.34	13.09	10.31	2.35	0.91	0.175	4.29	0.5			0.32	77.1	20.7	313.4	588.9	259.7	5.8	20	3.1	118.4	23.1	496.5	76.6	30.5	407.4	302.1		46.1	75.7	85.2		52.6
Rift Volcanism	40147			Lava flow	Unknown	Basanite	[877]; [893]	43.3	12.87	3.54	10.63	15.35	11.07	9.95	3.19	0.93	0.2	3.21	0.61	0.16			71	17	134	531	241	14	33	9	93	23
Rift Volcanism	47565	209673*	3082928*	Lava flow	Unknown	Basanite	[877]; [893]	42.7	12.23	4.8	8.77	14.55	13	9.91	3.13	1.04	0.18	3.09	0.55	0.44			39	18	155	579	241	15	38	10	83	24
Rift Volcanism	HP1	189716	3074199	Lava flow	Aphyric	Tephrite/Basanite	Hernández-Pacheco (1982)	46.12	17.69	3.14	6.38	10.23	4.64	8.97	4.92	2.05	0.22	3.34	1.16	0.44
Rift Volcanism	HP2	189721	3074187	Lava flow	Porphyritic	Picrobasalt	Hernández-Pacheco (1982)	41.02	8.82	3.66	10.84	15.71	17.34	11.22	1.55	0.66	0.19	3.64	0.36	0.39
Rift Volcanism	HP3	189579	3074353	Lava flow	Porphyritic	Picrobasalt	Hernández-Pacheco (1982)	40.6	9.58	2.94	10.8	14.94	15.51	12.06	1.71	0.75	0.19	3.78	0.45	0.57
Rift Volcanism	39967			Lava flow	Unknown	Basanite	[877]; [893]	40.91	10.65	3.36	10.3	14.81	13.5	10.66	3.18	1.85	0.2	4.1	0.88	0.27			72	16	284	428	180	20	30	9	82	20
Rift Volcanism	39918			Lava flow	Unknown	Foidite	[893]	40.1	9.69	4.68	10.98	16.88	12.98	13.07	2	1.18	0.17	3.95	0.58	0.35
Rift Volcanism	40952			Lava flow	Unknown	Basalt	[893]	42.5	12.36	4.5	9.49	15.05	11.53	10.04	2.91	1.4	0.22	3.93	0.83	0.45
Rift Volcanism	40951			Lava flow	Unknown	Basanite	[877]; [893]	44.35	15.42	4.48	7.69	13.03	6.71	9.18	4.37	1.9	0.19	3.57	1.16	0.59			33	17	39	652	271	21	89	9	87	16
Rift Volcanism	40948			Lava flow	Unknown	Tephrite	[893]	47.8	15.29	8.19	5.01	13.76	4.74	7.15	5.15	2.34	0.2	2.61	1.18	0.57
Rift Volcanism	41295			Lava flow	Unknown	Tephrite	[893]	44.1	14.53	4.44	8.11	13.45	7.06	9.54	3.8	1.77	0.19	4.24	1.01	0.77
Rift Volcanism	40961			Lava flow	Unknown	Tephrite	[893]	43.65	14.53	5.36	7.65	13.86	7.12	9.6	4.04	1.9	0.19	3.76	1.22	0.43
Rift Volcanism	40945			Lava flow	Unknown	Basanite	[893]	42.95	13.86	4.18	8.93	14.1	9.66	10	3.86	1.59	0.21	3.29	1.12	0.4
Rift Volcanism	40947			Lava flow	Unknown	Phonotephrite	[877]; [893]	47.3	17.59	3.01	6.63	10.38	4.47	7.53	6.2	2.4	0.2	2.85	1.18	0.24			12	18	23	904	346	20	48	7	86	29
Rift Volcanism	47644			Lava flow	Unknown	Basanite	[893]	42.2	14.02	5.27	8.4	14.6	8.77	9.67	3.88	1.69	0.18	3.88	0.8	0.74
Rift Volcanism	40451			Lava flow	Unknown	Tephrite	[877]; [893]	45.95	15.8	4.61	6.8	12.17	5.48	9.47	4.91	2.07	0.21	2.98	1.34	0.46			45	17	58	591	271	18	40	9	84	26
Rift Volcanism	40967			Lava flow	Unknown	Basanite	[877]; [893]	42.2	11.94	3.97	10.52	15.66	12.9	11.49	2.4	0.67	0.19	3.01	0.46	0.24			82	16	379	345	148	20	29	7	82	18
Rift Volcanism	40456			Lava flow	Unknown	Tephrite	[893]	43.4	14.4	5.8	8.58	15.33	6.35	10.12	4.02	1.72	0.19	3.75	1.06	0.75
Rift Volcanism	47757			Lava flow	Unknown	Picrobasalt	Balcells & Gómez (1997)	41.5	11.65	3.1	10.86	15,17	14.93	8.84	2.34	0.1	0.19	2.45	0.31	0.44
Rift Volcanism	47602			Lava flow	Unknown	Basanite	[893]	45.1	15.94	2.79	9.47	13.31	7.07	8.69	3.89	1.5	0.2	3.52	0.86	0.88
Rift Volcanism	47604			Lava flow	Unknown	Basanite	[893]	41.65	14.15	5.38	8.62	14.96	9.27	9.25	3.99	1.54	0.22	3.49	1.12	0.68
Rift Volcanism	40723			Lava flow	Unknown	Basanite	[877]; [893]	43.3	12.62	6.3	7.32	14.43	11.69	11.35	2.69	0.8	0.2	3.02	0.63	0.22			78	16	232	431	153	18	33	6	82	20
Rift Volcanism	40925			Lava flow	Unknown	Basanite	[877]; [893]	41.55	11.01	8.38	5.08	14.03	16.29	10.48	2.67	1.06	0.19	1.88	0.71	0.45			51	16	500	394	147	20	30	10	81	18
Rift Volcanism	39902			Lava flow	Unknown	Tephrite	[877]; [893]	46.7	17.08	8.37	2.18	10.79	4.33	7.57	5.28	2.34	0.2	3	1.09	1.23			30	20	43	737	607	27	72	14	87	28
Rift Volcanism	40235			Lava flow	Unknown	Basanite	[877]; [893]	41.1	12.88	6.6	10.53	18.3	10.99	10.87	2.67	1.18	0.2	2.44	0.67	0.16			53	16	225	392	181	19	32	9	82	20
Rift Volcanism	40846			Lava flow	Unknown	Foidite	[893]	40.25	9.56	4.54	10.83	16.58	14.19	12.51	2.08	0.84	0.19	3.81	0.58	0.34
Rift Volcanism	40202			Lava flow	Unknown	Foidite	[893]	40.25	9.43	5.03	10.9	17.14	14.17	12.54	1.73	0.72	0.17	3.91	0.54	0.41
Rift Volcanism	41343			Lava flow	Unknown	Basanite	[893]	44.4	15.24	3.96	9.52	14.54	6.01	10	5	1.01	0.19	3.9	0.7	0.37
Rift Volcanism	EH4	212772	3074331	Lava flow	Porphyritic	Basanite	[6665]	44.61	12.62		13.62	15.14	11.04	9.63	3.23	0.93	0.2	3.52	0.58	0.13	0.02		83	21	323	705	278	3.62	16	2.6	142	30	369	65	23	281	241		50	39.6	89	10.94	44.3	9.3	2.89	8.56	1.16	5.97	1.03
Rift Volcanism	EH8	189208	3075399	Lava flow	Porphyritic	Basanite	[6665]	41.8	9.56			14.99	14.5	10.99	2.23	0.87	0.19	4.37	0.49	0.18	0.03		85	17	404	594	257	3.01	13	2.14	130	28	700	85	27	368	199		36	29.3	68	9.31	40.4	9.04	2.75	7.99	1.06	5.24	0.87
Rift Volcanism	EH11	204379	3062720	Lava flow	Porphyritic	Basanite	[6665]	42.05	11.48			13.88	11.86	11.32	3.1	1.08	0.19	4.19	0.82	0.12	0.03		98	16	312	867	296	4.32	19	2.79	131	33	491	76	23	334	302		59	48.4	106	13.3	54.8	11.2	3.38	9.64	1.28	6.25	1.03
Rift Volcanism	EH17	204412	3078658	Lava flow	Aphyric	Basanite	[6665]	46.6	16.38			10.63	5.17	9.09	4.85	2.07	0.19	3.84	1.17	0.22	0.03		69	25	42	1254	554	8.74	42		155	43	23	34	1	233	478		99
Rift Volcanism	LT-17			Lava flow	Unknown	Foidite-Dunite	Aparicio et al. (2003)	39.7	14.95	3.58	9.58	14.23	9.02	12.02	4.28	1.15	0.18	4.8	0.59				92	26	85	893	368	3.5	26	3	124	34	120	44	26	328	335		72.5	52	108.5	108.5	60.9	12.4	4	9.99	1.43	7.48	1.31
Rift Volcanism	LT-18			Lava flow	Unknown	Basanite	Aparicio et al. (2003)	43.5	11.59	4.52	9.52	15.1	10.02	12.39	2.66	0.88	0.19	3.73	0.64				122	23	267	811	319	3.6	23	3	114	30	480	64	27	335	335		69.5	56.2	112.9	112.9	59.2	11.6	3.64	9.5	1.3	6.52	1.15
Rift Volcanism	JMDD EH 01	274522	180854	Lava flow	Porphyritic	Ankaramite	[15056]	39.8346	9.20962	16.8307		16.8307	14.2166	10.6775	1.83991	0.768138	0.205105	5.38903	0.470535			-0.535746	112.238	21.4075	338.367	648.92	281.149	3.49307	20.397	2.35725	146.299	27.001	751.442	87.6935	40.7245	437.07	231.152		49.6292	31.2534	68.8327	9.75797	44.3908	9.44102	2.8385	8.28623	1.11912	5.502	0.946611
Rift Volcanism	JMDD EH 02	274537	180837	Lava flow	Aphyric	Alkali Basalt	[15056]	46.9908	16.4092	12.1665		12.1665	4.76428	9.40819	4.56368	1.44633	0.207622	4.11232	1.00401			-0.302866	29.3094	26.6262	12.396	1138.8	419.236	6.02285	32.1469	3.85888	137.956	42.0176	2.74582	30.0441	14.9303	254.405	477.354		99.3485	59.1541	120.958	15.9517	68.3472	14.0022	4.25178	12.2051	1.68588	8.40984	1.4804
Rift Volcanism	JMDD EH 10	274758	175850	Lava flow	Porphyritic	Ankaramite	[15056]	41.3975	9.34946	17.772		17.772	14.2156	10.0043	2.22654	0.749568	0.213587	5.22884	0.667962			-0.756443	105.909	20.5596	330.165	724.08	308.503	3.78766	16.7144	2.1478	146.775	29.5593	685.963	88.9334	34.048	375.502	232.429		58.5035	41.866	89.3205	12.0181	51.946	10.3646	3.1091	8.91489	1.23915	6.01102	1.03929
Rift Volcanism	JMDD EH 11	274760	175850	Lava flow	Porphyritic	Alkali Basalt	[15056]	41.6347	10.5242	16.2783		16.2783	11.4882	10.7752	2.57079	1.01124	0.218918	5.43279	0.628637			-0.421883	100.103	21.9721	225.042	785.181	362.126	4.69199	25.3316	2.89412	147.833	32.9089	431.582	72.1502	34.6133	369.323	302.53		69.2688	45.2932	95.1998	12.9335	56.1513	11.2345	3.33694	9.58374	1.32749	6.59516	1.16512
Rift Volcanism	JMDD EH 12	274802	175849	Lava flow	Porphyritic	Alkali Basalt	[15056]	42.0764	10.7367	14.6692		14.6692	13.4885	10.7868	2.41152	0.676425	0.200126	3.72234	0.474298			-0.062383	118.403	19.4361	341.819	584.191	216.984	2.57299	16.3113	1.74375	120.454	25.9827	715.437	74.4597	36.1894	336.913	226.564		54.5199	29.0142	62.1792	8.42079	36.8707	7.69339	2.37985	7.00161	0.998294	5.05769	0.903481
Rift Volcanism	JMDD EH 13	274804	175848	Lava flow	Porphyritic	Ankaramite	[15056]	40.9141	8.92143	17.1906		17.1906	14.2402	10.4468	2.3282	0.582051	0.209739	5.14814	0.508793			-0.354038	64.0914	21.2782	303.781	706.467	314.284	4.28394	16.8082	2.45399	143.682	27.8157	690.799	83.014	35.3108	391.367	268.493		58.9852	40.199	84.7969	11.4477	49.4923	9.99386	2.98196	8.53324	1.16037	5.72237	0.982594
Rift Volcanism	JMDD EH 17	273956	175940	Lava flow	Porphyritic	Alkali Basalt	[15056]	41.0579	10.267	15.607		15.607	13.3098	11.073	2.6801	0.912845	0.210579	4.34256	0.826195			-0.751964	102.262	21.0947	277.323	896.843	313.77	4.88374	23.0107	2.79613	139.68	31.1865	576.534	71.8192	32.1305	357.181	329.966		69.2236	69.2236	107.947	14.0585	59.1438	11.5353	3.45973	9.92616	1.35116	6.45744	1.10169
Rift Volcanism	JMDD EH 18	274846	175302	Lava flow	Porphyritic	Ankaramite	[15056]	41.9871	11.2985	15.3443		15.3443	10.8789	10.0897	3.17675	0.984994	0.213782	5.41447	0.644342			0.102204	69.8613	21.5822	198.873	879.315	356.505	5.08314	27.303	2.98337	140.004	33.5147	488.466	66.0081	31.6334	356.656	310.801		72.6646	72.6646	97.8599	13.5344	59.08	11.6988	3.47929	9.91636	1.35688	6.75391	1.19158
Rift Volcanism	EH-ANK	189404	3074274	Lava flow	Porphyritic	Ankaramite	[19712]	40.24	8.76	17.78		17.78	13.39	11.46	2	0.83	0.19	5.03	0.42
Rift Volcanism	EEH-15	203357	3.0762e+06	Lava flow	Aphyric	Tephrite/Basanite	Hernández-Gutiérrez (2014)	41.52	12.025	16.54		16.54	8.725	11.885	2.5	1.14	0.195	5.47	0.8			-0.22
Rift Volcanism	MCG14-03-19-1	202744	3.06976e+06	Olivine-hosted melt inclusion, corrected	Melt Inclusion		Taracsák et al. (2019)	42.7415	13.8805	3.83109	9.84955	13.2952	4.94584	10.7762	3.68513	1.38903	0.162608	4.41099	0.79247	1.26	0.0210616					872.264	395.102		33.7478			38.4102					343.287		73.2295	59.0681	127.182	15.6293	69.9114	14.3021	4.62073	13.9009	2.26715	10.3555	1.72751
Rift Volcanism	MCG14-03-19-2	202744	3.06976e+06	Olivine-hosted melt inclusion, corrected	Melt Inclusion		Taracsák et al. (2019)	42.6364	13.9484	3.89006	10.001	13.4998	4.95404	10.9365	4.14518	1.40216	0.180956	4.19363	1.26867	1.052	0.152737					1064.2	407.063		35.192			37.7564					396.173		89.3113	73.987	145.924	16.914	79.6174	15.3672	5.43906	16.8502	2.41321	10.9695	1.75213
Rift Volcanism	MCG14-03-19-3	202744	3.06976e+06	Olivine-hosted melt inclusion, corrected	Melt Inclusion		Taracsák et al. (2019)	41.9555	13.8695	3.96719	10.1984	13.7665	5.08792	10.3592	3.78579	1.32174	0.18924	4.84279	0.798144	1.45	0.20758					920.89	376.271		30.6923			35.8428					376.989		68.395	54.5151	117.533	14.5496	65.2069	13.7157	5.02199	12.7849	2.11906	9.68263	1.43621
Rift Volcanism	MCG14-03-2-1	202744	3.06976e+06	Olivine-hosted melt inclusion, corrected	Melt Inclusion		Taracsák et al. (2019)	42.497	12.2717	3.97863	10.2288	13.8071	6.33361	13.1124	3.06048	1.32157	0.190783	5.05874	0.874424	0.119108	0.00149207					1223.05	403.425		35.0535			34.3258					472.081		82.6272	65.4344	136.931	16.773	71.9055	14.5524	5.14391	14.8673	2.32009	10.0652	1.39809
Rift Volcanism	MCG14-03-2-2	202744	3.06976e+06	Olivine-hosted melt inclusion, corrected	Melt Inclusion		Taracsák et al. (2019)	42.5893	14.0972	3.95442	10.1668	13.7234	6.08103	11	4.22714	1.58117	0.144381	4.78562	1.0227	0.284781	0.00118069					1143.96	437.393		35.6966			34.942					431.927		78.4374	62.7923	137.67	16.6469	73.9265	14.6203	4.78735	16.2362	2.04876	10.9298	1.52598
Rift Volcanism	MCG14-03-7-1	202744	3.06976e+06	Olivine-hosted melt inclusion, corrected	Melt Inclusion		Taracsák et al. (2019)	41.8298	14.4896	3.98995	10.2578	13.8463	5.08692	11.0704	4.20915	1.46229	0.160941	4.53399	0.909365	0.449931	0.137569					1059.72	373.812		28.8495			37.6667					423.743		73.7165	58.7125	125.393	16.1195	71.9702	15.5026	5.35166	14.4155	2.1308	9.69638	1.7062
Rift Volcanism	MCG14-03-7-2	202744	3.06976e+06	Olivine-hosted melt inclusion, corrected	Melt Inclusion		Taracsák et al. (2019)	43.3323	14.2912	3.79025	9.7441	13.1531	4.8354	11.7997	4.53028	1.64944	0.148599	3.7427	1.20167
Rift Volcanism	MCG14-03-8-1	202744	3.06976e+06	Olivine-hosted melt inclusion, corrected	Melt Inclusion		Taracsák et al. (2019)	41.7967	13.2531	4.00419	10.2951	13.8965	5.17895	10.9379	3.69995	0.961791	0.187451	5.24274	0.975531	1.32278	0.205879					1048.3	386.774		21.3279			39.9314					429.432		87.9129	77.2115	157.457	18.8183	83.4061	15.7533	4.99558	15.9964	2.46781	10.7392	1.6854
Rift Volcanism	MCG14-03-9-1	202744	3.06976e+06	Olivine-hosted melt inclusion, corrected	Melt Inclusion		Taracsák et al. (2019)	41.7062	12.3439	4.1061	10.5549	14.2479	6.80146	11.7321	3.06282	1.44423	0.212792	5.17301	0.940816	0.140674	0.00329921					1085.71	367.229		30.6248			31.276					417.706		73.2224	56.8045	121.684	15.4752	66.4413	14.1405	4.60563	13.8645	2.00209	8.5543	1.32378
Rift Volcanism	MJ14-01-6-1	204189	3.06443e+06	Olivine-hosted melt inclusion, corrected	Melt Inclusion		Taracsák et al. (2019)	40.8977	12.8462	4.11827	10.5886	14.2925	5.6722	13.4301	3.69956	1.14211	0.141535	4.37578	1.00254	0.0633194	0.0370884					1182.1	356.103		32.3846			35.7881					431.161		71.3158	67.2918	136.821	17.304	76.9545	14.4544	4.04819	11.8578	1.82516	7.65135	1.27775
Rift Volcanism	MJ14-01-7-1	204189	3.06443e+06	Olivine-hosted melt inclusion, corrected	Melt Inclusion		Taracsák et al. (2019)	43.5303	14.9125	3.71929	9.56152	12.9066	4.83714	10.1754	3.89776	1.69344	0.175522	4.07426	1.03548	0.0867849	0.000399332					1412.16	376.966		38.8458			35.2087					561.004		101.388	87.0114	170.78	19.425	81.8991	14.8315	4.58261	13.1203	2.05461	10.4553	1.4076
Rift Volcanism	MN14-01-10-1	198862	3.06864e+06	Olivine-hosted melt inclusion, corrected	Melt Inclusion		Taracsák et al. (2019)	42.4064	13.0879	3.86508	9.93641	13.4127	7.00583	12.2785	3.30497	0.702831	0.181817	3.98727	0.308894	0.451857	0.0340436					733	210.116		16.2335			28.5283					255.006		44.9542	34.7717	72.4315	8.96775	41.7139	9.03045	2.68805	8.83142	1.20133	5.69933	1.04151
Rift Volcanism	MN14-01-11-1	198862	3.06864e+06	Olivine-hosted melt inclusion, corrected	Melt Inclusion		Taracsák et al. (2019)	43.7452	12.9526	3.64062	9.35893	12.6333	7.90073	12.0473	2.91837	0.711486	0.134077	3.7835	0.267174	0.207646	0.0162826					705.159	209.567		15.4119			27.1967					244.734		44.547	34.2421	71.8092	9.19295	42.4518	9.5069	2.60204	7.69745	1.12145	6.64735	0.994661
Rift Volcanism	MN14-01-13-1	198862	3.06864e+06	Olivine-hosted melt inclusion, corrected	Melt Inclusion		Taracsák et al. (2019)	40.6403	12.7234	4.12474	10.6043	14.3141	7.36014	11.6352	3.06567	0.903894	0.153235	4.25761	0.508198	0.747723	0.215235					883.781	277.262		21.553			30.0829					324.027		58.8027	45.6159	96.2532	12.1895	54.6971	11.4936	3.44794	10.6376	1.42485	8.2924	1.20678
Rift Volcanism	MN14-01-13-2	198862	3.06864e+06	Olivine-hosted melt inclusion, corrected	Melt Inclusion		Taracsák et al. (2019)	40.1292	13.0801	4.18338	10.7567	14.5192	7.43144	11.2548	3.26833	0.996135	0.159266	4.6438	0.621619
Rift Volcanism	MN14-01-17-1	198862	3.06864e+06	Olivine-hosted melt inclusion, corrected	Melt Inclusion		Taracsák et al. (2019)	43.9717	14.1852	3.77638	9.70984	13.1063	6.41514	9.55762	4.62759	0.932329	0.190271	5.01915	0.501715	1.03665	0.156456					725.511	257.543		13.5658			31.6975					256.489		63.0898	25.1026	57.2294	8.0088	36.4868	9.25626	3.30232	9.07759	1.38426	7.86561	1.2565
Rift Volcanism	MN14-01-20-1	198862	3.06864e+06	Olivine-hosted melt inclusion, corrected	Melt Inclusion		Taracsák et al. (2019)	46.605	16.3788	3.25676	8.37198	11.3011	4.80646	8.00484	5.07069	0.622455	0.138543	4.00786	0.44037	1.11944	0.153467					638.234	203.996		9.18887			30.4521					184.039		37.8682	21.5482	52.969	7.16604	38.9032	10.3681	3.40686	10.2543	1.50263	7.34711	1.1728
Rift Volcanism	MN14-01-26-1	198862	3.06864e+06	Olivine-hosted melt inclusion, corrected	Melt Inclusion		Taracsák et al. (2019)	42.6647	13.495	3.9353	10.1158	13.6552	7.48928	13.1057	2.86483	0.700072	0.143986	3.93133	0.52133	0.136218	0.00271293					748.09	221.732		16.5443			29.2826					257.503		46.868	37.2213	76.5248	9.44607	48.6632	10.4573	2.91345	7.78879	1.10672	8.13148	1.17418
Rift Volcanism	MN14-01-4-1	198862	3.06864e+06	Olivine-hosted melt inclusion, corrected	Melt Inclusion		Taracsák et al. (2019)	43.168	13.65	3.77931	9.716	13.1151	5.27792	12.9824	3.05007	0.753709	0.199684	4.07884	0.429712	0.617	0.0603772					796.115	237.075		17.9349			31.193					279.917		51.3334	39.1936	80.3743	9.51666	47.6368	12.4246	3.33976	10.5745	1.54084	7.70911	1.23176
Rift Volcanism	MN14-01-5-3	198862	3.06864e+06	Olivine-hosted melt inclusion, corrected	Melt Inclusion		Taracsák et al. (2019)	41.1595	11.7378	4.25189	10.9308	14.7549	5.19653	14.8274	2.66804	0.363026	0.291787	4.90865	0.662619	0.356596	0.193346					799.347	290.216		14.1434			42.0952					317.626		73.5648	55.3578	115.351	14.6661	63.955	13.2909	4.36847	12.9655	2.15274	10.0474	1.79312
Rift Volcanism	TDE14-02-1-1	214356	3.0817e+06	Olivine-hosted melt inclusion, corrected	Melt Inclusion		Taracsák et al. (2019)	45.9455	14.643	3.37104	8.66638	11.6983	4.13554	10.7342	4.37633	1.21699	0.180591	4.07434	0.92503	1.73971	0.360807					1163.32	437.139		29.1875			44.7905					372.445		87.1679	69.9319	161.059	21.5411	84.9737	17.2875	5.73304	13.7917	2.68307	10.4609	1.85404
Rift Volcanism	TDE14-02-3-1	214356	3.0817e+06	Olivine-hosted melt inclusion, corrected	Melt Inclusion		Taracsák et al. (2019)	42.7458	13.9697	3.85589	9.91265	13.3806	4.67804	9.63729	3.84711	1.29864	0.172827	4.5101	0.740129	2.03374	0.331122					958.245	328.331		29.2683			37.1653					345.833		69.4148	49.4398	109.726	14.976	59.7736	12.095	4.69874	11.5928	2.01597	10.3147	1.60537
Rift Volcanism	TDE14-02-4-1	214356	3.0817e+06	Olivine-hosted melt inclusion, corrected	Melt Inclusion		Taracsák et al. (2019)	42.2022	12.7572	4.00134	10.2872	13.886	8.09846	13.3807	2.95088	0.732233	0.176574	3.83574	0.564638	0.535827	0.0647802					693.803	206.043		14.3941			26.8047					253.678		43.5514	35.0921	74.9202	9.13173	41.9626	8.33009	2.95563	9.40046	1.28154	6.69083	1.07205
Rift Volcanism	TDE14-02-4-3	214356	3.0817e+06	Olivine-hosted melt inclusion, corrected	Melt Inclusion		Taracsák et al. (2019)	42.5924	12.6967	3.80527	9.78441	13.2069	7.75428	12.7686	2.81285	0.776806	0.152605	3.69106	0.598604	0.782034	0.222643					647.623	224.471		14.3731			26.4998					252.098		46.8882	36.4535	76.7242	10.1117	43.3607	8.92176	3.11167	7.05097	1.38638	5.78162	1.04611
Rift Volcanism	TDE14-02-4-4	214356	3.0817e+06	Olivine-hosted melt inclusion, corrected	Melt Inclusion		Taracsák et al. (2019)	42.4447	12.7958	3.94313	10.1366	13.6831	8.0083	12.771	2.9499	0.788824	0.177609	3.82406	0.576486	0.582042	0.0530062					688.258	216.515		14.5536			26.4456					247.001		44.0612	35.8178	76.2446	9.52203	43.6508	10.3243	3.42143	7.77609	1.48713	6.20638	1.21952
Rift Volcanism	TDE14-02-8-1	214356	3.0817e+06	Olivine-hosted melt inclusion, corrected	Melt Inclusion		Taracsák et al. (2019)	44.8769	14.4164	3.53097	9.07865	12.2544	4.46122	10.3611	4.41645	1.34712	0.172121	3.77871	0.93821	1.77957	0.340869					1124.29	426.883		28.7014			38.0557					370.487		76.5632	64.8132	146.347	18.6591	75.7488	16.0504	4.46242	12.3689	2.62878	11.312	1.59768
Rift Volcanism	TDE14-02-8-2	214356	3.0817e+06	Olivine-hosted melt inclusion, corrected	Melt Inclusion		Taracsák et al. (2019)	44.7587	15.674	3.49053	8.97297	12.1123	4.48403	9.5223	3.74799	1.37577	0.174919	3.02866	0.884424	1.84224	0.136723					1076.37	371.93		32.4629			34.3787					436.73		78.4667	63.9755	134.114	16.3249	70.7597	13.6421	4.287	12.5926	2.13006	10.1	1.50499
Rift Volcanism	TSG1401-2-1	198458	3.07103e+06	Olivine-hosted melt inclusion, corrected	Melt Inclusion		Taracsák et al. (2019)	47.1881	15.8442	3.16307	8.13218	10.977	3.75446	7.7638	5.16923	1.98127	0.199123	3.36617	1.08821	1.53266	0.0605142					1458.14	510.462		49.1216			25.5029					576.14		110.262	86.4734	179.118	21.5277	91.9545	17.9119	4.8098	14.9584	1.84221	8.1847	1.04856
Rift Volcanism	TSG1401-4-1	198458	3.07103e+06	Olivine-hosted melt inclusion, corrected	Melt Inclusion		Taracsák et al. (2019)	44.1364	14.239	3.60267	9.26218	12.5024	4.55998	10.2891	3.99011	1.06128	0.164783	4.32065	0.80626	1.38933	0.14526					1136.23	409.946		24.4371			45.1627					370.907		66.7471	56.8999	123.995	16.6741	82.35	17.7721	5.49964	16.2649	2.25961	11.7434	1.76857
Rift Volcanism	TSG1401-4-2	198458	3.07103e+06	Olivine-hosted melt inclusion, corrected	Melt Inclusion		Taracsák et al. (2019)	46.0295	15.4892	3.32306	8.54446	11.5332	4.14963	9.39376	4.67167	1.31697	0.180934	2.97701	1.00651	1.50676	0.136087					1233	388.961		28.2569			37.2169					411.385		73.2752	59.6871	128.871	16.2629	81.1554	17.3068	4.89396	15.9881	2.03513	11.2093	1.51765
Rift Volcanism	TSG14-01-6-1	198458	3.07103e+06	Olivine-hosted melt inclusion, corrected	Melt Inclusion		Taracsák et al. (2019)	47.0193	15.4536	3.1298	8.04663	10.8616	3.47689	8.33224	4.78593	1.92488	0.192389	3.72283	1.13549	1.607	0.0515261					1376.12	447.796		48.4203			35.807					527.833		96.0178	86.9828	177.181	20.479	90.4023	16.3177	4.70845	14.9496	1.89888	8.45634	1.49051
Rift Volcanism	TSG14-02c-04-1	198394	3.07124e+06	Olivine-hosted melt inclusion, corrected	Melt Inclusion		Taracsák et al. (2019)	43.6649	14.0283	3.72953	9.58783	12.9422	4.89667	9.72549	4.3834	1.83478	0.207469	4.76098	0.974417	0.194068	0.00238251					1131.45	427.549		45.5578			36.5718					467.835		93.7906	76.6997	153.452	17.9613	77.4504	16.0331	5.03954	15.7302	2.13992	11.009	1.5326
Rift Volcanism	TSG14-02c-05-1	198394	3.07124e+06	Olivine-hosted melt inclusion, corrected	Melt Inclusion		Taracsák et al. (2019)	41.2242	12.8914	3.99132	10.2616	13.8514	5.46948	11.6989	3.54914	1.01459	0.161324	4.56567	0.852298	1.26689	0.132059					1012.46	319.508		25.2286			36.8868					350.949		60.0561	46.5632	103.177	13.2519	65.1533	14.3462	3.79826	11.7678	1.6035	9.46908	1.47405
Rift Volcanism	TSG14-02c-07-1	198394	3.07124e+06	Olivine-hosted melt inclusion, corrected	Melt Inclusion		Taracsák et al. (2019)	41.6841	13.6069	3.95681	10.174	13.7327	5.3294	10.4286	3.97827	1.4282	0.146332	4.14314	1.01847	1.35752	0.18183					1181.36	364.213		29.9465			38.9955					434.013		76.2947	60.3931	128.55	16.4995	76.0556	14.8537	4.22591	11.9566	1.90136	9.94682	1.51381
Rift Volcanism	TSG14-02c-07-2	198394	3.07124e+06	Olivine-hosted melt inclusion, corrected	Melt Inclusion		Taracsák et al. (2019)	41.0453	12.9638	4.05838	10.4351	14.0852	5.5238	11.2871	3.54232	1.17526	0.182082	4.63286	0.892883	1.36559	0.102889					1082.34	378.248		27.5553			37.6248					360.443		65.9891	51.8601	113.572	14.8898	72.0246	15.9516	5.04055	15.4781	1.83332	10.5979	1.50403
Rift Volcanism	TSG14-02c-07-3	198394	3.07124e+06	Olivine-hosted melt inclusion, corrected	Melt Inclusion		Taracsák et al. (2019)	42.2256	13.2146	3.94004	10.1293	13.6729	5.3767	11.0468	3.63582	1.33068	0.173695	5.02735	0.787026	0.988081	0.0154646					1026.75	364.429		30.2676			34.3871					345.117		68.5176	57.7764	121.656	15.3926	71.4145	14.1875	4.33968	15.9887	1.70192	9.38345	1.34863
Rift Volcanism	TSG14-02c-09-1	198394	3.07124e+06	Olivine-hosted melt inclusion, corrected	Melt Inclusion		Taracsák et al. (2019)	46.3345	13.4571	3.28588	8.44813	11.4035	4.70422	10.9103	3.45395	1.0468	0.175941	4.48012	0.869878	0.933887	0.189769					756.19	351.714		22.7626			35.766					246.388		53.7743	41.09	90.684	11.7868	55.8757	13.1164	3.58411	11.1948	1.7483	8.56318	1.37502
Rift Volcanism	TSG14-02c-09-2	198394	3.07124e+06	Olivine-hosted melt inclusion, corrected	Melt Inclusion		Taracsák et al. (2019)	41.7177	12.7021	3.97399	10.2163	13.7905	5.51873	11.447	3.47468	1.30483	0.142381	4.88484	0.786022	1.09075	0.13668					1027.99	337.5		29.6938			31.8367					345.217		66.838	52.4078	112.765	13.4247	63.824	12.4112	3.96416	9.70849	1.59355	8.55514	1.25698
Rift Volcanism	TSG14-02c-09-3	198394	3.07124e+06	Olivine-hosted melt inclusion, corrected	Melt Inclusion		Taracsák et al. (2019)	44.8067	13.8475	3.54162	9.10505	12.2904	5.00039	10.7686	3.54162	1.1871	0.201788	4.50725	0.683125	1.0233	0.0912558					807.411	354.734		26.4264			35.6267					262.318		54.8944	43.6697	96.0891	12.8641	58.2732	12.9868	4.19143	11.7311	1.75074	9.42154	1.34151
Rift Volcanism	TSG14-02c-10-1	198394	3.07124e+06	Olivine-hosted melt inclusion, corrected	Melt Inclusion		Taracsák et al. (2019)	41.5581	13.1312	3.97335	10.2143	13.7879	5.63824	10.8666	3.68321	1.26279	0.148964	4.50008	0.941492	1.16694	0.211354					1061.34	366.393		32.6733			38.007					360.41		67.144	48.0956	107.171	13.8082	69.1295	13.7807	4.18711	11.1638	1.82329	9.57672	1.55099
Rift Volcanism	TSG14-02c-11-1	198394	3.07124e+06	Olivine-hosted melt inclusion, corrected	Melt Inclusion		Taracsák et al. (2019)	43.5239	12.9247	3.71066	9.54085	12.8782	5.18533	10.8032	3.66467	1.37095	0.16831	4.57374	0.782839	1.37737	0.0849654					942.73	353.683		33.6041			33.7391					331.168		66.2661	52.6777	115.428	14.2891	66.2929	13.1007	3.91665	12.4473	1.56888	7.85686	1.36202
Rift Volcanism	TSG14-02cb-12-1	198394	3.07124e+06	Olivine-hosted melt inclusion, corrected	Melt Inclusion		Taracsák et al. (2019)	41.7705	14.0754	4.00799	10.3057	13.9105	5.17954	11.0679	4.19978	1.57393	0.164116	4.87108	0.839364	0.484274	0.171225					1056.48	415.077		36.9219			37.909					367.674		88.6379	88.9512	184.362	21.1124	77.4409	16.6193	4.99989	13.9282	2.44874	8.85805	1.67679
Rift Volcanism	TSG14-02cb-12-2	198394	3.07124e+06	Olivine-hosted melt inclusion, corrected	Melt Inclusion		Taracsák et al. (2019)	41.066	14.1281	4.13338	10.6259	14.3435	5.37202	11.3358	3.84982	1.55273	0.16246	4.48883	0.987562	0.416352	0.113403					1146.21	428.237		35.429			39.6055					406.821		87.0446	77.2801	160.338	19.9468	82.1886	14.9586	5.35863	12.1279	2.31187	10.0651	1.56595
Rift Volcanism	TSG14-02cb-13-1	198394	3.07124e+06	Olivine-hosted melt inclusion, corrected	Melt Inclusion		Taracsák et al. (2019)	45.2342	14.6669	3.50113	9.00248	12.1514	4.93938	9.55848	4.12377	1.51981	0.155164	4.63004	0.914073	0.951083	0.0290322					973.24	376.799		31.2803			33.8294					332.134		70.4484	52.4509	115.369	15.156	61.7547	13.9862	4.11957	11.0925	2.05229	10.3513	1.39436
Rift Volcanism	TSG14-02cb-15-1	198394	3.07124e+06	Olivine-hosted melt inclusion, corrected	Melt Inclusion		Taracsák et al. (2019)	40.1344	13.7302	4.41173	11.342	15.31	5.97584	10.3737	3.76454	1.56807	0.144258	5.43735	0.812193	0.777133	0.203315					1063.65	413.928		39.6308			37.6863					383.893		96.9886	102.815	202.753	21.6982	82.2169	14.6136	4.6735	14.7102	2.49956	10.7689	1.53118
Rift Volcanism	TSG14-02cb-15-2	198394	3.07124e+06	Olivine-hosted melt inclusion, corrected	Melt Inclusion		Taracsák et al. (2019)	42.8511	13.9028	3.85248	9.90395	13.3689	5.23618	11.2877	3.90126	1.61366	0.149321	4.71655	0.944703	0.829273	0.171967					1141.27	446.305		44.3763			38.5331					414.742		104.558	105.73	210.921	23.6722	87.6096	15.1702	4.92773	15.7212	2.45071	10.4295	1.68296
Rift Volcanism	TSG14-02cb-16-1	198394	3.07124e+06	Olivine-hosted melt inclusion, corrected	Melt Inclusion		Taracsák et al. (2019)	44.4036	14.0296	3.69988	9.51285	12.8405	5.08996	9.36805	4.68153	2.15402	0.174758	5.14688	1.14242	0.119658	0					1019.48	488.736		49.7385			39.7282					484.554		104.777	86.801	178.186	21.2806	88.6356	16.4532	5.91694	14.7238	2.37025	11.223	1.85026
Rift Volcanism	TSG14-02cb-17-1	198394	3.07124e+06	Olivine-hosted melt inclusion, corrected	Melt Inclusion		Taracsák et al. (2019)	43.2662	14.1288	3.74722	9.63236	13.0026	5.17609	11.1838	4.1091	1.27392	0.147104	3.25198	0.902237	0.957459	0.218621					1099.06	400.857		26.2542			38.8975					383.477		68.2499	55.2028	125.744	17.029	75.49	16.6437	5.17628	14.8861	2.45674	10.5129	1.67856
Rift Volcanism	TSG14-02cb-17-2	198394	3.07124e+06	Olivine-hosted melt inclusion, corrected	Melt Inclusion		Taracsák et al. (2019)	44.8891	14.8907	3.52058	9.05206	12.2185	4.77814	11.5432	4.72812	1.39162	0.152068	2.61517	1.1235	1.03148	0.196006					1279.03	403.881		30.5929			35.9622					450.437		82.6511	64.1151	142.535	18.5282	83.1221	16.6187	5.67801	12.6419	1.8918	11.0662	1.48317
Rift Volcanism	TSG14-02c-18-1	198394	3.07124e+06	Olivine-hosted melt inclusion, corrected	Melt Inclusion		Taracsák et al. (2019)	41.1242	13.2702	4.06926	10.4625	14.1224	5.52509	11.7084	3.71903	1.15073	0.165792	4.7491	0.981998	0.85021	0.229345					1096.29	335.937		25.8501			41.5895					386.054		67.153	52.5063	116.489	14.1661	74.3923	15.6397	4.47823	14.4897	1.92534	10.7974	1.52585
Rift Volcanism	TSG14-02cb-19-1	198394	3.07124e+06	Olivine-hosted melt inclusion, corrected	Melt Inclusion		Taracsák et al. (2019)	40.0384	13.4076	4.26337	10.9603	14.7948	5.83543	11.7542	3.80371	1.28391	0.163674	4.1634	1.20354	0.7823	0.2284					1205.62	430.187		26.6934			38.712					375.219		73.2655	59.3294	136.635	18.5937	75.9751	16.6761	4.93247	12.9309	2.33258	10.4604	1.51279
Rift Volcanism	TSG14-02cb-19-2	198394	3.07124e+06	Olivine-hosted melt inclusion, corrected	Melt Inclusion		Taracsák et al. (2019)	39.7894	13.5191	4.33312	11.1402	15.0374	5.98146	11.757	3.39472	1.22277	0.15591	4.25664	1.36495	0.800524	0.253435					1124.49	420.783		26.2574			39.4501					357.112		71.2902	58.1317	132.88	17.1528	79.3677	16.3826	5.53668	15.3638	2.4867	10.3784	1.76863
Rift Volcanism	TSG14-02cb-21-1	198394	3.07124e+06	Olivine-hosted melt inclusion, corrected	Melt Inclusion		Taracsák et al. (2019)	46.2748	15.5716	3.39352	8.72402	11.7762	4.58155	9.84241	4.2747	2.04499	0.186734	4.05466	1.04066	0.649	0.00920439					1079.61	395.282		46.0627			32.3534					424.148		79.6139	69.1273	138.107	16.1726	63.885	12.9336	4.83293	12.659	1.93419	8.94222	1.23556
Rift Volcanism	TSG14-02cb-22-1	198394	3.07124e+06	Olivine-hosted melt inclusion, corrected	Melt Inclusion		Taracsák et al. (2019)	41.0975	13.1604	4.07669	10.4798	14.1464	5.44145	11.1832	3.85167	1.28943	0.162402	4.56878	1.05855	1.16371	0.230808					1092.89	388.209		27.6071			38.7645					394.985		74.6181	60.2903	132.133	16.3869	72.8324	16.4525	4.93257	12.6198	2.13524	11.3149	1.62031
Rift Volcanism	TSG14-02c-22-1/1	198394	3.07124e+06	Olivine-hosted melt inclusion, corrected	Melt Inclusion		Taracsák et al. (2019)	41.1865	13.2327	4.05066	10.4139	14.0571	5.48347	11.083	3.56884	1.33722	0.165811	4.8368	0.750051	1.1437	0.242561					1001.78	352.949		33.9234			34.69					344.028		76.7851	75.2126	151.796	16.962	72.4531	14.5455	3.90218	14.7104	1.75729	10.3722	1.36327
Rift Volcanism	TSG14-02cb-22-2	198394	3.07124e+06	Olivine-hosted melt inclusion, corrected	Melt Inclusion		Taracsák et al. (2019)	44.7333	15.3368	3.51467	9.03517	12.1963	4.6453	11.1054	4.39482	2.21078	0.146527	2.0989	1.78407
Rift Volcanism	TSG14-02c-23-1/2	198394	3.07124e+06	Olivine-hosted melt inclusion, corrected	Melt Inclusion		Taracsák et al. (2019)	42.442	13.5353	3.87661	9.96506	13.4517	5.26635	10.4309	3.72589	1.36038	0.109614	4.83964	0.791763	1.27112	0.210273					981.679	365.346		33.5195			34.5314					346.22		72.3249	57.5033	119.326	14.7968	64.2262	13.808	4.10626	12.1304	1.5791	9.35788	1.33228
Rift Volcanism	TSG14-02cb-23-2	198394	3.07124e+06	Olivine-hosted melt inclusion, corrected	Melt Inclusion		Taracsák et al. (2019)	44.1984	12.5117	3.62395	9.31634	12.5757	5.05489	12.2253	2.75989	1.24166	0.172616	4.60472	1.08866	0.98	0.240137					1251.07	420.902		29.6346			48.3653					419.523		78.7772	58.1187	134.397	18.0558	84.7557	17.4461	5.69691	15.9684	2.76388	12.1364	2.02398
Rift Volcanism	TSG14-02c-25-1	198394	3.07124e+06	Olivine-hosted melt inclusion, corrected	Melt Inclusion		Taracsák et al. (2019)	41.6709	13.3989	3.9798	10.2322	13.8117	5.39447	10.67	3.70096	1.34447	0.167694	4.39708	0.956438	1.28828	0.222187					1043	397.361		28.7676			38.9492					387.432		75.1578	56.2958	122.538	16.47	70.0268	13.9524	4.71148	13.2683	2.16806	12.1116	1.45779
Rift Volcanism	TSG14-02c-29-2	198394	3.07124e+06	Olivine-hosted melt inclusion, corrected	Melt Inclusion		Taracsák et al. (2019)	42.0283	13.1596	4.00138	10.2862	13.885	5.61493	12.4514	3.36502	1.10033	0.160567	4.24174	0.779195	1.01566	0.219443					989.615	317.438		23.7311			37.7552					357.955		63.5763	52.1472	112.982	14.1514	66.0051	14.047	4.79806	11.528	1.71805	11.2354	1.64582
Rift Volcanism	TSG14-02c-3-1	198394	3.07124e+06	Olivine-hosted melt inclusion, corrected	Melt Inclusion		Taracsák et al. (2019)	42.6024	13.0453	3.83784	9.86733	13.3191	5.29634	11.1069	3.83686	1.08996	0.166183	4.50062	0.83189	1.32009	0.20909					1004.61	337.998		24.0766			39.6742					348.12		65.1671	49.4534	111.741	14.503	71.6527	14.3693	4.65353	13.8821	2.24768	10.6515	1.81593
Rift Volcanism	TSG14-02c-3-2	198394	3.07124e+06	Olivine-hosted melt inclusion, corrected	Melt Inclusion		Taracsák et al. (2019)	41.9723	12.941	3.94264	10.1368	13.6828	5.43099	10.9809	3.82372	1.12577	0.170571	4.56839	0.868452	1.23854	0.206539					1017.92	353.289		22.647			39.9147					355.562		65.6266	51.4428	114.282	14.9859	70.3637	15.5991	4.99206	13.5682	2.33778	10.0627	1.69542
Rift Volcanism	TSG14-02cb-33-1	198394	3.07124e+06	Olivine-hosted melt inclusion, corrected	Melt Inclusion		Taracsák et al. (2019)	42.1499	13.5445	3.9272	10.0982	13.6304	5.56934	10.8423	3.61703	1.41638	0.149196	4.78803	0.800949	0.958569	0.178641					958.595	393.02		30.4775			34.3981					350.946		74.7701	62.7497	134.383	16.2959	69.4601	14.5055	4.57897	12.333	1.86627	9.50375	1.34271
Rift Volcanism	TSG14-02cb-4-1	198394	3.07124e+06	Olivine-hosted melt inclusion, corrected	Melt Inclusion		Taracsák et al. (2019)	41.7692	13.6266	4.02263	10.3424	13.9603	5.37996	12.0185	4.17268	1.25664	0.141162	3.84494	1.02071	0.784208	0.220935					1141.78	392.306		25.3167			40.3371					396.905		71.2247	60.5326	136.215	17.0604	81.1978	17.8895	5.68027	15.6421	2.39899	12.0367	1.8824
Rift Volcanism	TSG14-02cb-4-3	198394	3.07124e+06	Olivine-hosted melt inclusion, corrected	Melt Inclusion		Taracsák et al. (2019)	43.015	14.2813	3.78442	9.72855	13.1323	5.06699	11.4393	4.19678	1.41706	0.146353	3.48183	1.15698	0.819206	0.197603					1342.49	431.426		31.4556			36.9445					484.946		84.4204	70.6015	157.552	19.5792	88.8888	17.0958	6.1742	17.6333	2.67689	11.067	1.67505
Rift Volcanism	TSG14-02cb-6-1	198394	3.07124e+06	Olivine-hosted melt inclusion, corrected	Melt Inclusion		Taracsák et al. (2019)	41.8393	13.5865	3.97816	10.2272	13.8051	5.48811	11.6473	3.88934	1.35698	0.153955	4.21798	1.08953	0.848241	0.241578					1337.5	437.173		35.1007			41.45					483.918		86.4488	72.1906	157.928	19.6335	89.9913	17.686	5.99217	17.6889	2.60047	12.2091	1.83805
Rift Volcanism	TSG14-02cb-8-1	198394	3.07124e+06	Olivine-hosted melt inclusion, corrected	Melt Inclusion		Taracsák et al. (2019)	41.9178	13.4002	3.97855	10.2294	13.8077	5.36522	11.2857	3.96869	1.28805	0.175553	4.44505	1.05529	1.16036	0.203655					1218.34	429.334		27.6244			39.9497					376.47		70.6976	55.166	129.931	17.5828	76.6223	17.2548	5.51209	14.3068	2.29154	9.76022	1.93346
Rift Volcanism	TSG14-02cb-8-2	198394	3.07124e+06	Olivine-hosted melt inclusion, corrected	Melt Inclusion		Taracsák et al. (2019)	44.3714	12.4842	3.57026	9.17955	12.3906	5.05186	11.5231	2.73947	1.44172	0.161488	4.72305	0.865811	0.90215	0.159235					1018.69	400.496		35.691			38.2801					382.366		82.4725	70.0442	149.641	17.0721	74.083	13.4055	4.43796	12.9758	2.12677	10.1164	1.47013
Rift Volcanism	WH14-01-4-1	198394	3.07335e+06	Olivine-hosted melt inclusion, corrected	Melt Inclusion		Taracsák et al. (2019)	47.1036	16.6578	3.15963	8.12263	10.9644	3.56818	8.58461	4.63359	1.16137	0.144429	2.8223	0.67565	2.04335	0.232312					861.052	352.43		19.3156			34.3692					561.824		100.348	42.5761	98.315	11.9155	53.3883	11.7159	4.13067	10.5904	1.99409	9.43157	1.54905
Rift Volcanism	WH14-01-4-4	198394	3.07335e+06	Olivine-hosted melt inclusion, corrected	Melt Inclusion		Taracsák et al. (2019)	47.4528	16.9618	3.18372	8.18586	11.0493	3.58581	8.66296	4.65105	1.16326	0.141032	2.86065	0.70716	2.222	0.22495					855.978	366.3		17.0584			33.6054					353.383		99.9425	39.6073	90.874	11.4157	52.2948	11.7969	4.5938	12.3084	1.93416	9.29933	1.49244
Rift Volcanism	WH14-01-4-5	198394	3.07335e+06	Olivine-hosted melt inclusion, corrected	Melt Inclusion		Taracsák et al. (2019)	53.4712	14.2467	2.82848	7.27237	9.8163	3.56595	9.4025	1.99669	1.26825	0.150504	3.12346	0.884965	1.871	0.243311					866.021	375.773		16.3052			31.7077					368.274		97.636	41.1502	94.0019	11.8578	56.0909	11.7873	4.26958	11.4423	2.0789	8.68619	1.54272
Rift Volcanism	TSG14-02cb-29-1	198394	3.07124e+06	Olivine-hosted melt inclusion, corrected	Melt Inclusion		Taracsák et al. (2019)	41.5918	13.1332	3.94526	10.1426	13.691	5.59499	12.5038	3.30236	1.0744	0.178584	4.231	0.833071
Rift Volcanism	TSG14-02cb-25-2	198394	3.07124e+06	Olivine-hosted melt inclusion, corrected	Melt Inclusion		Taracsák et al. (2019)	43.7993	14.4426	3.58709	9.22312	12.4494	4.96556	10.4544	3.96225	1.26496	0.160645	3.36007	0.975412
Rift Volcanism	WH14-01-4-3	198394	3.07335e+06	Olivine-hosted melt inclusion, corrected	Melt Inclusion		Taracsák et al. (2019)	48.0624	17.7713	3.09218	7.94817	10.7293	3.50561	9.58886	4.84398	1.11915	0.142146	3.27437	0.754776
Rift Volcanism	MCG14-03-16-4	202744	3.06976e+06	Olivine-hosted melt pocket, corrected	Melt Inclusion		Taracsák et al. (2019)	41.7029	11.983	3.75301	9.61145	12.9884	4.86382	14.9655	2.17685	1.12322	0.173735	5.47634	0.801407	0.14997	0.00168764					1015.47	340.62		24.0599			31.9264					375.628		64.3994	54.1994	117.391	14.7839	67.3841	15.2353	4.32936	13.5538	2.1756	9.85317	1.32781
Rift Volcanism	MN14-01-3-1	198862	3.06864e+06	Olivine-hosted melt pocket, corrected	Melt Inclusion		Taracsák et al. (2019)	46.4574	16.7763	3.41292	8.74046	11.8114	5.1173	8.66596	4.31527	0.595199	0.174295	3.79097	0.350801	1.183	0.147092					481.048	156.797		6.78592			30.3872					149.565		30.1393	17.0561	41.197	5.7787	26.0183	7.92574	2.7406	6.06541	1.12511	7.43442	1.27406
Rift Volcanism	MN14-01-5-1	198862	3.06864e+06	Olivine-hosted melt pocket, corrected	Melt Inclusion		Taracsák et al. (2019)	42.2288	13.7492	3.93982	10.0898	13.6349	5.44163	13.5092	3.37768	0.861498	0.210771	4.20013	0.605452	0.103	0.026201					788.23	258.307		17.2541			32.4811					290.456		52.5885	43.025	89.9939	10.5336	48.5278	9.83827	3.68559	10.5084	1.60541	8.40276	1.32373
Rift Volcanism	MN14-01-6-1	198862	3.06864e+06	Olivine-hosted melt pocket, corrected	Melt Inclusion		Taracsák et al. (2019)	42.7768	13.5167	3.72292	9.53438	12.8843	4.63186	14.3754	3.48176	0.818809	0.187208	4.37302	0.674067	0.335	0.0307397					729.752	224.462		16.1592			28.8218					261.349		47.2753	36.0917	78.1608	9.47671	44.9763	9.96533	3.34603	9.74315	1.47385	6.17926	1.26202
Rift Volcanism	TDE14-02-12-2	214356	3.0817e+06	Olivine-hosted melt pocket, corrected	Melt Inclusion		Taracsák et al. (2019)	43.7286	14.5393	3.50266	8.97028	12.122	4.62159	11.4204	3.94562	1.58464	0.19788	4.66971	0.98015	0.164979	0.0042649					1099.96	477.231		38.8864			39.5767					404.762		86.6753	66.8255	146.429	18.6473	84.0873	17.7353	5.75308	15.0999	2.38833	10.8011	1.59955
Rift Volcanism	TSG14-02-3-1-2av	198394	3.07124e+06	Cpx-hosted melt inclusion, corrected	Melt Inclusion		Taracsák et al. (2019)	44.8461	14.966	3.45373	8.84498	11.9527	4.87519	9.36235	4.5321	1.62702	0.136783	3.88737	1.18601	0.842268	0.168857					1220.29	415.08		34.6331			27.8639					426.429		78.021	51.9257	103.009	12.6977	62.21	11.9821	3.81262	11.1866	1.26913	7.01776	1.10587
Rift Volcanism	TSG14-02b-1-1-1	198394	3.07124e+06	Cpx-hosted melt inclusion, corrected	Melt Inclusion		Taracsák et al. (2019)	44.6616	14.6632	3.45942	8.85953	11.9723	5.34949	9.7487	4.17871	2.01204	0.120695	3.44535	1.42344
Rift Volcanism	TSG14-02b-2-1-1	198394	3.07124e+06	Cpx-hosted melt inclusion, corrected	Melt Inclusion		Taracsák et al. (2019)	43.5111	14.6399	3.63057	9.29786	12.5647	4.87391	9.40331	4.40607	2.08748	0.15301	4.18945	0.981889	1.22194	0.0143061					1028.04	454.655		56.3363			35.428					572.991		116.897	101.778	192.767	20.308	83.2045	14.4721	4.23168	13.3023	2.11728	9.48492	1.54638
Rift Volcanism	TSG14-02b-2-1-2	198394	3.07124e+06	Cpx-hosted melt inclusion, corrected	Melt Inclusion		Taracsák et al. (2019)	42.4881	14.8482	3.8415	9.83805	13.2947	5.03558	9.46999	4.57022	1.74753	0.157543	3.53011	1.39682	1.125	0.0745061					1389.61	326.767		42.3275			26.9476					578.649		95.538	62.8403	116.83	12.8293	59.4633	11.3542	3.34846	12.9754	1.36102	6.03552	1.1481
Rift Volcanism	TSG14-02b-2-1-3	198394	3.07124e+06	Cpx-hosted melt inclusion, corrected	Melt Inclusion		Taracsák et al. (2019)	42.8274	14.6864	3.76795	9.64967	13.0401	4.84436	9.63538	4.59827	1.71164	0.144482	3.69694	1.2148	1.06182	0.0673343					1410.58	347.032		41.5278			28.0518					577.969		104.383	65.0313	124.77	14.6076	61.7825	12.6943	3.68259	11.0177	1.53213	7.71656	1.07351
Rift Volcanism	TSG14-02b-2-1-4	198394	3.07124e+06	Cpx-hosted melt inclusion, corrected	Melt Inclusion		Taracsák et al. (2019)	41.1131	14.3628	3.99429	10.2293	13.8234	4.8009	9.53827	4.43673	1.59826	0.130781	3.63549	1.36448	1.14294	0.0700097					1406.79	332.065		38.766			26.5481					575.124		95.4751	61.5004	117.188	14.0294	61.7772	12.8434	3.51574	10.4952	1.36236	6.69522	1.05661
Rift Volcanism	TSG14-02b-4-1-1av	198394	3.07124e+06	Cpx-hosted melt inclusion, corrected	Melt Inclusion		Taracsák et al. (2019)	44.4454	12.9358	3.55821	9.11254	12.3142	6.49358	11.7439	3.58129	1.61954	0.119915	3.79789	0.883259	0.804745	0.0313068					1076.12	361.006		46.9679			27.1546					501.845		85.2447	56.1044	110.596	12.6652	59.536	11.2265	3.32631	10.2722	1.27223	7.35147	1.04446
Rift Volcanism	TSG14-02b-4-1-3	198394	3.07124e+06	Cpx-hosted melt inclusion, corrected	Melt Inclusion		Taracsák et al. (2019)	45.138	14.8956	3.48676	8.92955	12.067	4.67269	8.81867	4.51255	2.03195	0.146889	3.72207	1.16539	0.959174	0.0466115					1172.24	354.564		47.3709			26.5646					522.213		91.7181	58.7565	109.125	12.4426	57.0195	10.82	3.3421	10.3808	1.2773	7.10482	1.2309
Rift Volcanism	TSG14-02b-4-4-1	198394	3.07124e+06	Cpx-hosted melt inclusion, corrected	Melt Inclusion		Taracsák et al. (2019)	43.554	14.0749	3.68755	9.44376	12.7618	4.76173	9.10138	4.28557	2.25854	0.132804	3.94692	1.3249
Rift Volcanism	TSG14-02b-4-4-4	198394	3.07124e+06	Cpx-hosted melt inclusion, corrected	Melt Inclusion		Taracsák et al. (2019)	45.6464	16.2395	3.44534	8.82347	11.9236	3.73639	7.86986	5.44304	2.55788	0.148617	3.97526	0.788837
Rift Volcanism	MN14-01-5-5	198862	3.06864e+06	Matrix glass, corrected	Aphyric		Taracsák et al. (2019)	43.5638	14.4479	3.8085	9.79186	13.2172	4.55989	12.731	3.20778	1.00218	0.204204	4.64613	0.791041	0.165	0.00571394					725.194	292.012		26.0745			34.9206					342.623		68.5593	48.5035	103.455	12.9169	55.9618	10.9556	3.93359	10.0414	1.85189	10.0289	1.55788
Rift Volcanism	MCG14-03-2-3	202744	3.06976e+06	Matrix glass, corrected	Aphyric		Taracsák et al. (2019)	42.6852	13.1407	3.79006	9.70632	13.1167	5.48769	12.2642	3.47688	1.51309	0.191569	5.21544	0.93364	0.079199	0.00539918					1219.47	403.257		35.1981			34.824					480.609		83.6124	65.4662	137.064	16.3037	72.01	15.5592	5.22464	14.6512	2.3439	9.82135	1.52096
Rift Volcanism	MJ14-01-6-2	204189	3.06443e+06	Matrix glass, corrected	Aphyric		Taracsák et al. (2019)	44.6342	15.0669	3.39866	8.70394	11.7621	4.41394	10.1293	4.04613	1.70735	0.183374	4.1419	1.12827	0.38477	0.00107136					1493.74	389.485		42.6737			36.8369					602.865		105.87	88.0698	180.64	20.2318	86.6986	16.8551	4.7973	16.6042	2.04695	10.2562	1.47444
Rift Volcanism	MN14-01-13-3	198862	3.06864e+06	Matrix glass, corrected	Aphyric		Taracsák et al. (2019)	43.3651	13.9989	3.73637	9.56882	12.9308	5.46551	12.5902	3.27969	0.830956	0.2097	4.21777	0.55865	0.0688825	0					801.964	237.298		18.7679			30.3804					291.512		52.6958	38.7439	81.7423	10.3004	49.0461	10.4276	2.98346	8.4738	1.31006	7.60129	1.21447
Rift Volcanism	MN14-01-32-1	198862	3.06864e+06	Matrix glass, corrected	Aphyric		Taracsák et al. (2019)	43.0638	14.0993	3.74141	9.58173	12.9483	5.63764	12.8525	3.55368	0.920348	0.197523	4.26683	0.686524	0.0684341	8.81201e-05					797.843	240.78		18.373			31.0807					292.484		53.2311	40.2888	83.7523	10.1388	48.5334	10.4852	3.46234	9.23037	1.45357	7.28838	1.17915
Rift Volcanism	TDE14-02-12-3	214356	3.0817e+06	Matrix glass, corrected	Aphyric		Taracsák et al. (2019)	44.1302	14.5807	3.4624	8.86719	11.9827	4.73916	10.9811	3.90785	1.6735	0.205862	4.74379	1.03972	0.0802183	3.73034e-05					1076.01	478.029		37.2392			39.9195					413.392		88.7093	67.9376	152.305	19.1087	85.3685	15.7513	5.2286	14.6637	2.26937	11.1255	1.70039
Rift Volcanism	TDE14-02-16-2	214356	3.0817e+06	Matrix glass, corrected	Aphyric		Taracsák et al. (2019)	45.2013	15.7568	3.23521	8.28535	11.1964	4.35036	10.5795	3.6618	1.60322	0.199408	4.5017	1.0174	0.0718506	0.000415429					978.446	511.547		38.6889			42.4595					390.888		88.8822	66.4268	148.852	18.9261	83.6495	16.1517	5.61769	16.4559	2.89177	12.0878	1.75977
Rift Volcanism	TSG14-01-9-1/2	198458	3.07103e+06	Matrix glass, corrected	Aphyric		Taracsák et al. (2019)	47.886	15.3117	2.90977	7.45191	10.0702	3.78629	7.95595	4.60385	2.70305	0.154312	4.11105	1.27378	0.0887706	0.000982939					1146.12	591.276		63.5984			47.165					601.523		133.604	103.408	209.074	24.4484	103.886	19.832	6.26533	18.4035	2.38686	12.1701	2.03161
Rift Volcanism	TSG14-02c-31-1	198394	3.07124e+06	Matrix glass, corrected	Aphyric		Taracsák et al. (2019)	44.757	14.8738	3.42636	8.77489	11.858	4.66156	10.0813	4.30963	1.81097	0.169688	4.78298	0.963882	0.0898922	0					1089.29	458.127		45.9762			40.049					457.555		98.4203	85.1469	171.516	19.4348	86.2603	15.7951	4.7473	15.8541	2.07975	10.329	1.68907
Rift Volcanism	WH14-01-10-3	198394	3.07335e+06	Matrix glass, corrected	Aphyric		Taracsák et al. (2019)	49.1848	12.9088	2.74804	7.03772	9.51044	4.27254	11.7496	4.40088	2.29494	0.226057	3.98612	1.92874
Rift Volcanism	WH14-01-10-4	198394	3.07335e+06	Matrix glass, corrected	Aphyric		Taracsák et al. (2019)	51.1072	17.7032	2.40043	6.1475	8.30743	2.27266	8.22487	5.59949	2.1553	0.216706	2.71228	1.59772
Rift Volcanism	TSG14-02cb-15-3	198394	3.07124e+06	Matrix glass, corrected	Aphyric		Taracsák et al. (2019)	43.7639	14.723	3.58319	9.17654	12.4007	4.63338	10.4373	4.44772	1.75656	0.200872	4.91498	0.967472
Submarine Sample	133DS8	222360	3.08711e+06	Glass, Dredged rock (lava or pillow)	Aphyric		[13198]	44.13	14.15			12.34	5.24	11.69	3.87	1.37	0.19	4.67	0.82
Submarine Sample	136DS2	223142	3.07822e+06	Glass, Dredged rock (lava or pillow)	Aphyric		[13198]	42.45	14.34			12.49	5.3	12.01	3.82	1.04	0.21	4.58	0.73
Submarine Sample	138DS1			Glass, Dredged rock (lava or pillow)	Aphyric		[13198]	43.18	15.02			11.34	4.94	10.63	4.32	1.67	0.19	4.6	1.44
Submarine Sample	139DS11	223951	3.07043e+06	Glass, Dredged rock (lava or pillow)	Aphyric		[13198]	42.63	15.02			13.1	5.32	12.03	3.81	1.05	0.19	4.28	0.75
Submarine Sample	139DS17	223951	3.07043e+06	Glass, Dredged rock (lava or pillow)	Aphyric		[13198]	42.33	14.73			12.6	5.27	11.72	3.96	1.07	0.21	4.17	0.76
Submarine Sample	141DS1-7	207585	3.08746e+06	Glass, Dredged rock (lava or pillow)	Aphyric		[13198]	43.77	14.3			11.87	6.01	13.05	3.62	1.24	0.21	3.98	0.72
Submarine Sample	142DS9	203618	3.08644e+06	Glass, Dredged rock (lava or pillow)	Aphyric		[13198]	44.6	14.23			12.84	4.93	11.14	3.61	1.38	0.18	5.25	0.71
Submarine Sample	146DS2-3	186295	3.06469e+06	Glass, Dredged rock (lava or pillow)	Aphyric		[13198]	44.01	14.06			12.26	6.36	12.47	3.27	0.75	0.19	3.74	0.72
Submarine Sample	146DS2-5	186295	3.06469e+06	Glass, Dredged rock (lava or pillow)	Aphyric		[13198]	44.77	14.32			12.55	6.21	12.61	3.27	0.74	0.2	3.75	0.51
Submarine Sample	146DS2-9	186295	3.06469e+06	Glass, Dredged rock (lava or pillow)	Aphyric		[13198]	44.26	14.93			11.99	4.8	11.16	4.02	1.58	0.18	4.69	0.81
Submarine Sample	146DS3-1	186295	3.06469e+06	Glass, Dredged rock (lava or pillow)	Aphyric		[13198]	44.82	14.22			12.26	6.11	12.53	3.13	0.71	0.21	3.76	0.49
Submarine Sample	147DS1	185365	3.06694e+06	Glass, Dredged rock (lava or pillow)	Aphyric		[13198]	42.55	14.33			13.16	4.69	11.26	3.81	1.36	0.16	4.77	0.68
Submarine Sample	147DS10	185365	3.06694e+06	Glass, Dredged rock (lava or pillow)	Aphyric		[13198]	42.96	14.7			13.14	5.32	12.47	4.01	1.1	0.16	4.02	0.75
Submarine Sample	147DS9	185365	3.06694e+06	Glass, Dredged rock (lava or pillow)	Aphyric		[13198]	43.6	14.43			12.93	4.97	10.97	4.3	1.42	0.18	4.74	1.05
Submarine Sample	148DS1	181476	3.06926e+06	Glass, Dredged rock (lava or pillow)	Aphyric		[13198]	45.11	15.02			11.7	4.68	10.49	4.12	1.69	0.2	4.94	0.87
Submarine Sample	148DS3	181476	3.06926e+06	Glass, Dredged rock (lava or pillow)	Aphyric		[13198]	43.86	14.52			11.45	4.89	10.8	3.69	1.67	0.2	4.99	1.29
Submarine Sample	149DS1	180460	3.06817e+06	Glass, Dredged rock (lava or pillow)	Aphyric		[13198]	44.73	14.41			12.28	6.09	12.67	3.33	0.73	0.17	3.78	0.51
Submarine Sample	149DS2	180460	3.06817e+06	Glass, Dredged rock (lava or pillow)	Aphyric		[13198]	43.79	14.33			12.28	5.28	12.15	3.64	1.53	0.19	4.9	0.78
Submarine Sample	149DS4	180460	3.06817e+06	Glass, Dredged rock (lava or pillow)	Aphyric		[13198]	45.85	15.87			11.64	4.76	10.58	4.06	1.44	0.17	3.47	0.53
Submarine Sample	151DS4	183652	3.07697e+06	Glass, Dredged rock (lava or pillow)	Aphyric		[13198]	42.42	13.93			12.99	5.47	12.23	4.09	1.63	0.2	5.06	0.81
Submarine Sample	152DS2	182637	3.07588e+06	Glass, Dredged rock (lava or pillow)	Aphyric		[13198]	45.08	15.02			11.39	4.67	10.9	3.89	1.88	0.21	4.61	0.96
Submarine Sample	152DS5	182637	3.07588e+06	Glass, Dredged rock (lava or pillow)	Aphyric		[13198]	44.47	15.51			11.54	4.75	10.92	4.29	1.63	0.21	4.7	1
Submarine Sample	154DS5	184551	3.07361e+06	Glass, Dredged rock (lava or pillow)	Aphyric		[13198]	43.13	14.25			12.35	5.87	13.22	3.53	1.02	0.18	4.04	0.67
Submarine Sample	668DS7	203900	3.0576e+06	Glass, Dredged rock (lava or pillow)	Aphyric		[13198]	44.78	13.73			13.48	5.21	11	3.71	1.01	0.21	4.01	0.75
Submarine Sample	9-16-3-01	207048	3065284	Dredged rock	Unknown		[12578]	43.77	14.36	13.97		13.97	6.95	10.27	3.13	1.4	0.18	4.22	0.9	0.8	0.02			21	111	967	446		38		133	34	177	45		336	366		69		137
Submarine Sample	10-16-3-0	207048	3065284	Dredged rock	Unknown		[12578]	41.25	11.22	14.87		14.87	12.13	11.51	2.72	1.04	0.18	4.1	0.86	0.3	0.02			15	296	853	297		24		119	27	587	61		363	317		58		70
Submarine Sample	11-16-3-01	207048	3065284	Dredged rock	Unknown		[12578]	44.68	15.95	12.29		12.29	5.37	9.99	3.88	1.82	0.18	3.87	1.11	0.8	0.02			25	37	1225	509		47		136	39	37	36		303	447		81		171
Submarine Sample	668-2	203565	3057419	Dredged rock	Unknown		[12578]	42.27	10.6	15.43		15.43	12.58	11.09	2.39	0.96	0.18	4.22	0.63	0.39	0.02			20	360	659	285	3.19	20		125	24.4	969	62		379	246		50.1	35.8	77.3	10	44.2	9.4	3.15	8.5	1.15	5.66	0.92
Submarine Sample	669-3	203703	3056306	Dredged rock	Unknown		[12578]	39.07	13.25	13.9		13.9	9.23	11.04	2.88	1.28	0.18	4.44	0.7	2.59	0.05			22	110	1380	384	10	29	12	122	36.4	215	52		377	428		119	88.6	159	17.1	63.3	12.1	4.12	10	1.44	7.44	1.34
Submarine Sample	136-2	223618	3077465	Dredged rock	Unknown	Basanite	Klügel et al. (2011)	41.98	13.96	14.65		14.65	7.2	11.65	3.04	0.97	0.18	4.17	0.77	1.31	0.13		143		102	805	277	3.69	18	2.67	114	28.8	124	54		380	274		60.8	43.9	97.2	12.5	54.1	12.4	3.66	10.5	1.38	7.21	1.28
Submarine Sample	141-1-19	207387	3086104	Dredged rock	Unknown	Basanite	Klügel et al. (2011)	42.69	12.13	13.7		13.7	11.95	10.68	2.89	1.03	0.19	3.2	0.73	0.71	0.03		116		303	820	255	6.64	22.1	3.47	103	26.7	496	63		306	368		62.1	59.5	116	13.9	56.9	11.5	3.31	9.22	1.22	6.67	1.16
Submarine Sample	142-9	203241	3084511	Dredged rock	Unknown	Basanite	Klügel et al. (2011)	42.29	9.62	15.41		15.41	13.47	11.47	1.88	0.73	0.18	3.94	0.55	0.77	0.08		103		312	525	236	3.73	14.6	2.12	108	25	488	75		332	205		42.7	37.2	78.7	10.1	45.4	10	3.03	8.74	1.18	6.18	1.15
Submarine Sample	148-9	181674	3070545	Dredged rock	Unknown	Basanite	Klügel et al. (2011)	41.75	11.28	15.26		15.26	11.7	9.88	2.67	1.19	0.18	4.31	0.76	0.84	0.03		97		292	787	359	5.75	25	3.26	119	28.3	356	68		348	309		64.5	55.2	119	15.5	67.6	14.1	4.04	10.7	1.44	7.54	1.29
Submarine Sample	149-1	180145	3068736	Dredged rock	Unknown	Basanite	Klügel et al. (2011)	42.58	13.81	14.34		14.34	7.29	10.72	3.35	1.44	0.19	4.36	0.9	1.19	0.05		81		101	941	436	6	30	3.76	123	35.1	168	52		362	314		76.3	57.8	126	15.9	68.2	15	4.29	11.4	1.57	8.41	1.48
Submarine Sample	151-5	183820	3077145	Dredged rock	Unknown	Basanite	Klügel et al. (2011)	41.24	11.65	14.89		14.89	10.03	11.74	3.14	1.27	0.18	4.36	0.8	0.6	0.02		112		191	906	329	6.16	27	3.99	120	28.4	384	59		376	359		80.9	57.2	119	14.7	62.5	12.4	3.67	10.2	1.34	7.02	1.19
Submarine Sample	178-1	195725	3060015	Dredged rock	Unknown	Basanite	Klügel et al. (2011)	41.57	14.74	13.76		13.76	5.32	10.95	3.73	1.59	0.2	4.19	1.55	1.27	0.13		38.3		27.6	1224	530.4	8.09	33.8	4.71	144	43.6	31.3	38.9		329	460		111	77.2	170	21.1	90.8	18	5.25	14.3	1.9	9.88	1.75
Submarine Sample	178-4	195725	3060015	Dredged rock	Unknown	Basanite	Klügel et al. (2011)	41.98	14.9	13.84		13.84	5.36	10.53	3.78	1.56	0.21	4.22	1.35	1.47	0.12		44.2		23.8	1198	544.4	8.05	35.8	4.71	147	43.5	16.3	40.5		323	458		113	78.4	171	21	89.9	18.1	5.1	13.9	1.86	9.88	1.7
2011-12 submarine eruption	H12110	204728	3.05859e+06	Floating pyroclasts - submarine eruption	Unknown	Restingolite	[17982]	69.19	15.76	0.73		0.73	0.31	0.48	6.09	4.88	0.01	0.22	0.07			1.19	9.71		2.08	90.44	237	5.53	42.98	7.26	21.54	9.98	5.65	1.1		0.99	436		72.51	29.23	77.76	7.19	23.85	4.14	0.76	2.63	0.39	2.13	0.37
2011-12 submarine eruption	EH2510−1	204728	3.05859e+06	Floating pyroclasts - submarine eruption	Unknown	Restingolite	[17982]	71.03	15.1	0.69		0.69	0.12	0.31	6.11	4.73	0.02	0.18	0.04			1.06	2.61		1.66	79.39	220	7.58	49.34	14.25	37.4	5.78	0.52	1.02		0.47	543		56.21	28.84	62.95	7.55	21.26	4.74	0.8	2.38	0.3	1.57	0.27
2011-12 submarine eruption	EH2110-2	204728	3.05859e+06	Floating pyroclasts - submarine eruption	Unknown	Restingolite	[17982]	68.61	15.43	0.71		0.71	0.55	0.47	6.52	4.78	0.02	0.21	0.05			1	6.43		10.3	135.03	212	6.93	48.29	7.14	38.01	4.67	1.11	0.63		1.51	496		56.05	34.57	85.16	7.99	25.52	4.15	0.82	2.49	0.3	1.56	0.22
2011-12 submarine eruption	EH-XP3	204728	3.05859e+06	Floating pyroclasts - submarine eruption	Aphyric	Restingolite-glass	[17982]	73.86	16.39					2.06	1.45	6.24
2011-12 submarine eruption	EH-XP4	204728	3.05859e+06	Floating pyroclasts - submarine eruption	Aphyric	Restingolite-glass	[17982]	74.62	17.53						2.37	5.47
2011-12 submarine eruption	EH-XP5	204728	3.05859e+06	Floating pyroclasts - submarine eruption	Aphyric	Restingolite-glass	[17982]	74.58	17.33						3.83	4.26
2011-12 submarine eruption	EH-XP9	204728	3.05859e+06	Floating pyroclasts - submarine eruption	Aphyric	Restingolite-glass	[17982]	75.75	17.41						2.39	4.44
2011-12 submarine eruption	EH-XP10	204728	3.05859e+06	Floating pyroclasts - submarine eruption	Aphyric	Restingolite-glass	[17982]	71.99	18.03						4.77	5.21
2011-12 submarine eruption	EH-XP11	204728	3.05859e+06	Floating pyroclasts - submarine eruption	Aphyric	Restingolite-glass	[17982]	63.34	18.01						11.66	7
2011-12 submarine eruption	EH-XP12	204728	3.05859e+06	Floating pyroclasts - submarine eruption	Aphyric	Restingolite-glass	[17982]	89.43	6.87						1.61	2.09
2011-12 submarine eruption	EH-XP13	204728	3.05859e+06	Floating pyroclasts - submarine eruption	Aphyric	Restingolite-glass	[17982]	100
2011-12 submarine eruption	EH-BASAN	204728	3.05859e+06	Floating pyroclasts - submarine eruption	Unknown	Lava Balloon (27 November 2011)	Pérez-Torrado et al. (2012)	42.36	13.39	14.73		14.73	7.36	10.64	3.75	1.46	0.19	4.75	0.83			-0.79
2011-12 submarine eruption	HB1	204728	3.05859e+06	Floating pyroclasts - submarine eruption	Unknown	Restingolite-Dark pumice	[17511]	44.65	13.51			12.6	5.56	10.34	4.42	1.14	0.21	4.64	0.88				71.2	25.9	41.2	1079	291	6.68	37.6	4.25	151	36.7	23.3	37.1	16.4	261	414	2.84	78.1	66.9	135	16.3	64.9	12.5	3.83	10.2	1.37	6.99	1.25
2011-12 submarine eruption	HB2	204728	3.05859e+06	Floating pyroclasts - submarine eruption	Unknown	Lava Balloon	[17511]	43.05	14.09			12.7	6.91	11.06	5.49	1.71	0.37	4.83					68.3	23.5	74.9	982	286	5.81	34.3	3.67	140	33.2	123	82	20.1	277	376	2.45	72.1	59.7	121	14.7	59.2	11.6	3.57	9.49	1.28	6.57	1.18
2011-12 submarine eruption	HB3	204728	3.05859e+06	Floating pyroclasts - submarine eruption	Unknown	Lava Balloon	[17511]	41.88	14.17			13.82	7.17	11.16	4.54	1.57	0.25	4.73					77.2	25.7	96.9	993	402	5.69	35.5	4.28	146	37.1	297	45.3	22.33	338	426	2.67	72.7	62.6	132	16.6	69.4	13.9	4.32	11.6	1.47	8.39	1.41
2011-12 submarine eruption	HB4	204728	3.05859e+06	Floating pyroclasts - submarine eruption	Unknown	Lava Balloon	[17511]	43.36	13.88			13.45	7.31	10.5	3.97	1.55	0.2	4.59	0.92			0.25	69.8	23.5	80.2	901	367	5.14	30.7	3.69	134	33.1	179	40.2	20.2	302	391	2.48	66.7	57.3	120	15.1	62.6	12.4	3.99	10.6	1.36	7.58	1.27
2011-12 submarine eruption	HB5	204728	3.05859e+06	Floating pyroclasts - submarine eruption	Porphyritic	Lava Balloon	[17511]	40.13	13.6			17.07	7.6	10.53	3.28	1.49	0.19	4.87	0.78			0.5	72.9	20.5	89.9	707	261	5.07	26.9	3.13	130	24.6	154	61.9	19.4	298	331	2.03	50.4	50.2	104	12.9	52.8	11	3.37	9.09	1.21	6.36	1.11
2011-12 submarine eruption	HB6	204728	3.05859e+06	Floating pyroclasts - submarine eruption	Unknown	Lava Balloon	[17511]	42.84	13.43			13.34	7.83	10.99	3.89	1.46	0.19	4.74	0.84			0.43	80	26.2	59.6	1117	410	5.97	35.6	4.79	154	37.9	110	80.3	24.4	321	426	2.81	80.3	65.3	138	17.4	71.3	14.3	4.4	11.9	1.51	8.39	1.38
2011-12 submarine eruption	HB6 (Ash)	204728	3.05859e+06	Floating pyroclasts - submarine eruption	Unknown	Lava Balloon	[17511]	43.76	14.36			12.85	6.25	10.97	4.1	1.59	0.2	4.68	0.95			0.6	87.6	25.7	114	1060	381	5.6	34.5	3.89	154	35.9	217	81.7	26.5	342	396	2.59	73.9	59.8	126	15.9	66.1	13.5	4.13	11.2	1.44	7.78	1.31
2011-12 submarine eruption	HB8	204728	3.05859e+06	Floating pyroclasts - submarine eruption	Unknown	Lava Balloon	[17511]	42.47	13.56			12.17	8.66	10.49	6.02	1.56	0.42	4.7					86.9	22.5	141	831	379	4.5	27.9	3.12	130	30.8	354	46	24.8	337	359	2.19	61.3	49.3	104	13.2	56.1	11.5	3.68	9.74	1.28	6.98	1.18
2011-12 submarine eruption	HB9	204728	3.05859e+06	Floating pyroclasts - submarine eruption	Unknown	Lava Balloon	[17511]	42.87	12.98			13.61	8.67	11.18	3.51	1.39	0.188	4.77	0.786			0.74	93.8	23.6	154	865	371	4.76	28.6	3.38	136	31.9	374	49.3	26.1	361	379	2.31	63.8	52.1	110	14	59.4	12	3.87	10.3	1.33	7.32	1.24
2011-12 submarine eruption	HB10	204728	3.05859e+06	Floating pyroclasts - submarine eruption	Unknown	Lava Balloon	[17511]	42.86	13.05			13.65	8.6	11.16	3.55	1.4	0.189	4.78	0.79			0.61	103	25.8	166	951	371	5.06	31.4	3.64	151	34.8	340	53.6	29	399	403	2.52	68.4	55.2	118	14.9	63.7	13.1	4.16	11.1	1.42	8.01	1.33
2011-12 submarine eruption	HB11	204728	3.05859e+06	Floating pyroclasts - submarine eruption	Unknown	Lava Balloon	[17511]	43.02	13.03			13.62	8.6	11.29	3.5	1.4	0.189	4.78	0.78			0.65	103	22.2	142	823	371	4.43	26.8	3.11	129	30.3	329	46.5	24.9	345	355	2.19	59.9	48.4	103	13.03	55.05	11.2	3.62	9.62	1.26	6.88	1.16
2011-12 submarine eruption	EH-1A	204728	3.05859e+06	Floating pyroclasts - submarine eruption	Unknown	Restingolite-White pumice	[16979]	67.7	16.6	1.54		1.54	0.51	0.54	6.74	3.64	0.02	0.22	0.06	0.72
2011-12 submarine eruption	EH-1B	204728	3.05859e+06	Floating pyroclasts - submarine eruption	Unknown	Restingolite-Dark pumice	[16979]	43.3	14.4	14.4		14.4	5.95	10.1	4.36	1.51	0.21	4.24	1.14	0.02
2011-12 submarine eruption	EH_15-10-11_BR	204412	3078658	Floating pyroclasts - submarine eruption	Unknown	Lava Balloon	[18397]	44.13	14.88		13.68	15.2022	5.97	10.01	4.16	1.63	0.21	4.26	1.07
2011-12 submarine eruption	EH_27-11-11_BR	204412	3078658	Floating pyroclasts - submarine eruption	Unknown	Lava Balloon	[18397]	43.4	13.84		13.32	14.8022	7.52	11.01	3.69	1.51	0.19	4.66	0.86
2011-12 submarine eruption	EH_06-12-11_BR	204412	3078658	Floating pyroclasts - submarine eruption	Unknown	Lava Balloon	[18397]	43.28	13.79		13.43	14.9244	7.72	10.96	3.62	1.49	0.19	4.68	0.84
2011-12 submarine eruption	EH_28-01-12_BR	204412	3078658	Floating pyroclasts - submarine eruption	Unknown	Lava Balloon	[18397]	43.16	13.28		13.31	14.7911	8.48	11.28	3.41	1.42	0.18	4.68	0.79
2011-12 submarine eruption	EH_15-10-11_GL	204412	3078658	Floating pyroclasts - submarine eruption	Aphyric	Matrix glass average	[18397]	45.1454	15.3673		11.9101	13.2354	4.77219	10.8077	4.65761	1.74571	0.181334	4.29522	1.11754	0.67			58.8497		12.3837	1184.33	504.211	7.16023	40.5379	5.85691	118.246	40.4737	-0.333391	31.3051		287.367	440.57		98.1244	69.3064	146.107	18.8319	78.0426	15.665	5.0703	13.273	1.85238	9.06359	1.50406
2011-12 submarine eruption	EH_31-10-11_GL	204412	3078658	Floating pyroclasts - submarine eruption	Aphyric	Matrix glass average	[18397]	44.8495	15.2458		11.9451	13.2743	4.7022	11.2485	4.58305	1.73706	0.181831	4.45275	1.05421	0.99			83.472		16.7007	1159.64	472.114	6.64048	41.3157	6.49233	153.949	39.4162	3.12713	31.9862		336.363	449.25		96.9494	66.9075	138.638	17.7283	71.5526	15.038	4.29775	12.3469	1.74787	8.71713	1.52531
2011-12 submarine eruption	EH_27-11-11_GL	204412	3078658	Floating pyroclasts - submarine eruption	Aphyric	Matrix glass average	[18397]	45.1767	15.5254		11.9503	13.2801	4.5122	10.3271	4.89665	1.99063	0.194598	4.29714	1.12926	0.54			93.2651		17.851	1162.08	436.463	7.21311	43.2272	5.34973	101.813	36.0382	1.26348	30.7096		287.474	463.702		101.798	66.8863	142.911	17.7634	71.6336	13.8859	4.5044	11.7348	1.61914	8.16363	1.38786
2011-12 submarine eruption	EH_06-12-11_GL	204412	3078658	Floating pyroclasts - submarine eruption	Aphyric	Matrix glass average	[18397]	44.8811	15.5485		11.9823	13.3156	4.69065	10.4457	4.85101	1.92218	0.179284	4.41314	1.08613	0.41			103.61		20.7411	1135.75	455.093	7.06361	42.455	5.77491	137.916	38.2479	2.31941	31.4899		304.313	453.259		98.7349	67.238	138.527	17.6484	70.2896	13.8428	4.32402	11.381	1.74542	8.42279	1.43126
2011-12 submarine eruption	EH_28-01-12_GL	204412	3078658	Floating pyroclasts - submarine eruption	Aphyric	Matrix glass average	[18397]	44.5744	15.4886		12.2519	13.6152	4.70998	10.1608	4.89112	1.9511	0.167818	4.71587	1.08837	0.47			116.838		21.9152	1075.56	445.273	6.9161	42.2693	5.03167	135.642	37.6956	1.39148	31.4941		297.935	446.094		96.5777	64.9288	135.592	17.2276	68.2099	13.4641	4.0681	11.8446	1.6932	8.3617	1.39186
2011-12 submarine eruption	EH-B	204728	3.05859e+06	Floating pyroclasts - submarine eruption	Unknown		[19650]	45.76	14.6	3.07	9.5	13.63	5.28	9.01	4.57	1.8	0.19	3.69	1.05			0.52	60	23	70	1098	484	6.6	36	6	140	34.9	30	34	16	288	569	3	86.8	67.7	141	15.7	64.2	12.9	3.9	11.5	1.5	7.5	1.3
2011-12 submarine eruption	EH-W	204728	3.05859e+06	Floating pyroclasts - submarine eruption	Unknown		[19650]	66.76	15.22	0.32	0.6	0.99	0.34	0.64	5.7	4.25	0.02	0.25	0.11			5.66	10	18	30	250	527	9.4	39	13	30	22.9	20	2	1	10	871	3	101	51.2	111	11.6	41.9	8.3	1	6.4	0.9	4.5	0.8
2011-12 submarine eruption	IGME_B1	204728	3.05859e+06	Floating pyroclasts - submarine eruption	Unknown		[19650]	43.62	13.96			14.65	6.28	10.18	4.18	1.58	0.19	4.33	1			0.04	66.3	27.4	57.5	1065	471	8.5	33	8.9	166	34.3	55.3	46.4	19.1	345	444	9.34	95.3	66.5	141	18	71	14.7	4.5	13.1	1.7	8.7	1.5
2011-12 submarine eruption	IGME_W1	204728	3.05859e+06	Floating pyroclasts - submarine eruption	Unknown		[19650]	71.17	15.63			0.81	0.11	0.84	5.77	4.31	0.04	0.25	0.05			1.02	20.6		7.33			12.9	44	6.8	57.8	23.4	9	2.13		5.14	2014	12.1		57.5	127	15.4	52.4	9.5	1.3	7.2	0.9	4.8	0.8
2011-12 submarine eruption	IGME_B2	204728	3.05859e+06	Floating pyroclasts - submarine eruption	Unknown		[19650]	43.47	13.95			14.76	6.34	10.12	4.23	1.55	0.19	4.35	0.99			0.04	74.5	27.1	113	1062	473	8.5	46	5.2	189	33.8	115	45.7	20.4	345	440	10.8	95.3	64.5	135	17.6	69.6	13.9	4.3	12.5	1.6	8.2	1.5
2011-12 submarine eruption	IGME_W2	204728	3.05859e+06	Floating pyroclasts - submarine eruption	Unknown		[19650]	70.76	14.74			1.37	0.42	1.23	5.77	4.14	0.04	0.4	0.09			1.04	27.8		13.7			11.7	47	6.6	51.9	25.7	9	4.3		16.4	1748	9.7		57.8	133	16.3	53.9	9.7	1.3	7.4	1	5.3	1
2011-12 submarine eruption	Basanita	204728	3.05859e+06	Floating pyroclasts - submarine eruption	Unknown	Basanite	Aparicio & Solana (2015)	47.96	15.68	9.95		14.2975	5.48	8.95	5.19	1.6	0.14	3.53	1.07						119	205	77		8		9	6	222	39		175				22	55
2011-12 submarine eruption	Basanita	204728	3.05859e+06	Floating pyroclasts - submarine eruption	Unknown	Basanite	Aparicio & Solana (2015)	47.07	15.4	10.16		15.1039	6.03	8.76	5.28	1.59	0.12	3.44	1.13
2011-12 submarine eruption	Riolita	204728	3.05859e+06	Floating pyroclasts - submarine eruption	Unknown	Rhyolite	Aparicio & Solana (2015)	70.38	15.59	0.97		15.1483		0.4	7.02	5.14		0.3							107	50	85	4	13			6	395	10		5	23			40	105
2011-12 submarine eruption	Riolita	204728	3.05859e+06	Floating pyroclasts - submarine eruption	Unknown	Rhyolite	Aparicio & Solana (2015)	72.45	15.74	0.5		14.1766		0.25	7.25	3.63
2011-12 submarine eruption	Riolita	204728	3.05859e+06	Floating pyroclasts - submarine eruption	Unknown	Rhyolite	Aparicio & Solana (2015)	70.33	14.13	3.26		14.2744			6.67	4.91
2011-12 submarine eruption	Riolita	204728	3.05859e+06	Floating pyroclasts - submarine eruption	Unknown	Rhyolite	Aparicio & Solana (2015)	75.42	1.16	2.27		13.9971			3.55	7.6
2011-12 submarine eruption	Traquita	204728	3.05859e+06	Floating pyroclasts - submarine eruption	Unknown	Trachyte	Aparicio & Solana (2015)	66.75	15.74	3.93		14.9007		0.95	8.6	4.03
2011-12 submarine eruption	Riolita	204728	3.05859e+06	Floating pyroclasts - submarine eruption	Unknown	Rhyolite	Aparicio & Solana (2015)	73.16	15.77	0.58		15.4398		0.41	6.36	4.05		0.16
2011-12 submarine eruption	2011-10-15	204728	3.05859e+06	Floating pyroclasts - submarine eruption	Unknown	Basanite	Meletlidis et al. (2015)	42.96	14.15	14.42		14.42	6.28	10.19	4.44	1.63	0.2	4.28	1			0.82		28		1118	425	7.03	39			38.3	50			341	440		83.9	69.1	153	18	73.2	15.1	4.5	11.3	1.59	8.18	1.36
2011-12 submarine eruption	2011-10-31	204728	3.05859e+06	Floating pyroclasts - submarine eruption	Unknown	Basanite	Meletlidis et al. (2015)	44.2	13.5	14.75		14.75	7.11	10.5	3.95	1.49	0.2	4.42	0.91			0.19		25.9		1075	428	6.63	38			35.3	140			355	395		84.5	61.5	128.5	15.6	64.6	13.8	4.37	11.7	1.54	7.96	1.36
2011-12 submarine eruption	2011-11-27	204728	3.05859e+06	Floating pyroclasts - submarine eruption	Unknown	Basanite	Meletlidis et al. (2015)	43.6	13.25	14.4		14.4	7.55	10.75	4.11	1.44	0.2	4.74	0.88			0.21		24.9		1025	413	6.53	35.9			34.6	180			367	382		81.1	58.3	122.5	14.9	62.5	13.2	4.27	11.65	1.54	7.7	1.33
2011-12 submarine eruption	2011-12-06	204728	3.05859e+06	Floating pyroclasts - submarine eruption	Unknown	Basanite	Meletlidis et al. (2015)	42.8	12.95	14.15		14.15	7.64	10.65	4.16	1.4	0.19	4.7	0.85			0.32		25.2		1025	401	6.09	35.4			34.1	210			378	371		79.8	56.4	118	14.45	61.7	13.1	4.26	11.6	1.57	7.81	1.36
2011-12 submarine eruption	2012-01-04	204728	3.05859e+06	Floating pyroclasts - submarine eruption	Unknown	Basanite	Meletlidis et al. (2015)	43.1	12.55	14.35		14.35	8.54	10.8	3.83	1.34	0.2	4.7	0.81			0.14		24.2		960	375	5.51	33			31.8	280			382	350		73.8	51.9	110	13.45	56.8	12.15	3.87	10.15	1.41	7.24	1.23
2011-12 submarine eruption	2012-01-18	204728	3.05859e+06	Floating pyroclasts - submarine eruption	Unknown	Basanite	Meletlidis et al. (2015)	42.2	12.2	14.45		14.45	8.43	10.65	4.17	1.28	0.18	4.5	0.73			1.08		23.5		916	354	5.25	31			30.6	290			373	328		70.4	48.7	103.5	12.5	53.6	11.75	3.75	10.45	1.37	6.98	1.21
2011-12 submarine eruption	2012-01-21	204728	3.05859e+06	Floating pyroclasts - submarine eruption	Unknown	Basanite	Meletlidis et al. (2015)	42.5	12.55	14.75		14.75	8.47	10.85	3.81	1.32	0.19	4.61	0.76			0.7		24.5		941	368	5.31	31.6			31.2	300			386	337		71.7	50.2	107.5	13	55.4	11.75	3.93	10.45	1.4	7.07	1.22
2011-12 submarine eruption	2012-01-28	204728	3.05859e+06	Floating pyroclasts - submarine eruption	Unknown	Basanite	Meletlidis et al. (2015)	43.1	12.15	14.35		14.35	8.67	10.75	3.83	1.3	0.19	4.76	0.77			0.49		24.1		932	369	5.24	31.1			31.2	290			385	336		71.3	49.5	104.5	12.95	54.4	11.9	3.88	10.3	1.43	7.23	1.2
2011-12 submarine eruption	2012-01-30	204728	3.05859e+06	Floating pyroclasts - submarine eruption	Unknown	Basanite	Meletlidis et al. (2015)	43.3	12.4	14.2		14.2	8.66	10.7	4.1	1.32	0.19	4.69	0.78			0.66		23.7		936	361	5.48	31.4			31.2	280			381	340		71.4	50.3	106.5	13	55	11.75	3.99	10.6	1.43	7.23	1.21
2011-12 submarine eruption	TRAC 1	204007	3062030	Floating pyroclasts - submarine eruption	Unknown	Trachyte	[19574]	62.3	16.55			15.0585	1.66	1.32	6.45	5.74	0.07	0.28	0.07			2.97				61.4	633	15.5	62.3			39.1	10			8	1035		121	115	194.5	18.6	58.3	8.36	1.65	6.31	0.98	5.99	1.22
2011-12 submarine eruption	TRAC 2	204007	3062030	Floating pyroclasts - submarine eruption	Unknown	Trachyte	[19574]	60	18.15			15.2854	0.71	2.63	7.4	3.62	0.18	0.81	0.15			2.06				861	934	23.8	129.5			35.8	10			36	852		204	128.5	216	20.7	66.8	10.5	3.15	7.99	1.23	6.44	1.22
2011-12 submarine eruption	2.7			Olivine-hosted melt inclusion, corrected	Melt Inclusion		Longpré et al. (2017)	43.0077	14.4636		13.7926	15.3273	6.09655	10.6566	4.43641	1.58372	0.180996	4.75115	1.03067	0.529136	62.5978		101.598		75.9271	970.242	352.14	4.36724	27.3585	3.44453	127.979	32.1712	13.485	35.5141	21.6238	166.674			86.7419	49.4293	111.758	14.0146	46.9928	10.7376	3.51673	8.621	1.51282	7.18181	0.910061
2011-12 submarine eruption	2.44			Olivine-hosted melt inclusion, corrected	Melt Inclusion		Longpré et al. (2017)	42.8362	14.6089		13.8559	15.3977	5.66135	10.9858	4.53411	1.54053	0.203125	4.73724	1.03674	0.691497	718.862
2011-12 submarine eruption	2.35a			Olivine-hosted melt inclusion, corrected	Melt Inclusion		Longpré et al. (2017)	42.7142	14.0423		13.5993	15.1126	7.1197	11.3406	4.1214	1.45692	0.110601	4.58191	0.912963	2.43911	3080.92		74.0162		94.9434	862.481	345.53	3.94112	30.874	3.40685	98.43	27.7603	24.0233	31.6466	25.8581	203.325			73.4097	45.9347	99.9426	12.8409	54.9281	11.679	3.65788	8.67526	1.40551	5.00331	1.03639
2011-12 submarine eruption	2.35b			Olivine-hosted melt inclusion, corrected	Melt Inclusion		Longpré et al. (2017)	44.4966	14.9739		12.7014	14.1148	6.13611	9.68108	4.78325	1.80214	0.160815	4.18924	1.07545	0.397232	130.264
2011-12 submarine eruption	2.8			Olivine-hosted melt inclusion, corrected	Melt Inclusion		Longpré et al. (2017)	42.8505	14.6388		13.9842	15.5403	5.81349	10.2784	4.43579	1.58687	0.199113	5.2061	1.00663	0.657382	77.0861		120.859		64.1999	1092.75	397.333	5.62533	37.3662	4.53785	129.299	34.7467	8.94112	33.9501	16.735	175.179			95.1421	61.5283	127.549	16.3278	66.9066	13.2636	4.40652	10.9373	1.43087	7.63934	1.28938
2011-12 submarine eruption	2.36			Olivine-hosted melt inclusion, corrected	Melt Inclusion		Longpré et al. (2017)	44.1306	14.931		13.0195	14.4682	5.80132	10.1179	4.77495	1.70994	0.162851	4.25624	1.09573	0.516679	177.942
2011-12 submarine eruption	4.1			Olivine-hosted melt inclusion, corrected	Melt Inclusion		Longpré et al. (2017)	43.6962	13.6393		12.8659	14.2975	7.33079	11.5063	3.84783	1.46053	0.0995129	4.70023	0.853399	2.27171	835.478		72.613		90.3736	793.13	351.526	4.25817	28.5886	3.15523	89.1368	29.3591	72.1792	28.2858	28.017	254.804			65.5818	44.6578	93.3981	12.2345	50.9314	11.1021	3.53728	9.69459	1.31801	6.87514	1.16226
2011-12 submarine eruption	1.12			Olivine-hosted melt inclusion, corrected	Melt Inclusion		Longpré et al. (2017)	43.2992	14.4465		13.5915	15.1039	5.73114	11.1657	4.35466	1.51925	0.173945	4.76992	0.948151	1.11375	371.922
2011-12 submarine eruption	1.14a			Olivine-hosted melt inclusion, corrected	Melt Inclusion		Longpré et al. (2017)	43.3275	14.3373		13.6315	15.1483	5.76447	11.3932	4.34874	1.48109	0.143785	4.5971	0.975324
2011-12 submarine eruption	1.14b			Olivine-hosted melt inclusion, corrected	Melt Inclusion		Longpré et al. (2017)	44.4864	14.7082		12.7571	14.1766	5.41367	10.9128	4.66183	1.63737	0.182935	4.12207	1.11771
2011-12 submarine eruption	1.43a			Olivine-hosted melt inclusion, corrected	Melt Inclusion		Longpré et al. (2017)	43.7147	14.5173		12.8451	14.2744	7.07721	10.6465	4.22462	1.49264	0.0995091	4.39649	0.986045	3.04653	3419.07		65.8315		161.51	972.821	370.091	4.34959	36.5882	3.52586	98.0329	31.6425	23.2668	34.9467	21.3827	197.806			83.9182	54.0879	122.084	14.8192	59.0091	12.0433	3.75018	11.5249	1.13846	7.56182	1.23554
2011-12 submarine eruption	1.4			Olivine-hosted melt inclusion, corrected	Melt Inclusion		Longpré et al. (2017)	44.7359	14.6295		12.5956	13.9971	5.65945	10.4596	4.65741	1.57492	0.123621	4.50465	1.05933	1.29795	159.617
2011-12 submarine eruption	1.51			Olivine-hosted melt inclusion, corrected	Melt Inclusion		Longpré et al. (2017)	43.2685	14.4282		13.4087	14.9007	5.50646	11.579	4.23064	1.64078	0.230232	4.6911	1.01644	2.60913	2781.99
2011-12 submarine eruption	1.13			Olivine-hosted melt inclusion, corrected	Melt Inclusion		Longpré et al. (2017)	42.8962	14.4804		13.8938	15.4398	5.68658	11.2434	4.2144	1.62804	0.182011	4.8268	0.948266	2.53412	1430.95		59.4613		64.2118	1012.55	444.033	6.72647	31.2733	3.53239	130.889	37.0288	11.8624	38.809	25.0171	194.615			88.3506	57.9719	125.147	15.912	69.356	9.2128	3.65896	11.7165	1.3271	10.5562	1.14225
2011-12 submarine eruption	4.31			Olivine-hosted melt inclusion, corrected	Melt Inclusion		Longpré et al. (2017)	43.6309	14.3486		13.4732	14.9725	5.87878	11.4298	4.34046	1.43073	0.141766	4.30226	1.02353
2011-12 submarine eruption	2.38a			Olivine-hosted melt inclusion, corrected	Melt Inclusion		Longpré et al. (2017)	42.2988	14.0952		13.9131	15.4613	6.36835	11.521	4.24758	1.56971	0.150837	4.88612	0.94927	1.21128	1832.72
2011-12 submarine eruption	4.5a			Olivine-hosted melt inclusion, corrected	Melt Inclusion		Longpré et al. (2017)	42.3737	14.0401		14.0951	15.6635	6.00081	11.5641	4.11518	1.57185	0.247394	5.12487	0.866884	2.59229	1283.51		98.0533		84.1563	825.691	357.706	4.67	31.9995	3.49026	108.525	30.9107	7.0577	40.5225	28.9743	251.171			77.019	47.556	104.314	12.992	56.8337	11.6957	3.59502	9.84207	1.3218	6.61601	1.09446
2011-12 submarine eruption	8.4			Olivine-hosted melt inclusion, corrected	Melt Inclusion		Longpré et al. (2017)	42.8269	15.0382		13.8152	15.3525	5.60199	10.8973	4.54012	1.6622	0.233291	4.43252	0.952268	0.605771	174.784		132.727		69.2755	1057.85	444.639	6.4178	33.4528	3.58965	123.898	37.8759	3.93133	42.3545	18.4699	188.212			85.7067	59.9663	118.83	15.5922	67.1742	13.711	4.1287	11.1465	1.58319	7.81091	1.58185
2011-12 submarine eruption	7.2			Olivine-hosted melt inclusion, corrected	Melt Inclusion		Longpré et al. (2017)	43.1975	14.4518		13.6381	15.1557	6.59697	10.1131	4.55986	1.64899	0.221206	4.66041	0.911972	0.645169	3357.53
2011-12 submarine eruption	7.27			Olivine-hosted melt inclusion, corrected	Melt Inclusion		Longpré et al. (2017)	41.3353	15.1662		14.5463	16.1649	6.36902	10.6248	4.62388	1.70692	0.113661	4.51022	1.00384	0.760432	1810.11
2011-12 submarine eruption	8.27			Olivine-hosted melt inclusion, corrected	Melt Inclusion		Longpré et al. (2017)	43.0774	14.1832		13.4351	14.93	6.69697	11.4163	4.07489	1.53424	0.159859	4.57457	0.847552	2.63792	2903.96		70.5349			854.324	391.404	4.92118	26.5952	2.26786	107.765	34.9243	25.3584	52.9221	28.6508	191.012			65.8948	49.1714	93.3471	11.4101	54.23	11.5906	3.59529	9.93028	1.39517	5.87618	1.27662
2011-12 submarine eruption	8.49			Olivine-hosted melt inclusion, corrected	Melt Inclusion		Longpré et al. (2017)	43.2453	14.3608		13.5507	15.0585	6.08999	10.6809	4.8925	1.68211	0.153833	4.35861	0.985338	0.383479	73.8771		64.3587		43.2563	1077.57	406.238	5.80579	35.368	4.16594	121.138	35.7626	4.18596	27.5804	15.9548	150.59			87.4307	59.3413	119.991	15.6569	65.1668	13.9347	3.77266	11.2833	1.54983	7.16909	1.28791
2011-12 submarine eruption	7.9			Olivine-hosted melt inclusion, corrected	Melt Inclusion		Longpré et al. (2017)	42.5952	13.1181		13.7548	15.2854	6.1468	13.2368	4.15082	1.48718	0.192056	4.75313	0.565107	0.764032	2610.55
2011-12 submarine eruption	7.3			Olivine-hosted melt inclusion, corrected	Melt Inclusion		Longpré et al. (2017)	42.0594	14.2243		14.1262	15.6981	6.08737	11.6186	4.16954	1.57288	0.23734	5.00425	0.900081	1.01087	327.293		35.5188		79.5528	918.293	424.057	4.69043	28.743	2.87359	98.5317	38.2867	19.0802	34.4286	28.0053	200.105			73.1941	52.0636	100.143	13.2795	61.4655	11.7017	3.66289	11.0009	1.2962	8.46481	1.29468
2011-12 submarine eruption	4.5b			Olivine-hosted melt inclusion, corrected	Melt Inclusion		Longpré et al. (2017)	42.6117	14.2002		13.9792	15.5348	5.74605	11.5756	4.42267	1.52551	0.243357	4.70424	0.99153	1.2373	588.378		114.794		128.001	1069.12	424.317	6.14708	30.6334	3.97635	151.14	36.616	11.0485	48.4153	24.7115	245.122			87.1808	62.8542	132.013	16.5458	66.783	13.8576	4.07462	12.3011	1.64881	8.02247	1.48744
2011-12 submarine eruption	1.15			Olivine-hosted melt inclusion, corrected	Melt Inclusion		Longpré et al. (2017)	43.7693	14.4973		13.1349	14.5965	5.21444	12.0293	4.38608	1.60042	0.134709	4.13476	1.09878	2.67033	1735.3		52.6142		127.543	976.667	445.44	4.32152	29.2295	3.30237	118.092	39.0672	11.5327	36.449	22.3345	177.143			81.2356	57.8145	113.105	14.8068	66.5321	10.9262	3.81523	14.136	1.40107	6.34544	1.4889
2011-12 submarine eruption	1.5			Olivine-hosted melt inclusion, corrected	Melt Inclusion		Longpré et al. (2017)	43.3733	14.3087		13.4001	14.8912	5.79605	11.6263	4.3875	1.45278	0.158851	4.481	1.01544	0.599132	480.659
2011-12 submarine eruption	1.43b			Olivine-hosted melt inclusion, corrected	Melt Inclusion		Longpré et al. (2017)	44.2119	14.4676		12.891	14.3254	5.93358	10.8911	4.4228	1.54999	0.238228	4.37555	1.01825	0.82963	107.883
2011-12 submarine eruption	2.31			Olivine-hosted melt inclusion, corrected	Melt Inclusion		Longpré et al. (2017)	43.8557	14.4621		13.133	14.5944	6.5585	10.1363	4.34385	1.69994	0.167883	4.66152	0.981162	0.554241	72.7698		92.4139		49.9702	1040.07	385.645	5.00198	36.4838	4.2135	123.43	32.5261	6.70367	28.084	17.2571	159.615			88.5503	58.3702	125.044	15.4727	61.5889	11.9924	3.90511	10.9085	1.34089	6.88967	1.17344
2011-12 submarine eruption	2.38b			Olivine-hosted melt inclusion, corrected	Melt Inclusion		Longpré et al. (2017)	42.4262	14.374		13.9278	15.4776	6.40968	11.4025	4.25871	1.56169	0.141789	4.54229	0.955319	1.7864	2464.38		84.423		94.1357	878.478	397.632	4.33978	32.9874	3.14594	102.409	34.7656	15.3641	32.2215	27.4213	200.734			75.0772	49.0082	99.126	12.6729	56.1513	11.4142	3.54899	10.4482	1.29941	6.59977	1.07779
NOTES:
LOI: Loss On Ignition.
PEC_percent: extent (%) of post-entrapment crystallisation and diffusive re-equilibration correction applied to melt inclusion compositions (Longpré et al., 2017; Taracsák et al., 2019). Data were filtered to PEC_percent values below 10%, which were the vast majority in both datasets (all but 2 from Longpré et al., 2017; all but 5 from Taracsák et al., 2019).
Samples in bold font are new analyses presented in this study.
*Inferred coordinates from location descriptions in the literature.
**Caldera is a Canarian local name related to a deep crater formed during a hydromagmatic eruption (not necessarily a 'caldera' as typically defined in volcanology).
***Later work by V. Villasante suggested this eruption was older than suggested by Hernández-Pacheco (1982).
For the samples from Carracedo et al. (2001) , Georoc code: [12930], the values listed in the H2O column represent H2O+CO2.
CITATIONS (column H) for samples sourced from GeoRoc [numbered]:
[877] Pellicer M. J.: Behavior Of Minor Elements And Partial Melting Model For The Lava Of Hierro, Canary Islands Bol. Real Sociedad Espanola Historia Natural, Secc. Geol. 78[1980] 175-188
[893] Pellicer M. J.: Geochemical Study Of Volcanism On Hierro, Canary Islands Estudios Geol. (Madrid) 35[1979] 15-29
[6665] Lundstrom C. C., Hoernle K. A., Gill J. B.: U-Series Disequilibria In Volcanic Rocks From The Canary Islands: Plume Versus Lithospheric Melting Geochim. Cosmochim. Acta 67[2003] 4153-4177 Georem-Id: 426 Doi: 10.1016/S0016-7037(03)00308-9
[12578] Abratis M., Schmincke H.-U., Hansteen T. H.: Composition And Evolution Of Submarine Volcanic Rocks From The Central And Western Canary Islands Int. J. Earth Sci. (Geol. Rundschau) 91[2002] 562-582 Doi: 10.1007/S00531-002-0286-7
[12930] Carracedo J. C., Badiola E. R., Guillou H., De La Nuez J., Perez Torrado F. J.: Geology And Volcanology Of La Palma And El Hierro, Western Canaries Estudios Geol. (Madrid) 57[2001] 175-273 Doi: 10.3989/Egeol.01575-6134
[13198] Stroncik N. A., Klügel A., Hansteen T. H.: The Magmatic Plumbing System Beneath El Hierro (Canary Islands): Constraints From Phenocrysts And Naturally Quenched Basaltic Glasses In Submarine Rocks Contrib. Mineral. Petrol. 157[2009] 593-607 Doi: 10.1007/S00410-008-0354-5
[15056] Day J. M. D., Pearson D. G., Macpherson C. G., Lowry D., Carracedo J. C.: Evidence For Distinct Proportions Of Subducted Oceanic Crust And Lithosphere In Himu-Type Mantle Beneath El Hierro And La Palma, Canary Islands Geochim. Cosmochim. Acta 74[2010] 6565-6589 Georem-Id: 5600 Doi: 10.1016/J.Gca.2010.08.021
[16979] Sigmarsson O., Laporte D., Carpentier M., Devouard B., Devidal J. L., Marti J.: Formation Of U-Depleted Rhyolite From A Basanite At El Hierro, Canary Islands Contrib. Mineral. Petrol. 165[2013] 601-622 Georem-Id: 7628 Doi: 10.1007/S00410-012-0826-5
[17511] Marti J., Castro A., Rodriguez C., Costa F. G., Carasquilla S., Pedreira R., Bolos X.: Correlation Of Magma Evolution And Geophysical Monitoring During The 2011-2012 El Hierro (Canary Islands) Submarine Eruption J. Petrol. 54[2013] 1349-1373 Doi: 10.1093/Petrology/Egt014
[17982] Troll V. R., Klügel A., Longpre M.-A., Burchardt S., Deegan F. M., Carracedo J. C., Wiesmaier S., Kueppers U., Dahren B., Blythe L. S., Hansteen T. H., Freda C., Budd D. A., Jolis E. M., Jonsson E., Meade F., Harris C., Berg S. E., Mancini L. H., Polacci M., Pedroza K.: Floating Stones Off El Hierro, Canary Islands: Xenoliths Of Pre-Island Sedimentary Origin In The Early Products Of The O…
[18397] Longpre M.-A., Klügel A., Diehl A., Stix J.: Mixing In Mantle Magma Reservoirs Prior To And During The 2011-2012 Eruption At El Hierro, Canary Islands Geology 42[2014] 315-318 Doi: 10.1130/G35165.1
[19574] Del Moro S., Di Roberto A., Meletlidis S., Pompilio M., Bertagnini A., Agostini S., Ridolfi F., Renzulli A.: Xenopumice Erupted On 15 October 2011 Offshore Of El Hierro (Canary Islands): A Subvolcanic Snapshot Of Magmatic, Hydrothermal And Pyrometamorphic Processes Bull. Volcanol. 77 (53)[2015] Doi: 10.1007/S00445-015-0940-0
[19650] Rodriguez-Losada J. A., Eff-Darwich A., Hernandez L. E., Vinas R., Perez N., Hernandez P., Melian G., Martinez-Frias J., Romero-Ruiz M. C., Coello-Bravo J. J.: Petrological And Geochemical Highlights In The Floating Fragments Of The October 2011 Submarine Eruption Offshore El Hierro (Canary Island): Relevance Of Submarine Hydrothermal Processes J. Afr. Earth Sci. 102[2015] 41-49 Doi: 10.1…
[19712] Weis F. A., Skogby H., Troll G., Deegan F. M., Dahren B.: Magmatic Water Contents Determined Through Clinopyroxene: Examples From The Western Canary Islands, Spain Geochemistry Geophysics Geosystems 16[2015] 2127-2146 Doi: 10.1002/2015Gc005800
CITATIONS (column H) for samples not sourced from GeoRoc [not numbered]:
Aparicio, A., Hernán, F., Cubas, C. R., & Araña, V. (2003). Fuentes mantélicas y evolución del volcanismo canario. Estudios geológicos, 59(1-4), 5-13.
Aparicio, A. & Solana, C. (2015). Las rocas de la erupción del Hierro (Islas Canarias). Octubre-Diciembre 2011
Balcells, R. & Gómez, A. (1997). Memorias y mapas geologicos del Plan MAGNA a escala 1:25.000 de las Hojas correspondientes a la isla de El Hierro. Hoja de Valverde, Frontera, Sabinosa, La Restinga. IGME, Madrid
Hernández Gutiérrez, L.E. (2014). Caracterización geomecánica de las rocas volcánicas de las Islas Canarias. Tesis Doctoral, Universidad de La Laguna.
Hernández-Pacheco, A. (1982). Sobre una posible erupción en 1973 en la isla de El Hierro (Canarias).
IDOM (2008). Caracterización geoquímica y mineralógica de rocas volcánicas del proyecto hidraúlico de Gorona del Viento (Isla de El Hierro, Canarias): implicaciones geomecánicas. Proyecto Constructivo Balsa Superior Anejo nº 4 : Geología
Klügel, A., Longpré, M. A., García-Cañada, L., & Stix, J. (2015). Deep intrusions, lateral magma transport and related uplift at ocean island volcanoes. Earth and Planetary Science Letters, 431, 140-149.
Longpré, M. A., Stix, J., Klügel, A., & Shimizu, N. (2017). Mantle to surface degassing of carbon-and sulphur-rich alkaline magma at El Hierro, Canary Islands. Earth and Planetary Science Letters, 460, 268-280.
Meletlidis, S., Di Roberto, A., Cerdeña, I. D., Pompilio, M., Bertagnini, A., Benito-Saz, M. A., ... & Aparicio, S. S. M. (2015). New insight into the 2011–2012 unrest and eruption of El Hierro Island (Canary Islands) based on integrated geophysical, geodetical and petrological data. Annals of Geophysics, 58(5), S0546.
Pedrazzi, D., Becerril, L., Martí, J., Meletlidis, S., & Galindo, I. (2014). Explosive felsic volcanism on El Hierro (Canary Islands). Bulletin of Volcanology, 76(10), 863.
Perez-Torrado, F. J., Carracedo, J. C., Rodriguez-Gonzalez, A., Soler, V., Troll, V. R., & Wiesmaier, S. (2012). La erupción submarina de La Restinga en la isla de El Hierro, Canarias: Octubre 2011-Marzo 2012.
Taracsák, Z., Hartley, M. E., Burgess, R., Edmonds, M., Iddon, F., & Longpré, M. A. (2019). High fluxes of deep volatiles from ocean island volcanoes: Insights from El Hierro, Canary Islands. Geochimica et Cosmochimica Acta, 258, 19-36.
[truncated: 7 more columns]

## Sheet: G49224
Ubide, T., et al., 2021, Volcanic plumbing filters on ocean-island basalt geochemistry: Geology, v. 49, https://doi.org/10.1130/G49224.1

## Sheet: Table S2
Table S2. Location, textural characterization and major element composition (wt.%) of El Hierro samples from this study (lavas and dykes), classified by eruptive stage. Volume fractions of crystals >0.5 mm were point-counted and data cross-checked via image analysis of digitised thin sections (image anaysis results were within 10% of point-counted values).
El Hierro eruptive stage	Sample	Type	Texture	Volume fraction of crystals >0.5 mm	X (Coord.)	Y (Coord.)	Location details	SiO2	TiO2	Al2O3	Fe2O3T	MnO	MgO	CaO	Na2O	K2O	P2O5	TOTAL	Mg#
Tiñor Edificie	LDAEH3	Lava	Aphyric	-	211758	3077749	Lava associated to DAEH3 dyke	44.74	3.59	14.09	14.23	0.18	7.35	9.52	3.06	0.95	0.64	98.35	0.506012
	TIMPILL2	Lava	Porphyritic	2% Ol, 18% Pl, 1% Sp	212840	3075241	Timijiraque pillow lavas	45.94	3.794	15.2	14.403	0.198	4.279	10.007	3.409	1.112	0.729	99.071	0.370746
	DAEH3	Dyke	Porphyritic	19% Ol, 5% Cpx	212631	3078448	Feder Dyke La Caldereta	39.58	3.451	10.74	14.907	0.218	12.04	13.162	3.195	0.548	1.503	99.344	0.615645
	TIMBAS3	Lava	Porphyritic	15% Ol, 20% Cpx, 1% Sp	212840	3075241	Lava flow above Timijiraque pillow lavas	43.52	3.083	8.85	14.806	0.187	15.577	10.833	1.803	0.718	0.428	99.805	0.676003
El Golfo - Las Playas Edifice	MMPum	Pumice	Aphyric	-	200471	3070783	Malpaso pumice deposit	61.59	0.819	19.26	0	0.186	0.66	2.5	7.36	3.95	0.172	96.497	1
Rift Volcanism	DAEH2	Dyke	Porphyritic	1% Ol, 2% Cpx, 3% Sp	206475	3080874	Feder dyke Montaña de los Muertos	42.55	4.837	13.17	15.196	0.194	6.334	11.167	3.781	1.805	0.929	99.963	0.452544
	DAEH4	Dyke	Aphyric	-	189928	3073792	Feder dyke Montaña del Escobar	44.95	3.849	14.82	13.363	0.2	4.884	9.861	4.651	1.913	1.087	99.578	0.420231
	LDAEH2	Lava	Aphyric	-	206505	3080797	Lava associated to DAEH2 dyke	41.7	4.75	13.52	14.81	0.192	6.17	10.08	3.91	1.93	0.88	97.942	0.452419
	EHVD1	Lava	Aphyric	-	189405	3073025	Montaña los Charcos lower lava flow	45.66	3.41	16.32	11.33	0.189	4.24	8.99	4.47	2.01	1.23	97.849	0.426
	DAEH1	Dyke	Aphyric	-	206099	3061052	Feder dyke Montaña La Restinga	43.58	3.573	13.57	14.983	0.179	7.033	13.11	2.677	0.648	0.477	99.83	0.482107
	DAEH6	Dyke	Porphyritic	14% Ol, 2% Cpx	207463	3077995	Feder dyke Montaña Los Cascajos	43.78	3.35	13.03	13.99	0.179	9.17	10.76	3.34	0.88	0.59	99.069	0.565201
	LDAEH7	Lava	Porphyritic	2% Ol, 8% Cpx, 5% Sp	206030	3080249	Lava associated to DAEH7 dyke	42.01	4.83	13.52	14.95	0.191	6.26	10.34	3.75	1.91	0.91	98.671	0.453676
	LDAEH1	Lava	Porphyritic	14% Ol, 11% Cpx, 1% Pl, 3% Sp	206105	3061068	Lava associated to DAEH1 dyke	40.95	4.41	11.65	15.48	0.18	10.86	9.84	2.82	1.16	0.71	98.06	0.581817
	LDAEH5	Lava	Porphyritic	10% Ol, 7% Cpx	201830	3070059	Lava associated to DAEH5 dyke	40.59	4.03	10.37	15.2	0.19	12.09	10.91	2.72	1.19	0.77	98.06	0.612014
	DAEH5	Dyke	Porphyritic	21% Ol, 3% Cpx, 1% Sp	201814	3070079	Feder dyke Montaña del Guanche	41.52	4.066	10.06	15.196	0.185	12.26	11.893	2.887	1.119	0.796	99.982	0.615386
	LDAEH4	Lava	Porphyritic	14% Ol, 15% Cpx, 5% Sp	190164	3073693	Lava associated to DAEH4 dyke	41.05	4.29	10.16	16.34	0.175	13.09	10.31	2.35	0.91	0.5	99.175	0.61371
Fe2O3T: total Fe expressed as Fe2O3
Mg# = Mg/(Mg+FeT), where concentrations are expressed on a molar basis and FeT represents total iron
Ol olivine; Cpx clinopyroxene; Pl plagioclase; Sp spinel (titanomagnetite)

## Sheet: Table S3
Table S3. Selected analyses of olivine, clinopyroxene, plagioclase, Cr-titanomagnetite (literature data), and aphyric whole rock with ca. 5 wt.% MgO (DAEH-4) to calculate crystal accumulation models, and for the MINSQ model (Table S4). Concentrations below detection limits (blank) were modelled as zero.
	Mineral Analysis						Aphyric Rock		Mineral Accumulation Model (Vectors)
Major oxide (wt. %) and trace element (ppm) concentrations	Olivine[1]	Clinopyroxene[2]	Plagioclase[3]	Cr-TiMag[3]			DAEH4[this study]		80% DAEH4 + 20% Olivine	80% DAEH4 + 20% Clinopyroxene	80% DAEH4 + 20% Plagioclase	95% DAEH4 + 5% Chr-TiMag
SiO2	39.9866	48.31	50.81	0.09			44.95		43.9573	45.622	46.122	42.707
TiO2		2.36	0.24	14.94			3.85		3.08	3.552	3.128	4.4045
Al2O3	0.033	5.64	30.29	8.15			14.82		11.8626	12.984	17.914	14.4865
Fe2O3T	16.8702	7.63494	0.911303	62.7799			13.36		14.062	12.215	10.8703	15.831
MnO	0.191756	0.1	0.01	0.35			0.2		0.198351	0.18	0.162	0.2075
MgO	44.8961	13.58	0.1	7.65			4.88		12.8832	6.62	3.924	5.0185
CaO	0.201333	22.06	13.28	0.05			9.86		7.92827	12.3	10.544	9.3695
Na2O		0.59	3.61	0.04			4.65		3.72	3.838	4.442	4.4195
K2O		0.01	0.3	0.01			1.91		1.528	1.53	1.588	1.815
P2O5			0.03	0			1.09		0.872	0.872	0.878	1.0355
Cr2O3	0.04	0.27	0	9.39			0		0.008	0.054	0	0.4695
NiO	0.19	0.02	0	0.11			0		0.038	0.004	0	0.0055
Li	2.58	0.77	n.a.	n.a.			n.a.
B	12.18	7.03	n.a.	n.a.			n.a.
Sc	4.72	55.28	n.a.	n.a.			10.6		9.424	19.536
Ti	n.a.	527.3	n.a.	n.a.			n.a.
V	n.a.	172.5	n.a.	n.a.			280.4			258.82
Cr	257.8	1853	n.a.	n.a.
Mn	1831	1136	n.a.	n.a.			n.a.
Co	98.48	29.62	n.a.	n.a.			33.7		46.656	32.884
Ni	1493	168.1	n.a.	n.a.					298.6	33.62
Zn	54.75	24.56	n.a.	n.a.			133.3		117.59	111.552
Ga	2.56	5.04	n.a.	n.a.			28.6		23.392	23.888
Rb		0.981	n.a.	n.a.			50.8		40.64	40.8362
Sr		32.93	n.a.	n.a.			1166.9		933.52	940.106
Y		7.82	n.a.	n.a.			40.6		32.48	34.044
Zr		14.45	n.a.	n.a.			484.8		387.84	390.73
Nb	1.13	0.59	n.a.	n.a.			106.8		85.666	85.558
Cs		0.14	n.a.	n.a.			n.a.
Ba		2.93	n.a.	n.a.			612.3		489.84	490.426
La	0.164	0.84	n.a.	n.a.			124.4		99.5528	99.688
Ce	0.95	4.02	n.a.	n.a.			172.3		138.03	138.644
Pr	0.066	0.77	n.a.	n.a.			n.a.
Nd	0.327	5.15	n.a.	n.a.			87.3		69.9054	70.87
Sm	0.272	1.98	n.a.	n.a.			18.6		14.9344	15.276
Eu	0.563	0.74	n.a.	n.a.			n.a.
Gd	0.093	2.33	n.a.	n.a.			n.a.
Tb	0.025	0.37	n.a.	n.a.			n.a.
Dy	0.174	2.25	n.a.	n.a.			n.a.
Ho	0.023	0.4	n.a.	n.a.			n.a.
Er	0.043	0.98	n.a.	n.a.			n.a.
Tm	0.02	0.14	n.a.	n.a.			n.a.
Yb	0.062	0.74	n.a.	n.a.			n.a.
Lu	0.028	0.12	n.a.	n.a.			n.a.
Hf			n.a.	n.a.			n.a.
Ta			n.a.	n.a.			n.a.
Pb			n.a.	n.a.			3.3		2.64	2.64
Th		0.057	n.a.	n.a.			9.8		7.84	7.8514
U		0.041	n.a.	n.a.			n.a.
[1] Olivine major elements from Gurenko et al. (2009; El Hierro basanite) and trace elements from Jeffries et al. (1995; Mauna Kea ankaramite, Hawaii)
[2] Clinopyroxene major elements from Weis et al. (2015; El Hierro ankaramite) and trace elements from Jeffries et al. (1995; Mauna Kea ankaramite, Hawaii)
[3] Plagioclase and spinel (Cr-titanomagnetite) major elements from Marti et al. (2013; El Hierro)
[this study] Groundmass composition approximated with the whole rock composition of aphyric sample DAEH4 from El Hierro (ca. 5 wt.% MgO; Table DR1)
n.a.: not analysed
blank: below detection limit

## Sheet: Table S4
Table S4. Fractions of recycled crystals and groundmass estimated via MINSQ least-squares modelling to reproduce the whole rock major element composition of porphyritic samples from El Hierro (Table S2). Groundmass compositions are approximated using aphyric samples with ca. 5-6 wt.% MgO. Mineral compositions are from El Hierro literature (same compositions as in those used for the accumulation v…
Sample	Volume fraction of crystals >0.5 mm	Groundmass represented by sample DAEH4 (4.88 wt.% MgO)	Olivine	Clinopyroxene	Plagiolcase	Cr-TiMagnetite	Residual SSQ*	Groundmass represented by sample LDAEH2 (6.17 wt.% MgO)	Olivine	Clinopyroxene	Plagiolcase	Cr-TiMagnetite	Residual SSQ*
TIMPILL2	2% Ol, 18% Pl, 1% Sp	95.5378	0	1.52331	3.74571	2.01668	2.91732	94.8236	0	0	10.8929	0	6.74221
DAEH3	19% Ol, 5% Cpx	60	10.221	21.016	0	5	11.8749	60	8.39557	25	0.139565	4.31032	6.11136
TIMBAS3	15% Ol, 20% Cpx, 1% Sp	60	21.7669	17.1739	0	2.63537	4.40496	60	20.164	21.3877	0	1.09591	1.23001
DAEH2	1% Ol, 2 % Cpx, 3% Sp	80.6177	0.188141	13.3733	0	5	0.967987	94.604	0	6.14759	0.24347	1.01581	0.270727
DAEH6	14% Ol, 2% Cpx	65.9941	8.12633	15.115	6.95151	3.95916	0.338496	77.4503	7.23755	9.84013	7.19742	0.437078	1.03399
LDAEH7	2% Ol, 8% Cpx, 5% Sp	82.4879	1.04496	8.99972	0.606984	5	0.960858	98.1626	0	1.73154	0.437996	0.43752	0.0232312
LDAEH1	14% Ol, 11% Cpx, 1% Pl, 3% Sp	68.2012	11.7516	12.3046	0	5	1.55999	73.0643	10.7449	9.4371	3.15365	3.35229	0.23565
LDAEH5	10% Ol, 7% Cpx	60	13.123	18.5442	0	5	1.91712	61.3708	11.6848	19.6229	1.83382	4.14655	0.160574
DAEH5	21% Ol, 3% Cpx, 1% Sp	60	12.3029	21.4231	0	5	3.01244	60.9017	10.4347	25	0.0141496	3.96785	0.313306
LDAEH4	14% Ol, 15% Cpx, 5% Sp	60	16.6481	16.4848	0	5	3.31901	63.7721	14.3787	17.4018	0.516318	4.93213	0.367269
MINSQ model abundances restrictions are 60 to 100% for groundmass, 0 to 25% for olivine, 0 to 25% for clinopyroxene, 0 to 20% for plagioclase, and 0 to 5% for Cr-titanomagnetite.
The vast majority of porphyritic samples are successfully modelled by mineral accumulation a shown by low residual SSQ values and mineral fractions similar to those observed in the samples (from Table DR2). In detail, crystal accumulation on a ca. 5 wt.% MgO groundmass (aphyric sample DAEH4) reproduces the fractions observed in porhyritic samples LDAEH7, LDAEH1 and LDAEH4; crystal accumulation on…
Slight variations between modelled and observed mineral abundances can be related to variations in the texture of sample aliquots used for the preparation of thin sections relative to those used for bulk rock analysis, as well as compositional deviations in the compositions of minerals (assumed constant in our models) and groundmass (modelled with a variation from 5-6 wt.% MgO using two aphyric c…

## Sheet: Table S5
Table S5. Thermodynamic modelling via Rhyolite-MELTS 1.2.0
Parameters of the Rhyolite-MELTS 1.2.0 model runs, and compositions of fractionated phases with sample LDAEH3 as the starting composition
Starting composition	Reference	Starting Pressure (MPa)	Final Pressure (MPa)	∆P	Tliquidus (ºC)	Initial Temperature (ºC)	Final Temperature (ºC)	∆T (ºC)	% H2O content	Buffer fO2	Supressed mineral phase	Fractionated phases (Temperature interval - ºC; compositional variation)
												Ol	Cpx	Sp	Fsp	Ap	Ilm	Wht	Grt
LDAEH3 El Hierro aphyric	This study	400	400	0	1183	1180	900	5	1	NNO	Opx	1180-1160; Fo#81-79	1165-900; Mg# 0.76-0.65	1155-900	1110-900	1100-900	1050-900	-	-	BEST-FIT MODEL
LDAEH3 El Hierro aphyric	This study	500	500	0	1191	1190	900	5	1	NNO	Opx	1185-1180; Fo#81-80	1185-900; Mg# 0.77-0.63	1165-900	1110-900	1110-900	1045-900	1120-1115	-
LDAEH3 El Hierro aphyric	This study	600	600	0	1204	1200	900	5	1	NNO	Opx	-	1200-900; Mg# 0.77-0.60	1175-900	1105-900	1115-900	1045-900	1140-1120	-
LDAEH3 El Hierro aphyric	This study	700	700	0	1224	1220	900	5	1	NNO	Opx	-	1220-915; Mg# 0.77-0.58	1180-915	1105-900	1120-900	1040-900	1160-1125	910-900
LDAEH3 El Hierro aphyric	This study	800	800	0	1240	1240	1095	5	1	NNO	Opx	ERROR at 1095ºC
Parameters of the Rhyolite-MELTS 1.2.0 model runs, and compositions of fractionated phases, from potential primary melts. Hawaiian primary melts were calculated from glass analyses to achieve equilibrium with mantle peridotite olivine (Clague et al., 1991; Sisson et al., 2009), and provide a better approximation to parental melt compositions than whole rock TIMBAS3, which is a cumulative composit…
Starting composition	Reference	Starting Pressure (Kbar)	Final Pressure (Kbar)	∆P	Tliquidus (ºC)	Initial Temperature (ºC)	Final Temperature (ºC)	∆T (ºC)	% H2O content	Buffer fO2	Supressed mineral phase		Fractionated phases (Temperature interval - ºC; compositional variation)
												Ol	Opx	Cpx	Grt	Wht	Rhm-Oxide	Ap	Sphene	Spinel	Fsp	Fluid	Biotite	Nepheline	Hornblende
Tholeitic Hawaii Primary MELT	Clague et al. (1991)	20	4.38	110	1610.35	1610	900	5	1	NNO	-	-	1610-900	1335-1025	1135-970	-	-	1100-900	-	1230-900	1025-900	-	-	-	-
Tholeitic Hawaii Primary MELT	Clague et al. (1991)	15	3.39	90	1545.51	1545	900	5	1	NNO	-	-	1545-900	1285-1035	-	-	-	1045-900	-	1210-900	1040-900	-	-	-	-
Tholeitic Hawaii Primary MELT	Clague et al. (1991)	10	3.73	55	1473.05	1475	900	5	1	NNO	-	-	1470-900	1240-1045	-	-	-	1025-900	-	1185-900	1050-900	-	-	-	-
Tholeitic Hawaii Primary MELT	Clague et al. (1991)	8	4.22	35	1441.6	1440	900	5	1	NNO	-	1315-1205	1440-900	1225-1005	-	-	905-900	1020-900	-	1175-910	1060-900	-	-	-	-	BEST-FIT MODEL
Tholeitic Hawaii Primary MELT	Clague et al. (1991)	8	4.045	35	1468.95	1465	900	5	0.5	NNO	-	-	1465-900	1260-1025	-	-	995-970	1080-900	-	1200-900	1125-900	-	-	-	-
A22 Alkaline Haawaii Primary MELT	Sisson et al. (2009)	20	4.32	140	1462.89	1460	900	5	1	NNO	-	1460-1025	-	1370-900	-	-	-	1245-900	-	1350-900	-	-	1020-900	950-900	-
A22 Alkaline Haawaii Primary MELT	Sisson et al. (2009)	15	4.4	100	1434.96	1430	900	5	1	NNO	-	1430-1055	-	1315-900	-	-	-	1205-900	-	1300-900	-	-	1005-900	955-900	-
A22 Alkaline Haawaii Primary MELT	Sisson et al. (2009)	10	4	60	1403.71	1400	900	5	1	NNO	-	1400-1090	-	1255-900	-	-	-	1165-900	-	1250-900	-	-	975-900	960-900	-
A22 Alkaline Haawaii Primary MELT	Sisson et al. (2009)	8	4.08	40	1390.04	1390	900	5	1	NNO	-	1385-1100	-	1235-900	-	-	-	1150-900	-	1230-900	-	-	960-900	960-900	-	BEST-FIT MODEL
A22 Alkaline Haawaii Primary MELT	Sisson et al. (2009)	10	3.82	60	1417.97	1415	900	5	0.5	NNO	-	1415-925	-	1275-900	-	1175-1155	-	1150-900	-	1260-900	-	-	920-900	1020-900	-
A22 Alkaline Haawaii Primary MELT	Sisson et al. (2009)	8	4	40	1404.49	1400	900	5	0.5	NNO	-	1400-920	-	1255-900	-	1155	-	1150-900	-	1240-900	-	-	915-900	1025-900	-
TIMBAS3 El Hierro cumulate	This study	20	4.27	130	1509.96	1505	900	5	1	NNO	-	1355-1200	1505-1080	1390-975	-	-	-	1220-900	-	1265-900	935-900	-	930-900	-	970-930
TIMBAS3 El Hierro cumulate	This study	15	4.1	100	1445.7	1445	900	5	1	NNO	-	1400-1200	1445-940	1340-970	-	-	-	1185-900	-	1230-900	970-900	-	945-900	-	945
TIMBAS3 El Hierro cumulate	This study	10	4	60	1400.39	1400	900	5	1	NNO	-	1395-1195	1140-915	1280-1020	-	-	-	1145-900	-	1195-900	1015-900	-	910-900	-	-
TIMBAS3 El Hierro cumulate	This study	8	4.12	40	1386.33	1385	900	5	1	NNO	-	1385-1185	1110-910	1250-1020	-	-	900	1130-900	-	1180-900	1025-900	-	905-900	-	-	BEST-FIT MODEL
Starting compositions used for the Rhyolite-MELTS 1.2.0 model runs, after normalization to 100 wt.% with the oxygen fugacity buffered to NNO and including H2O content
Starting composition	Reference								SiO2	TiO2	Al2O3	Fe2O3	FeO	MgO	CaO	Na2O	K2O	P2O5	H2O	TOTAL	Fe2O3T
LDAEH3 El Hierro aphyric	This study								45.663	3.6666	14.3905	2.4974	10.8165	7.4725	9.7229	3.1253	0.9703	0.6537	1.0213	100	14.5175
Tholeitic Hawaii Primary MELT	Clague et al. (1991)								48.2652	1.7571	10.1789	1.713	9.9848	16.9754	8.1861	1.5077	0.2696	0.1638	0.9986	100	12.8088
A22 Alkaline Haawaii Primary MELT	Sisson et al. (2009)								40.868	1.9485	11.6908	2.2585	9.9001	14.9883	10.8915	4.7863	1.269	0.3997	0.9992	99.9999	13.2602
TIMBAS3 El Hierro cumulate	This study								43.8036	3.1009	8.91	2.1924	11.441	15.6721	10.9033	1.8122	0.7249	0.4329	1.0068	100	14.9065
Liquid lines of decent (LLD) obtained from the Rhyolite-MELTS 1.2.0 model best-fit runs highlighted above with grey, orange, purple, and green background colours
MODEL	STEP	Liquid temperature (ºC)	Pressure (MPa)	log(10) fO2	liq mass (gm)	liq rho (gm/cc)	Crystal fraction	Viscosity (Pa·s)	SiO2	TiO2	Al2O3	Fe2O3	FeO	MgO	CaO	Na2O	K2O	P2O5	H2O	TOTAL	Fe2O3T
LDAEH3 El Hierro aphyric	1	1180	400	-7.796	99.9269	2.7312	0.0731429	5.44628	45.663	3.6666	14.3905	2.4974	10.8165	7.4725	9.7229	3.1253	0.9703	0.6537	1.0213	100	14.5175
	2	1175	400	-7.855	99.5049	2.7311	0.495068	5.84925	45.6898	3.6821	14.4515	2.502	10.7941	7.3227	9.7627	3.1385	0.9744	0.6564	1.0257	99.9999	14.4972
	3	1170	400	-7.915	99.0893	2.7309	0.910693	6.28348	45.7166	3.6976	14.5122	2.5065	10.7707	7.1748	9.8022	3.1517	0.9785	0.6592	1.03	100	14.4757
	4	1165	400	-7.975	97.668	2.7299	2.332	6.72822	45.7216	3.7195	14.6351	2.5143	10.8082	6.9926	9.7089	3.1932	0.9928	0.6688	1.045	100	14.5252
	5	1160	400	-8.035	95.257	2.7278	4.74295	7.20444	45.7232	3.7392	14.8165	2.5249	10.9056	6.7734	9.4772	3.265	1.0179	0.6857	1.0714	100	14.644
	6	1155	400	-8.096	89.2881	2.7019	10.7119	9.82879	46.6713	3.4805	15.2185	2.4072	10.2581	6.339	9.1993	3.4656	1.0859	0.7316	1.143	100	13.8068
	7	1150	400	-8.157	84.2008	2.6773	15.7992	13.3598	47.5904	3.2338	15.6051	2.2882	9.6191	5.9303	8.9351	3.6586	1.1515	0.7758	1.2121	100	12.9777
	8	1145	400	-8.219	80.0415	2.6557	19.9585	17.7542	48.4113	3.0176	15.9561	2.1788	9.0481	5.565	8.6863	3.8342	1.2114	0.8161	1.2751	100	12.2337
	9	1140	400	-8.281	76.5879	2.6366	23.4121	23.11	49.1461	2.8271	16.274	2.0788	8.5388	5.238	8.4517	3.9941	1.266	0.8529	1.3326	100	11.5677
	10	1135	400	-8.344	73.6734	2.6197	26.3266	29.5665	49.808	2.6581	16.5624	1.9873	8.0826	4.9434	8.2299	4.1403	1.3161	0.8866	1.3853	100	10.9693
	11	1130	400	-8.407	71.1768	2.6046	28.8232	37.2649	50.4087	2.5066	16.825	1.9034	7.6716	4.6766	8.0195	4.2746	1.3622	0.9177	1.4339	99.9998	10.4286
	12	1125	400	-8.471	69.0097	2.591	30.9903	46.3767	50.9578	2.3696	17.0652	1.8262	7.2992	4.4335	7.8193	4.3987	1.405	0.9465	1.4789	99.9999	9.93761
	13	1120	400	-8.535	67.107	2.5786	32.893	57.1084	51.4632	2.2447	17.2856	1.7547	6.9596	4.2107	7.6283	4.514	1.4449	0.9734	1.5209	100	9.48872
	14	1115	400	-8.599	65.4201	2.5674	34.5799	69.6787	51.9312	2.13	17.4887	1.6884	6.6483	4.0057	7.4456	4.6216	1.4821	0.9985	1.5601	100	9.07648
	15	1110	400	-8.664	63.5298	2.5563	36.4702	83.3489	52.4041	2.0277	17.5901	1.6275	6.3566	3.8465	7.2632	4.7243	1.5254	1.0282	1.6065	100	8.69142
	16	1105	400	-8.729	60.7793	2.5439	39.2207	95.8738	52.892	1.9603	17.5001	1.5743	6.0666	3.6983	7.1286	4.8346	1.5913	1.0747	1.6792	100	8.31595
	17	1100	400	-8.795	58.0468	2.5313	41.9532	111.686	53.4349	1.8857	17.4112	1.5261	5.8119	3.5383	6.947	4.9529	1.6628	1.0731	1.756	99.9999	7.98471
	18	1095	400	-8.862	55.4478	2.5187	44.5522	131.704	54.0197	1.8123	17.3399	1.4773	5.5696	3.3811	6.7193	5.0746	1.7373	1.0345	1.8346	100	7.66665
	19	1090	400	-8.929	53.0912	2.5067	46.9088	153.745	54.5746	1.744	17.2601	1.4303	5.3391	3.2359	6.5038	5.1889	1.8107	0.9998	1.9126	99.9998	7.3635
	20	1085	400	-8.996	50.9422	2.4953	49.0578	177.869	55.1025	1.6804	17.1732	1.3851	5.1195	3.1014	6.2993	5.2965	1.8834	0.9687	1.9902	100	7.07426
	21	1080	400	-9.064	48.9725	2.4844	51.0275	204.08	55.6056	1.621	17.0801	1.3414	4.91	2.9762	6.1048	5.3977	1.9553	0.9405	2.0674	100	6.79775
	22	1075	400	-9.132	47.1587	2.4739	52.8413	232.327	56.0861	1.5654	16.9818	1.2992	4.7099	2.8595	5.9194	5.493	2.0265	0.9149	2.1443	100	6.53319
	23	1070	400	-9.201	45.4815	2.4639	54.5185	262.603	56.5456	1.5133	16.8788	1.2584	4.5187	2.7503	5.7423	5.5827	2.0972	0.8917	2.221	100	6.27991
	24	1065	400	-9.27	43.9248	2.4543	56.0752	294.849	56.9858	1.4643	16.7718	1.2188	4.3357	2.648	5.5729	5.6673	2.1673	0.8706	2.2974	99.9999	6.03695
	25	1060	400	-9.34	42.4749	2.4451	57.5251	328.927	57.408	1.4183	16.6614	1.1805	4.1605	2.5518	5.4106	5.7469	2.2369	0.8513	2.3738	100	5.80395
	26	1055	400	-9.41	41.1202	2.4362	58.8798	364.838	57.8134	1.3748	16.5479	1.1433	3.9925	2.4613	5.2549	5.8219	2.3062	0.8337	2.4501	100	5.58006
	27	1050	400	-9.481	39.803	2.4277	60.197	398.933	58.1895	1.323	16.4196	1.1126	3.8494	2.3749	5.1167	5.8909	2.3775	0.8166	2.5292	99.9999	5.39034
	28	1045	400	-9.553	38.5554	2.4196	61.4446	433.012	58.5481	1.262	16.2889	1.0872	3.7284	2.2895	4.9802	5.9569	2.4493	0.8002	2.6093	100	5.23047
	29	1040	400	-9.625	37.3875	2.4117	62.6125	468.166	58.8947	1.2043	16.1579	1.0623	3.6109	2.2081	4.8475	6.0195	2.5206	0.7852	2.6891	100	5.075
	30	1035	400	-9.697	36.2902	2.404	63.7098	504.081	59.2294	1.1497	16.0261	1.0377	3.4969	2.1306	4.7191	6.0786	2.5914	0.7715	2.7688	99.9998	4.92371
	31	1030	400	-9.771	35.2566	2.3966	64.7434	540.505	59.5528	1.098	15.8935	1.0136	3.3863	2.0567	4.5949	6.1345	2.6619	0.7591	2.8485	99.9998	4.77671
	32	1025	400	-9.844	34.2808	2.3894	65.7192	577.431	59.8655	1.049	15.7603	0.99	3.279	1.9863	4.4747	6.1872	2.7321	0.7478	2.9282	100	4.63387
	33	1020	400	-9.919	33.3576	2.3824	66.6424	614.611	60.1679	1.0025	15.6263	0.9668	3.1748	1.919	4.3584	6.2368	2.802	0.7376	3.0079	100	4.49487
	34	1015	400	-9.993	32.4825	2.3755	67.5175	651.778	60.4605	0.9583	15.4918	0.944	3.0737	1.8547	4.2459	6.2834	2.8716	0.7283	3.0877	99.9999	4.35972
	35	1010	400	-10.069	31.6514	2.3689	68.3486	688.811	60.7438	0.9163	15.3568	0.9217	2.9755	1.7932	4.1369	6.3271	2.941	0.72	3.1677	100	4.22829
	36	1005	400	-10.145	30.8608	2.3624	69.1392	725.605	61.018	0.8764	15.2212	0.8998	2.8802	1.7344	4.0316	6.368	3.0102	0.7126	3.2477	100	4.10049
	37	1000	400	-10.221	30.1075	2.3561	69.8925	761.904	61.2836	0.8384	15.0851	0.8782	2.7877	1.678	3.9297	6.4062	3.0792	0.706	3.3279	100	3.9761
	38	995	400	-10.299	29.3886	2.3499	70.6114	797.627	61.5408	0.8022	14.9485	0.8571	2.6979	1.6239	3.8311	6.4417	3.148	0.7002	3.4084	99.9998	3.8552
	39	990	400	-10.376	28.7015	2.3439	71.2985	832.339	61.79	0.7677	14.8116	0.8365	2.6106	1.572	3.7359	6.4747	3.2167	0.6952	3.489	99.9999	3.73759
	40	985	400	-10.455	28.0441	2.338	71.9559	865.964	62.0315	0.7349	14.6741	0.8162	2.526	1.5222	3.6438	6.5052	3.2853	0.6909	3.57	100	3.62328
	41	980	400	-10.534	27.4141	2.3322	72.5859	898.463	62.2654	0.7035	14.5363	0.7963	2.4437	1.4744	3.5549	6.5332	3.3538	0.6874	3.6512	100	3.51192
	42	975	400	-10.614	26.8099	2.3266	73.1901	929.608	62.4921	0.6736	14.3981	0.7768	2.3638	1.4283	3.4691	6.5588	3.4221	0.6845	3.7327	99.9999	3.40363
	43	970	400	-10.694	26.2296	2.3211	73.7704	959.18	62.7118	0.645	14.2596	0.7576	2.2863	1.3841	3.3864	6.5821	3.4904	0.6823	3.8145	100	3.2983
	44	965	400	-10.775	25.6717	2.3157	74.3283	986.961	62.9246	0.6177	14.1206	0.7389	2.211	1.3415	3.3066	6.603	3.5586	0.6808	3.8967	100	3.19593
	45	960	400	-10.857	25.1349	2.3104	74.8651	1012.98	63.1307	0.5916	13.9814	0.7205	2.1378	1.3004	3.2298	6.6218	3.6268	0.6799	3.9793	100	3.09618
	46	955	400	-10.939	24.6178	2.3053	75.3822	1037.29	63.3303	0.5666	13.8418	0.7025	2.0668	1.2608	3.1559	6.6384	3.6949	0.6797	4.0623	100	2.99928
	47	950	400	-11.022	24.1194	2.3002	75.8806	1059.25	63.5237	0.5427	13.7019	0.6848	1.9978	1.2227	3.0849	6.6528	3.7629	0.6801	4.1456	99.9999	2.9049
	48	945	400	-11.105	23.6385	2.2952	76.3615	1079.44	63.7108	0.5199	13.5617	0.6675	1.9308	1.1859	3.0167	6.6652	3.8308	0.6812	4.2294	99.9999	2.81315
	49	940	400	-11.19	23.1743	2.2904	76.8257	1097.24	63.892	0.498	13.4212	0.6506	1.8657	1.1503	2.9514	6.6755	3.8987	0.6828	4.3137	99.9999	2.7239
	50	935	400	-11.275	22.7257	2.2856	77.2743	1112.76	64.0672	0.4771	13.2805	0.634	1.8026	1.116	2.8888	6.6838	3.9666	0.6851	4.3983	100	2.63718
	51	930	400	-11.361	22.2921	2.2809	77.7079	1126.16	64.2367	0.4571	13.1395	0.6177	1.7413	1.0828	2.829	6.6901	4.0343	0.6881	4.4835	100	2.55276
	52	925	400	-11.447	21.8726	2.2763	78.1274	1137.1	64.4004	0.4379	12.9983	0.6018	1.6817	1.0507	2.772	6.6945	4.102	0.6916	4.569	99.9999	2.47063
	53	920	400	-11.534	21.4667	2.2718	78.5333	1145.78	64.5586	0.4195	12.8569	0.5862	1.6239	1.0196	2.7177	6.6971	4.1696	0.6958	4.6551	100	2.3908
	54	915	400	-11.622	21.0736	2.2674	78.9264	1152.39	64.7114	0.4019	12.7153	0.571	1.5678	0.9896	2.6662	6.6978	4.237	0.7006	4.7415	100	2.31325
	55	910	400	-11.711	20.6928	2.2631	79.3072	1156.64	64.8587	0.385	12.5735	0.556	1.5134	0.9605	2.6174	6.6967	4.3044	0.7061	4.8285	100	2.2378
	56	905	400	-11.8	20.3238	2.2588	79.6762	1159.04	65.0007	0.3688	12.4316	0.5414	1.4606	0.9322	2.5712	6.6939	4.3715	0.7121	4.9159	99.9999	2.16453
	57	900	400	-11.89	19.9661	2.2546	80.0339	1159.04	65.1375	0.3533	12.2897	0.5271	1.4093	0.9049	2.5278	6.6893	4.4385	0.7189	5.0037	100	2.09322
Tholeitic Hawaii Primary MELT	1	1440	800	-5.192	99.7128	2.7387	0.287209	0.414	48.2652	1.7571	10.1789	1.713	9.9848	16.9754	8.1861	1.5077	0.2696	0.1638	0.9986	100	12.8088
	2	1435	796.5	-5.235	98.6352	2.7393	1.36478	0.427464	48.1755	1.7748	10.2666	1.7258	10.0317	16.7858	8.2683	1.524	0.2725	0.1656	1.0095	100	12.8738
	3	1430	793	-5.278	97.5837	2.7398	2.41633	0.441469	48.0866	1.7925	10.3537	1.7385	10.0777	16.5975	8.3501	1.5402	0.2755	0.1673	1.0204	100	12.9376
	4	1425	789.5	-5.321	96.5572	2.7403	3.44283	0.456037	47.9985	1.81	10.4403	1.7513	10.1227	16.4105	8.4315	1.5564	0.2784	0.1691	1.0312	99.9999	13.0004
	5	1420	786	-5.364	95.5548	2.7408	4.44519	0.471086	47.9111	1.8275	10.5262	1.764	10.1669	16.2249	8.5125	1.5726	0.2813	0.1709	1.042	99.9999	13.0622
	6	1415	782.5	-5.408	94.5757	2.7413	5.42429	0.486743	47.8244	1.8449	10.6116	1.7767	10.2102	16.0407	8.5932	1.5887	0.2842	0.1727	1.0528	100	13.123
	7	1410	779	-5.452	93.619	2.7418	6.38097	0.503037	47.7385	1.8622	10.6964	1.7894	10.2525	15.8577	8.6734	1.6047	0.2871	0.1744	1.0636	99.9999	13.1827
	8	1405	775.5	-5.496	92.684	2.7423	7.316	0.519876	47.6534	1.8794	10.7806	1.802	10.294	15.6761	8.7533	1.6208	0.29	0.1762	1.0743	100	13.2414
	9	1400	772	-5.54	91.7698	2.7428	8.23016	0.537403	47.569	1.8965	10.8642	1.8146	10.3346	15.4958	8.8327	1.6367	0.2929	0.1779	1.085	99.9999	13.2992
	10	1395	768.5	-5.585	90.8758	2.7432	9.12416	0.55552	47.4852	1.9135	10.9473	1.8273	10.3743	15.3168	8.9118	1.6526	0.2958	0.1797	1.0957	100	13.356
	11	1390	765	-5.63	90.0013	2.7437	9.9987	0.574513	47.4022	1.9305	11.0299	1.8399	10.4131	15.1391	8.9905	1.6685	0.2987	0.1814	1.1063	100	13.4117
	12	1385	761.5	-5.675	89.1456	2.7442	10.8544	0.594155	47.3199	1.9473	11.1119	1.8524	10.4511	14.9626	9.0688	1.6843	0.3015	0.1832	1.1169	99.9999	13.4664
	13	1380	758	-5.72	88.308	2.7446	11.692	0.614469	47.2383	1.9641	11.1934	1.865	10.4881	14.7874	9.1467	1.7001	0.3044	0.1849	1.1275	99.9999	13.5201
	14	1375	754.5	-5.766	87.488	2.7451	12.512	0.635624	47.1574	1.9807	11.2744	1.8776	10.5244	14.6134	9.2243	1.7159	0.3072	0.1867	1.1381	100	13.5731
	15	1370	751	-5.812	86.685	2.7455	13.315	0.657809	47.0771	1.9973	11.3548	1.8901	10.5597	14.4406	9.3015	1.7316	0.3101	0.1884	1.1486	99.9998	13.6248
	16	1365	747.5	-5.858	85.8984	2.746	14.1016	0.680613	46.9976	2.0139	11.4348	1.9027	10.5942	14.2691	9.3783	1.7473	0.3129	0.1901	1.1592	100	13.6758
	17	1360	744	-5.905	85.1278	2.7464	14.8722	0.704531	46.9187	2.0303	11.5142	1.9152	10.6279	14.0988	9.4548	1.7629	0.3158	0.1918	1.1697	100	13.7257
	18	1355	740.5	-5.952	84.3725	2.7469	15.6275	0.72929	46.8404	2.0466	11.5932	1.9278	10.6607	13.9297	9.5308	1.7785	0.3186	0.1935	1.1801	99.9999	13.7748
	19	1350	737	-5.999	83.6321	2.7473	16.3679	0.755092	46.7628	2.0629	11.6716	1.9403	10.6926	13.7619	9.6066	1.794	0.3214	0.1953	1.1906	100	13.8227
	20	1345	733.5	-6.046	82.9062	2.7477	17.0938	0.781988	46.6858	2.0791	11.7497	1.9528	10.7237	13.5951	9.6819	1.8096	0.3242	0.197	1.201	99.9999	13.8698
	21	1340	730	-6.094	82.1942	2.7481	17.8058	0.809841	46.6095	2.0952	11.8272	1.9654	10.754	13.4296	9.7569	1.825	0.327	0.1987	1.2114	99.9999	13.916
	22	1335	726.5	-6.142	81.4957	2.7485	18.5043	0.839073	46.5338	2.1113	11.9043	1.9779	10.7834	13.2652	9.8315	1.8405	0.3298	0.2004	1.2218	99.9999	13.9612
	23	1330	723	-6.191	80.8104	2.7489	19.1896	0.869361	46.4587	2.1273	11.9809	1.9905	10.812	13.102	9.9058	1.8559	0.3326	0.2021	1.2321	99.9999	14.0056
	24	1325	719.5	-6.239	80.1379	2.7493	19.8621	0.900949	46.3842	2.1432	12.0572	2.003	10.8398	12.94	9.9797	1.8713	0.3354	0.2038	1.2425	100	14.049
	25	1320	716	-6.288	79.4776	2.7497	20.5224	0.933684	46.3104	2.159	12.133	2.0156	10.8667	12.7791	10.0532	1.8866	0.3382	0.2055	1.2528	100	14.0915
	26	1315	712.5	-6.338	78.8482	2.7498	21.1518	0.97499	46.2643	2.1747	12.2111	2.027	10.8858	12.5991	10.1257	1.9015	0.3409	0.2071	1.2628	100	14.1241
	27	1310	709	-6.387	78.2323	2.7498	21.7677	1.01906	46.2216	2.1903	12.2892	2.0382	10.9031	12.4183	10.1978	1.9163	0.3436	0.2087	1.2727	99.9998	14.1545
	28	1305	705.5	-6.437	77.627	2.7498	22.373	1.06537	46.1788	2.2059	12.3668	2.0494	10.9197	12.2395	10.2695	1.9311	0.3463	0.2104	1.2827	100	14.1842
	29	1300	702	-6.487	77.0321	2.7499	22.9679	1.11378	46.1358	2.2214	12.444	2.0606	10.9355	12.0625	10.3408	1.9459	0.3489	0.212	1.2926	100	14.2129
	30	1295	698.5	-6.538	76.4472	2.7499	23.5528	1.16439	46.0926	2.2369	12.5207	2.0719	10.9505	11.8873	10.4118	1.9606	0.3516	0.2136	1.3025	100	14.2409
	31	1290	695	-6.589	75.8719	2.7499	24.1281	1.21731	46.0491	2.2523	12.597	2.0831	10.9647	11.7141	10.4824	1.9753	0.3543	0.2152	1.3123	99.9998	14.2679
	32	1285	691.5	-6.64	75.3059	2.7499	24.6941	1.27292	46.0054	2.2676	12.6729	2.0944	10.9782	11.5427	10.5527	1.99	0.3569	0.2168	1.3222	99.9998	14.2942
	33	1280	688	-6.691	74.7488	2.75	25.2512	1.33107	45.9614	2.2829	12.7484	2.1057	10.991	11.3731	10.6226	2.0047	0.3596	0.2185	1.3321	100	14.3197
	34	1275	684.5	-6.743	74.2005	2.75	25.7995	1.39187	45.9171	2.2981	12.8235	2.1171	11.003	11.2054	10.6922	2.0193	0.3623	0.2201	1.3419	100	14.3444
	35	1270	681	-6.795	73.6605	2.75	26.3395	1.45579	45.8724	2.3133	12.8982	2.1284	11.0143	11.0395	10.7614	2.034	0.3649	0.2217	1.3517	99.9998	14.3683
	36	1265	677.5	-6.848	73.1286	2.7501	26.8714	1.5223	45.8274	2.3285	12.9725	2.1398	11.0249	10.8755	10.8303	2.0486	0.3676	0.2233	1.3616	100	14.3915
	37	1260	674	-6.901	72.6045	2.7501	27.3955	1.59221	45.782	2.3436	13.0464	2.1513	11.0348	10.7132	10.8989	2.0632	0.3702	0.2249	1.3714	99.9999	14.414
	38	1255	670.5	-6.954	72.0879	2.7502	27.9121	1.66533	45.7362	2.3587	13.12	2.1628	11.0441	10.5528	10.9671	2.0778	0.3729	0.2265	1.3812	100	14.4358
	39	1250	667	-7.007	71.5784	2.7502	28.4216	1.74141	45.6899	2.3737	13.1933	2.1743	11.0526	10.3941	11.0349	2.0924	0.3755	0.2281	1.3911	99.9999	14.4568
	40	1245	663.5	-7.061	71.0759	2.7503	28.9241	1.82138	45.6431	2.3887	13.2663	2.1858	11.0605	10.2373	11.1024	2.107	0.3782	0.2298	1.4009	100	14.477
	41	1240	660	-7.116	70.58	2.7503	29.42	1.90502	45.5957	2.4037	13.339	2.1974	11.0677	10.0822	11.1696	2.1216	0.3808	0.2314	1.4107	99.9998	14.4966
	42	1235	656.5	-7.17	70.0905	2.7504	29.9095	1.99251	45.5478	2.4187	13.4114	2.2091	11.0743	9.9289	11.2364	2.1362	0.3835	0.233	1.4206	99.9999	14.5157
	43	1230	653	-7.225	69.607	2.7505	30.393	2.08401	45.4993	2.4337	13.4835	2.2208	11.0803	9.7774	11.3029	2.1509	0.3862	0.2346	1.4305	100	14.534
	44	1225	649.5	-7.281	68.4003	2.7498	31.5997	2.16371	45.4147	2.4636	13.6315	2.2342	11.1534	9.5967	11.2336	2.1848	0.393	0.2387	1.4557	99.9999	14.6287
	45	1220	646	-7.336	66.7933	2.7487	33.2067	2.23306	45.3029	2.5015	13.823	2.249	11.2682	9.4012	11.0855	2.2311	0.4024	0.2445	1.4907	100	14.7711
	46	1215	642.5	-7.392	65.2427	2.7475	34.7573	2.30569	45.1967	2.538	14.0124	2.2634	11.3816	9.2069	10.9349	2.2777	0.412	0.2503	1.5261	100	14.9115
	47	1210	639	-7.449	63.7454	2.7462	36.2546	2.38342	45.0966	2.5729	14.1995	2.2775	11.4936	9.0136	10.7816	2.3248	0.4217	0.2562	1.562	100	15.05
	48	1205	635.5	-7.506	62.2981	2.7449	37.7019	2.46547	45.0028	2.6061	14.3844	2.2912	11.6042	8.8213	10.6259	2.3722	0.4315	0.2621	1.5983	100	15.1866
	49	1200	632	-7.563	60.8844	2.7435	39.1156	2.54624	44.9045	2.6376	14.5672	2.3054	11.7162	8.6319	10.4715	2.4206	0.4415	0.2682	1.6354	100	15.3253
	50	1195	628.5	-7.621	59.5103	2.742	40.4897	2.63209	44.8113	2.6671	14.7482	2.3195	11.8272	8.4419	10.316	2.4697	0.4517	0.2744	1.6732	100	15.4628
	51	1190	625	-7.679	58.1721	2.7404	41.8279	2.72207	44.7232	2.6941	14.9274	2.3335	11.9375	8.2515	10.1588	2.5196	0.4621	0.2807	1.7116	100	15.5993
	52	1185	621.5	-7.737	56.8661	2.7387	43.1339	2.81773	44.6408	2.7182	15.1048	2.3474	12.0472	8.0606	9.9996	2.5705	0.4727	0.2872	1.751	100	15.7351
	53	1180	618	-7.796	55.5886	2.7368	44.4114	2.91877	44.5649	2.7389	15.2805	2.3613	12.1567	7.8687	9.8381	2.6224	0.4836	0.2938	1.7912	100	15.8707
	54	1175	614.5	-7.855	54.331	2.7348	45.669	3.02831	44.4982	2.7554	15.4531	2.3752	12.2656	7.6751	9.6736	2.6759	0.4947	0.3006	1.8327	100	16.0056
	55	1170	611	-7.915	52.5296	2.7276	47.4704	3.29686	44.7252	2.7624	15.4556	2.385	12.2859	7.4024	9.5072	2.7582	0.5117	0.3109	1.8955	100	16.038
	56	1165	607.5	-7.975	50.754	2.7194	49.246	3.6216	44.9956	2.7573	15.4614	2.3902	12.2719	7.1258	9.3394	2.8451	0.5296	0.3217	1.9618	99.9998	16.0276
	57	1160	604	-8.035	48.3699	2.7011	51.6301	4.31023	45.5943	2.6283	15.6549	2.3401	11.8977	6.7898	9.1699	2.9731	0.5557	0.3376	2.0585	99.9999	15.5617
	58	1155	600.5	-8.096	46.1173	2.6815	53.8827	5.19637	46.2471	2.4839	15.8659	2.2797	11.4641	6.457	9.0003	3.1061	0.5829	0.3541	2.1591	100	15.0195
	59	1150	597	-8.157	44.1118	2.6625	55.8882	6.25173	46.8837	2.3427	16.0806	2.2171	11.0293	6.1425	8.8316	3.2357	0.6094	0.3702	2.2572	100	14.4737
	60	1145	593.5	-8.219	42.3337	2.6445	57.6663	7.49204	47.4955	2.208	16.2926	2.1543	10.6041	5.8473	8.6648	3.3606	0.635	0.3857	2.352	99.9999	13.9384
	61	1140	590	-8.281	40.7561	2.6275	59.2439	8.93305	48.0791	2.0815	16.4982	2.0922	10.1941	5.5707	8.5007	3.4804	0.6595	0.4007	2.4431	100	13.4206
	62	1135	586.5	-8.344	39.3521	2.6115	60.6479	10.595	48.6338	1.9633	16.6955	2.0315	9.8016	5.3117	8.3396	3.5948	0.6831	0.415	2.5302	100	12.9238
	63	1130	583	-8.407	38.0971	2.5964	61.9029	12.5026	49.1604	1.8535	16.8835	1.9726	9.4274	5.0692	8.1818	3.704	0.7056	0.4286	2.6136	100	12.449
	64	1125	579.5	-8.471	36.9699	2.5823	63.0301	14.6791	49.6605	1.7515	17.0618	1.9155	9.0714	4.8417	8.0273	3.8081	0.7271	0.4417	2.6933	99.9999	11.9963
	65	1120	576	-8.535	35.9522	2.569	64.0478	17.1514	50.1362	1.6568	17.2304	1.8605	8.7328	4.6281	7.8764	3.9076	0.7477	0.4542	2.7695	100	11.565
	66	1115	572.5	-8.599	35.029	2.5565	64.971	19.9618	50.5893	1.5688	17.3893	1.8073	8.4107	4.4271	7.7288	4.0026	0.7674	0.4662	2.8425	100	11.1539
	67	1110	569	-8.664	34.1874	2.5447	65.8126	23.1366	51.022	1.487	17.5386	1.7561	8.1041	4.2377	7.5846	4.0935	0.7863	0.4777	2.9125	100	10.762
	68	1105	565.5	-8.729	33.4169	2.5336	66.5831	26.7301	51.4361	1.4109	17.6785	1.7067	7.8119	4.0589	7.4436	4.1806	0.8044	0.4887	2.9796	99.9999	10.3879
	69	1100	562	-8.795	32.7083	2.5231	67.2917	30.7822	51.8336	1.3401	17.809	1.6591	7.5332	3.8899	7.3058	4.2641	0.8218	0.4993	3.0442	100	10.0305
	70	1095	558.5	-8.862	32.0282	2.513	67.9718	35.4324	52.2735	1.2912	17.8226	1.6221	7.2989	3.7092	7.1766	4.3478	0.8393	0.5099	3.1088	99.9999	9.73317
	71	1090	555	-8.929	31.4146	2.5034	68.5854	40.6163	52.6646	1.2334	17.8967	1.581	7.0561	3.5512	7.0458	4.4261	0.8557	0.5198	3.1695	99.9999	9.42226
	72	1085	551.5	-8.996	30.8439	2.4944	69.1561	46.4622	53.0429	1.1789	17.9638	1.5413	6.8236	3.4001	6.9187	4.5016	0.8715	0.5294	3.2282	100	9.12419
	73	1080	548	-9.064	30.3118	2.4857	69.6882	53.0274	53.409	1.1274	18.0242	1.503	6.6009	3.2557	6.7949	4.5745	0.8868	0.5387	3.2849	100	8.83841
	74	1075	544.5	-9.132	29.8145	2.4774	70.1855	60.3949	53.7637	1.0787	18.0786	1.466	6.3873	3.1176	6.6744	4.6448	0.9016	0.5477	3.3397	100	8.56404
	75	1070	541	-9.201	29.3486	2.4695	70.6514	68.6752	54.1078	1.0324	18.1272	1.4302	6.1822	2.9854	6.5569	4.7127	0.9159	0.5564	3.3927	99.9998	8.30031
	76	1065	537.5	-9.27	28.9112	2.4619	71.0888	77.9471	54.4417	0.9885	18.1706	1.3956	5.9853	2.8588	6.4425	4.7784	0.9297	0.5648	3.444	99.9999	8.04691
	77	1060	534	-9.34	28.304	2.4534	71.696	85.5264	54.7842	0.9438	18.1214	1.3625	5.7962	2.8018	6.3047	4.8412	0.9491	0.5769	3.5179	99.9997	7.80366
	78	1055	530.5	-9.41	27.4704	2.4433	72.5296	90.9704	55.1286	0.9198	17.9675	1.3348	5.6105	2.7061	6.2226	4.9142	0.9768	0.5945	3.6246	100	7.5696
	79	1050	527	-9.481	26.7064	2.4336	73.2936	96.7609	55.4679	0.884	17.8253	1.3092	5.4434	2.6191	6.1228	4.9848	1.0037	0.6115	3.7283	100	7.35831
	80	1045	523.5	-9.553	25.9769	2.424	74.0231	102.518	55.7998	0.8518	17.6796	1.2828	5.2753	2.537	6.0284	5.0529	1.0308	0.6286	3.833	100	7.1451
	81	1040	520	-9.625	25.2816	2.4145	74.7184	108.268	56.1242	0.8212	17.533	1.2562	5.1097	2.4586	5.936	5.1188	1.058	0.6459	3.9384	100	6.93447
	82	1035	516.5	-9.697	24.6186	2.4053	75.3814	113.972	56.4413	0.792	17.3854	1.2296	4.9469	2.3835	5.8456	5.1825	1.0853	0.6633	4.0445	99.9999	6.72696
	83	1030	513	-9.771	23.9859	2.3961	76.0141	119.564	56.7512	0.7642	17.237	1.203	4.7873	2.3116	5.757	5.2441	1.1127	0.6808	4.1512	100	6.523
	84	1025	509.5	-9.844	23.3816	2.3872	76.6184	125.083	57.0539	0.7377	17.0876	1.1764	4.631	2.2426	5.6701	5.3035	1.1403	0.6984	4.2585	100	6.32271
	85	1020	506	-9.919	22.7902	2.3781	77.2098	131.401	57.3782	0.7126	16.947	1.1494	4.4793	2.1749	5.5614	5.3641	1.1686	0.6964	4.3681	100	6.12713
	86	1015	502.5	-9.993	22.2249	2.3692	77.7751	137.626	57.6959	0.6887	16.8054	1.1226	4.3312	2.1099	5.4541	5.4225	1.197	0.6943	4.4784	100	5.93575
	87	1010	499	-10.069	21.6844	2.3605	78.3156	143.714	58.006	0.6659	16.6626	1.0961	4.1865	2.0475	5.3491	5.4787	1.2256	0.6928	4.5892	100	5.74845
	88	1005	495.5	-10.145	21.1672	2.3519	78.8328	149.589	58.3086	0.6442	16.5186	1.0697	4.0454	1.9877	5.2464	5.5326	1.2542	0.692	4.7006	100	5.56525
	89	1000	492	-10.221	20.6716	2.3435	79.3284	155.203	58.6038	0.6236	16.3733	1.0437	3.9076	1.9303	5.146	5.5843	1.2829	0.6919	4.8126	100	5.38611
	90	995	488.5	-10.299	20.198	2.3352	79.802	160.657	58.8917	0.6027	16.2284	1.0184	3.7758	1.8744	5.0458	5.6342	1.3116	0.6923	4.9248	100	5.21435
	91	990	485	-10.376	19.744	2.3271	80.256	165.806	59.1725	0.5824	16.0827	0.9937	3.6482	1.8204	4.9472	5.6819	1.3403	0.6933	5.0374	100	5.04785
	92	985	481.5	-10.455	19.3082	2.3191	80.6918	170.648	59.4464	0.5626	15.9364	0.9694	3.5245	1.7682	4.8503	5.7276	1.3691	0.695	5.1505	100	4.88608
	93	980	478	-10.534	18.8895	2.3113	81.1105	175.186	59.7133	0.5435	15.7893	0.9456	3.4047	1.7178	4.7552	5.7712	1.398	0.6973	5.2641	100	4.72915
	94	975	474.5	-10.614	18.4869	2.3036	81.5131	179.349	59.9736	0.525	15.6415	0.9223	3.2887	1.6691	4.6618	5.8127	1.427	0.7002	5.3782	100	4.57695
	95	970	471	-10.694	18.0994	2.2961	81.9006	183.147	60.2273	0.5071	15.4929	0.8995	3.1762	1.622	4.5703	5.8522	1.456	0.7037	5.4929	100	4.42913
	96	965	467.5	-10.775	17.726	2.2886	82.274	186.552	60.4745	0.4897	15.3436	0.8771	3.0673	1.5765	4.4807	5.8896	1.4851	0.7079	5.6081	100	4.28571
	97	960	464	-10.857	17.366	2.2813	82.634	189.54	60.7153	0.4729	15.1935	0.8551	2.9618	1.5325	4.393	5.925	1.5143	0.7128	5.724	100	4.14647
	98	955	460.5	-10.939	17.0185	2.2741	82.9815	192.088	60.9498	0.4566	15.0426	0.8336	2.8595	1.4898	4.3073	5.9583	1.5435	0.7184	5.8405	99.9999	4.01129
	99	950	457	-11.022	16.6829	2.267	83.3171	194.223	61.1782	0.4409	14.8909	0.8125	2.7604	1.4486	4.2237	5.9897	1.5729	0.7247	5.9576	100	3.88006
	100	945	453.5	-11.105	16.3585	2.26	83.6415	195.884	61.4005	0.4257	14.7383	0.7919	2.6643	1.4087	4.1421	6.019	1.6024	0.7317	6.0755	100	3.75267
	101	940	450	-11.19	16.0446	2.2531	83.9554	197.106	61.6167	0.411	14.585	0.7717	2.5712	1.37	4.0627	6.0462	1.632	0.7395	6.194	100	3.62901
	102	935	446.5	-11.275	15.7407	2.2463	84.2593	197.834	61.8269	0.3968	14.4307	0.7519	2.4809	1.3326	3.9855	6.0715	1.6617	0.7481	6.3134	100	3.50886
	103	930	443	-11.361	15.4463	2.2396	84.5537	198.153	62.0313	0.3831	14.2756	0.7325	2.3934	1.2963	3.9106	6.0947	1.6915	0.7575	6.4335	100	3.39222
	104	925	439.5	-11.447	15.1608	2.233	84.8392	197.97	62.2297	0.3699	14.1195	0.7135	2.3085	1.2612	3.838	6.116	1.7215	0.7678	6.5545	100	3.27887
	105	920	436	-11.534	14.8839	2.2265	85.1161	197.333	62.4223	0.3571	13.9625	0.6948	2.2262	1.2271	3.7678	6.1351	1.7516	0.7791	6.6763	99.9999	3.16872
	106	915	432.5	-11.622	14.615	2.2201	85.385		62.6091	0.3447	13.8045	0.6766	2.1465	1.1941	3.7001	6.1523	1.7818	0.7913	6.7991	100	3.06195
A22 Alkaline Haawaii Primary MELT	1	1390	800	-5.63	100	2.7696	4.89999e-05	0.186767	40.868	1.9485	11.6908	2.2585	9.9001	14.9883	10.8915	4.7863	1.269	0.3997	0.9992	99.9999	13.2602
	2	1385	796	-5.675	99.5592	2.7696	0.44083	0.194178	40.8666	1.9571	11.7426	2.269	9.909	14.8313	10.9371	4.8075	1.2746	0.4015	1.0036	99.9999	13.2806
	3	1380	792	-5.72	99.0082	2.7693	0.991808	0.202535	40.865	1.968	11.8079	2.2817	9.9202	14.6336	10.9947	4.8342	1.2817	0.4037	1.0092	99.9999	13.3058
	4	1375	788	-5.766	98.4672	2.769	1.53278	0.211252	40.8635	1.9788	11.8728	2.2943	9.9308	14.4378	11.0518	4.8608	1.2888	0.4059	1.0148	100	13.3301
	5	1370	784	-5.812	97.936	2.7687	2.06397	0.220394	40.8621	1.9896	11.9372	2.3069	9.9408	14.2438	11.1084	4.8872	1.2957	0.4081	1.0203	100	13.3538
	6	1365	780	-5.858	97.4144	2.7684	2.58561	0.230038	40.8609	2.0002	12.0011	2.3195	9.9501	14.0516	11.1646	4.9133	1.3027	0.4103	1.0257	100	13.3768
	7	1360	776	-5.905	96.9021	2.7681	3.09791	0.240104	40.8597	2.0108	12.0645	2.332	9.9588	13.8614	11.2203	4.9393	1.3096	0.4125	1.0311	100	13.399
	8	1355	772	-5.952	96.3989	2.7679	3.60109	0.250669	40.8586	2.0213	12.1275	2.3446	9.9669	13.6729	11.2756	4.9651	1.3164	0.4146	1.0365	100	13.4206
	9	1350	768	-5.999	95.9046	2.7676	4.09535	0.261758	40.8576	2.0317	12.19	2.3571	9.9743	13.4863	11.3304	4.9907	1.3232	0.4168	1.0419	100	13.4413
	10	1345	764	-6.046	95.4191	2.7673	4.5809	0.273401	40.8567	2.042	12.2521	2.3696	9.9812	13.3015	11.3848	5.0161	1.3299	0.4189	1.0472	100	13.4614
	11	1340	760	-6.094	94.9421	2.7671	5.05792	0.285627	40.8559	2.0523	12.3136	2.3821	9.9874	13.1186	11.4388	5.0413	1.3366	0.421	1.0524	100	13.4808
	12	1335	756	-6.142	94.4734	2.7668	5.52659	0.29847	40.8552	2.0625	12.3747	2.3947	9.993	12.9374	11.4923	5.0663	1.3432	0.4231	1.0577	100	13.4997
	13	1330	752	-6.191	94.0129	2.7665	5.98712	0.311961	40.8546	2.0726	12.4353	2.4072	9.998	12.7581	11.5453	5.0911	1.3498	0.4252	1.0628	100	13.5177
	14	1325	748	-6.239	93.5603	2.7663	6.43966	0.326212	40.8541	2.0826	12.4955	2.4196	10.0024	12.5806	11.5979	5.1157	1.3563	0.4272	1.068	99.9999	13.535
	15	1320	744	-6.288	93.1156	2.766	6.8844	0.341114	40.8537	2.0926	12.5551	2.4321	10.0063	12.4048	11.6501	5.1402	1.3628	0.4293	1.0731	100	13.5518
	16	1315	740	-6.338	92.6785	2.7658	7.32149	0.35678	40.8534	2.1024	12.6144	2.4446	10.0095	12.2309	11.7018	5.1644	1.3692	0.4313	1.0781	100	13.5679
	17	1310	736	-6.387	92.2489	2.7655	7.7511	0.37325	40.8531	2.1122	12.6731	2.4571	10.0121	12.0587	11.7531	5.1885	1.3756	0.4333	1.0832	100	13.5833
	18	1305	732	-6.437	91.8266	2.7653	8.1734	0.390571	40.853	2.1219	12.7314	2.4696	10.0142	11.8883	11.8039	5.2123	1.382	0.4353	1.0881	100	13.5981
	19	1300	728	-6.487	91.4115	2.765	8.58853	0.40879	40.8529	2.1316	12.7892	2.4821	10.0156	11.7197	11.8543	5.236	1.3882	0.4373	1.0931	100	13.6122
	20	1295	724	-6.538	91.0034	2.7648	8.99664	0.427957	40.853	2.1411	12.8466	2.4945	10.0165	11.5529	11.9043	5.2595	1.3945	0.4392	1.098	100	13.6256
	21	1290	720	-6.589	90.6021	2.7646	9.39787	0.448126	40.8531	2.1506	12.9034	2.507	10.0168	11.3877	11.9538	5.2828	1.4006	0.4412	1.1028	99.9998	13.6384
	22	1285	716	-6.64	90.2076	2.7643	9.79238	0.469353	40.8533	2.16	12.9599	2.5195	10.0166	11.2244	12.0029	5.3059	1.4068	0.4431	1.1077	100	13.6507
	23	1280	712	-6.691	89.8197	2.7641	10.1803	0.4917	40.8536	2.1693	13.0159	2.532	10.0157	11.0627	12.0516	5.3288	1.4128	0.445	1.1125	99.9999	13.6622
	24	1275	708	-6.743	89.4383	2.7639	10.5617	0.515229	40.854	2.1786	13.0714	2.5445	10.0143	10.9028	12.0998	5.3515	1.4189	0.4469	1.1172	99.9999	13.6731
	25	1270	704	-6.795	89.0631	2.7637	10.9369	0.540132	40.8545	2.1878	13.1264	2.557	10.0124	10.7447	12.1477	5.3741	1.4248	0.4488	1.1219	100	13.6835
	26	1265	700	-6.848	88.6942	2.7635	11.3058	0.566239	40.8551	2.1969	13.181	2.5695	10.0099	10.5882	12.1951	5.3964	1.4308	0.4506	1.1266	100	13.6932
	27	1260	696	-6.901	88.3314	2.7633	11.6686	0.593882	40.8557	2.2059	13.2352	2.5821	10.0068	10.4334	12.242	5.4186	1.4366	0.4525	1.1312	100	13.7024
	28	1255	692	-6.954	87.9745	2.7631	12.0255	0.622874	40.8564	2.2148	13.2889	2.5946	10.0032	10.2803	12.2886	5.4406	1.4425	0.4543	1.1358	100	13.7109
	29	1250	688	-7.007	87.6234	2.7628	12.3766	0.653582	40.8572	2.2237	13.3421	2.6072	9.999	10.129	12.3347	5.4624	1.4482	0.4562	1.1403	100	13.7188
	30	1245	684	-7.061	87.2781	2.7626	12.7219	0.685804	40.8581	2.2325	13.3949	2.6198	9.9943	9.9793	12.3804	5.484	1.454	0.458	1.1448	100	13.7262
	31	1240	680	-7.116	86.9383	2.7625	13.0617	0.719946	40.8591	2.2412	13.4472	2.6324	9.9891	9.8312	12.4257	5.5054	1.4597	0.4598	1.1493	100	13.733
	32	1235	676	-7.17	83.6793	2.7579	16.3207	0.741481	40.8134	2.1587	13.6172	2.6809	10.1583	9.552	12.1207	5.7107	1.5165	0.4777	1.1941	100	13.9695
	33	1230	672	-7.225	79.6014	2.7499	20.3986	0.774105	40.8969	2.0341	13.7018	2.7383	10.3289	9.2267	11.7305	5.9912	1.5942	0.5021	1.2553	100	14.2165
	34	1225	668	-7.281	75.7449	2.7409	24.2551	0.815643	41.0486	1.9063	13.7336	2.7937	10.4661	8.8976	11.3475	6.2843	1.6754	0.5277	1.3192	100	14.4244
	35	1220	664	-7.336	72.2683	2.7317	27.7317	0.86139	41.2114	1.7834	13.7609	2.8462	10.5827	8.5728	10.9758	6.5751	1.756	0.5531	1.3826	100	14.6065
	36	1215	660	-7.392	69.1214	2.7224	30.8786	0.912011	41.3859	1.6655	13.7844	2.8952	10.6764	8.2533	10.6161	6.8634	1.8359	0.5783	1.4456	100	14.7596
	37	1210	656	-7.449	66.259	2.7129	33.741	0.968278	41.5739	1.5524	13.8054	2.94	10.7441	7.9396	10.269	7.1492	1.9152	0.6032	1.508	100	14.8796
	38	1205	652	-7.506	63.6387	2.7031	36.3613	1.03205	41.778	1.4432	13.8263	2.9796	10.7808	7.6318	9.9348	7.4333	1.9941	0.6281	1.5701	100	14.96
	39	1200	648	-7.563	61.2204	2.6928	38.7796	1.1051	42.0026	1.3365	13.8519	3.0122	10.7789	7.3295	9.6138	7.7169	2.0728	0.6529	1.6321	100	14.9905
	40	1195	644	-7.621	58.971	2.6819	41.029	1.19069	42.2519	1.2304	13.8885	3.0356	10.7295	7.0321	9.3065	8.0015	2.1519	0.6778	1.6944	100	14.959
	41	1190	640	-7.679	56.879	2.6705	43.121	1.29033	42.5228	1.1259	13.9381	3.0494	10.6333	6.7408	9.013	8.2863	2.2311	0.7027	1.7567	100	14.8659
	42	1185	636	-7.737	54.9459	2.6587	45.0541	1.40443	42.8076	1.0256	13.9974	3.0549	10.4994	6.4579	8.7331	8.5686	2.3095	0.7274	1.8185	99.9999	14.7226
	43	1180	632	-7.796	53.1684	2.6469	46.8316	1.5325	43.0998	0.9312	14.0632	3.0533	10.3365	6.1853	8.4666	8.8463	2.3868	0.7518	1.8793	100	14.54
	44	1175	628	-7.855	51.538	2.6351	48.462	1.67571	43.3952	0.8437	14.133	3.0456	10.1511	5.924	8.2132	9.1177	2.4623	0.7755	1.9388	100	14.3262
	45	1170	624	-7.915	50.0433	2.6235	49.9567	1.83443	43.6913	0.7631	14.2049	3.0324	9.9483	5.6745	7.9725	9.3819	2.5358	0.7987	1.9967	100	14.0877
	46	1165	620	-7.975	48.6725	2.6121	51.3275	2.00909	43.986	0.6894	14.2774	3.0146	9.7322	5.4368	7.7438	9.6384	2.6072	0.8212	2.0529	99.9999	13.8297
	47	1160	616	-8.035	47.4139	2.601	52.5861	2.20191	44.2781	0.6222	14.3497	2.9925	9.5061	5.211	7.5267	9.8869	2.6764	0.843	2.1074	100	13.5564
	48	1155	612	-8.096	46.2562	2.5902	53.7438	2.41379	44.5666	0.5612	14.4209	2.9667	9.2727	4.9967	7.3204	10.1272	2.7434	0.8641	2.1601	100	13.2712
	49	1150	608	-8.157	45.1473	2.5794	54.8527	2.66195	44.8771	0.5054	14.5006	2.937	9.0363	4.7881	7.0985	10.3691	2.8108	0.8647	2.2123	99.9999	12.9788
	50	1145	604	-8.219	44.0567	2.5685	55.9433	2.96688	45.2279	0.4543	14.5955	2.9032	8.7999	4.582	6.8424	10.619	2.8804	0.8306	2.2647	99.9999	12.6823
	51	1140	600	-8.281	43.0584	2.558	56.9416	3.30217	45.5685	0.4083	14.6864	2.8669	8.5611	4.3882	6.6004	10.8587	2.9472	0.7993	2.3151	100	12.3806
	52	1135	596	-8.344	42.1414	2.5479	57.8586	3.67113	45.8992	0.367	14.7732	2.8283	8.3213	4.2058	6.3713	11.0888	3.0113	0.7704	2.3635	100	12.0755
	53	1130	592	-8.407	41.2965	2.5383	58.7035	4.07568	46.2202	0.3298	14.8559	2.7877	8.0819	4.034	6.154	11.3097	3.0729	0.7437	2.4101	99.9999	11.7689
	54	1125	588	-8.471	40.5155	2.5289	59.4845	4.52064	46.5318	0.2965	14.9347	2.7455	7.8438	3.872	5.9476	11.522	3.1321	0.719	2.4549	99.9999	11.4621
	55	1120	584	-8.535	39.7915	2.52	60.2085	5.00726	46.8343	0.2665	15.0097	2.7018	7.6078	3.7192	5.7513	11.7261	3.1891	0.696	2.498	99.9998	11.1561
	56	1115	580	-8.599	39.1187	2.5114	60.8813	5.54115	47.128	0.2396	15.081	2.657	7.3746	3.5748	5.5642	11.9225	3.244	0.6747	2.5396	100	10.8522
	57	1110	576	-8.664	38.4919	2.5032	61.5081	6.12632	47.4131	0.2155	15.1489	2.6111	7.1448	3.4383	5.3857	12.1115	3.2968	0.6547	2.5796	100	10.5509
	58	1105	572	-8.729	37.9066	2.4952	62.0934	6.7655	47.6899	0.1939	15.2134	2.5644	6.9188	3.3091	5.2151	12.2936	3.3477	0.636	2.6182	100	10.2531
	59	1100	568	-8.795	37.359	2.4876	62.641	7.46277	47.9585	0.1745	15.2747	2.517	6.697	3.1866	5.052	12.469	3.3968	0.6185	2.6555	100	9.9592
	60	1095	564	-8.862	36.8455	2.4803	63.1545	8.22621	48.219	0.1571	15.3335	2.4692	6.48	3.0696	4.896	12.6381	3.4441	0.602	2.6914	100	9.67025
	61	1090	560	-8.929	36.3632	2.4733	63.6368	9.06358	48.4712	0.1416	15.3905	2.4214	6.2684	2.9562	4.7474	12.8012	3.4898	0.5863	2.7261	100	9.38731
	62	1085	556	-8.996	35.9096	2.4666	64.0904	9.977	48.7156	0.1277	15.4453	2.3734	6.0619	2.8474	4.6051	12.9585	3.5339	0.5715	2.7596	99.9999	9.10983
	63	1080	552	-9.064	35.4824	2.4601	64.5176	10.9749	48.9523	0.1153	15.4981	2.3255	5.8608	2.743	4.469	13.1103	3.5764	0.5574	2.792	100	8.83845
	64	1075	548	-9.132	35.0796	2.4539	64.9204	12.0642	49.1815	0.1041	15.5491	2.2777	5.6651	2.6428	4.3384	13.2567	3.6175	0.544	2.8232	100	8.57318
	65	1070	544	-9.201	34.6992	2.448	65.3008	13.2495	49.4033	0.0941	15.5982	2.23	5.4748	2.5466	4.2131	13.398	3.6571	0.5313	2.8534	99.9999	8.314
	66	1065	540	-9.27	34.3395	2.4423	65.6605	14.5445	49.6179	0.0852	15.6456	2.1827	5.2901	2.4543	4.0928	13.5344	3.6955	0.5192	2.8825	100	8.06145
	67	1060	536	-9.34	33.9992	2.4368	66.0008	15.9588	49.8254	0.0771	15.6915	2.1357	5.1108	2.3656	3.9771	13.6661	3.7324	0.5077	2.9106	100	7.8152
	68	1055	532	-9.41	33.6767	2.4315	66.3233	17.4944	50.0261	0.0699	15.7358	2.0891	4.937	2.2804	3.8659	13.7932	3.7682	0.4967	2.9378	100	7.57546
	69	1050	528	-9.481	33.3708	2.4265	66.6292	19.169	50.22	0.0634	15.7786	2.0431	4.7686	2.1985	3.7587	13.916	3.8027	0.4862	2.9641	99.9999	7.34232
	70	1045	524	-9.553	33.0805	2.4217	66.9195	20.9894	50.4074	0.0576	15.8201	1.9976	4.6055	2.1198	3.6555	14.0345	3.8361	0.4763	2.9895	99.9999	7.11557
	71	1040	520	-9.625	32.8046	2.417	67.1954	22.9774	50.5884	0.0523	15.8602	1.9527	4.4477	2.0442	3.5561	14.149	3.8684	0.4668	3.0141	99.9999	6.89531
	72	1035	516	-9.697	32.5422	2.4126	67.4578	25.1304	50.7633	0.0476	15.8992	1.9085	4.2951	1.9715	3.4601	14.2597	3.8996	0.4577	3.0379	100	6.68153
	73	1030	512	-9.771	32.2924	2.4084	67.7076	27.4789	50.9322	0.0433	15.9369	1.865	4.1475	1.9016	3.3674	14.3666	3.9297	0.449	3.0609	100	6.47401
	74	1025	508	-9.844	32.0545	2.4043	67.9455	30.0331	51.0952	0.0395	15.9735	1.8222	4.0049	1.8343	3.2779	14.4699	3.9589	0.4407	3.0831	100	6.27274
	75	1020	504	-9.919	31.8276	2.4004	68.1724	32.8095	51.2525	0.036	16.009	1.7801	3.8671	1.7696	3.1915	14.5697	3.9871	0.4328	3.1046	100	6.07751
	76	1015	500	-9.993	31.6112	2.3967	68.3888	35.8261	51.4044	0.0329	16.0435	1.7388	3.734	1.7072	3.1078	14.6663	4.0144	0.4252	3.1254	99.9999	5.8883
	77	1010	496	-10.069	31.4021	2.3931	68.5979	39.1111	51.5577	0.0302	16.0632	1.7012	3.6108	1.6431	3.0282	14.7608	4.0411	0.4179	3.1458	100	5.71379
	78	1005	492	-10.145	31.202	2.3897	68.798	42.6776	51.7064	0.0278	16.0816	1.6642	3.4918	1.5811	2.9513	14.8524	4.067	0.4109	3.1655	100	5.54454
	79	1000	488	-10.221	31.0105	2.3864	68.9895	46.5479	51.8506	0.0255	16.099	1.6279	3.3767	1.5212	2.877	14.941	4.0922	0.4042	3.1847	100	5.38034
	80	995	484	-10.299	30.8271	2.3832	69.1729	50.7692	51.9903	0.0235	16.1155	1.5923	3.2654	1.4634	2.8052	15.0269	4.1165	0.3978	3.2033	100	5.22105
	81	990	480	-10.376	30.6514	2.3802	69.3486	55.3605	52.1258	0.0217	16.1311	1.5575	3.1577	1.4076	2.7356	15.1101	4.1401	0.3916	3.2213	100	5.06657
	82	985	476	-10.455	30.4829	2.3773	69.5171	60.3671	52.257	0.02	16.1459	1.5232	3.0536	1.3537	2.6684	15.1907	4.163	0.3858	3.2388	100	4.91658
	83	980	472	-10.534	30.3212	2.3745	69.6788	65.8112	52.3842	0.0184	16.1599	1.4897	2.953	1.3016	2.6033	15.2688	4.1852	0.3802	3.2557	100	4.77129
	84	975	468	-10.614	30.1661	2.3718	69.8339	71.7299	52.5075	0.017	16.1733	1.4569	2.8557	1.2514	2.5402	15.3444	4.2067	0.3748	3.2721	100	4.63036
	85	970	464	-10.694	30.0171	2.3693	69.9829	78.1808	52.6269	0.0157	16.186	1.4247	2.7615	1.2029	2.4792	15.4178	4.2276	0.3697	3.2881	100	4.49348
	86	965	460	-10.775	29.8739	2.3668	70.1261	85.1922	52.7425	0.0145	16.1982	1.3932	2.6705	1.156	2.42	15.4889	4.2479	0.3649	3.3036	100	4.36086
	87	960	456	-10.857	29.7017	2.3644	70.2983	92.747	52.8561	0.0134	16.2076	1.3638	2.5858	1.1084	2.3644	15.559	4.261	0.36	3.3206	100	4.23733
	88	955	452	-10.939	29.1358	2.3602	70.8642	98.1296	53.1164	0.0127	15.9717	1.3622	2.5541	1.0462	2.3231	15.6407	4.2391	0.3565	3.3772	99.9999	4.2005
	89	950	448	-11.022	28.5963	2.356	71.4037	103.801	53.3774	0.0119	15.7381	1.3581	2.5174	0.9876	2.2833	15.7207	4.2185	0.3535	3.4336	100	4.15562
	90	945	444	-11.105	28.0816	2.3517	71.9184	109.774	53.6379	0.0112	15.5066	1.3518	2.4772	0.9322	2.2449	15.7989	4.1988	0.3507	3.4898	100	4.10465
	91	940	440	-11.19	27.5904	2.3475	72.4096	116.011	53.8973	0.0105	15.2772	1.3438	2.4342	0.88	2.2078	15.8751	4.1802	0.3483	3.5457	100	4.04886
	92	935	436	-11.275	27.1213	2.3434	72.8787	122.518	54.1553	0.0098	15.0498	1.3344	2.389	0.8307	2.1719	15.9494	4.1623	0.3462	3.6012	100	3.98923
	93	930	432	-11.361	26.6728	2.3392	73.3272	129.3	54.4115	0.0091	14.8243	1.3237	2.3422	0.7842	2.1372	16.0217	4.1453	0.3443	3.6564	99.9999	3.92652
	94	925	428	-11.447	26.2438	2.3352	73.7562	136.395	54.6657	0.0085	14.6008	1.312	2.294	0.7403	2.1035	16.0922	4.1291	0.3428	3.7112	100	3.86126
	95	920	424	-11.534	25.8332	2.3312	74.1668	143.747	54.9177	0.0078	14.3792	1.2993	2.2449	0.6988	2.0709	16.1609	4.1135	0.3415	3.7655	100	3.794
	96	915	420	-11.622	25.4398	2.3272	74.5602	151.391	55.1672	0.0072	14.1595	1.2858	2.1951	0.6596	2.0393	16.2278	4.0985	0.3404	3.8195	99.9999	3.72516
	97	910	416	-11.711	25.0627	2.3233	74.9373	159.368	55.4143	0.0067	13.9418	1.2715	2.1448	0.6226	2.0086	16.2929	4.0842	0.3396	3.873	100	3.65496
	98	905	412	-11.8	24.701	2.3195	75.299	167.61	55.6587	0.0061	13.726	1.2566	2.0942	0.5877	1.9788	16.3563	4.0704	0.3391	3.9261	100	3.58383
	99	900	408	-11.89	24.3537	2.3157	75.6463	176.157	55.9004	0.0056	13.5121	1.2411	2.0434	0.5547	1.9499	16.4181	4.0571	0.3388	3.9787	99.9999	3.51188
TIMBAS3 El Hierro cumulate	1	1385	800	-5.675	99.9723	2.8055	0.0276647	0.280867	43.8036	3.1009	8.91	2.1924	11.441	15.6721	10.9033	1.8122	0.7249	0.4329	1.0068	100	14.9065
	2	1380	796	-5.72	99.3496	2.8052	0.650441	0.294849	43.8227	3.1203	8.9658	2.2027	11.4525	15.4646	10.9696	1.8236	0.7294	0.4356	1.0131	99.9999	14.9296
	3	1375	792	-5.766	98.7375	2.8049	1.26252	0.309671	43.8419	3.1396	9.0214	2.2129	11.4632	15.2589	11.0355	1.8349	0.734	0.4383	1.0194	100	14.9517
	4	1370	788	-5.812	98.1358	2.8045	1.86415	0.325312	43.8612	3.1589	9.0767	2.2231	11.4729	15.0548	11.1011	1.8461	0.7385	0.441	1.0256	99.9999	14.9726
	5	1365	784	-5.858	97.5444	2.8042	2.45558	0.341822	43.8805	3.178	9.1317	2.2333	11.4818	14.8524	11.1664	1.8573	0.7429	0.4437	1.0318	99.9998	14.9927
	6	1360	780	-5.905	96.9629	2.8039	3.03705	0.359335	43.8999	3.1971	9.1865	2.2435	11.4899	14.6516	11.2313	1.8684	0.7474	0.4464	1.038	100	15.0119
	7	1355	776	-5.952	96.3912	2.8035	3.60878	0.377833	43.9193	3.2161	9.241	2.2536	11.497	14.4526	11.2959	1.8795	0.7518	0.449	1.0442	100	15.0299
	8	1350	772	-5.999	95.829	2.8032	4.17101	0.397375	43.9388	3.2349	9.2952	2.2637	11.5033	14.2552	11.3601	1.8906	0.7562	0.4516	1.0503	99.9999	15.047
	9	1345	768	-6.046	95.2761	2.8029	4.72393	0.418023	43.9584	3.2537	9.3491	2.2737	11.5087	14.0595	11.424	1.9015	0.7606	0.4543	1.0564	99.9999	15.063
	10	1340	764	-6.094	94.7322	2.8025	5.26778	0.439947	43.978	3.2724	9.4028	2.2838	11.5133	13.8654	11.4875	1.9124	0.765	0.4569	1.0625	100	15.0782
	11	1335	760	-6.142	94.1973	2.8022	5.80274	0.463234	43.9976	3.291	9.4562	2.2938	11.517	13.673	11.5507	1.9233	0.7693	0.4595	1.0685	99.9999	15.0923
	12	1330	756	-6.191	93.671	2.8018	6.32902	0.487753	44.0174	3.3095	9.5093	2.3038	11.5199	13.4823	11.6136	1.9341	0.7737	0.462	1.0745	100	15.1056
	13	1325	752	-6.239	93.1532	2.8015	6.84682	0.513807	44.0371	3.3279	9.5622	2.3137	11.5219	13.2932	11.6761	1.9449	0.778	0.4646	1.0805	100	15.1177
	14	1320	748	-6.288	92.6437	2.8011	7.35632	0.541502	44.0569	3.3462	9.6148	2.3237	11.523	13.1057	11.7383	1.9556	0.7822	0.4672	1.0864	100	15.1289
	15	1315	744	-6.338	92.1423	2.8008	7.85771	0.57069	44.0768	3.3644	9.6671	2.3336	11.5233	12.9199	11.8002	1.9662	0.7865	0.4697	1.0923	100	15.1391
	16	1310	740	-6.387	91.6488	2.8004	8.35115	0.601728	44.0967	3.3825	9.7192	2.3435	11.5227	12.7358	11.8617	1.9768	0.7907	0.4722	1.0982	100	15.1484
	17	1305	736	-6.437	91.1632	2.8	8.83684	0.634746	44.1167	3.4005	9.7709	2.3534	11.5213	12.5532	11.9229	1.9873	0.7949	0.4748	1.1041	100	15.1567
	18	1300	732	-6.487	90.6851	2.7997	9.31493	0.66973	44.1368	3.4184	9.8225	2.3632	11.519	12.3723	11.9837	1.9978	0.7991	0.4773	1.1099	100	15.164
	19	1295	728	-6.538	90.2144	2.7993	9.7856	0.706806	44.1568	3.4363	9.8737	2.3731	11.5159	12.1931	12.0442	2.0082	0.8033	0.4797	1.1157	100	15.1704
	20	1290	724	-6.589	89.751	2.7989	10.249	0.746277	44.177	3.454	9.9247	2.3829	11.5119	12.0154	12.1044	2.0186	0.8075	0.4822	1.1214	100	15.1758
	21	1285	720	-6.64	89.2947	2.7985	10.7053	0.788315	44.1972	3.4716	9.9754	2.3927	11.5071	11.8394	12.1643	2.0289	0.8116	0.4847	1.1272	100	15.1802
	22	1280	716	-6.691	88.8454	2.7982	11.1546	0.832722	44.2174	3.4892	10.0258	2.4025	11.5014	11.665	12.2238	2.0392	0.8157	0.4871	1.1329	100	15.1837
	23	1275	712	-6.743	88.4029	2.7978	11.5971	0.880035	44.2377	3.5067	10.076	2.4122	11.4949	11.4922	12.283	2.0494	0.8198	0.4896	1.1385	100	15.1862
	24	1270	708	-6.795	87.967	2.7974	12.033	0.930465	44.2581	3.524	10.126	2.422	11.4876	11.321	12.3418	2.0595	0.8238	0.492	1.1442	100	15.1879
	25	1265	704	-6.848	87.5377	2.797	12.4623	0.984011	44.2785	3.5413	10.1756	2.4317	11.4793	11.1514	12.4004	2.0696	0.8279	0.4944	1.1498	99.9999	15.1883
	26	1260	700	-6.901	87.1147	2.7966	12.8853	1.04112	44.2989	3.5585	10.225	2.4414	11.4703	10.9834	12.4586	2.0797	0.8319	0.4968	1.1554	99.9999	15.188
	27	1255	696	-6.954	86.698	2.7962	13.302	1.10179	44.3195	3.5756	10.2742	2.4511	11.4604	10.817	12.5165	2.0897	0.8359	0.4992	1.1609	100	15.1867
	28	1250	692	-7.007	84.6584	2.7962	15.3416	1.12876	44.1789	3.6403	10.4227	2.4746	11.6029	10.6106	12.3796	2.1341	0.856	0.5112	1.1889	99.9998	15.3686
	29	1245	688	-7.061	82.6202	2.7961	17.3798	1.15505	44.0353	3.706	10.5737	2.4985	11.7515	10.4038	12.2315	2.1806	0.8771	0.5238	1.2182	100	15.5576
	30	1240	684	-7.116	80.6583	2.796	19.3417	1.1825	43.8964	3.7703	10.7223	2.522	11.8989	10.1985	12.0816	2.2272	0.8985	0.5366	1.2479	100	15.7449
	31	1235	680	-7.17	78.7674	2.7958	21.2326	1.21116	43.7624	3.8329	10.8686	2.5451	12.045	9.9947	11.9297	2.2743	0.9201	0.5495	1.2778	100	15.9304
	32	1230	676	-7.225	76.9423	2.7955	23.0577	1.24137	43.6335	3.8938	11.0124	2.568	12.19	9.7922	11.7759	2.3216	0.9419	0.5625	1.3081	99.9999	16.1144
	33	1225	672	-7.281	75.1779	2.7951	24.8221	1.27321	43.51	3.9528	11.1538	2.5906	12.3339	9.5911	11.6198	2.3695	0.964	0.5757	1.3388	100	16.2969
	34	1220	668	-7.336	73.4695	2.7946	26.5305	1.30647	43.3922	4.0096	11.2928	2.6129	12.4768	9.3911	11.4614	2.4177	0.9864	0.5891	1.37	100	16.478
	35	1215	664	-7.392	71.8122	2.794	28.1878	1.34184	43.2806	4.0639	11.4293	2.635	12.6189	9.1921	11.3003	2.4666	1.0092	0.6027	1.4016	100	16.658
	36	1210	660	-7.449	70.2013	2.7933	29.7987	1.37911	43.1756	4.1153	11.5632	2.6568	12.7602	8.9939	11.1364	2.5161	1.0323	0.6165	1.4337	100	16.8369
	37	1205	656	-7.506	68.6317	2.7924	31.3683	1.41906	43.0781	4.1634	11.6944	2.6785	12.9009	8.7962	10.9691	2.5663	1.0559	0.6306	1.4665	99.9999	17.0149
	38	1200	652	-7.563	67.0977	2.7914	32.9023	1.46184	42.9889	4.2075	11.8227	2.7	13.0414	8.5988	10.7979	2.6175	1.0801	0.645	1.5001	99.9999	17.1926
	39	1195	648	-7.621	65.5929	2.7902	34.4071	1.508	42.9097	4.2468	11.948	2.7214	13.1819	8.4012	10.6221	2.6698	1.1048	0.6598	1.5345	100	17.3701
	40	1190	644	-7.679	64.1093	2.7888	35.8907	1.55812	42.8425	4.2796	12.0696	2.7428	13.323	8.2027	10.4406	2.7236	1.1304	0.6751	1.57	99.9999	17.5483
	41	1185	640	-7.737	62.6352	2.7871	37.3648	1.61399	42.7915	4.3037	12.1868	2.7642	13.4654	8.0024	10.2517	2.7794	1.157	0.691	1.6069	100	17.7279
	42	1180	636	-7.796	58.8337	2.7635	41.1663	1.94626	43.512	4.0437	12.4454	2.7016	13.0075	7.6612	10.0091	2.9414	1.2318	0.7356	1.7108	100	17.1565
	43	1175	632	-7.855	54.9564	2.7349	45.0436	2.44118	44.4077	3.7318	12.7569	2.6133	12.3828	7.2713	9.7684	3.1302	1.3187	0.7875	1.8315	100	16.374
	44	1170	628	-7.915	51.6155	2.7075	48.3845	3.0507	45.2724	3.4397	13.0707	2.5218	11.7585	6.8929	9.536	3.3154	1.404	0.8385	1.95	99.9999	15.5887
	45	1165	624	-7.975	48.7823	2.6821	51.2177	3.77659	46.0816	3.1744	13.3747	2.4311	11.1604	6.5358	9.3138	3.4922	1.4856	0.8872	2.0633	100	14.8334
	46	1160	620	-8.035	46.3872	2.6588	53.6128	4.62168	46.8263	2.9371	13.6626	2.3436	10.6008	6.2037	9.1027	3.6582	1.5623	0.933	2.1698	100	14.124
	47	1155	616	-8.096	44.3528	2.6376	55.6472	5.58856	47.5072	2.7261	13.9323	2.2603	10.0829	5.8968	8.9023	3.813	1.6339	0.9758	2.2693	99.9999	13.4652
	48	1150	612	-8.157	42.6097	2.6184	57.3903	6.68498	48.1295	2.5384	14.1836	2.1816	9.6052	5.6136	8.7123	3.9571	1.7008	1.0157	2.3621	99.9999	12.8556
	49	1145	608	-8.219	41.1013	2.6009	58.8987	7.91954	48.6999	2.3708	14.4176	2.1073	9.1645	5.3518	8.5316	4.0915	1.7632	1.053	2.4488	100	12.2916
	50	1140	604	-8.281	39.7828	2.5849	60.2172	9.30037	49.2246	2.2204	14.6357	2.0373	8.7569	5.109	8.3596	4.217	1.8216	1.0879	2.53	100	11.7686
	51	1135	600	-8.344	38.6197	2.5703	61.3803	10.8418	49.7096	2.0847	14.8393	1.971	8.3785	4.8833	8.1955	4.3347	1.8765	1.1207	2.6062	100	11.2818
	52	1130	596	-8.407	37.5481	2.5564	62.4519	12.659	50.1929	1.9604	15.0409	1.9067	8.0251	4.6711	8.0122	4.4495	1.9301	1.1315	2.6797	100	10.8248
	53	1125	592	-8.471	36.5046	2.5427	63.4954	14.9796	50.7253	1.8449	15.2574	1.8419	7.6932	4.469	7.7709	4.5679	1.9852	1.091	2.7532	99.9999	10.3911
	54	1120	588	-8.535	35.5746	2.5301	64.4254	17.6035	51.2197	1.7401	15.4599	1.781	7.3839	4.2797	7.5432	4.6791	2.0371	1.0538	2.8224	99.9999	9.98653
	55	1115	584	-8.599	34.7393	2.5185	65.2607	20.5636	51.681	1.6444	15.6499	1.7237	7.0943	4.1019	7.3276	4.7839	2.0861	1.0194	2.8877	99.9999	9.60741
	56	1110	580	-8.664	33.977	2.5076	66.023	23.9056	52.1106	1.558	15.8323	1.6697	6.8216	3.9257	7.1284	4.8841	2.1329	0.9866	2.9501	100	9.25036
	57	1105	576	-8.729	33.2817	2.4974	66.7183	27.6694	52.5138	1.4785	16.0053	1.6186	6.5646	3.7566	6.9404	4.9793	2.1775	0.9558	3.0096	100	8.91367
	58	1100	572	-8.795	32.6467	2.4878	67.3533	31.886	52.8944	1.4047	16.168	1.57	6.3221	3.5979	6.7601	5.0697	2.2198	0.9272	3.0661	100	8.59558
	59	1095	568	-8.862	32.064	2.4788	67.936	36.61	53.255	1.3357	16.3213	1.5237	6.0926	3.4486	6.5869	5.1556	2.2602	0.9005	3.12	100	8.29424
	60	1090	564	-8.929	31.5269	2.4704	68.4731	41.8986	53.5973	1.2711	16.4661	1.4794	5.8747	3.3078	6.4202	5.2374	2.2987	0.8757	3.1715	99.9999	8.0078
	61	1085	560	-8.996	31.0299	2.4624	68.9701	47.7969	53.9232	1.2105	16.6032	1.4371	5.6676	3.1748	6.2595	5.3155	2.3355	0.8524	3.2207	100	7.73535
	62	1080	556	-9.064	30.5683	2.4549	69.4317	54.4001	54.2341	1.1535	16.7331	1.3965	5.4701	3.0489	6.1046	5.3902	2.3708	0.8305	3.2679	100	7.47528
	63	1075	552	-9.132	30.1383	2.4477	69.8617	61.759	54.5311	1.0998	16.8563	1.3575	5.2815	2.9296	5.9549	5.4617	2.4046	0.8099	3.3131	100	7.22669
	64	1070	548	-9.201	29.7366	2.441	70.2634	69.952	54.8155	1.049	16.9735	1.3199	5.1012	2.8163	5.8102	5.5302	2.4371	0.7905	3.3566	100	6.98873
	65	1065	544	-9.27	29.3603	2.4345	70.6397	79.1043	55.0882	1.0009	17.085	1.2838	4.9284	2.7087	5.6702	5.5959	2.4683	0.7722	3.3984	100	6.7606
	66	1060	540	-9.34	29.007	2.4283	70.993	89.2894	55.35	0.9554	17.1911	1.2489	4.7627	2.6063	5.5346	5.659	2.4984	0.7549	3.4387	100	6.54156
	67	1055	536	-9.41	28.6745	2.4225	71.3255	100.624	55.6016	0.9122	17.2923	1.2153	4.6036	2.5088	5.4032	5.7198	2.5273	0.7385	3.4775	100	6.33116
	68	1050	532	-9.481	28.361	2.4169	71.639	113.24	55.8438	0.8711	17.3889	1.1827	4.4505	2.4158	5.2757	5.7782	2.5553	0.723	3.5149	99.9999	6.12842
	69	1045	528	-9.553	28.0648	2.4115	71.9352	127.262	56.0771	0.8321	17.4811	1.1512	4.3032	2.3271	5.1521	5.8345	2.5822	0.7083	3.5511	100	5.93323
	70	1040	524	-9.625	27.7846	2.4064	72.2154	142.856	56.302	0.795	17.5691	1.1207	4.1612	2.2423	5.0321	5.8887	2.6083	0.6944	3.586	99.9998	5.74493
	71	1035	520	-9.697	27.519	2.4015	72.481	160.214	56.5191	0.7597	17.6534	1.0912	4.0243	2.1614	4.9156	5.9411	2.6335	0.6811	3.6198	100	5.5633
	72	1030	516	-9.771	27.2669	2.3968	72.7331	179.473	56.7288	0.726	17.7339	1.0625	3.8922	2.084	4.8023	5.9916	2.6578	0.6685	3.6524	100	5.3878
	73	1025	512	-9.844	26.9179	2.3915	73.0821	197.469	56.9475	0.6914	17.7512	1.0377	3.7712	2.0123	4.6973	6.0429	2.6913	0.6582	3.699	100	5.22853
	74	1020	508	-9.919	26.2714	2.3835	73.7286	208.065	57.2126	0.6722	17.6317	1.0102	3.6302	1.9542	4.5887	6.1021	2.7539	0.6551	3.7892	100	5.04435
	75	1015	504	-9.993	25.6528	2.3757	74.3472	218.575	57.4691	0.654	17.5126	0.9828	3.4927	1.8986	4.4824	6.1588	2.8165	0.6527	3.8798	100	4.86414
	76	1010	500	-10.069	25.0619	2.368	74.9381	228.981	57.7174	0.6356	17.3945	0.9562	3.3608	1.8448	4.3771	6.2133	2.8791	0.6508	3.9705	100	4.69097
	77	1005	496	-10.145	24.4958	2.3605	75.5042	239.276	57.9573	0.6175	17.2766	0.93	3.2333	1.793	4.2739	6.2654	2.9417	0.6496	4.0616	99.9999	4.52308
	78	1000	492	-10.221	23.953	2.3532	76.047	249.287	58.1892	0.5999	17.1587	0.9044	3.1102	1.7432	4.1728	6.3152	3.0044	0.649	4.153	100	4.36068
	79	995	488	-10.299	23.4319	2.346	76.5681	259.06	58.4131	0.5828	17.0409	0.8793	2.9913	1.6953	4.0738	6.3627	3.0671	0.6489	4.2447	99.9999	4.20345
	80	990	484	-10.376	22.9312	2.3389	77.0688	268.534	58.6292	0.5661	16.9231	0.8548	2.8765	1.6491	3.977	6.408	3.1299	0.6495	4.3368	100	4.05138
	81	985	480	-10.455	22.4496	2.332	77.5504	277.651	58.8378	0.5499	16.8052	0.8307	2.7656	1.6046	3.8825	6.451	3.1927	0.6507	4.4293	100	3.90404
	82	980	476	-10.534	21.986	2.3252	78.014	286.286	59.0388	0.5341	16.6872	0.8072	2.6586	1.5617	3.7902	6.4917	3.2556	0.6525	4.5222	99.9998	3.76163
	83	975	472	-10.614	21.5391	2.3185	78.4609	294.51	59.2325	0.5189	16.5692	0.7841	2.5552	1.5203	3.7002	6.5303	3.3187	0.655	4.6156	100	3.62363
	84	970	468	-10.694	21.1081	2.312	78.8919	302.204	59.419	0.504	16.451	0.7616	2.4554	1.4804	3.6125	6.5667	3.3818	0.6581	4.7094	99.9999	3.49022
	85	965	464	-10.775	20.692	2.3055	79.308	309.386	59.5984	0.4897	16.3326	0.7396	2.3591	1.4419	3.5272	6.6009	3.445	0.6618	4.8037	99.9999	3.36121
	86	960	460	-10.857	20.2899	2.2992	79.7101	316.009	59.7709	0.4758	16.2141	0.7181	2.2661	1.4047	3.4442	6.633	3.5084	0.6662	4.8985	100	3.23636
	87	955	456	-10.939	19.9009	2.293	80.0991	322.033	59.9364	0.4623	16.0953	0.697	2.1763	1.3688	3.3637	6.6629	3.572	0.6713	4.9939	99.9999	3.11546
	88	950	452	-11.022	19.5245	2.2869	80.4755	327.416	60.0952	0.4492	15.9762	0.6765	2.0897	1.3342	3.2856	6.6907	3.6357	0.6771	5.0899	100	2.99873
	89	945	448	-11.105	19.1597	2.2809	80.8403	332.047	60.2472	0.4366	15.8569	0.6564	2.006	1.3007	3.21	6.7164	3.6996	0.6837	5.1866	100	2.88561
	90	940	444	-11.19	18.8061	2.2749	81.1939	336.047	60.3926	0.4243	15.7373	0.6367	1.9252	1.2683	3.1369	6.74	3.7637	0.6911	5.2839	100	2.77612
	91	935	440	-11.275	18.4629	2.2691	81.5371	339.391	60.5314	0.4125	15.6173	0.6175	1.8472	1.237	3.0665	6.7615	3.828	0.6992	5.3819	100	2.67024
	92	930	436	-11.361	18.1296	2.2634	81.8704	341.901	60.6637	0.401	15.497	0.5988	1.7719	1.2067	2.9986	6.781	3.8925	0.7082	5.4807	100	2.56787
	93	925	432	-11.447	17.8057	2.2577	82.1943	343.716	60.7894	0.39	15.3762	0.5805	1.6992	1.1774	2.9335	6.7983	3.9573	0.7182	5.5802	100	2.46878
	94	920	428	-11.534	17.4907	2.2521	82.5093	344.747	60.9086	0.3792	15.2549	0.5626	1.629	1.1491	2.8711	6.8136	4.0223	0.729	5.6806	100	2.37286
	95	915	424	-11.622	17.1841	2.2466	82.8159	345.064	61.0213	0.3689	15.1331	0.5451	1.5612	1.1217	2.8115	6.8268	4.0877	0.7409	5.782	100	2.28002
	96	910	420	-11.711	16.8855	2.2412	83.1145	344.588	61.1274	0.3588	15.0107	0.5281	1.4958	1.0952	2.7548	6.8379	4.1533	0.7538	5.8842	100	2.19034
	97	905	416	-11.8	16.5707	2.2357	83.4293	345.144	61.2668	0.3462	14.8661	0.514	1.4404	1.0598	2.6979	6.8494	4.2039	0.7673	5.9879	99.9997	2.11468
	98	900	412	-11.89	16.2318	2.23	83.7682	343.716	61.4116	0.312	14.7139	0.512	1.4205	0.9947	2.6381	6.8649	4.2517	0.78	6.1006	100	2.09056
Ol olivine; Cpx clinopyroxene; Opx orthopyroxene; Sp spinel; Fsp feldspar; Ap apatite; Ilm ilmenite; Wht whitlockite; Grt garnet
Mg# of Cpx = Mg/(Mg+FeT), where concentrations are expressed on a molar basis and FeT represents total iron
Fe2O3T= Fe2O3 + (FeO*1.11127349)

## Sheet: Table S6
Table S6. Global database of volcanic compositions from ocean islands. Citations (column E) are provided below the table. The database contains bulk rock and glass compositions from volcanic samples in Atlantic, Pacific and Indian ocean islands. We used GEOROC ([Geochemistry of Rocks of the Oceans and Continents], http://georoc.mpch-mainz.gwdg.de/georoc/) as well as previous compilations by Larre…
OCEAN	LOCATION	LOCATION DETAILS	SOURCE	CITATIONS	LATITUDE MIN	LATITUDE MAX	LONGITUDE MIN	LONGITUDE MAX	SAMPLE NAME	ROCK NAME	ROCK TEXTURE	TYPE	MATERIAL	SiO2_wt%	TiO2_wt%	B2O3_wt%	Al2O3_wt%	Cr2O3_wt%	Fe2O3T_wt%	Fe2O3_wt%	FeO_wt%	FeOT_wt%	CaO_wt%	MgO_wt%	MnO_wt%	NiO_wt%	K2O_wt%	Na2O_wt%	P2O5_wt%	H2O_wt%	H2OP_wt%	H2OM_wt%	H2OT_wt%	CO2_wt%	CO1_wt%	F_wt%	Cl_wt%	Cl2_wt%	OH_wt%	CH4_wt%	SO2_wt%	SO3_wt%	SO4_wt%	S_wt%	LOI_wt%	UNIQUE_ID	AFFINITY
Atlantic	Canary Islands	Tenerife / Siete Fuentes	Georoc 2020	[19988]	28.3	28.3	-16.6	-16.6	s_1704	Tephrite		VOLCANIC ROCK	WR [19988]	44.4	3.65		15.16					12.1	10.67	7.5	0.19		1.59	3.87	0.76																	1002844
Atlantic	Canary Islands	Tenerife / Fasnia	Georoc 2020	[19988]	28.3	28.3	-16.6	-16.6	s_1705	Tephrite		VOLCANIC ROCK	WR [19988]	44.4	3.7		14.99					12.1	10.67	7.7	0.19		1.54	3.82	0.76																	1002845
Atlantic	Canary Islands	Tenerife / Arafo	Georoc 2020	[19988]	28.3	28.3	-16.6	-16.6	s_1705	Tephrite		VOLCANIC ROCK	WR [19988]	44	3.56		14.1					12.39	10.58	9.4	0.19		1.42	3.57	0.72																	1002846
Atlantic	Canary Islands	Tenerife / Las Canadas Caldera / Enramada Unit	Georoc 2020	[19991]	28.3	28.3	-16.6	-16.6	s_001	Phonolite		VOLCANIC ROCK	WR [19991]	62.45	0.8		17.34					2.86	0.78	0.63	0.16		5.35	7.58	0.17																	1006931
Atlantic	Canary Islands	Tenerife / Las Canadas Caldera / Enramada Unit	Georoc 2020	[19991]	28.3	28.3	-16.6	-16.6	s_002	Phonolite		VOLCANIC ROCK	WR [19991]	62.87	0.82		17.38					2.96	1.49	0.6	0.17		5.43	7.62	0.17																	1006932
Atlantic	Canary Islands	Tenerife / Las Canadas Caldera / Enramada Unit	Georoc 2020	[19991]	28.3	28.3	-16.6	-16.6	s_007	Phonolite		VOLCANIC ROCK	WR [19991]	63.58	0.82		17.73					2.9	0.8	0.58	0.16		5.37	7.78	0.17																	1006933
Atlantic	Canary Islands	Tenerife / Las Canadas Caldera / Adeje Unit	Georoc 2020	[19991]	28.3	28.3	-16.6	-16.6	s_009	Phonolite		VOLCANIC ROCK	WR [19991]	62	0.92		17.96					3.33	1.57	0.98	0.18		4.19	7.95	0.22																	1006934
Atlantic	Canary Islands	Tenerife / Las Canadas Caldera / Adeje Unit	Georoc 2020	[19991]	28.3	28.3	-16.6	-16.6	s_010	Phonolite		VOLCANIC ROCK	WR [19991]	61.17	1.02		17.99					3.55	1.98	1.08	0.17		3.99	7.96	0.26																	1006935
Atlantic	Canary Islands	Tenerife / Las Canadas Caldera / Adeje Unit	Georoc 2020	[19991]	28.3	28.3	-16.6	-16.6	s_015	Phonolite		VOLCANIC ROCK	WR [19991]	60.43	0.87		17.49					3.06	4.04	0.84	0.17		4.15	8.11	0.2																	1006936
Atlantic	Canary Islands	Tenerife / Las Canadas Caldera / Morteros Unit	Georoc 2020	[19991]	28.3	28.3	-16.6	-16.6	s_017	Phonolite		VOLCANIC ROCK	WR [19991]	63.67	0.79		17.33					3.27	1	0.56	0.23		5.47	7.53	0.08																	1006937
Atlantic	Canary Islands	Tenerife / Las Canadas Caldera / Morteros Unit	Georoc 2020	[19991]	28.3	28.3	-16.6	-16.6	s_018	Phonolite		VOLCANIC ROCK	WR [19991]	62.02	0.76		16.91					3.62	1.33	0.4	0.28		5.32	8.85	0.06																	1006938
Atlantic	Canary Islands	Tenerife / Las Canadas Caldera / Gaviota Unit	Georoc 2020	[19991]	28.3	28.3	-16.6	-16.6	s_019	Phonolite		VOLCANIC ROCK	WR [19991]	60.08	0.85		19.1					3.05	1.67	0.64	0.18		4.98	8.31	0.13																	1006939
Atlantic	Canary Islands	Tenerife / Las Canadas Caldera / Gaviota Unit	Georoc 2020	[19991]	28.3	28.3	-16.6	-16.6	s_020	Phonolite		VOLCANIC ROCK	WR [19991]	58.81	1.12		19.29					3.84	3.05	0.98	0.18		4.14	7.67	0.23																	1006940
Atlantic	Canary Islands	Tenerife / Las Canadas Caldera / Gaviota Unit	Georoc 2020	[19991]	28.3	28.3	-16.6	-16.6	s_022	Phonolite		VOLCANIC ROCK	WR [19991]	59.11	1.08		19.21					3.71	2.78	1.12	0.18		4.3	7.71	0.26																	1006941
Atlantic	Canary Islands	Tenerife / Las Canadas Caldera / Gaviota Unit	Georoc 2020	[19991]	28.3	28.3	-16.6	-16.6	s_023	Phonolite		VOLCANIC ROCK	WR [19991]	58.03	1.13		19.24					3.82	4.21	1.21	0.18		3.87	7.47	0.37																	1006942
Atlantic	Canary Islands	Tenerife / Las Canadas Caldera / Gaviota Unit	Georoc 2020	[19991]	28.3	28.3	-16.6	-16.6	s_023-2	Phonolite		VOLCANIC ROCK	WR [19991]	58.54	1.11		19.06					3.71	3.5	1.11	0.18		4.15	7.64	0.3																	1006943
Atlantic	Canary Islands	Tenerife / Las Canadas Caldera / Gaviota Unit	Georoc 2020	[19991]	28.3	28.3	-16.6	-16.6	s_024	Phonolite		VOLCANIC ROCK	WR [19991]	58.98	1.07		19.26					3.7	2.93	0.94	0.18		4.3	7.81	0.22																	1006944
Atlantic	Canary Islands	Tenerife / Las Canadas Caldera / Arico Unit	Georoc 2020	[19991]	28.3	28.3	-16.6	-16.6	s_031	Phonolite		VOLCANIC ROCK	WR [19991]	61.52	0.85		18.29					3.1	0.98	0.81	0.21		4.87	8.91	0.16																	1006945
Atlantic	Canary Islands	Tenerife / Las Canadas Caldera / Arico Unit	Georoc 2020	[19991]	28.3	28.3	-16.6	-16.6	s_032	Phonolite		VOLCANIC ROCK	WR [19991]	61.45	0.89		18.34					3.14	1.08	0.78	0.21		4.76	8.96	0.17																	1006946
Atlantic	Canary Islands	Tenerife / Las Canadas Caldera / El Abrigo Unit	Georoc 2020	[19991]	28.3	28.3	-16.6	-16.6	s_036	Phonolite		VOLCANIC ROCK	WR [19991]	59.02	0.89		18.32					3.08	2.16	0.73	0.18		5.11	8.37	0.16																	1006947
Atlantic	Canary Islands	Tenerife / Las Canadas Caldera / El Abrigo Unit	Georoc 2020	[19991]	28.3	28.3	-16.6	-16.6	s_043	Phonolite		VOLCANIC ROCK	WR [19991]	60.05	1.02		19.07					2.96	1.89	0.64	0.13		5.74	7.54	0.14																	1006948
Atlantic	Canary Islands	Tenerife / Las Canadas Caldera / El Abrigo Unit	Georoc 2020	[19991]	28.3	28.3	-16.6	-16.6	s_044	Phonolite		VOLCANIC ROCK	WR [19991]	55.38	1.71		18.93					5.11	4.43	1.79	0.17		4.33	7.19	0.49																	1006949
Atlantic	Canary Islands	Tenerife / Las Canadas Caldera / El Abrigo Unit	Georoc 2020	[19991]	28.3	28.3	-16.6	-16.6	s_045	Phonolite		VOLCANIC ROCK	WR [19991]	57.24	0.61		20.27					2.88	3.65	0.74	0.18		5.49	8.61	0.11																	1006950
Atlantic	Canary Islands	Tenerife / Las Canadas Caldera / El Abrigo Unit	Georoc 2020	[19991]	28.3	28.3	-16.6	-16.6	s_046	Phonolite		VOLCANIC ROCK	WR [19991]	57.73	0.74		19.73					3.09	2.13	0.72	0.18		5.41	8.59	0.13																	1006951
Atlantic	Canary Islands	Tenerife / Las Canadas Caldera / El Abrigo Unit	Georoc 2020	[19991]	28.3	28.3	-16.6	-16.6	s_047	Phonolite		VOLCANIC ROCK	WR [19991]	60.7	0.79		18.55					2.83	1.22	0.47	0.18		5.71	8.56	0.1																	1006952
Atlantic	Canary Islands	Tenerife / Las Canadas Caldera / El Abrigo Unit	Georoc 2020	[19991]	28.3	28.3	-16.6	-16.6	s_048	Phonolite		VOLCANIC ROCK	WR [19991]	60.5	0.86		18.69					3.1	1.6	0.58	0.19		5.47	8.73	0.13																	1006953
Atlantic	Canary Islands	Tenerife / Las Canadas Caldera / El Abrigo Unit	Georoc 2020	[19991]	28.3	28.3	-16.6	-16.6	s_049	Phonolite		VOLCANIC ROCK	WR [19991]	57.3	1.4		18.36					4.47	3.21	1.38	0.19		4.56	7.95	0.35																	1006954
Atlantic	Canary Islands	Tenerife / Las Canadas Caldera / El Abrigo Unit	Georoc 2020	[19991]	28.3	28.3	-16.6	-16.6	s_050	Phonolite		VOLCANIC ROCK	WR [19991]	58.57	0.74		18.71					3.38	2.09	0.61	0.23		5.51	8.94	0.1																	1006955
Atlantic	Canary Islands	Tenerife / Las Canadas Caldera / El Abrigo Unit	Georoc 2020	[19991]	28.3	28.3	-16.6	-16.6	s_051	Phonolite		VOLCANIC ROCK	WR [19991]	60.28	1.08		18.71					3.47	1.96	0.9	0.17		5.05	8.03	0.23																	1006956
Atlantic	Canary Islands	Tenerife / Las Canadas Caldera / El Abrigo Unit	Georoc 2020	[19991]	28.3	28.3	-16.6	-16.6	s_053	Phonolite		VOLCANIC ROCK	WR [19991]	61.4	0.86		18.56					2.88	1.2	0.57	0.17		5.64	8.24	0.14																	1006957
Atlantic	Canary Islands	Tenerife / Las Canadas Caldera / El Abrigo Unit	Georoc 2020	[19991]	28.3	28.3	-16.6	-16.6	s_054	Phonolite		VOLCANIC ROCK	WR [19991]	60.34	0.89		18.63					3.02	1.49	0.64	0.17		5.27	8.37	0.15																	1006958
Atlantic	Canary Islands	Tenerife / Las Canadas Caldera / El Abrigo Unit	Georoc 2020	[19991]	28.3	28.3	-16.6	-16.6	s_055	Phonolite		VOLCANIC ROCK	WR [19991]	59.4	0.75		18.9					3.14	1.5	0.41	0.22		5.66	9.37	0.07																	1006959
Atlantic	Canary Islands	Tenerife / Las Canadas Caldera / El Abrigo Unit	Georoc 2020	[19991]	28.3	28.3	-16.6	-16.6	s_057	Phonolite		VOLCANIC ROCK	WR [19991]	61.43	0.84		18.59					2.76	1.58	0.62	0.16		5.58	8.17	0.13																	1006960
Atlantic	Canary Islands	Tenerife / Las Canadas Caldera / El Abrigo Unit	Georoc 2020	[19991]	28.3	28.3	-16.6	-16.6	s_059	Phonolite		VOLCANIC ROCK	WR [19991]	59.29	0.98		18.46					3.34	2.9	0.79	0.19		5.2	8.46	0.19																	1006961
Atlantic	Canary Islands	La Palma / Cumbre Vieja / Ad 1585 Eruption	Georoc 2020	[19993]	28.56	28.56	-19	-19	s_TLP 104-1	Basanite		VOLCANIC ROCK	WR [19993]	44.31	3.69		14.18			2.51	10.04		11.15	7.51	0.2		1.72	3.87	0.82	0.13				0.03												1007142
Atlantic	Canary Islands	La Palma / Cumbre Vieja / Ad 1585 Eruption	Georoc 2020	[19993]	28.56	28.56	-19	-19	s_TLP 93-1	Basanite		VOLCANIC ROCK	WR [19993]	44.3	3.69		14.23			2.51	10.05		11.11	7.39	0.2		1.72	3.96	0.83	0.18				0.02												1007143
Atlantic	Canary Islands	La Palma / Cumbre Vieja / Ad 1585 Eruption	Georoc 2020	[19993]	28.56	28.56	-19	-19	s_TLP 50-2	Basanite		VOLCANIC ROCK	WR [19993]	44.49	3.68		14.46			2.51	10.05		11.03	7.14	0.19		1.79	3.83	0.83	0.23				0.05												1007144
Atlantic	Canary Islands	La Palma / Cumbre Vieja / Ad 1585 Eruption	Georoc 2020	[19993]	28.56	28.56	-19	-19	s_TLP 51-3	Tephrite		VOLCANIC ROCK	WR [19993]	46.83	3.22		17.11			2.13	8.5		9.05	3.93	0.21		2.53	5.62	0.88	0.26				0.03												1007145
Atlantic	Canary Islands	La Palma / Cumbre Vieja / Ad 1585 Eruption	Georoc 2020	[19993]	28.56	28.56	-19	-19	s_TLP 105-1	Tephrite		VOLCANIC ROCK	WR [19993]	47.13	3.12		17.3			2.04	8.16		8.76	3.85	0.21		2.64	5.89	0.89	0.29				0.02												1007146
Atlantic	Canary Islands	La Palma / Cumbre Vieja / Ad 1585 Eruption	Georoc 2020	[19993]	28.56	28.56	-19	-19	s_TLP 51-1	Phonolite, Tephri		VOLCANIC ROCK	WR [19993]	53.46	1.63		19.58			1.22	4.88		5.21	1.82	0.18		3.75	7.83	0.44	0.31				0.01												1007147
Atlantic	Canary Islands	La Palma / Cumbre Vieja / Ad 1585 Eruption	Georoc 2020	[19993]	28.56	28.56	-19	-19	s_TLP 50-4	Phonolite		VOLCANIC ROCK	WR [19993]	55.92	1.07		20.28			0.9	3.59		3.76	1.06	0.17		4.38	8.61	0.27	0.25				0.03												1007148
Atlantic	Canary Islands	La Palma / Cumbre Vieja / Ad 1585 Eruption	Georoc 2020	[19993]	28.56	28.56	-19	-19	s_TLP 50-6	Phonolite		VOLCANIC ROCK	WR [19993]	55.81	1.09		20.22			0.92	3.69		3.7	1.06	0.17		4.43	8.66	0.25	0.22				0.02												1007149
Atlantic	Canary Islands	La Palma / Cumbre Vieja / Ad 1585 Eruption	Georoc 2020	[19993]	28.56	28.56	-19	-19	s_TLP 47-1	Phonolite		VOLCANIC ROCK	WR [19993]	55.79	1.08		20.26			0.93	3.7		3.67	1.05	0.17		4.52	8.57	0.26	0.25				0.01												1007150
Atlantic	Canary Islands	La Palma / Cumbre Vieja / Ad 1585 Eruption	Georoc 2020	[19993]	28.56	28.56	-19	-19	s_TLP 50-3	Phonolite		VOLCANIC ROCK	WR [19993]	55.98	1.06		20.23			0.91	3.65		3.63	1.03	0.17		4.46	8.63	0.25	0.17				0.04												1007151
Atlantic	Canary Islands	La Palma / Cumbre Vieja / Ad 1585 Eruption	Georoc 2020	[19993]	28.56	28.56	-19	-19	s_TLP 50-5	Phonolite		VOLCANIC ROCK	WR [19993]	55.94	1.05		20.32			0.9	3.61		3.53	1.01	0.17		4.53	8.69	0.24	0.24				0.02												1007152
Atlantic	Canary Islands	La Palma / Cumbre Vieja / Ad 1585 Eruption	Georoc 2020	[19993]	28.56	28.56	-19	-19	s_TLP 50-1	Phonolite		VOLCANIC ROCK	WR [19993]	55.89	1.07		20.58			0.92	3.67		3.99	0.92	0.17		4.2	8.35	0.24	0.23				0.02												1007153
Atlantic	Canary Islands	La Palma / Cumbre Vieja / Ad 1585 Eruption	Georoc 2020	[19993]	28.56	28.56	-19	-19	s_TLP 51-2	Phonolite		VOLCANIC ROCK	WR [19993]	55.99	1.05		20.64			0.91	3.62		3.83	0.84	0.17		4.25	8.44	0.24	0.26				0.01												1007154
Atlantic	Canary Islands	Gran Canaria / Mogan Formation	Georoc 2020	[4744]	27.5	28	-15.5	-15.8	s_T4	Basalt, Alkaline		VOLCANIC ROCK	WR [4744]	43.69	4.62		15.06					12.66	11.22	5.86	0.19		1.28	2.96	0.76																	103116
Atlantic	Canary Islands	Gran Canaria / Mogan Formation	Georoc 2020	[4744]	27.5	28	-15.5	-15.8	s_AII-MC	Not Given		VOLCANIC ROCK	WR [4744]	67.5	0.78		14.75					3.47	0.56	0.36	0.14		4.36	6.42	0.06																	103120
Atlantic	Canary Islands	Gran Canaria / Mogan Formation	Georoc 2020	[4744]	27.5	28	-15.5	-15.8	s_AIII-BTTS	Not Given		VOLCANIC ROCK	WR [4744]	67.83	0.75		15.35					3.12	0.34	0.28	0.11		4.12	7	0.07																	103121
Atlantic	Canary Islands	Gran Canaria / Mogan Formation	Georoc 2020	[4744]	27.5	28	-15.5	-15.8	s_AII-BTO	Not Given		VOLCANIC ROCK	WR [4744]	68.7	0.71		14.57					3.28	0.58	0.28	0.18		4.41	6.76	0.09																	103122
Atlantic	Canary Islands	Gran Canaria / Mogan Formation	Georoc 2020	[4744]	27.5	28	-15.5	-15.8	s_AIV-BTO	Not Given		VOLCANIC ROCK	WR [4744]	67.4	0.82		15.31					3.38	0.53	0.43	0.13		4.08	6.94	0.07																	103123
Atlantic	Canary Islands	Gran Canaria / Mogan Formation	Georoc 2020	[4744]	27.5	28	-15.5	-15.8	s_AIV-BTO-TS	Not Given		VOLCANIC ROCK	WR [4744]	67.35	0.71		14.89					3.01	0.48	0.47	0.13		4.17	7.26	0.1																	103124
Atlantic	Canary Islands	Gran Canaria / Mogan Formation	Georoc 2020	[4744]	27.5	28	-15.5	-15.8	s_AV-BTTS	Not Given		VOLCANIC ROCK	WR [4744]	67.52	0.8		15.66					3.14	0.64	0.33	0.13		3.66	7.15	0.12																	103125
Atlantic	Canary Islands	Gran Canaria / Mogan Formation	Georoc 2020	[4744]	27.5	28	-15.5	-15.8	s_AVA-BTO	Not Given		VOLCANIC ROCK	WR [4744]	67.17	0.85		15.19					3.45	0.5	0.56	0.17		4.02	6.82	0.09																	103126
Atlantic	Canary Islands	Gran Canaria / Mogan Formation	Georoc 2020	[4744]	27.5	28	-15.5	-15.8	s_AVIB-BTTS	Not Given		VOLCANIC ROCK	WR [4744]	67.55	0.77		15.61					3.11	0.37	0.34	0.12		4.17	6.96	0.05																	103127
Atlantic	Canary Islands	Gran Canaria / Mogan Formation	Georoc 2020	[4744]	27.5	28	-15.5	-15.8	s_AVI-BTO	Not Given		VOLCANIC ROCK	WR [4744]	67.16	0.74		15.09					3.06	0.72	0.5	0.14		4.03	7.11	0.07																	103128
Atlantic	Canary Islands	Gran Canaria / Mogan Formation	Georoc 2020	[4744]	27.5	28	-15.5	-15.8	s_AIII-F38	Trachyte		VOLCANIC ROCK	WR [4744]	65.89	0.84		16.02					3.02	1.11	0.47	0.12		3.15	7.67	0.16																	103129
Atlantic	Canary Islands	Gran Canaria / Mogan Formation	Georoc 2020	[4744]	27.5	28	-15.5	-15.8	s_AIII-F3-BTO	Trachyte		VOLCANIC ROCK	WR [4744]	66.1	0.76		15.57					2.92	0.84	0.45	0.12		3.7	7.67	0.14																	103130
Atlantic	Canary Islands	Gran Canaria / Mogan Formation	Georoc 2020	[4744]	27.5	28	-15.5	-15.8	s_AIII-F8-BTO	Trachyte		VOLCANIC ROCK	WR [4744]	67.59	0.73		15.35					2.88	0.68	0.41	0.14		3.79	7.41	0.1																	103131
Atlantic	Canary Islands	Gran Canaria / Mogan Formation	Georoc 2020	[4744]	27.5	28	-15.5	-15.8	s_AIV-F6-BTO	Trachyte		VOLCANIC ROCK	WR [4744]	66.98	0.79		16.02					2.92	0.85	0.45	0.13		3.37	7.63	0.15																	103132
Atlantic	Canary Islands	Gran Canaria / Mogan Formation	Georoc 2020	[4744]	27.5	28	-15.5	-15.8	s_AV-F32-BTO	Rhyolite		VOLCANIC ROCK	WR [4744]	68.65	0.59		13.52					3.01	0.25	0.11	0.15		4.34	7.39	0.04																	103133
Atlantic	Canary Islands	Gran Canaria / Mogan Formation	Georoc 2020	[4744]	27.5	28	-15.5	-15.8	s_AV-F27-BTO	Rhyolite		VOLCANIC ROCK	WR [4744]	69.71	0.6		13.8					3.1	0.27	0.14	0.17		4.54	6.72	0.05																	103134
Atlantic	Canary Islands	Gran Canaria / Mogan Formation	Georoc 2020	[4744]	27.5	28	-15.5	-15.8	s_AIII-F28-BTO	Rhyolite		VOLCANIC ROCK	WR [4744]	69.44	0.57		13.73					3.02	0.28	0.15	0.18		4.69	6.45	0.05																	103135
Atlantic	Canary Islands	Gran Canaria / Mogan Formation	Georoc 2020	[4744]	27.5	28	-15.5	-15.8	s_AIII-F12-BTO	Rhyolite		VOLCANIC ROCK	WR [4744]	69.39	0.58		14.3					2.92	0.3	0.29	0.19		4.65	6.49	0.05																	103136
Atlantic	Canary Islands	Gran Canaria / Mogan Formation	Georoc 2020	[4744]	27.5	28	-15.5	-15.8	s_AII-F9-MCA	Rhyolite		VOLCANIC ROCK	WR [4744]	69.96	0.62		13.8					3.27	0.21	0.13	0.17		4.71	6.34	0.04																	103137
Atlantic	Canary Islands	Gran Canaria / Mogan Formation	Georoc 2020	[4744]	27.5	28	-15.5	-15.8	s_AIV-F2-BTTS	Rhyolite		VOLCANIC ROCK	WR [4744]	70.51	0.56		13.27					3.25	0.24	0.09	0.16		4.81	6.26	0.04																	103138
Atlantic	Canary Islands	Gran Canaria / Mogan Formation	Georoc 2020	[4744]	27.5	28	-15.5	-15.8	s_AIII-F11-BTO	Rhyolite		VOLCANIC ROCK	WR [4744]	70.63	0.56		13.25					3.27	0.25	0.19	0.16		4.83	6.29	0.04																	103139
Atlantic	Canary Islands	Gran Canaria / Mogan Formation	Georoc 2020	[4744]	27.5	28	-15.5	-15.8	s_A-F40-BTO	Rhyolite		VOLCANIC ROCK	WR [4744]	70.7	0.56		13.27					3.23	0.25	0.19	0.16		4.83	6.26	0.04																	103140
Atlantic	Canary Islands	Gran Canaria / Mogan Formation	Georoc 2020	[4744]	27.5	28	-15.5	-15.8	s_A-F20-BTAU	Rhyolite		VOLCANIC ROCK	WR [4744]	70.67	0.56		13.27					3.25	0.24	0.18	0.16		4.83	6.27	0.04																	103141
Atlantic	Canary Islands	La Palma / Cumbre Vieja	Georoc 2020	[1211]	28.5	28.5	-18	-18	s_LP26192-5	Basanite		VOLCANIC ROCK	WR [1211]											12.1																						10360
Atlantic	Canary Islands	La Palma / Cumbre Vieja	Georoc 2020	[1211]	28.5	28.5	-18	-18	s_LP26192-5	Basanite		VOLCANIC ROCK	WR [1211]											12																						10361
Atlantic	Canary Islands	La Gomera	Georoc 2020	[1211]	28.1	28.1	-17.2	-17.2	s_EG15B	Basanite		VOLCANIC ROCK	WR [1211]											14.8																						10371
Atlantic	Canary Islands	La Palma / Taburiente / Barranco Fagundo Series	Georoc 2020	[4809]	28.6	28.6	-17.9	-17.9	s_LPF96-41	Basalt, Alkaline		VOLCANIC ROCK	WR [4809]	45.4	3.31		12.1					12.13	10.45	11.68	0.18		1.12	2.61	0.49																	104014
Atlantic	Canary Islands	La Palma / Taburiente / Barranco Fagundo Series	Georoc 2020	[4809]	28.6	28.6	-17.9	-17.9	s_LPF96-46	Basalt, Alkaline		VOLCANIC ROCK	WR [4809]	44.8	3.07		11.9					12.41	11.06	11.4	0.18		0.85	2.59	0.51																	104015
Atlantic	Canary Islands	La Palma / Taburiente / Barranco Fagundo Series	Georoc 2020	[4809]	28.6	28.6	-17.9	-17.9	s_LPF96-48	Basalt, Alkaline		VOLCANIC ROCK	WR [4809]	44.1	3.82		12.7					12.42	11.1	9.48	0.19		0.79	3.32	0.68																	104016
Atlantic	Canary Islands	La Palma / Taburiente / Barranco Fagundo Series	Georoc 2020	[4809]	28.6	28.6	-17.9	-17.9	s_LPF96-63	Basalt, Alkaline		VOLCANIC ROCK	WR [4809]	45	3.56		11.4					11.77	10.7	11.81	0.17		1.41	2.68	0.45																	104017
Atlantic	Canary Islands	La Palma / Taburiente / Barranco Izcaqua Series	Georoc 2020	[4809]	28.6	28.6	-17.9	-17.9	s_LP96-22	Basalt, Alkaline		VOLCANIC ROCK	WR [4809]	43	3.32		11.2					13.17	12.76	11.58	0.19		0.49	2.54	0.39																	104019
Atlantic	Canary Islands	La Palma / Taburiente / Barranco Izcaqua Series	Georoc 2020	[4809]	28.6	28.6	-17.9	-17.9	s_LP96-60	Basalt, Alkaline		VOLCANIC ROCK	WR [4809]	43.5	3.48		13.1					13	10.88	9.72	0.2		1.29	3.15	0.65																	104020
Atlantic	Canary Islands	La Palma / Taburiente / Barranco Izcaqua Series	Georoc 2020	[4809]	28.6	28.6	-17.9	-17.9	s_LP96-83	Basalt, Alkaline		VOLCANIC ROCK	WR [4809]	42.7	3.36		11.3					13.29	12.37	11.31	0.19		0.65	2.66	0.4																	104021
Atlantic	Canary Islands	Lanzarote	Georoc 2020	[4845]	29	29	-13.6	-13.6	s_LA6-BAS	Basalt, Alkaline		VOLCANIC ROCK	WR [4845]	43.76	3.09		12.52					11.63	10.85	11.9	0.18		1.2	2.62	0.73																	104378
Atlantic	Canary Islands	Lanzarote	Georoc 2020	[4845]	29	29	-13.6	-13.6	s_LA8-BAS	Basalt, Alkaline		VOLCANIC ROCK	WR [4845]	44.05	2.67		11.33					11.09	10.47	14.41	0.18		1.23	2.91	0.96																	104379
Atlantic	Canary Islands	Lanzarote	Georoc 2020	[4845]	29	29	-13.6	-13.6	s_LA11-BAS	Basalt, Alkaline		VOLCANIC ROCK	WR [4845]	42.51	2.81		10.73					11.66	9.49	16.41	0.19		1.5	3.01	1.04																	104380
Atlantic	Canary Islands	Tenerife	Georoc 2020	[4843]	28.3	28.3	-16.6	-16.6	s_AD1	Basalt, Alkaline		VOLCANIC ROCK	WR [4843]	43.48	3.24		12.3					12.61	10.58	11.84	0.189		0.978	2.27	0.495																0.62	104596
Atlantic	Canary Islands	Tenerife	Georoc 2020	[4843]	28.3	28.3	-16.6	-16.6	s_AD2	Basalt, Alkaline		VOLCANIC ROCK	WR [4843]	46.06	3.12		14.47					11.37	11.06	7.46	0.188		0.945	2.93	0.578																-0.12	104597
Atlantic	Canary Islands	Tenerife	Georoc 2020	[4843]	28.3	28.3	-16.6	-16.6	s_AD3	Basalt, Alkaline		VOLCANIC ROCK	WR [4843]	44.16	3.85		15.05					12.6	12.3	5.92	0.187		0.988	2.35	0.542																0.2	104598
Atlantic	Canary Islands	Tenerife	Georoc 2020	[4843]	28.3	28.3	-16.6	-16.6	s_AD4	Basalt, Alkaline		VOLCANIC ROCK	WR [4843]	46.09	3.12		14.45					11.36	11.07	7.1	0.184		0.95	2.98	0.58																0.25	104599
Atlantic	Canary Islands	Tenerife	Georoc 2020	[4843]	28.3	28.3	-16.6	-16.6	s_AD5	Ankaramite		VOLCANIC ROCK	WR [4843]	44.83	3.31		12.81					11.78	11.77	9.47	0.183		0.888	2.44	0.514																0.1	104600
Atlantic	Canary Islands	Tenerife	Georoc 2020	[4843]	28.3	28.3	-16.6	-16.6	s_AD6	Basalt, Alkaline		VOLCANIC ROCK	WR [4843]	46.33	3.17		14.7					11.22	10.82	7.19	0.19		1.007	3.02	0.504																0.12	104601
Atlantic	Canary Islands	Tenerife	Georoc 2020	[4843]	28.3	28.3	-16.6	-16.6	s_AD7	Basalt, Alkaline		VOLCANIC ROCK	WR [4843]	44.66	3.46		13.55					11.87	12.27	8.21	0.19		0.976	2.65	0.533																0.32	104602
Atlantic	Canary Islands	Tenerife	Georoc 2020	[4843]	28.3	28.3	-16.6	-16.6	s_AD8	Basalt, Alkaline		VOLCANIC ROCK	WR [4843]	46.26	3.06		14.27					11.35	11.35	7.27	0.169		0.861	2.88	0.547																0.26	104603
Atlantic	Canary Islands	Tenerife	Georoc 2020	[4843]	28.3	28.3	-16.6	-16.6	s_AD9	Basalt, Alkaline		VOLCANIC ROCK	WR [4843]	45.58	3.49		14.17					11.68	11.99	7.04	0.173		0.848	2.7	0.519																-0.05	104604
Atlantic	Canary Islands	Tenerife	Georoc 2020	[4843]	28.3	28.3	-16.6	-16.6	s_AD10	Basalt, Alkaline		VOLCANIC ROCK	WR [4843]	45.16	3.4		14.05					11.31	11.39	7.98	0.183		1.116	2.83	0.592																0.13	104605
Atlantic	Canary Islands	Tenerife	Georoc 2020	[4843]	28.3	28.3	-16.6	-16.6	s_AD11	Ankaramite		VOLCANIC ROCK	WR [4843]	43.71	3.25		11.15					11.86	13.23	11.28	0.182		0.828	2.31	0.469																-0.14	104606
Atlantic	Canary Islands	Tenerife	Georoc 2020	[4843]	28.3	28.3	-16.6	-16.6	s_AD12	Ankaramite		VOLCANIC ROCK	WR [4843]	43.66	3.43		12.14					12.46	12.94	10.32	0.186		0.957	1.84	0.367																0.51	104607
Atlantic	Canary Islands	Tenerife	Georoc 2020	[4843]	28.3	28.3	-16.6	-16.6	s_AD13	Mugearite		VOLCANIC ROCK	WR [4843]	50.96	2.45		17.99					8.13	6.87	3.4	0.229		2.32	5.09	0.95																1.29	104608
Atlantic	Canary Islands	Tenerife	Georoc 2020	[4843]	28.3	28.3	-16.6	-16.6	s_AD14	Mugearite		VOLCANIC ROCK	WR [4843]	51.45	2.46		18.07					8.17	6.93	3.44	0.232		2.369	5	0.949																1.29	104609
Atlantic	Canary Islands	Tenerife	Georoc 2020	[4843]	28.3	28.3	-16.6	-16.6	s_AD15	Mugearite		VOLCANIC ROCK	WR [4843]	50.5	2.48		18.54					7.76	6.94	3.42	0.214		2.524	5.41	0.855																1.23	104610
Atlantic	Canary Islands	Tenerife	Georoc 2020	[4843]	28.3	28.3	-16.6	-16.6	s_AD16	Hawaiite		VOLCANIC ROCK	WR [4843]	49.34	2.78		17.77					9.27	8.62	3.51	0.221		1.802	4.44	1.054																0.19	104611
Atlantic	Canary Islands	Tenerife	Georoc 2020	[4843]	28.3	28.3	-16.6	-16.6	s_AD17	Hawaiite		VOLCANIC ROCK	WR [4843]	49.94	2.69		17.9					9.11	8.37	3.29	0.219		1.845	4.2	1.025																0.56	104612
Atlantic	Canary Islands	Tenerife	Georoc 2020	[4843]	28.3	28.3	-16.6	-16.6	s_AD18	Mugearite		VOLCANIC ROCK	WR [4843]	53.26	2.12		18.39					7.35	6.6	2.58	0.222		2.298	5.33	0.637																0.43	104613
Atlantic	Canary Islands	Tenerife	Georoc 2020	[4843]	28.3	28.3	-16.6	-16.6	s_AD19	Hawaiite		VOLCANIC ROCK	WR [4843]	49.22	3.01		17.38					9.2	8.17	4.09	0.21		1.893	4.43	0.862																0.3	104614
Atlantic	Canary Islands	Tenerife	Georoc 2020	[4843]	28.3	28.3	-16.6	-16.6	s_AD20	Hawaiite		VOLCANIC ROCK	WR [4843]	47.46	3.7		16.86					10.23	9.33	4.41	0.21		1.629	3.85	0.679																0.44	104615
Atlantic	Canary Islands	Tenerife	Georoc 2020	[4843]	28.3	28.3	-16.6	-16.6	s_AD21	Hawaiite		VOLCANIC ROCK	WR [4843]	47.46	3.48		16.97					10.31	9.28	4.75	0.21		1.537	4.04	0.747																-0.22	104616
Atlantic	Canary Islands	Tenerife	Georoc 2020	[4843]	28.3	28.3	-16.6	-16.6	s_AD22	Hawaiite		VOLCANIC ROCK	WR [4843]	48.77	3.19		17.06					9.25	8.46	4.18	0.228		1.925	4.49	0.991																0.35	104617
Atlantic	Canary Islands	Tenerife	Georoc 2020	[4843]	28.3	28.3	-16.6	-16.6	s_AD23	Hawaiite		VOLCANIC ROCK	WR [4843]	48.38	3.3		17.13					9.52	8.56	4.25	0.222		1.824	4.49	0.956																0.68	104618
Atlantic	Canary Islands	Tenerife	Georoc 2020	[4843]	28.3	28.3	-16.6	-16.6	s_AD24	Ankaramite		VOLCANIC ROCK	WR [4843]	43.88	4.01		14.9					12.53	11.88	6.96	0.199		1.117	2.43	0.487																0.31	104619
Atlantic	Canary Islands	Tenerife	Georoc 2020	[4843]	28.3	28.3	-16.6	-16.6	s_AD25	Hawaiite		VOLCANIC ROCK	WR [4843]	49.34	2.9		17.58					8.83	8.11	4.03	0.235		1.976	4.62	1.068																0.99	104620
Atlantic	Canary Islands	Tenerife	Georoc 2020	[4843]	28.3	28.3	-16.6	-16.6	s_AD26	Hawaiite		VOLCANIC ROCK	WR [4843]	48.17	3.31		17.95					10.42	8.94	3.26	0.212		1.34	4.09	0.892																0.55	104621
Atlantic	Canary Islands	Tenerife	Georoc 2020	[4843]	28.3	28.3	-16.6	-16.6	s_AD27	Trachyphonolite		VOLCANIC ROCK	WR [4843]	59	0.46		22					2.71	2.17	0.85	0.18		6.328	6.1	0.073																4.4	104622
Atlantic	Canary Islands	Tenerife	Georoc 2020	[4843]	28.3	28.3	-16.6	-16.6	s_AD28	Benmoreite		VOLCANIC ROCK	WR [4843]	56.78	1.28		19.94					4.92	4.9	1.29	0.224		3.445	6.53	0.215																1.49	104623
Atlantic	Canary Islands	Tenerife	Georoc 2020	[4843]	28.5	28.5	-16.3	-16.3	s_AN12	Basalt, Alkaline		VOLCANIC ROCK	WR [4843]	42.23	3.77		12.55					12.73	11.89	10.54	0.19		0.564	2.73	0.601																0.89	104624
Atlantic	Canary Islands	Tenerife	Georoc 2020	[4843]	28.5	28.5	-16.3	-16.3	s_AN13	Ankaramite		VOLCANIC ROCK	WR [4843]	42.43	3.63		9.52					13.18	14.6	12.38	0.19		0.354	1.54	0.237																0.33	104625
Atlantic	Canary Islands	Tenerife	Georoc 2020	[4843]	28.5	28.5	-16.3	-16.3	s_AN14	Basalt, Alkaline		VOLCANIC ROCK	WR [4843]	43.83	3.78		11.96					12.87	13.53	8.54	0.171		0.687	1.78	0.58																1.63	104626
Atlantic	Canary Islands	Tenerife	Georoc 2020	[4843]	28.5	28.5	-16.3	-16.3	s_AN15	Basalt, Alkaline		VOLCANIC ROCK	WR [4843]	44.55	3.68		12.42					12.37	12.38	8.42	0.174		0.551	2.88	0.552																1.46	104627
Atlantic	Canary Islands	Tenerife	Georoc 2020	[4843]	28.5	28.5	-16.3	-16.3	s_AN16	Basalt, Alkaline		VOLCANIC ROCK	WR [4843]	45.82	3.41		14.07					12.04	11.33	7.41	0.178		0.852	2.7	0.597																1.14	104628
Atlantic	Canary Islands	Tenerife	Georoc 2020	[4843]	28.5	28.5	-16.3	-16.3	s_AN17	Basalt, Alkaline		VOLCANIC ROCK	WR [4843]	43.87	4.3		13.69					12.63	12.52	6.34	0.191		0.646	3.32	0.557																1.13	104629
Atlantic	Canary Islands	Tenerife	Georoc 2020	[4843]	28.5	28.5	-16.3	-16.3	s_AN18	Basalt, Alkaline		VOLCANIC ROCK	WR [4843]	44.39	3.71		12.34					12.3	12.01	9.22	0.167		0.625	2.68	0.531																1.2	104630
Atlantic	Canary Islands	Tenerife	Georoc 2020	[4843]	28.5	28.5	-16.3	-16.3	s_AN19	Basalt, Alkaline		VOLCANIC ROCK	WR [4843]	45.13	3.46		12.54					12.33	12.42	7.8	0.266		0.519	2.86	0.638																1.38	104631
Atlantic	Canary Islands	Tenerife	Georoc 2020	[4843]	28.5	28.5	-16.3	-16.3	s_AN20	Basalt, Alkaline		VOLCANIC ROCK	WR [4843]	47.1	3.84		16.07					11.18	9.79	4.23	0.16		2.112	2.8	0.845																1.55	104632
Atlantic	Canary Islands	Tenerife	Georoc 2020	[4843]	28.5	28.5	-16.3	-16.3	s_AN41	Ankaramite		VOLCANIC ROCK	WR [4843]	44.2	3.43		10.68					12.16	12.68	11.32	0.182		0.72	2.06	0.499																1.6	104633
Atlantic	Canary Islands	Tenerife	Georoc 2020	[4843]	28.5	28.5	-16.3	-16.3	s_AN42	Ankaramite		VOLCANIC ROCK	WR [4843]	43.79	3.18		11.27					12.22	12.24	12.62	0.177		0.477	2.42	0.429																0.13	104634
Atlantic	Canary Islands	Tenerife	Georoc 2020	[4843]	28.5	28.5	-16.3	-16.3	s_AN49	Basanite		VOLCANIC ROCK	WR [4843]	43.08	4.5		14.47					13.06	11.38	5.85	0.24		1.038	3.24	1.04																1.78	104635
Atlantic	Canary Islands	Tenerife	Georoc 2020	[4843]	28.5	28.5	-16.3	-16.3	s_AN50	Basanite		VOLCANIC ROCK	WR [4843]	42.79	4.79		15.18					13.07	11.16	6.1	0.194		0.769	3.21	0.826																1.41	104636
Atlantic	Canary Islands	Tenerife	Georoc 2020	[4843]	28.5	28.5	-16.3	-16.3	s_AN51	Basanite		VOLCANIC ROCK	WR [4843]	42.56	4.73		14.9					13.07	11.7	6.65	0.199		0.936	3.24	0.796																1.43	104637
Atlantic	Canary Islands	Tenerife	Georoc 2020	[4843]	28.5	28.5	-16.3	-16.3	s_AN52	Basanite		VOLCANIC ROCK	WR [4843]	43.16	4.61		16.09					12.44	11.43	5.65	0.221		0.797	2.57	1.016																3.13	104638
Atlantic	Canary Islands	Tenerife	Georoc 2020	[4843]	28.5	28.5	-16.3	-16.3	s_AN1	Basanite		VOLCANIC ROCK	WR [4843]	41.57	5.09		14.8					14.25	11.42	6.16	0.222		0.68	2.29	0.77																2.19	104639
Atlantic	Canary Islands	Tenerife	Georoc 2020	[4843]	28.5	28.5	-16.3	-16.3	s_AN21	Basanite		VOLCANIC ROCK	WR [4843]	41.96	4.84		14.5					13.89	11.57	6	0.229		0.725	3.12	1.065																1.3	104640
Atlantic	Canary Islands	Tenerife	Georoc 2020	[4843]	28.5	28.5	-16.3	-16.3	s_AN22	Basanite		VOLCANIC ROCK	WR [4843]	41.64	4.56		12.82					13.79	12.38	8.21	0.189		0.572	2.93	0.55																1.47	104641
Atlantic	Canary Islands	Tenerife	Georoc 2020	[4843]	28.5	28.5	-16.3	-16.3	s_AN23	Basanite		VOLCANIC ROCK	WR [4843]	42.57	4.62		15.23					13.34	11.86	6.64	0.19		0.788	2.46	0.613																1.38	104642
Atlantic	Canary Islands	Tenerife	Georoc 2020	[4843]	28.5	28.5	-16.3	-16.3	s_AN24	Basanite		VOLCANIC ROCK	WR [4843]	43.02	4.21		14.6					13.03	10.98	5.56	0.229		0.939	3.93	1.203																1.7	104643
Atlantic	Canary Islands	Tenerife	Georoc 2020	[4843]	28.5	28.5	-16.3	-16.3	s_AN25	Ankaramite		VOLCANIC ROCK	WR [4843]	42.84	4.3		13.54					13.15	11.09	8.12	0.177		0.762	3.46	0.525																0.96	104644
Atlantic	Canary Islands	Tenerife	Georoc 2020	[4843]	28.5	28.5	-16.3	-16.3	s_AN26	Basanite		VOLCANIC ROCK	WR [4843]	42.34	4.61		13.58					12.82	11.74	8.24	0.179		0.671	3.26	0.578																1	104645
Atlantic	Canary Islands	Tenerife	Georoc 2020	[4843]	28.5	28.5	-16.3	-16.3	s_AN27	Basanite		VOLCANIC ROCK	WR [4843]	44.78	4.02		14.62					11.72	10.27	7.04	0.181		0.922	3.84	0.58																1.73	104646
Atlantic	Canary Islands	Tenerife	Georoc 2020	[4843]	28.5	28.5	-16.3	-16.3	s_AN28	Basanite		VOLCANIC ROCK	WR [4843]	41.79	4.59		13.76					13.36	11.98	7.9	0.178		0.996	3.08	0.528																0.58	104647
Atlantic	Canary Islands	Tenerife	Georoc 2020	[4843]	28.5	28.5	-16.3	-16.3	s_AN29	Basanite		VOLCANIC ROCK	WR [4843]	41.83	4.15		13.39					13.01	11.63	8.13	0.184		0.709	3.92	0.739																0.94	104648
Atlantic	Canary Islands	Tenerife	Georoc 2020	[4843]	28.5	28.5	-16.3	-16.3	s_AN37	Tephrite		VOLCANIC ROCK	WR [4843]	42.8	4.85		14.72					12.83	11.04	5.64	0.208		1.159	4.03	0.803																0.65	104649
Atlantic	Canary Islands	Tenerife	Georoc 2020	[4843]	28.5	28.5	-16.3	-16.3	s_AN38	Basanite		VOLCANIC ROCK	WR [4843]	41.86	3.98		12.86					12.78	11.77	9.55	0.183		1.64	2.83	0.644																1.15	104650
Atlantic	Canary Islands	Tenerife	Georoc 2020	[4843]	28.5	28.5	-16.3	-16.3	s_AN39	Basanite		VOLCANIC ROCK	WR [4843]	42.41	4.88		14.44					13.54	11.2	6.63	0.194		0.799	2.83	0.863																1.02	104651
Atlantic	Canary Islands	Tenerife	Georoc 2020	[4843]	28.5	28.5	-16.3	-16.3	s_AN40	Hawaiite		VOLCANIC ROCK	WR [4843]	49.95	2.68		17.9					9.1	8.61	2.84	0.266		2.666	3.72	0.867																1.87	104652
Atlantic	Canary Islands	Tenerife	Georoc 2020	[4843]	28.5	28.5	-16.3	-16.3	s_AN43	Basanite		VOLCANIC ROCK	WR [4843]	42.04	4.67		13.38					13.6	12.12	7.22	0.193		0.609	3.36	0.673																0.76	104653
Atlantic	Canary Islands	Tenerife	Georoc 2020	[4843]	28.5	28.5	-16.3	-16.3	s_AN44	Ankaramite		VOLCANIC ROCK	WR [4843]	41.62	4.67		12.62					13.86	12.42	8.28	0.189		0.726	2.82	0.589																0.45	104654
Atlantic	Canary Islands	Tenerife	Georoc 2020	[4843]	28.5	28.5	-16.3	-16.3	s_AN45	Basanite		VOLCANIC ROCK	WR [4843]	42.19	4.58		14.37					12.95	12.25	6.45	0.19		0.728	3.57	0.678																0.25	104655
Atlantic	Canary Islands	Tenerife	Georoc 2020	[4843]	28.5	28.5	-16.3	-16.3	s_AN46	Basanite		VOLCANIC ROCK	WR [4843]	42.66	4.56		14.46					12.98	12.25	6.39	0.188		0.684	3.26	0.688																0.86	104656
Atlantic	Canary Islands	Tenerife	Georoc 2020	[4843]	28.5	28.5	-16.3	-16.3	s_AN47	Basanite		VOLCANIC ROCK	WR [4843]	42.48	4.53		14.4					12.81	12.15	6.47	0.187		0.582	3.68	0.689																0.76	104657
Atlantic	Canary Islands	Tenerife	Georoc 2020	[4843]	28.5	28.5	-16.3	-16.3	s_AN48	Basanite		VOLCANIC ROCK	WR [4843]	41.8	4.87		14.71					13.25	11.55	6.07	0.204		0.739	4.01	0.803																0.49	104658
Atlantic	Canary Islands	Tenerife	Georoc 2020	[4843]	28.5	28.5	-16.3	-16.3	s_AN30	Basanite		VOLCANIC ROCK	WR [4843]	43.03	4.47		14.29					12.71	12	6.33	0.199		1.174	2.92	0.761																1.98	104659
Atlantic	Canary Islands	Tenerife	Georoc 2020	[4843]	28.5	28.5	-16.3	-16.3	s_AN31	Basanite		VOLCANIC ROCK	WR [4843]	42.83	4.08		13.99					12.86	11.71	6.9	0.22		1.006	3.4	1.049																1.02	104660
Atlantic	Canary Islands	Tenerife	Georoc 2020	[4843]	28.5	28.5	-16.3	-16.3	s_AN32	Basanite		VOLCANIC ROCK	WR [4843]	43.95	3.75		14.24					12.26	10.42	5.21	0.238		1.514	3.92	1.894																1.38	104661
Atlantic	Canary Islands	Tenerife	Georoc 2020	[4843]	28.5	28.5	-16.3	-16.3	s_AN33	Benmoreite		VOLCANIC ROCK	WR [4843]	59.38	1.06		19.69					3.96	3.12	0.93	0.216		3.738	6.82	0.197																1.24	104662
Atlantic	Canary Islands	Tenerife	Georoc 2020	[4843]	28.5	28.5	-16.3	-16.3	s_AN34	Benmoreite		VOLCANIC ROCK	WR [4843]	59.75	1.05		20.2					3.97	3.3	1.02	0.222		3.643	5.95	0.197																1.83	104663
Atlantic	Canary Islands	Tenerife	Georoc 2020	[4843]	28.5	28.5	-16.3	-16.3	s_AN35	Benmoreite		VOLCANIC ROCK	WR [4843]	58.86	1.17		19.49					4.2	3.45	1.07	0.209		3.673	6.79	0.244																1.23	104664
Atlantic	Canary Islands	Tenerife	Georoc 2020	[4843]	28.5	28.5	-16.3	-16.3	s_AN36	Benmoreite		VOLCANIC ROCK	WR [4843]	59.13	1.19		19.78					4.28	3.58	1.11	0.198		3.649	5.86	0.23																1.55	104665
Atlantic	Canary Islands	Tenerife	Georoc 2020	[4843]	28.3	28.3	-16.83	-16.83	s_TE37	Basalt, Alkaline		VOLCANIC ROCK	WR [4843]	45.11	3.58		14.49					11.65	10.92	8.59	0.184		1.077	2.31	0.5																1.09	104666
Atlantic	Canary Islands	Tenerife	Georoc 2020	[4843]	28.3	28.3	-16.83	-16.83	s_TE38	Basalt, Alkaline		VOLCANIC ROCK	WR [4843]	44.95	3.56		14.28					11.68	11.43	8.36	0.182		1.018	2.43	0.482																0.84	104667
Atlantic	Canary Islands	Tenerife	Georoc 2020	[4843]	28.3	28.3	-16.83	-16.83	s_TE39	Basalt, Alkaline		VOLCANIC ROCK	WR [4843]	45.02	3.57		14.44					11.67	11.29	8.34	0.181		1.058	2.43	0.475																0.76	104668
Atlantic	Canary Islands	Tenerife	Georoc 2020	[4843]	28.3	28.3	-16.83	-16.83	s_TE40	Basalt, Alkaline		VOLCANIC ROCK	WR [4843]	45.26	3.56		14.17					11.67	10.97	9.25	0.182		0.523	2.68	0.472																1.21	104669
Atlantic	Canary Islands	Tenerife	Georoc 2020	[4843]	28.3	28.3	-16.83	-16.83	s_TE1	Basalt, Alkaline		VOLCANIC ROCK	WR [4843]	44.4	4.16		15.73					12.22	11.28	5.68	0.177		1.019	2.76	0.635																1.1	104670
Atlantic	Canary Islands	Tenerife	Georoc 2020	[4843]	28.3	28.3	-16.83	-16.83	s_TE2	Ankaramite		VOLCANIC ROCK	WR [4843]	46.19	3.73		12.71					11.59	11.92	8.21	0.159		0.896	2.01	0.458																1.52	104671
Atlantic	Canary Islands	Tenerife	Georoc 2020	[4843]	28.3	28.3	-16.83	-16.83	s_TE3	Basalt, Alkaline		VOLCANIC ROCK	WR [4843]	45.03	4.01		13.98					12.85	11.25	6.82	0.158		1.036	2.21	0.554																2.49	104672
Atlantic	Canary Islands	Tenerife	Georoc 2020	[4843]	28.3	28.3	-16.83	-16.83	s_TE4	Basalt, Alkaline		VOLCANIC ROCK	WR [4843]	44.19	4.05		15.22					12.47	10.97	6.31	0.186		1.132	2.72	0.591																1	104673
Atlantic	Canary Islands	Tenerife	Georoc 2020	[4843]	28.3	28.3	-16.83	-16.83	s_TE5	Basalt, Alkaline		VOLCANIC ROCK	WR [4843]	44.48	3.96		14.96					13.23	11.03	5.46	0.207		1.185	2.66	0.575																0.84	104674
Atlantic	Canary Islands	Tenerife	Georoc 2020	[4843]	28.3	28.3	-16.83	-16.83	s_TE6	Basalt, Alkaline		VOLCANIC ROCK	WR [4843]	44.57	3.8		15.03					12.95	11.27	5.85	0.198		1.11	2.83	0.593																0.61	104675
Atlantic	Canary Islands	Tenerife	Georoc 2020	[4843]	28.3	28.3	-16.83	-16.83	s_TE7	Ankaramite		VOLCANIC ROCK	WR [4843]	45.1	3.37		15.26					11.77	10.55	6.9	0.189		1.329	3.22	0.602																1.1	104676
Atlantic	Canary Islands	Tenerife	Georoc 2020	[4843]	28.3	28.3	-16.83	-16.83	s_TE8	Ankaramite		VOLCANIC ROCK	WR [4843]	43.59	3.33		13.81					12.53	11.58	9.28	0.173		0.998	2.4	0.459																0.99	104677
Atlantic	Canary Islands	Tenerife	Georoc 2020	[4843]	28.3	28.3	-16.83	-16.83	s_TE9	Ankaramite		VOLCANIC ROCK	WR [4843]	43.61	2.21		9.54					12.42	11.12	16.89	0.176		0.568	1.23	0.284																0.64	104678
Atlantic	Canary Islands	Tenerife	Georoc 2020	[4843]	28.3	28.3	-16.83	-16.83	s_TE10	Tephrite		VOLCANIC ROCK	WR [4843]	45.96	3.48		17.29					10.52	10.03	4.2	0.187		1.685	3.82	0.893																0.9	104679
Atlantic	Canary Islands	Tenerife	Georoc 2020	[4843]	28.3	28.3	-16.83	-16.83	s_TE11	Tephrite		VOLCANIC ROCK	WR [4843]	44.23	4		15.75					11.5	11.13	5.47	0.179		1.399	3.79	0.724																0.53	104680
Atlantic	Canary Islands	Tenerife	Georoc 2020	[4843]	28.3	28.3	-16.83	-16.83	s_TE12	Tephrite		VOLCANIC ROCK	WR [4843]	44.54	3.65		16.53					11.21	10.44	5.13	0.179		1.63	4.19	0.801																1.29	104681
Atlantic	Canary Islands	Tenerife	Georoc 2020	[4843]	28.3	28.3	-16.83	-16.83	s_TE13	Ankaramite		VOLCANIC ROCK	WR [4843]	42.11	3.22		10.43					13.27	12.07	13.3	0.167		0.784	2.03	0.39																1.1	104682
Atlantic	Canary Islands	Tenerife	Georoc 2020	[4843]	28.3	28.3	-16.83	-16.83	s_TE23	Basalt, Alkaline		VOLCANIC ROCK	WR [4843]	43.92	3.37		13.67					12.76	11.01	9.61	0.193		1.006	2.75	0.449																0.34	104683
Atlantic	Canary Islands	Tenerife	Georoc 2020	[4843]	28.3	28.3	-16.83	-16.83	s_TE51	Basalt, Alkaline		VOLCANIC ROCK	WR [4843]	43.71	3.3		12.8					11.85	13.22	9.11	0.187		0.885	2.56	0.555																0.56	104684
Atlantic	Canary Islands	Tenerife	Georoc 2020	[4843]	28.3	28.3	-16.83	-16.83	s_TE52	Basalt, Alkaline		VOLCANIC ROCK	WR [4843]	44.98	3.78		16.09					11.96	10.41	5.4	0.189		1.327	3.13	0.662																0.65	104685
Atlantic	Canary Islands	Tenerife	Georoc 2020	[4843]	28.3	28.3	-16.83	-16.83	s_TE53	Mugearite		VOLCANIC ROCK	WR [4843]	51.08	2.59		16.62					9.65	7.26	3.57	0.222		1.828	4.86	0.999																0.03	104686
Atlantic	Canary Islands	Tenerife	Georoc 2020	[4843]	28.3	28.3	-16.83	-16.83	s_TE54	Basalt, Alkaline		VOLCANIC ROCK	WR [4843]	43.33	3.4		12.34					12.95	11.59	9.83	0.183		1.086	2.87	0.579																0.52	104688
Atlantic	Canary Islands	Tenerife	Georoc 2020	[4843]	28.3	28.3	-16.83	-16.83	s_TE60	Basanite		VOLCANIC ROCK	WR [4843]	41.6	4		13.11					13.72	11.52	8.51	0.218		1.054	2.94	0.974																0.31	104689
Atlantic	Canary Islands	Tenerife	Georoc 2020	[4843]	28.3	28.3	-16.83	-16.83	s_TE61	Basalt, Alkaline		VOLCANIC ROCK	WR [4843]	46.36	2.2		13.91					11.77	9.83	10.68	0.16		0.549	2.91	0.294																-0.4	104690
Atlantic	Canary Islands	Tenerife	Georoc 2020	[4843]	28.3	28.3	-16.83	-16.83	s_TE62	Basanite		VOLCANIC ROCK	WR [4843]	44.67	3.99		16.71					11.25	9.79	5.16	0.193		1.532	4.05	0.749																0.34	104691
Atlantic	Canary Islands	Tenerife	Georoc 2020	[4843]	28.3	28.3	-16.83	-16.83	s_TE63	Basanite		VOLCANIC ROCK	WR [4843]	43.03	4.02		15.14					12.54	10.79	5.77	0.221		1.356	3.84	1.481																1.2	104692
Atlantic	Canary Islands	Tenerife	Georoc 2020	[4843]	28.3	28.3	-16.83	-16.83	s_TE64	Basanite		VOLCANIC ROCK	WR [4843]	42.8	4.39		15.32					12.95	11.05	5.85	0.202		1.558	2.85	1.142																0.7	104693
Atlantic	Canary Islands	Tenerife	Georoc 2020	[4843]	28.3	28.3	-16.83	-16.83	s_TE24	Basalt, Alkaline		VOLCANIC ROCK	WR [4843]	44.38	3.6		15.02					11.73	12.03	6.69	0.181		1.242	2.86	0.614																0.72	104694
Atlantic	Canary Islands	Tenerife	Georoc 2020	[4843]	28.3	28.3	-16.83	-16.83	s_TE25	Ankaramite		VOLCANIC ROCK	WR [4843]	44.45	2.73		11.32					11.65	11.79	14.06	0.178		0.707	1.2	0.325																1.74	104695
Atlantic	Canary Islands	Tenerife	Georoc 2020	[4843]	28.3	28.3	-16.83	-16.83	s_TE26	Ankaramite		VOLCANIC ROCK	WR [4843]	45.71	2.89		13.35					11.52	10	10.06	0.177		1.102	3	0.549																-0.17	104696
Atlantic	Canary Islands	Tenerife	Georoc 2020	[4843]	28.3	28.3	-16.83	-16.83	s_TE27	Basalt, Alkaline		VOLCANIC ROCK	WR [4843]	46.07	3.48		15.23					12.05	11.7	5.87	0.166		0.886	2.52	0.426																0.21	104697
Atlantic	Canary Islands	Tenerife	Georoc 2020	[4843]	28.3	28.3	-16.83	-16.83	s_TE30	Basalt, Alkaline		VOLCANIC ROCK	WR [4843]	43.83	3.88		15.59					13.07	11.87	5.52	0.193		0.929	2.62	0.502																0.41	104698
Atlantic	Canary Islands	Tenerife	Georoc 2020	[4843]	28.3	28.3	-16.83	-16.83	s_TE31	Basalt, Alkaline		VOLCANIC ROCK	WR [4843]	45.86	3.47		14.97					11.93	11.68	6.15	0.169		0.904	2.64	0.435																-0.19	104699
Atlantic	Canary Islands	Tenerife	Georoc 2020	[4843]	28.3	28.3	-16.83	-16.83	s_TE32	Ankaramite		VOLCANIC ROCK	WR [4843]	45.3	2.77		11.6					11.37	13.67	10.53	0.17		0.682	2.16	0.343																-0.1	104700
Atlantic	Canary Islands	Tenerife	Georoc 2020	[4843]	28.3	28.3	-16.83	-16.83	s_TE33	Hawaiite		VOLCANIC ROCK	WR [4843]	49.59	3.17		16.68					10.57	8.28	3.56	0.195		1.548	3.92	0.936																0.37	104701
Atlantic	Canary Islands	Tenerife	Georoc 2020	[4843]	28.3	28.3	-16.83	-16.83	s_TE34	Ankaramite		VOLCANIC ROCK	WR [4843]	43.93	3.45		13					12.31	11.75	9.45	0.176		0.962	2.53	0.506																-0.07	104702
Atlantic	Canary Islands	Tenerife	Georoc 2020	[4843]	28.3	28.3	-16.83	-16.83	s_TE35	Hawaiite		VOLCANIC ROCK	WR [4843]	49.85	3.24		17.14					10.82	7.59	3.34	0.187		1.545	4.08	0.952																0.64	104703
Atlantic	Canary Islands	Tenerife	Georoc 2020	[4843]	28.3	28.3	-16.83	-16.83	s_TE36	Ankaramite		VOLCANIC ROCK	WR [4843]	44.41	2.87		11.71					11.95	11.74	12.01	0.179		0.826	2.25	0.404																-0.24	104704
Atlantic	Canary Islands	Tenerife	Georoc 2020	[4843]	28.3	28.3	-16.83	-16.83	s_TE15	Ankaramite		VOLCANIC ROCK	WR [4843]	43.89	3.15		12.34					12.5	11.68	10.39	0.183		0.921	2.56	0.44																-0.46	104705
Atlantic	Canary Islands	Tenerife	Georoc 2020	[4843]	28.3	28.3	-16.83	-16.83	s_TE41	Tephrite		VOLCANIC ROCK	WR [4843]	47.86	3.03		17.07					10.28	8.77	4.08	0.221		1.817	4.63	0.784																0.42	104706
Atlantic	Canary Islands	Tenerife	Georoc 2020	[4843]	28.3	28.3	-16.83	-16.83	s_TE42	Benmoreite		VOLCANIC ROCK	WR [4843]	58.55	1.05		20.08					4.57	4.15	0.92	0.2		2.856	6.84	0.198																0.69	104707
Atlantic	Canary Islands	Tenerife	Georoc 2020	[4843]	28.3	28.3	-16.83	-16.83	s_TE43	Ankaramite		VOLCANIC ROCK	WR [4843]	44.38	2.93		13.1					12.6	11.69	10.07	0.184		0.805	2.21	0.391																-0.3	104708
Atlantic	Canary Islands	Tenerife	Georoc 2020	[4843]	28.3	28.3	-16.83	-16.83	s_TE44	Benmoreite		VOLCANIC ROCK	WR [4843]	54.81	1.62		19.21					6.28	5.9	1.65	0.217		2.36	6.4	0.442																0.29	104709
Atlantic	Canary Islands	Tenerife	Georoc 2020	[4843]	28.3	28.3	-16.83	-16.83	s_TE45	Basanite		VOLCANIC ROCK	WR [4843]	44.86	3.44		14.91					11.68	10.58	6.85	0.202		1.381	3.82	0.796																-0.3	104710
Atlantic	Canary Islands	Tenerife	Georoc 2020	[4843]	28.3	28.3	-16.83	-16.83	s_TE46	Benmoreite		VOLCANIC ROCK	WR [4843]	58.69	1.05		20.54					4.54	4.2	0.97	0.167		2.879	5.89	0.192																1.7	104711
Atlantic	Canary Islands	La Palma	Georoc 2020	[4795]	28.5	28.5	-18	-18	s_KLA1502	Tephrite		VOLCANIC ROCK	WR [4795]	45.43	3.41		16.27					10.7	9.17	4.93	0.21		2.29	5.08	0.9	0.47												0.08				105250
Atlantic	Canary Islands	La Palma	Georoc 2020	[4795]	28.5	28.5	-18	-18	s_KLA1521	Not Given		VOLCANIC ROCK	WR [4795]	44.73	3.39		15.01					11.18	9.76	6.4	0.21		1.89	4.68	0.81	0.27												0				105252
Atlantic	Canary Islands	La Palma / Cumbre Vieja	Georoc 2020	[4795]	28.5	28.5	-18	-18	s_WHJ9224	Basanite		VOLCANIC ROCK	WR [4795]	43.76	3.42		13.7					12.33	10.69	8.18	0.2		1.28	3.76	0.7	0.26												0				105254
Atlantic	Canary Islands	La Palma	Georoc 2020	[4795]	28.5	28.5	-18	-18	s_KLA1203	Tephrite		VOLCANIC ROCK	WR [4795]	45.29	3.39		16.08					10.48	9.12	4.96	0.21		2.31	5.48	0.85	0.22												0				105255
Atlantic	Canary Islands	La Palma	Georoc 2020	[4795]	28.5	28.5	-18	-18	s_KLA1213	Basanite		VOLCANIC ROCK	WR [4795]	43.95	3.53		14.4					11.93	10.14	7.36	0.2		1.53	3.89	0.75	0.75												0				105258
Atlantic	Canary Islands	La Palma / Cumbre Vieja	Georoc 2020	[4795]	28.5	28.5	-18	-18	s_KLA1513	Basanite		VOLCANIC ROCK	WR [4795]	42.42	3.4		11.77					12.21	10.64	8.03	0.19		1.39	3.06	0.69	0.53												0				105260
Atlantic	Canary Islands	La Palma	Georoc 2020	[4795]	28.5	28.5	-18	-18	s_KLA1516	Tephrite		VOLCANIC ROCK	WR [4795]	43.54	3.62		12.82					12.09	10.97	9.84	0.21		1.42	3.29	0.84	0.3												0				105261
Atlantic	Canary Islands	La Palma	Georoc 2020	[4795]	28.5	28.5	-18	-18	s_WHJ9254	Phonotephrite		VOLCANIC ROCK	WR [4795]	47.14	3.13		15.76					10.06	8.5	5.51	0.21		2.49	5.19	0.83	0.36												0.06				105264
Atlantic	Canary Islands	La Palma	Georoc 2020	[4795]	28.5	28.5	-18	-18	s_KLA1509	Phonotephrite		VOLCANIC ROCK	WR [4795]	46.03	3.16		17.08					9.29	8.84	3.3	0.24		2.7	6.01	1.07	0.27												0				105265
Atlantic	Canary Islands	La Palma	Georoc 2020	[4795]	28.5	28.5	-18	-18	s_HUS251921	Phonotephrite		VOLCANIC ROCK	WR [4795]	45.38	3.09		16.13					9.69	8.89	3.57	0.24		2.69	6.07	1.14	0.31												0				105266
Atlantic	Canary Islands	La Palma	Georoc 2020	[4795]	28.5	28.5	-18	-18	s_KLA1517	Phonotephrite		VOLCANIC ROCK	WR [4795]	45.41	3.52		15.32					10.87	9.01	6.18	0.23		2.38	4.89	0.89	0.42												0.11				105267
Atlantic	Canary Islands	La Palma	Georoc 2020	[4795]	28.5	28.5	-18	-18	s_KLA1624	Basanite		VOLCANIC ROCK	WR [4795]	42.6	3.88		12.74					12.45	11.52	8.81	0.2		1.62	3.6	0.89	0.39												0				105268
Atlantic	Canary Islands	La Palma	Georoc 2020	[4795]	28.5	28.5	-18	-18	s_KLA1613	Phonolite		VOLCANIC ROCK	WR [4795]	54.36	1.12		20.21					4.27	3.91	0.86	0.17		4.18	8.42	0.23	0.23												0.35				105269
Atlantic	Canary Islands	La Palma	Georoc 2020	[4795]	28.5	28.5	-18	-18	s_KLA1502	Tephrite		VOLCANIC ROCK	GL [4795]	50.11	2.57		18.85					7.43	6.21	2.76	0.22		3.45	6.68	1.07							0.24	0.14				0.05					105335
Atlantic	Canary Islands	Tenerife / Las Canadas Caldera / Diego Hernandez Formation	Georoc 2020	[4846]	28	28.25	-16.25	-16.75	s_DH97-22D	Phonolite		VOLCANIC ROCK	WR [4846]	57.35	0.93		20.35					3.74	2.03	0.71	0.18		5.55	8.98	0.18																	105372
Atlantic	Canary Islands	Tenerife / Las Canadas Caldera / Diego Hernandez Formation	Georoc 2020	[4846]	28	28.25	-16.25	-16.75	s_DH97-4A	Phonolite		VOLCANIC ROCK	WR [4846]	56.55	1.67		19.47					5.15	3.72	1.63	0.17		4.73	6.49	0.42																	105375
Atlantic	Canary Islands	Tenerife / Las Canadas Caldera / Diego Hernandez Formation	Georoc 2020	[4846]	28.3	28.3	-16.6	-16.6	s_DH97-5A	Phonolite		VOLCANIC ROCK	WR [4846]	60.96	0.54		21.63					2.61	1.16	0.36	0.17		6.69	5.79	0.08																	105376
Atlantic	Canary Islands	Tenerife / Las Canadas Caldera / Diego Hernandez Formation	Georoc 2020	[4846]	28.3	28.3	-16.6	-16.6	s_96TF-4	Phonolite		VOLCANIC ROCK	WR [4846]	58.84	1.01		20.45					3.69	2.29	0.8	0.16		5.8	6.76	0.21																	105377
Atlantic	Canary Islands	Tenerife / Las Canadas Caldera / Diego Hernandez Formation	Georoc 2020	[4846]	28.3	28.3	-16.6	-16.6	s_96TF-3	Phonolite		VOLCANIC ROCK	WR [4846]	60.99	0.5		21.32					2.69	1.03	0.2	0.17		6.77	6.27	0.07																	105378
Atlantic	Canary Islands	Tenerife / Las Canadas Caldera / Diego Hernandez Formation	Georoc 2020	[4846]	28.3	28.3	-16.6	-16.6	s_DH97-9B	Phonolite		VOLCANIC ROCK	WR [4846]	60.96	0.56		20.75					2.73	1.18	0.42	0.16		6.22	6.92	0.09																	105379
Atlantic	Canary Islands	Tenerife / Las Canadas Caldera / Diego Hernandez Formation	Georoc 2020	[4846]	28.3	28.3	-16.6	-16.6	s_DH97-14	Phonolite		VOLCANIC ROCK	WR [4846]	60	0.65		23.07					3.81	0.84	0.49	0.26		5.23	5.6	0.06																	105380
Atlantic	Canary Islands	Tenerife / Las Canadas Caldera / Diego Hernandez Formation	Georoc 2020	[4846]	28.3	28.3	-16.6	-16.6	s_DH97-15	Phonolite		VOLCANIC ROCK	WR [4846]	60.04	0.65		22.05					3.9	0.84	0.48	0.24		5.47	6.24	0.07																	105381
Atlantic	Canary Islands	Tenerife / Las Canadas Caldera / Diego Hernandez Formation	Georoc 2020	[4846]	28.3	28.3	-16.6	-16.6	s_DH97-16	Phonolite		VOLCANIC ROCK	WR [4846]	60.19	0.77		22.14					3.81	1.11	0.55	0.24		5.29	5.83	0.08																	105382
Atlantic	Canary Islands	Tenerife / Las Canadas Caldera / Diego Hernandez Formation	Georoc 2020	[4846]	28.3	28.3	-16.6	-16.6	s_DH97-2WR	Phonolite		VOLCANIC ROCK	WR [4846]	60.89	0.83		18.58					2.72	1.95	0.5	0.18		5.8	8.44	0.11																	105383
Atlantic	Canary Islands	Tenerife / Las Canadas Caldera / Diego Hernandez Formation	Georoc 2020	[4846]	28.3	28.3	-16.6	-16.6	s_DH97-3WR	Phonolite		VOLCANIC ROCK	WR [4846]	60.45	0.94		18.81					2.79	3.18	0.74	0.15		4.75	8.01	0.19																	105384
Atlantic	Canary Islands	Tenerife / Las Canadas Caldera / Diego Hernandez Formation	Georoc 2020	[4846]	28.3	28.3	-16.6	-16.6	s_DH97-4WR	Phonolite		VOLCANIC ROCK	WR [4846]	59.5	0.67		19.12					3.16	1.41	0.54	0.23		5.53	9.76	0.07																	105385
Atlantic	Canary Islands	Tenerife / Las Canadas Caldera / Diego Hernandez Formation	Georoc 2020	[4846]	28.3	28.3	-16.6	-16.6	s_DH97-7	Not Given		VOLCANIC ROCK	WR [4846]	47.62	3.23		16.34					11.14	9.36	5.56	0.2		1.68	4.02	0.84																	105386
Atlantic	Canary Islands	Tenerife / Las Canadas Caldera / Diego Hernandez Formation	Georoc 2020	[4846]	28.3	28.3	-16.6	-16.6	s_DH97-12	Not Given		VOLCANIC ROCK	WR [4846]	44.61	4.11		16.56					11.86	11.33	5.34	0.2		1.5	3.34	1.15																	105387
Atlantic	Canary Islands	Tenerife / Las Canadas Caldera / Diego Hernandez Formation	Georoc 2020	[4846]	28.3	28.3	-16.6	-16.6	s_DH97-13	Not Given		VOLCANIC ROCK	WR [4846]	45.03	4.07		16.53					10.88	11.34	5.4	0.19		1.55	3.84	1.17																	105388
Atlantic	Canary Islands	Tenerife / Las Canadas Caldera / Diego Hernandez Formation	Georoc 2020	[4846]	28.3	28.3	-16.6	-16.6	s_DH97-17	Not Given		VOLCANIC ROCK	WR [4846]	44.82	4.11		16.47					11.88	11.21	5.33	0.19		1.38	3.47	1.13																	105389
Atlantic	Canary Islands	Tenerife / Las Canadas Caldera / Diego Hernandez Formation	Georoc 2020	[4846]	28.3	28.3	-16.6	-16.6	s_DH97-18A	Not Given		VOLCANIC ROCK	WR [4846]	45.84	3.32		15.24					11.2	9.96	8.21	0.2		1.43	3.64	0.95																	105390
Atlantic	Canary Islands	Tenerife / Las Canadas Caldera / Diego Hernandez Formation	Georoc 2020	[4846]	28.3	28.3	-16.6	-16.6	s_DH97-18B	Not Given		VOLCANIC ROCK	WR [4846]	45.94	3.43		15.77					10.99	10.01	7.01	0.2		1.52	4.1	1.04																	105391
Atlantic	Canary Islands	Tenerife / Las Canadas Caldera / Diego Hernandez Formation	Georoc 2020	[4846]	28.3	28.3	-16.6	-16.6	s_DH97-18C	Not Given		VOLCANIC ROCK	WR [4846]	46.45	3.65		16.98					10.39	10.12	4.82	0.21		1.76	4.46	1.17																	105392
Atlantic	Canary Islands	Tenerife / Las Canadas Caldera / Diego Hernandez Formation	Georoc 2020	[4846]	28.3	28.3	-16.6	-16.6	s_DH97-19A	Phonotephrite		VOLCANIC ROCK	WR [4846]	51.07	2.58		17.35					8.34	7.49	5.03	0.19		2.19	5.24	0.51																	105393
Atlantic	Canary Islands	Tenerife / Las Canadas Caldera / Diego Hernandez Formation	Georoc 2020	[4846]	28.3	28.3	-16.6	-16.6	s_DH97-19B	Phonotephrite		VOLCANIC ROCK	WR [4846]	50.98	2.42		17.15					8.35	7.1	4.73	0.18		2.98	5.6	0.51																	105394
Atlantic	Canary Islands	Tenerife / Las Canadas Caldera / Diego Hernandez Formation	Georoc 2020	[4846]	28.3	28.3	-16.6	-16.6	s_DH97-20	Not Given		VOLCANIC ROCK	WR [4846]	43.74	4.07		15.93					12.16	11.39	5.63	0.21		1.58	3.99	1.29																	105395
Atlantic	Canary Islands	Tenerife / Las Canadas Caldera / Diego Hernandez Formation	Georoc 2020	[4846]	28.3	28.3	-16.6	-16.6	s_DH97-28A	Not Given		VOLCANIC ROCK	WR [4846]	44.45	4.04		16.16					12.36	10.46	4.86	0.21		1.8	4.19	1.47																	105396
Atlantic	Canary Islands	Tenerife / Las Canadas Caldera / Diego Hernandez Formation	Georoc 2020	[4846]	28.3	28.3	-16.6	-16.6	s_DH97-28B	Not Given		VOLCANIC ROCK	WR [4846]	45.9	3.65		15.79					10.87	10.53	5.92	0.19		1.75	4.31	1.08																	105397
Atlantic	Canary Islands	Tenerife / Las Canadas Caldera / Diego Hernandez Formation	Georoc 2020	[4846]	28.3	28.3	-16.6	-16.6	s_DH97-29A	Not Given		VOLCANIC ROCK	WR [4846]	44.46	3.91		14.75					11.71	11.8	6.73	0.19		1.5	4	0.96																	105398
Atlantic	Canary Islands	Tenerife / Las Canadas Caldera / Diego Hernandez Formation	Georoc 2020	[4846]	28.3	28.3	-16.6	-16.6	s_DH97-29B	Not Given		VOLCANIC ROCK	WR [4846]	45.14	3.87		15.95					11.56	11.12	6.01	0.19		1.26	3.8	1.1																	105399
Atlantic	Canary Islands	Tenerife / Las Canadas Caldera / Diego Hernandez Formation	Georoc 2020	[4846]	28.3	28.3	-16.6	-16.6	s_DH97-30A	Not Given		VOLCANIC ROCK	WR [4846]	45.12	3.78		15.88					11.06	10.89	5.93	0.19		1.91	4.16	1.09																	105400
Atlantic	Canary Islands	Tenerife / Las Canadas Caldera / Diego Hernandez Formation	Georoc 2020	[4846]	28.3	28.3	-16.6	-16.6	s_DH97-30B	Not Given		VOLCANIC ROCK	WR [4846]	44.9	3.85		15.44					11.39	11.31	6.28	0.19		1.67	3.95	1.04																	105401
Atlantic	Canary Islands	La Palma / Taburiente	Georoc 2020	[916][19077]	28.699	28.699	-17.895	-17.895	s_LP134	Basanite / Basalt		VOLCANIC ROCK	WR [916]	44.44	3.41		12.07					11.55	11.15	10.3	0.18		1.3	2.71	0.53																1.3	106104-LP134
Atlantic	Canary Islands	Tenerife	Georoc 2020	[4847]	28.5	28.5	-16.3	-16.3	s_FAB	Ankaramite		VOLCANIC ROCK	WR [4847]	49.46	3.24		11.07	0.12				9.98	9.69	4.77	0.13		1.06	1.89	0.48																4.84	107063
Atlantic	Canary Islands	Tenerife	Georoc 2020	[4847]	28.5	28.5	-16.3	-16.3	s_AAB	Ankaramite		VOLCANIC ROCK	WR [4847]	48.87	3.02		10.41	0.1				8.76	10.18	5.51	0.15		0.65	2.17	0.46																6.37	107064
Atlantic	Canary Islands	Tenerife	Georoc 2020	[4847]	28.5	28.5	-16.3	-16.3	s_SCA	Ankaramite		VOLCANIC ROCK	WR [4847]	34.77	1.64		6.07					16.82	8.23	6.42	0.25		1.36	1.08	0.17																20.42	107067
Atlantic	Canary Islands	Tenerife	Georoc 2020	[4847]	28.5	28.5	-16.3	-16.3	s_SOA	Ankaramite		VOLCANIC ROCK	WR [4847]	25.69	0.97		3.42					28.31	6.54	4.83	0.45		0.79	0.92	0.1																22.69	107068
Atlantic	Canary Islands	Tenerife	Georoc 2020	[4847]	28.5	28.5	-16.3	-16.3	s_RJ	Not Given		VOLCANIC ROCK	WR [4847]	82.37	0.02		0.07					8.13	1.31	1.18	0.09		0.01	0.13	0.04																5.24	107070
Atlantic	Canary Islands	Tenerife	Georoc 2020	[4847]	28.5	28.5	-16.3	-16.3	s_GJ	Not Given		VOLCANIC ROCK	WR [4847]	83.5	0.01		0.15					7.52	0.42	1.03	0.07		0.94	0.18	0.04																5.26	107071
Atlantic	Canary Islands	El Hierro / Ad 2011-2012 Formation	Georoc 2020	[18397]	27.8	27.8	-18	-18	s_EH_15-10-11	Not Given		VOLCANIC ROCK	WR [18397]	44.13	4.26		14.88					13.68	10.01	5.97	0.21		1.63	4.16	1.07																	1071319
Atlantic	Canary Islands	El Hierro / Ad 2011-2012 Formation	Georoc 2020	[18397]	27.8	27.8	-18	-18	s_EH_27-11-11	Not Given		VOLCANIC ROCK	WR [18397]	43.4	4.66		13.84					13.32	11.01	7.52	0.19		1.51	3.69	0.86																	1071320
Atlantic	Canary Islands	El Hierro / Ad 2011-2012 Formation	Georoc 2020	[18397]	27.8	27.8	-18	-18	s_EH_06-12-11	Not Given		VOLCANIC ROCK	WR [18397]	43.28	4.68		13.79					13.43	10.96	7.72	0.19		1.49	3.62	0.84																	1071321
Atlantic	Canary Islands	El Hierro / Ad 2011-2012 Formation	Georoc 2020	[18397]	27.8	27.8	-18	-18	s_EH_28-01-12	Not Given		VOLCANIC ROCK	WR [18397]	43.16	4.68		13.28					13.31	11.28	8.48	0.18		1.42	3.41	0.79																	1071322
Atlantic	Canary Islands	Tenerife / Chinyero	Georoc 2020	[20707]	28.3	28.3	-16.6	-16.6	s_CHIN1	Basanite		VOLCANIC ROCK	WR [20707]	44	3.8		16.3					11.34	10.75	5.37	0.18		1.63	4.23	0.92																-0.63	1111113
Atlantic	Canary Islands	Tenerife / Chinyero	Georoc 2020	[20707]	28.3	28.3	-16.6	-16.6	s_CHIN3	Basanite		VOLCANIC ROCK	WR [20707]	43.9	3.82		16.4					11.38	10.75	5.34	0.18		1.64	4.22	0.94																-0.49	1111114
Atlantic	Canary Islands	Tenerife / Chinyero	Georoc 2020	[20707]	28.3	28.3	-16.6	-16.6	s_CHIN7	Basanite		VOLCANIC ROCK	WR [20707]	43.5	3.83		16					11.47	10.9	5.52	0.18		1.57	4.13	0.89																-0.46	1111115
Atlantic	Canary Islands	Tenerife / Chinyero	Georoc 2020	[20707]	28.3	28.3	-16.6	-16.6	s_CHIN8	Basanite		VOLCANIC ROCK	WR [20707]	43.7	3.83		16.2					11.38	10.85	5.47	0.18		1.61	4.17	0.91																-0.58	1111116
Atlantic	Canary Islands	Tenerife / Chinyero	Georoc 2020	[20707]	28.3	28.3	-16.6	-16.6	s_CHIN9	Basanite		VOLCANIC ROCK	WR [20707]	44.4	3.83		16.25					11.47	11	5.64	0.18		1.61	4.26	0.93																-0.71	1111117
Atlantic	Canary Islands	Tenerife / Chinyero	Georoc 2020	[20707]	28.3	28.3	-16.6	-16.6	s_CHIN10	Basanite		VOLCANIC ROCK	WR [20707]	43.3	3.8		15.9					11.43	10.85	5.56	0.17		1.57	4.11	0.89																-0.7	1111118
Atlantic	Canary Islands	Tenerife / Chinyero	Georoc 2020	[20707]	28.3	28.3	-16.6	-16.6	s_CHIN21	Basanite		VOLCANIC ROCK	WR [20707]	44	3.77		16.25					11.25	10.75	5.37	0.18		1.63	4.28	0.94																-0.72	1111119
Atlantic	Canary Islands	Tenerife / Chinyero	Georoc 2020	[20707]	28.3	28.3	-16.6	-16.6	s_CHIN22	Basanite		VOLCANIC ROCK	WR [20707]	43.9	3.78		16.1					11.16	10.65	5.33	0.18		1.59	4.11	0.92																-0.55	1111120
Atlantic	Canary Islands	Tenerife / Chinyero	Georoc 2020	[20707]	28.3	28.3	-16.6	-16.6	s_CHIN-LL	Basanite		VOLCANIC ROCK	WR [20707]	44.1	3.86		16.4					11.92	10.8	5.38	0.19		1.61	4.18	0.88																-0.58	1111121
Atlantic	Canary Islands	Tenerife / Chinyero	Georoc 2020	[20707]	28.3	28.3	-16.6	-16.6	s_CHIN-LF	Basanite		VOLCANIC ROCK	WR [20707]	45.1	3.85		16.5					11.83	10.85	5.44	0.19		1.63	4.25	0.9																-0.42	1111122
Atlantic	Canary Islands	Lanzarote	Georoc 2020	[20766]	29	29	-13.6	-13.6	s_3-5 CC	Not Given		VOLCANIC ROCK	WR [20766]	42.2178	2.94873		10.429					11.92	9.52292	16.6881	0.191998		1.47117	2.98255	1.02337		-0.22	-0.74														1120061
Atlantic	Canary Islands	Lanzarote	Georoc 2020	[20766]	29	29	-13.6	-13.6	s_3-6 CC	Not Given		VOLCANIC ROCK	WR [20766]	41.7078	3.06539		10.8657					11.87	10.3722	14.6445	0.196176		1.48855	3.13555	1.09539		0	-0.57														1120062
Atlantic	Canary Islands	Lanzarote	Georoc 2020	[20766]	29	29	-13.6	-13.6	s_6-1 PP	Not Given		VOLCANIC ROCK	WR [20766]	44.7612	2.68525		12.7078					11.53	10.5122	11.7431	0.17982		1.05792	3.16809	0.66973		0.0447708	-0.743195														1120063
Atlantic	Canary Islands	Lanzarote	Georoc 2020	[20766]	29	29	-13.6	-13.6	s_6-3 PP	Not Given		VOLCANIC ROCK	WR [20766]	46.528	2.40176		11.7878					11.05	9.62763	13.3697	0.170141		0.799693	2.99188	0.566324		0.07	-0.53														1120064
Atlantic	Canary Islands	Lanzarote	Georoc 2020	[20766]	29	29	-13.6	-13.6	s_17-1 VQ	Not Given		VOLCANIC ROCK	WR [20766]	47.2292	2.42643		12.8078					10.98	9.07267	11.243	0.161791		0.816129	3.01016	0.421346		0.0342906	-0.325761														1120065
Atlantic	Canary Islands	Lanzarote	Georoc 2020	[20766]	29	29	-13.6	-13.6	s_5-1 MS	Not Given		VOLCANIC ROCK	WR [20766]	49.0372	2.49108		12.9622					10.59	9.04916	9.75268	0.148333		0.764331	2.89085	0.36647		0.109857	0.139818														1120066
Atlantic	Canary Islands	Lanzarote	Georoc 2020	[20766]	29	29	-13.6	-13.6	s_8-2 MF	Not Given		VOLCANIC ROCK	WR [20766]	49.1482	2.41379		12.783					10.66	9.69831	10.0411	0.157235		0.716014	2.806	0.431739		0.07	-0.46														1120067
Atlantic	Canary Islands	Lanzarote	Georoc 2020	[20766]	29	29	-13.6	-13.6	s_19-1 LH	Not Given		VOLCANIC ROCK	WR [20766]	48.7061	2.39848		13.0432					10.66	8.81781	10.2808	0.157999		0.768687	2.80376	0.402997		0.0528374	0.0951073														1120068
Atlantic	Canary Islands	Lanzarote	Georoc 2020	[20766]	29	29	-13.6	-13.6	s_2-1 MN	Not Given		VOLCANIC ROCK	WR [20766]	50.2335	2.35336		12.9972					10.49	9.28367	10.0459	0.150877		0.621388	2.56908	0.322951		0.15	-0.5														1120069
Atlantic	Canary Islands	Lanzarote	Georoc 2020	[20766]	29	29	-13.6	-13.6	s_1-3 MC	Not Given		VOLCANIC ROCK	WR [20766]	50.4129	2.40947		13.3749					10.25	8.62164	9.69204	0.148517		0.705364	2.58845	0.366909		0.0682527	0.438768														1120070
Atlantic	Canary Islands	Lanzarote	Georoc 2020	[20766]	29	29	-13.6	-13.6	s_LZ-TAO	Not Given		VOLCANIC ROCK	WR [20766]	43.9152	2.6279		11.5938					10.95	10.9638	13.4422	0.178915		1.18048	3.28495	0.943794		0.02	-0.53														1120071
Atlantic	Canary Islands	La Palma / Teneguia	Georoc 2020	[20793]	28.57	28.57	-17.87	-17.87	s_LA PALMA 1971	Basalt		VOLCANIC ROCK	WR [20793]	43	3.72									7.73																						1132562
Atlantic	Canary Islands	Tenerife / Pico Teide	Georoc 2020	[17430]	28.3	28.3	-16.6	-16.6	s_AD-36	Not Given		VOLCANIC ROCK	WR [17430]	44.9	3.36		12.77			2.93	9.41		10.32	10.57	0.19		1.2	2.7	0.79	0.73																1135910
Atlantic	Canary Islands	Tenerife / Pico Teide	Georoc 2020	[17430]	28.3	28.3	-16.6	-16.6	s_AD-33	Not Given		VOLCANIC ROCK	WR [17430]	43.05	3.32		13.54			3.6	9.38		10.78	7.49	0.2		1.77	4.07	1.83	0.78																1135911
Atlantic	Canary Islands	Tenerife / Pico Teide	Georoc 2020	[17430]	28.3	28.3	-16.6	-16.6	s_AD-10	Not Given		VOLCANIC ROCK	WR [17430]	47.25	2.72		13.44			2.69	10.41		10.6	6.48	0.19		1.05	4.36	0.73	0.05																1135912
Atlantic	Canary Islands	Tenerife / Pico Viejo	Georoc 2020	[17430]	28.3	28.3	-16.6	-16.6	s_AD-25	Not Given		VOLCANIC ROCK	WR [17430]	47.3	2.94		16.72			3.71	6.85		8.76	4.73	0.22		2.1	5.19	1.4																	1135913
Atlantic	Canary Islands	Tenerife / Pico Viejo	Georoc 2020	[17430]	28.3	28.3	-16.6	-16.6	s_AD-23	Not Given		VOLCANIC ROCK	WR [17430]	47.34	2.72		17.77			5.05	4.81		7.91	4.07	0.21		2.67	5.19	1.3	0.75																1135914
Atlantic	Canary Islands	Tenerife / Pico Viejo	Georoc 2020	[17430]	28.3	28.3	-16.6	-16.6	s_AD-20	Not Given		VOLCANIC ROCK	WR [17430]	48.5	2.83		16.43			3.34	7.18		8.39	4.33	0.19		2.58	4.84	1.03	0.1																1135915
Atlantic	Canary Islands	Tenerife / Pico Teide	Georoc 2020	[17430]	28.3	28.3	-16.6	-16.6	s_AD-12	Not Given		VOLCANIC ROCK	WR [17430]	47	2.07		17.02			4.25	5.53		8.38	3.94	0.22		3.02	7.59		0.02																1135916
Atlantic	Canary Islands	Tenerife / Pico Teide	Georoc 2020	[17430]	28.3	28.3	-16.6	-16.6	s_AD-24	Not Given		VOLCANIC ROCK	WR [17430]	49.67	2.39		17.2			3.58	5.72		7.03	3.82	0.21		3.21	6.47		0.61																1135917
Atlantic	Canary Islands	Tenerife / Pico Teide	Georoc 2020	[17430]	28.3	28.3	-16.6	-16.6	s_AD-7	Not Given		VOLCANIC ROCK	WR [17430]	48.75	2.5		18.06			3.76	6.38		6.91	3.82	0.21		2.58	5.78	1.07	0.16																1135918
Atlantic	Canary Islands	Tenerife / Pico Viejo	Georoc 2020	[17430]	28.3	28.3	-16.6	-16.6	s_AD-22	Not Given		VOLCANIC ROCK	WR [17430]	49.68	2.72		16.43			4.72	5.52		7.68	3.7	0.2		2.67	5.19	1.08	0.21																1135919
Atlantic	Canary Islands	Tenerife / Pico Viejo	Georoc 2020	[17430]	28.3	28.3	-16.6	-16.6	s_AD-19	Not Given		VOLCANIC ROCK	WR [17430]	52.04	2.07		17.6			1.81	6.13		6.22	2.91	0.18		3.52	6.46	1.07																	1135920
Atlantic	Canary Islands	Tenerife / Pico Teide	Georoc 2020	[17430]	28.3	28.3	-16.6	-16.6	s_AD-4	Not Given		VOLCANIC ROCK	WR [17430]	54.45	2.28		18.06			2.7	7.34		0.39	3.88	0.18		2.75	5.78	0.95	0.63																1135921
Atlantic	Canary Islands	Tenerife / Pico Teide	Georoc 2020	[17430]	28.3	28.3	-16.6	-16.6	s_AD-48	Not Given		VOLCANIC ROCK	WR [17430]	54.5	1.69		17.43			3.01	4.2		4.37	2.36	0.16		3.96	7.35	0.48	0.27																1135922
Atlantic	Canary Islands	Tenerife / Pico Viejo	Georoc 2020	[17430]	28.3	28.3	-16.6	-16.6	s_AD-27	Not Given		VOLCANIC ROCK	WR [17430]	55.75	0.77		20.9			1.21	2.43		2.8	1.44	0.12		4.22	8.22	0.23	1.04																1135923
Atlantic	Canary Islands	Tenerife / Pico Teide	Georoc 2020	[17430]	28.3	28.3	-16.6	-16.6	s_AD-21	Not Given		VOLCANIC ROCK	WR [17430]	55.66	1.03		18.81			1.38	4.64		3.72	1.65	0.19		4.2	7.59	0.47	0.17																1135924
Atlantic	Canary Islands	Tenerife / Pico Teide	Georoc 2020	[17430]	28.3	28.3	-16.6	-16.6	s_AD-45	Not Given		VOLCANIC ROCK	WR [17430]	57.05	1.69		17.92			4.06	2.09		3.69	1.59	0.17		3.85	7.09	0.1	0.59																1135925
Atlantic	Canary Islands	Tenerife / Pico Teide	Georoc 2020	[17430]	28.3	28.3	-16.6	-16.6	s_AD-5	Not Given		VOLCANIC ROCK	WR [17430]	55.66	1.03		19.56			2.33	3.42		3.46	1.31	0.2		4.2	7.59	0.33	0.46																1135926
Atlantic	Canary Islands	Tenerife / Pico Viejo	Georoc 2020	[17430]	28.3	28.3	-16.6	-16.6	s_AD-51	Not Given		VOLCANIC ROCK	WR [17430]	60.15	0.96		17.56			3.29	1.26		1.79	0.93	0.17		4.68	8.21	0.16	0.75																1135927
Atlantic	Canary Islands	Tenerife / Pico Viejo	Georoc 2020	[17430]	28.3	28.3	-16.6	-16.6	s_AD-18	Not Given		VOLCANIC ROCK	WR [17430]	56.89	1.23		19.26			1.32	3.97		2.62	1.06	0.18		4.58	7.92	0.37	0.41																1135928
Atlantic	Canary Islands	Tenerife / Pico Teide	Georoc 2020	[17430]	28.3	28.3	-16.6	-16.6	s_AD-3	Not Given		VOLCANIC ROCK	WR [17430]	60.9	1.03		18.65			0.43	2.7		0.98	0.45	0.14		5.24	8.28	0.16	0.35																1135929
Atlantic	Canary Islands	Tenerife / Pico Teide	Georoc 2020	[17430]	28.3	28.3	-16.6	-16.6	s_AD-37	Not Given		VOLCANIC ROCK	WR [17430]	63.5	0.81		17.18			1.42	1.33		1.16	0.33	0.14		5.01	7.8	0.11	1.12																1135930
Atlantic	Canary Islands	Tenerife / Pico Viejo	Georoc 2020	[17430]	28.3	28.3	-16.6	-16.6	s_AD-13	Not Given		VOLCANIC ROCK	WR [17430]	59.37	0.33		19.7			2.17	1.81		0.45	0.34	0.2		5.64	9.11	0.11	0.66																1135931
Atlantic	Canary Islands	Tenerife / Pico Viejo	Georoc 2020	[17430]	28.3	28.3	-16.6	-16.6	s_AD-17	Not Given		VOLCANIC ROCK	WR [17430]	59.37	0.82		19.86			1.78	2.16		0.3	0.3	0.21		5.64	9.11	0.09	0.35																1135932
Atlantic	Canary Islands	Tenerife / Pico Teide	Georoc 2020	[17430]	28.3	28.3	-16.6	-16.6	s_AD-26	Not Given		VOLCANIC ROCK	WR [17430]	59.6	0.52		19.25			2.02	1.95		0.3	0.23	0.21		5.82	9.11		0.9																1135933
Atlantic	Canary Islands	Tenerife / Las Canadas Caldera / Diego Hernandez Formation	Georoc 2020	[17429]	28.3	28.3	-16.6	-16.6	s_C3	Not Given		VOLCANIC ROCK	WR [17429]	49.23	1.88		18.57			0.77	5.11		4.67	1.8	0.14		3.92	6.88	0.46																	1135991
Atlantic	Canary Islands	Tenerife / Las Canadas Caldera / Diego Hernandez Formation	Georoc 2020	[17429]	28.3	28.3	-16.6	-16.6	s_C8	Not Given		VOLCANIC ROCK	WR [17429]	61.2	0.46		19.99			0.37	2.45		0.86	0.24	0.55		6.16	7.69	0.02																	1135992
Atlantic	Canary Islands	Tenerife / Las Canadas Caldera / Diego Hernandez Formation	Georoc 2020	[17429]	28.3	28.3	-16.6	-16.6	s_AD-10	Not Given		VOLCANIC ROCK	WR [17429]	47.25	2.72		16.72			2.69	10.41		10.6	6.48	0.19		1.05	4.36	0.73																	1135993
Atlantic	Canary Islands	Tenerife / Pico Viejo	Georoc 2020	[17428]	28.3	28.3	-16.6	-16.6	s_81854	Phonolite		VOLCANIC ROCK	WR [17428]	59.14	0.71		19.35			2.23	1.57		0.8	0.45	0.2		5.51	9.52	0.1		0.74															1135994
Atlantic	Canary Islands	Tenerife / Pico Viejo	Georoc 2020	[17428]	28.3	28.3	-16.6	-16.6	s_81884	Phonolite		VOLCANIC ROCK	WR [17428]	58.9	0.63		19.24			1.4	2.24		0.67	0.54	0.19		5.49	10.01	0.08		0.26															1135995
Atlantic	Canary Islands	Tenerife / Pico Viejo	Georoc 2020	[17428]	28.3	28.3	-16.6	-16.6	s_80200	Phonolite		VOLCANIC ROCK	WR [17428]	58.79	0.63		19.08			1.79	1.87		0.82	0.64	0.19		5.44	9.59	0.08		1.54															1135996
Atlantic	Canary Islands	Tenerife / Pico Viejo	Georoc 2020	[17428]	28.3	28.3	-16.6	-16.6	s_80197	Phonolite		VOLCANIC ROCK	WR [17428]	57.98	0.64		18.51			2.74	1.04		0.7	0.52	0.19		5.46	9.91	0.08		1.69															1135997
Atlantic	Canary Islands	Tenerife / Pico Viejo	Georoc 2020	[17428]	28.3	28.3	-16.6	-16.6	s_82166	Phonolite		VOLCANIC ROCK	WR [17428]	59.27	0.64		19.34			2.62	1.22		0.71	0.46	0.28		5.55	9.66	0.07		0.71															1135998
Atlantic	Canary Islands	Tenerife / Pico Viejo	Georoc 2020	[17428]	28.3	28.3	-16.6	-16.6	s_81874	Phonolite		VOLCANIC ROCK	WR [17428]	59.9	0.76		18.6			1.44	1.8		0.84	0.52	0.16		5.42	9.43	0.12		0.98															1135999
Atlantic	Canary Islands	Tenerife / Pico Viejo	Georoc 2020	[17428]	28.3	28.3	-16.6	-16.6	s_80195	Phonolite		VOLCANIC ROCK	WR [17428]	59.58	0.64		19.28			1.76	2.02		0.72	0.72	0.28		5.48	9.61	0.08		0.34															1136000
Atlantic	Canary Islands	Tenerife / Pico Viejo	Georoc 2020	[17428]	28.3	28.3	-16.6	-16.6	s_81857	Phonolite		VOLCANIC ROCK	WR [17428]	58.55	0.75		19.17			1.86	1.41		0.84	0.58	0.25		5.34	9.36	0.11		0.43															1136001
Atlantic	Canary Islands	Tenerife / Pico Viejo	Georoc 2020	[17428]	28.3	28.3	-16.6	-16.6	s_22894	Phonolite		VOLCANIC ROCK	WR [17428]	58	0.64		18.48			1.49	2.17		0.69	0.55	0.19		5.56	10.09	0.08		0.27															1136002
Atlantic	Canary Islands	Tenerife / Pico Viejo	Georoc 2020	[17428]	28.3	28.3	-16.6	-16.6	s_81855	Phonolite		VOLCANIC ROCK	WR [17428]	55.56	1.07		19.42			2.84	1.8		1.99	0.78	0.26		5.36	9.59	0.1		2.14															1136003
Atlantic	Canary Islands	Tenerife / Pico Viejo	Georoc 2020	[17428]	28.3	28.3	-16.6	-16.6	s_81860	Phonolite		VOLCANIC ROCK	WR [17428]	59.26	0.71		19.5			2.09	1.52		0.81	0.66	0.29		5.42	9.28	0.09		1.14															1136004
Atlantic	Canary Islands	Tenerife / Pico Viejo	Georoc 2020	[17428]	28.3	28.3	-16.6	-16.6	s_79692	Phonolite		VOLCANIC ROCK	WR [17428]	57.76	0.68		18.13			1.64	1.95		0.72	0.87	0.19		5.71	9.5	0.02		2.88															1136006
Atlantic	Canary Islands	Tenerife / Pico Viejo	Georoc 2020	[17428]	28.3	28.3	-16.6	-16.6	s_80207	Phonolite		VOLCANIC ROCK	WR [17428]	58.72	0.63		19.09			1.76	1.96		0.68	0.26	0.29		5.53	9.9	0.08		1.8															1136007
Atlantic	Canary Islands	Tenerife / Pico Viejo	Georoc 2020	[17428]	28.3	28.3	-16.6	-16.6	s_79695	Phonolite		VOLCANIC ROCK	WR [17428]	58.53	0.61		18.7			2.08	1.58		0.7	0.31	0.2		5.64	10.13	0.08		0.38															1136008
Atlantic	Canary Islands	Tenerife / Pico Viejo	Georoc 2020	[17428]	28.3	28.3	-16.6	-16.6	s_81856	Phonolite		VOLCANIC ROCK	WR [17428]	58.83	0.69		19.55			2.7	1.08		0.76	0.63	0.28		5.69	9.57	0.08		0.67															1136009
Atlantic	Canary Islands	Tenerife / Pico Viejo	Georoc 2020	[17428]	28.3	28.3	-16.6	-16.6	s_80199	Phonolite		VOLCANIC ROCK	WR [17428]	58.12	0.63		18.99			1.54	2.09		0.68	0.28	0.28		5.6	10.19	0.08		0.16															1136010
Atlantic	Canary Islands	Tenerife / Pico Viejo	Georoc 2020	[17428]	28.3	28.3	-16.6	-16.6	s_81872	Phonolite		VOLCANIC ROCK	WR [17428]	57.86	0.65		18.97			1.27	2.02		0.76	0.35	0.27		5.64	10.9	0.09		1.56															1136011
Atlantic	Canary Islands	Tenerife / Taoro	Georoc 2020	[17427]	28.3	28.3	-16.6	-16.6	s_TAO-1	Basalt, Plagioclase		VOLCANIC ROCK	WR [17427]	46.64	2.65		20.28			2.67	5.62		7.46	5.56	0.23		2.44	5.53	0.92																	1136012
Atlantic	Canary Islands	Tenerife / Taoro	Georoc 2020	[17427]	28.3	28.3	-16.6	-16.6	s_TAO-2	Basalt, Plagioclase		VOLCANIC ROCK	WR [17427]	47.55	2.93		17.79			1.74	7.11		7.54	4.96	0.18		2.71	6.36	1.12																	1136013
Atlantic	Canary Islands	Tenerife / Taoro	Georoc 2020	[17427]	28.3	28.3	-16.6	-16.6	s_TAO-3	Basalt, Amphibole-Plagioclase		VOLCANIC ROCK	WR [17427]	49.43	2.59		18.66			3.16	4.92		6.58	4.53	0.19		2.89	6.19	0.87																	1136014
Atlantic	Canary Islands	Tenerife / Llano De Los Infantes (Siete Fuentes)	Georoc 2020	[17427]	28.3	28.3	-16.6	-16.6	s_LLIF-1	Basalt, Pyroxene-Olivine		VOLCANIC ROCK	WR [17427]	43.15	3.55		16.7			3.78	8.6		10.73	8.22	0.18		1.52	3.37	0.76		0.16															1136015
Atlantic	Canary Islands	Tenerife / Llano De Los Infantes (Siete Fuentes)	Georoc 2020	[17427]	28.3	28.3	-16.6	-16.6	s_LLIF-2	Basalt, Pyroxene-Olivine		VOLCANIC ROCK	WR [17427]	43.79	3.53		16.96			2.66	9.17		9.88	7.42	0.18		1.61	3.83	0.76		0.17															1136016
Atlantic	Canary Islands	Tenerife / Llano De Los Infantes (Siete Fuentes)	Georoc 2020	[17427]	28.3	28.3	-16.6	-16.6	s_LLIF-3	Basalt, Pyroxene-Olivine		VOLCANIC ROCK	WR [17427]	43.79	3.6		15.14			3.22	8.48		10.88	8.36	0.23		1.61	3.58	0.77		0.15															1136017
Atlantic	Canary Islands	Tenerife / Llano De Los Infantes (Siete Fuentes)	Georoc 2020	[17427]	28.3	28.3	-16.6	-16.6	s_LLIF-4	Basalt, Pyroxene-Olivine		VOLCANIC ROCK	WR [17427]	43.16	3.41		14.46			3.47	8.79		10.03	9.89	0.17		1.63	3.52	0.71		0.26															1136018
Atlantic	Canary Islands	Tenerife / Llano De Los Infantes (Siete Fuentes)	Georoc 2020	[17427]	28.3	28.3	-16.6	-16.6	s_LLIF-5	Basalt, Pyroxene-Olivine		VOLCANIC ROCK	WR [17427]	43.52	3.4		16.32			4.82	7.31		10.03	8.75	0.17		1.5	3.77	0.72		0.11															1136019
Atlantic	Canary Islands	Tenerife / Montana Negra	Georoc 2020	[17427]	28.3	28.3	-16.6	-16.6	s_GAR-1	Basalt, Pyroxene-Olivine		VOLCANIC ROCK	WR [17427]	42.14	3.55		14.08			3.73	8.46		9.74	8.33	0.17		1.61	3.72	0.73		0.38															1136020
Atlantic	Canary Islands	Tenerife / Montana Negra	Georoc 2020	[17427]	28.3	28.3	-16.6	-16.6	s_GAR-2	Basalt, Pyroxene-Olivine		VOLCANIC ROCK	WR [17427]	41.71	3.9		14.2			4.22	8.99		10.74	10.28	0.2		1.5	3.42	0.69		0.19															1136021
Atlantic	Canary Islands	Tenerife / Montana Negra	Georoc 2020	[17427]	28.3	28.3	-16.6	-16.6	s_GAR-3	Basalt, Pyroxene-Olivine		VOLCANIC ROCK	WR [17427]	47.16	2.98		17.88			3.65	5.38		7.21	5.61	0.2		2.19	5.48	0.63		0.32															1136022
Atlantic	Canary Islands	Tenerife / Montana Negra	Georoc 2020	[17427]	28.3	28.3	-16.6	-16.6	s_GAR-4	Basalt, Pyroxene-Amphibole		VOLCANIC ROCK	WR [17427]	47.15	3.22		17.98			2.28	6.9		7.37	5.96	0.27		2.28	5.62	0.66		0.22															1136023
Atlantic	Canary Islands	Tenerife / Montana Negra	Georoc 2020	[17427]	28.3	28.3	-16.6	-16.6	s_GAR-5	Basalt, Pyroxene-Amphibole		VOLCANIC ROCK	WR [17427]	47.65	2.99		17.85			3.38	5.92		7.11	5.41	0.2		2.2	5.78	0.63		0.13															1136024
Atlantic	Canary Islands	Tenerife / Montana Negra	Georoc 2020	[17427]	28.3	28.3	-16.6	-16.6	s_GAR-6	Basalt, Amphibole-Pyroxene		VOLCANIC ROCK	WR [17427]	47.4	3.07		19.28			3.31	5.82		6.98	5.41	0.2		2.2	5.79	0.62		0.12															1136025
Atlantic	Canary Islands	Tenerife / Las Canadas Caldera	Georoc 2020	[17427]	28.23	28.23	-16.69	-16.69	s_CHA-1	Basalt, Plagioclase-Amphibole		VOLCANIC ROCK	WR [17427]	48.43	2.81		18.72			5.11	3.71		5.47	5.41	0.2		2.44	6.03	0.55		0.48															1136026
Atlantic	Canary Islands	Tenerife / Las Canadas Caldera	Georoc 2020	[17427]	28.23	28.23	-16.69	-16.69	s_CHA-2	Basalt, Plagioclase-Amphibole		VOLCANIC ROCK	WR [17427]	48.79	2.87		18.56			3.94	4.99		6.57	4.42	0.21		2.41	5.82	0.56		0.23															1136027
Atlantic	Canary Islands	Tenerife / Las Canadas Caldera	Georoc 2020	[17427]	28.23	28.23	-16.69	-16.69	s_CHA-3	Basalt, Plagioclase-Amphibole		VOLCANIC ROCK	WR [17427]	48.78	2.96		18.09			2.06	6.26		6.68	5.2	0.21		2.66	6.11	1.03		0.16															1136028
Atlantic	Canary Islands	Tenerife / Las Canadas Caldera	Georoc 2020	[17427]	28.23	28.23	-16.69	-16.69	s_CHA-4	Basalt, Plagioclase		VOLCANIC ROCK	WR [17427]	49.57	2.72		18.25			1.98	6.1		6.93	3.65	0.2		2.54	5.59	1.38		0.2															1136029
Atlantic	Canary Islands	Tenerife / Las Canadas Caldera	Georoc 2020	[17427]	28.23	28.23	-16.69	-16.69	s_CHA-5	Basalt, Plagioclase		VOLCANIC ROCK	WR [17427]	49.3	3.15		18.5			1.79	6.21		6.35	4.06	0.3		2.55	5.54	1.1		0.24															1136030
Atlantic	Canary Islands	Tenerife / Las Canadas Caldera	Georoc 2020	[17427]	28.23	28.23	-16.69	-16.69	s_CHA-6	Basalt, Plagioclase		VOLCANIC ROCK	WR [17427]	48.26	3.04		18.11			3.1	5.36		6.74	5.2	0.25		2.87	6.25	1.15		0.25															1136031
Atlantic	Canary Islands	Tenerife / Las Canadas Caldera	Georoc 2020	[17427]	28.23	28.23	-16.69	-16.69	s_CHA-7	Basalt, Plagioclase		VOLCANIC ROCK	WR [17427]	49.23	2.76		18.46			1.92	6.32		7.94	4.08	0.2		2.5	5.72	0.54		0.34															1136032
Atlantic	Canary Islands	Tenerife / Las Canadas Caldera	Georoc 2020	[17427]	28.23	28.23	-16.69	-16.69	s_CHA-8	Basalt, Plagioclase-Amphibole		VOLCANIC ROCK	WR [17427]	49.76	2.85		18.22			4.25	4.29		5.61	5.21	0.2		2.39	6.21	0.56		0.17															1136033
Atlantic	Canary Islands	Tenerife / Las Canadas Caldera	Georoc 2020	[17427]	28.23	28.23	-16.69	-16.69	s_CHA-9	Basalt, Plagioclase		VOLCANIC ROCK	WR [17427]	48.52	2.86		18.37			3.06	6.45		6.49	4.46	0.2		2.64	5.39	1.06		0.21															1136034
Atlantic	Canary Islands	Tenerife / Chinyero	Georoc 2020	[17427]	28.3	28.3	-16.6	-16.6	s_CHY-1	Basalt, Pyroxene-Plagioclase		VOLCANIC ROCK	WR [17427]	43.96	3.81		16.81			2.67	8.77		10.59	5.79	0.17		1.7	4.19	0.96		0.14															1136035
Atlantic	Canary Islands	Tenerife / Chinyero	Georoc 2020	[17427]	28.3	28.3	-16.6	-16.6	s_CHY-2	Basalt, Pyroxene-Plagioclase		VOLCANIC ROCK	WR [17427]	44.2	3.75		17.24			3.75	7.74		9.18	6.6	0.2		1.61	3.95	0.96		0.19															1136036
Atlantic	Canary Islands	Tenerife / Chinyero	Georoc 2020	[17427]	28.3	28.3	-16.6	-16.6	s_CHY-3	Basalt, Pyroxene-Plagioclase		VOLCANIC ROCK	WR [17427]	43.95	3.74		17.24			3.18	8.21		9.88	6.19	0.19		1.66	4.05	0.95		0.16															1136037
Atlantic	Canary Islands	Tenerife / Chinyero	Georoc 2020	[17427]	28.3	28.3	-16.6	-16.6	s_CHY-4	Basalt, Pyroxene-Plagioclase		VOLCANIC ROCK	WR [17427]	43.53	3.76		17.24			2.68	8.77		10.02	5.99	0.21		1.71	4.65	0.89		0.17															1136038
Atlantic	Canary Islands	Tenerife	Georoc 2020	[5216]	28	28.6	-16.1	-16.9	s_T16	Trachyte		VOLCANIC ROCK	WR [5216]	59.6	1.47		18.93			3.96	2.64		3.5	1.42	0.17		3.77	7.48	0.3																	116189
Atlantic	Canary Islands	Gran Canaria / Tejeda Caldera / Mogan Formation	Georoc 2020	[5160]	28	28	-15.6	-15.6	s_1	Comendite		VOLCANIC ROCK	WR [5160]	69.29	0.68		12.57					3.85	0.37	0.36	0.19		4.78	5.29	0.06	0.91				0.06								0.03				119185
Atlantic	Canary Islands	Gran Canaria / Tejeda Caldera / Mogan Formation	Georoc 2020	[5160]	28	28	-15.6	-15.6	s_2	Not Given		VOLCANIC ROCK	WR [5160]	65.59	1.01		13.89					5.21	0.37	0.62	0.2		5.06	6	0.11	0.7				0.09								0.02				119186
Atlantic	Canary Islands	Gran Canaria / Tejeda Caldera / Mogan Formation	Georoc 2020	[5160]	28	28	-15.6	-15.6	s_3	Trachyte		VOLCANIC ROCK	WR [5160]	62.42	1.29		14.3					5.04	1.74	1.27	0.2		3.66	6.85	0.59	0.6				0.09								0.11				119187
Atlantic	Canary Islands	Gran Canaria / Tejeda Caldera / Mogan Formation	Georoc 2020	[5160]	28	28	-15.6	-15.6	s_4	Comendite		VOLCANIC ROCK	WR [5160]	69.25	0.59		12.65					3.95	0.29	0.28	0.18		4.85	5.2	0.03	0.87				0.05								0.01				119188
Atlantic	Canary Islands	Gran Canaria / Tejeda Caldera / Mogan Formation	Georoc 2020	[5160]	28	28	-15.6	-15.6	s_5	Not Given		VOLCANIC ROCK	WR [5160]	65.61	1.09		14.19					4.77	0.66	0.55	0.26		4.21	6.12	0.22	0.72				0.08								0.01				119189
Atlantic	Canary Islands	Gran Canaria / Tejeda Caldera / Mogan Formation	Georoc 2020	[5160]	28	28	-15.6	-15.6	s_6	Trachyte		VOLCANIC ROCK	WR [5160]	64.4	1.28		14.5					5.4	1.28	1.19	0.16		3.96	5.71	0.36	0.65				0.05								0				119190
Atlantic	Canary Islands	Gran Canaria / Tejeda Caldera / Mogan Formation	Georoc 2020	[5160]	28	28	-15.6	-15.6	s_7	Comendite		VOLCANIC ROCK	WR [5160]	69.14	0.55		12.87					4.36	0.25	0.27	0.21		4.88	5.08	0.04	0.65				0.12								0.01				119191
Atlantic	Canary Islands	Gran Canaria / Tejeda Caldera / Mogan Formation	Georoc 2020	[5160]	28	28	-15.6	-15.6	s_8	Trachyte		VOLCANIC ROCK	WR [5160]	62.66	1.26		14.61					5.49	1.72	1.27	0.22		3.58	5.35	0.35	1.56				0.14								0.02				119192
Atlantic	Canary Islands	Gran Canaria / Tejeda Caldera / Mogan Formation	Georoc 2020	[5160]	28	28	-15.6	-15.6	s_9	Trachybasalt		VOLCANIC ROCK	WR [5160]	38.42	13.98		0.63					18.03	13.01	11.51	1.38		0.1	1.14																		119193
Atlantic	Canary Islands	Gran Canaria / Tejeda Caldera / Mogan Formation	Georoc 2020	[5160]	28	28	-15.6	-15.6	s_10	Trachybasalt		VOLCANIC ROCK	WR [5160]	56.98	2.94		14.61					7.04	3.56	1.49	0.28		3.86	6.86																		119194
Atlantic	Canary Islands	Gran Canaria / Tejeda Caldera / Mogan Formation	Georoc 2020	[5160]	28	28	-15.6	-15.6	s_11	Comendite		VOLCANIC ROCK	WR [5160]	68.81	0.61		12.96					3.97	0.32	0.4	0.19		4.83	5	0.05	0.82				0.13								0.02				119195
Atlantic	Canary Islands	Gran Canaria / Tejeda Caldera / Mogan Formation	Georoc 2020	[5160]	28	28	-15.6	-15.6	s_12	Not Given		VOLCANIC ROCK	WR [5160]	65.36	1.04		13.4					4.84	1.7	0.82	0.2		4.11	5.79	0.25	0.47				0.03								0.33				119196
Atlantic	Canary Islands	Gran Canaria / Tejeda Caldera / Mogan Formation	Georoc 2020	[5160]	28	28	-15.6	-15.6	s_13	Trachyte		VOLCANIC ROCK	WR [5160]	64.86	1.24		14.31					5.42	1.3	1.16	0.21		3.53	5.45	0.36	1.23				0.05								0				119197
Atlantic	Canary Islands	Tenerife / Las Canadas Caldera / Bandas Del Sur Formation	Georoc 2020	[5457]	28.3	28.3	-16.6	-16.6	s_59	Phonolite		VOLCANIC ROCK	WR [5457]	59.28	1.15		19.38					3.45	2.06	0.96	0.21		4.55	8.37	0.2																0.88	124303
Atlantic	Canary Islands	Tenerife / Las Canadas Caldera / Bandas Del Sur Formation	Georoc 2020	[5457]	28.3	28.3	-16.6	-16.6	s_119	Basalt, Alkaline		VOLCANIC ROCK	WR [5457]	47.34	3.26		16.75					10.3	8.89	3.98	0.21		1.95	4.83	1.34																0.78	124305
Atlantic	Canary Islands	Tenerife / Las Canadas Caldera / Bandas Del Sur Formation	Georoc 2020	[5457]	28.3	28.3	-16.6	-16.6	s_134	Phonolite		VOLCANIC ROCK	WR [5457]	43.03	3.59		12.72					12.66	10.62	9.62	0.19		0.82	4.45	0.91																-0.18	124306
Atlantic	Canary Islands	Tenerife / Las Canadas Caldera / Bandas Del Sur Formation	Georoc 2020	[5457]	28.3	28.3	-16.6	-16.6	s_18E	Phonolite		VOLCANIC ROCK	WR [5457]	62.82	0.84		20.47					3.46	0.81	1.01	0.21		5.21	4.73	0.07																10.39	124307
Atlantic	Canary Islands	Tenerife / Las Canadas Caldera / Bandas Del Sur Formation	Georoc 2020	[5457]	28.3	28.3	-16.6	-16.6	s_43	Phonolite		VOLCANIC ROCK	WR [5457]	61.35	0.61		18.06					2.7	2.37	2.03	0.22		5.57	6.71	0.09																9.07	124310
Atlantic	Canary Islands	Tenerife / Las Canadas Caldera / Bandas Del Sur Formation-Abades Ignimbrite	Georoc 2020	[5457]	28.3	28.3	-16.6	-16.6	s_120MS	Phonolite		VOLCANIC ROCK	WR [5457]	56.2	1.64		19.07					5.24	3.99	1.91	0.2		3.78	6.99	0.4																2.64	124311
Atlantic	Canary Islands	Tenerife / Las Canadas Caldera / Bandas Del Sur Formation-Granadilla Ignimbrite	Georoc 2020	[5457]	28.3	28.3	-16.6	-16.6	s_UNIT1	Phonolite		VOLCANIC ROCK	WR [5457]	61.1	0.57		19.66					3.03	0.82	0.64	0.25		6.01	7.52	0.06																7.22	124312
Atlantic	Canary Islands	Tenerife / Las Canadas Caldera / Bandas Del Sur Formation-Granadilla Ignimbrite	Georoc 2020	[5457]	28.3	28.3	-16.6	-16.6	s_UNIT3	Phonolite		VOLCANIC ROCK	WR [5457]	61	0.51		19.98					3.09	0.72	0.56	0.27		5.98	7.51	0.04																8.26	124313
Atlantic	Canary Islands	Tenerife / Las Canadas Caldera / Bandas Del Sur Formation-Granadilla Ignimbrite	Georoc 2020	[5457]	28.3	28.3	-16.6	-16.6	s_UNIT4	Phonolite		VOLCANIC ROCK	WR [5457]	61.17	0.54		19.73					3.01	0.72	0.7	0.25		6.67	6.83	0.04																7.55	124314
Atlantic	Canary Islands	Tenerife / Las Canadas Caldera / Bandas Del Sur Formation-Granadilla Ignimbrite	Georoc 2020	[5457]	28.3	28.3	-16.6	-16.6	s_UNIT5	Phonolite		VOLCANIC ROCK	WR [5457]	61.15	0.69		19.46					3.01	1.26	0.72	0.21		5.82	7.26	0.06																11.62	124315
Atlantic	Canary Islands	Tenerife / Las Canadas Caldera / Bandas Del Sur Formation	Georoc 2020	[5457]	28.3	28.3	-16.6	-16.6	s_93LMB	Phonolite		VOLCANIC ROCK	WR [5457]	56.98	1.39		19.28					4.18	3.51	1.22	0.15		4.94	7.55	0.32																1.47	124318
Atlantic	Canary Islands	Tenerife / Las Canadas Caldera / Bandas Del Sur Formation	Georoc 2020	[5457]	28.3	28.3	-16.6	-16.6	s_36	Phonolite		VOLCANIC ROCK	WR [5457]	56.9	0.58		19.16					2.57	2.75	1.9	0.14		6.24	9.35	0.13																8.43	124319
Atlantic	Canary Islands	Tenerife / Las Canadas Caldera / Diego Hernandez Formation	Georoc 2020	[5600]	28	28.25	-16.25	-16.75	s_TF99-60	Phonolite	Poorly Phyric [5600]	VOLCANIC ROCK	WR [5600]	59.6	0.47		20.42					2.51	1.22	0.65	0.19		6.44	8.43	0.08																	124392
Atlantic	Canary Islands	Tenerife / Las Canadas Caldera / Diego Hernandez Formation	Georoc 2020	[5600]	28	28.25	-16.25	-16.75	s_TF99-61	Phonolite	Poorly Phyric [5600]	VOLCANIC ROCK	WR [5600]	59.65	0.43		20.2					2.4	1.52	0.69	0.19		6.32	8.53	0.07																	124393
Atlantic	Canary Islands	Tenerife / Las Canadas Caldera / Diego Hernandez Formation	Georoc 2020	[5600]	28	28.25	-16.25	-16.75	s_DH99-63	Phonolite	Poorly Phyric [5600]	VOLCANIC ROCK	WR [5600]	59.95	0.55		20.69					2.49	1.16	0.38	0.19		6.03	8.48	0.08																	124394
Atlantic	Canary Islands	Tenerife / Las Canadas Caldera / Diego Hernandez Formation	Georoc 2020	[5600]	28	28.25	-16.25	-16.75	s_TF99-59	Phonolite	Poorly Phyric [5600]	VOLCANIC ROCK	WR [5600]	57.93	0.46		19.6					2.49	3.87	1.02	0.18		6.22	8.13	0.1																	124395
Atlantic	Canary Islands	Tenerife / Las Canadas Caldera / Diego Hernandez Formation	Georoc 2020	[5600]	28	28.25	-16.25	-16.75	s_TF00-16	Phonolite		VOLCANIC ROCK	WR [5600]	60.14	0.44		20.46					2.42	0.86	0.34	0.19		6.05	9.06	0.05																	124397
Atlantic	Canary Islands	Tenerife / Las Canadas Caldera / Diego Hernandez Formation	Georoc 2020	[5600]	28	28.25	-16.25	-16.75	s_TF99-27	Phonolite		VOLCANIC ROCK	WR [5600]	57.75	0.8		20.12					3.24	3.11	0.78	0.18		5.46	8.41	0.15																	124398
Atlantic	Canary Islands	Tenerife / Las Canadas Caldera / Diego Hernandez Formation	Georoc 2020	[5600]	28	28.25	-16.25	-16.75	s_DH99-66	Phonolite		VOLCANIC ROCK	WR [5600]	59.5	0.59		20.64					2.49	1.29	0.37	0.19		5.96	8.86	0.1																	124399
Atlantic	Canary Islands	Tenerife / Las Canadas Caldera / Diego Hernandez Formation	Georoc 2020	[5600]	28	28.25	-16.25	-16.75	s_TF99-28	Phonolite		VOLCANIC ROCK	WR [5600]	59.73	0.45		20.7					2.32	1.09	0.44	0.19		6.11	8.93	0.05																	124400
Atlantic	Canary Islands	Tenerife / Las Canadas Caldera / Diego Hernandez Formation	Georoc 2020	[5600]	28	28.25	-16.25	-16.75	s_TF00-40	Phonolite		VOLCANIC ROCK	WR [5600]	58.17	0.43		20.01					2.48	3.81	0.56	0.18		5.57	8.73	0.06																	124401
Atlantic	Canary Islands	Tenerife / Las Canadas Caldera / Diego Hernandez Formation	Georoc 2020	[5600]	28	28.25	-16.25	-16.75	s_TF00-47	Phonolite		VOLCANIC ROCK	WR [5600]	55.79	0.42		19.31					2.35	7.16	0.54	0.18		5.7	8.48	0.06																	124402
Atlantic	Canary Islands	Tenerife / Las Canadas Caldera / Diego Hernandez Formation	Georoc 2020	[5600]	28	28.25	-16.25	-16.75	s_TF00-49	Phonolite		VOLCANIC ROCK	WR [5600]	58.58	0.7		19.99					2.91	2.83	0.82	0.18		5.4	8.44	0.14																	124404
Atlantic	Canary Islands	Tenerife / Las Canadas Caldera / Diego Hernandez Formation	Georoc 2020	[5600]	28	28.25	-16.25	-16.75	s_TF00-56	Phonolite		VOLCANIC ROCK	WR [5600]	58.09	0.4		20.7					2.44	3.12	0.48	0.18		5.58	8.97	0.04																	124405
Atlantic	Canary Islands	Tenerife / Las Canadas Caldera / Diego Hernandez Formation	Georoc 2020	[5600]	28	28.25	-16.25	-16.75	s_TF00-62	Phonolite		VOLCANIC ROCK	WR [5600]	58.67	0.44		20.05					2.44	2.05	0.4	0.19		5.92	9.79	0.05																	124406
Atlantic	Canary Islands	Tenerife / Las Canadas Caldera / Diego Hernandez Formation	Georoc 2020	[5600]	28	28.25	-16.25	-16.75	s_TF00-64	Phonolite		VOLCANIC ROCK	WR [5600]	59.52	0.43		20.53					2.49	1.24	0.47	0.19		5.99	9.1	0.05																	124407
Atlantic	Canary Islands	Tenerife / Las Canadas Caldera / Diego Hernandez Formation	Georoc 2020	[5600]	28	28.25	-16.25	-16.75	s_TF99-58	Phonolite		VOLCANIC ROCK	WR [5600]	56.89	0.82		19.48					3.27	4.74	1.08	0.18		5.84	7.49	0.2																	124408
Atlantic	Canary Islands	Tenerife / Las Canadas Caldera / Diego Hernandez Formation	Georoc 2020	[5600]	28	28.25	-16.25	-16.75	s_TF00-39	Phonolite		VOLCANIC ROCK	WR [5600]	59.82	0.88		19.5					2.96	2.3	0.59	0.15		5.56	8.12	0.13																	124409
Atlantic	Canary Islands	Tenerife / Las Canadas Caldera / Diego Hernandez Formation	Georoc 2020	[5600]	28	28.25	-16.25	-16.75	s_TF00-21	Phonolite		VOLCANIC ROCK	WR [5600]	61.05	0.84		19.62					2.78	1.51	0.51	0.14		6.01	7.44	0.11																	124410
Atlantic	Canary Islands	Tenerife / Las Canadas Caldera / Diego Hernandez Formation	Georoc 2020	[5600]	28	28.25	-16.25	-16.75	s_CE337-1	Phonolite		VOLCANIC ROCK	WR [5600]	55.74	1.04		18.6					3.29	7.23	1.17	0.15		5.25	7.29	0.24																	124411
Atlantic	Canary Islands	Tenerife / Las Canadas Caldera / Diego Hernandez Formation	Georoc 2020	[5600]	28	28.25	-16.25	-16.75	s_TF99-57P	Phonolite		VOLCANIC ROCK	WR [5600]	58.34	1.36		19.1					4	3.21	1.2	0.16		5.41	6.91	0.29																	124412
Atlantic	Canary Islands	Tenerife / Las Canadas Caldera / Diego Hernandez Formation	Georoc 2020	[5600]	28	28.25	-16.25	-16.75	s_TF00-41T	Phonolite		VOLCANIC ROCK	WR [5600]	59.55	1		19.56					3.23	2.33	0.93	0.15		5.3	7.73	0.22																	124413
Atlantic	Canary Islands	Tenerife / Las Canadas Caldera / Diego Hernandez Formation	Georoc 2020	[5600]	28	28.25	-16.25	-16.75	s_TF00-41B	Phonolite		VOLCANIC ROCK	WR [5600]	59.48	1		19.52					3.28	2.32	0.91	0.15		5.28	7.85	0.22																	124414
Atlantic	Canary Islands	Tenerife / Las Canadas Caldera / Diego Hernandez Formation	Georoc 2020	[5600]	28	28.25	-16.25	-16.75	s_TF00-42	Phonolite		VOLCANIC ROCK	WR [5600]	56.38	1.6		19.06					4.69	4.15	1.56	0.16		4.6	7.35	0.44																	124415
Atlantic	Canary Islands	Tenerife / Las Canadas Caldera / Diego Hernandez Formation	Georoc 2020	[5600]	28	28.25	-16.25	-16.75	s_TF00-52	Phonolite		VOLCANIC ROCK	WR [5600]	58.72	1.12		19.53					3.6	2.6	0.94	0.16		5.18	7.91	0.25																	124416
Atlantic	Canary Islands	Tenerife / Las Canadas Caldera / Diego Hernandez Formation	Georoc 2020	[5600]	28	28.25	-16.25	-16.75	s_TF99-47M	Phonolite		VOLCANIC ROCK	WR [5600]	54.08	2.13		18.53					6.05	5.59	2.33	0.18		3.94	6.51	0.65																	124417
Atlantic	Canary Islands	Tenerife / Las Canadas Caldera / Diego Hernandez Formation	Georoc 2020	[5600]	28	28.25	-16.25	-16.75	s_TF00-51	Phonolite		VOLCANIC ROCK	WR [5600]	54.42	2.04		18.71					5.89	5.2	2.14	0.18		4.03	6.79	0.61																	124418
Atlantic	Canary Islands	Tenerife / Las Canadas Caldera / Diego Hernandez Formation	Georoc 2020	[5600]	28	28.25	-16.25	-16.75	s_TF00-20	Phonolite		VOLCANIC ROCK	WR [5600]	55.64	1.84		19.2					5.57	4.56	1.94	0.18		3.97	6.63	0.47																	124419
Atlantic	Canary Islands	Tenerife / Las Canadas Caldera / Diego Hernandez Formation	Georoc 2020	[5600]	28	28.25	-16.25	-16.75	s_TF00-18	Phonolite		VOLCANIC ROCK	WR [5600]	59.77	1.05		19.45					3.42	2.22	0.87	0.15		5.5	7.37	0.2																	124420
Atlantic	Canary Islands	Tenerife / Las Canadas Caldera / Diego Hernandez Formation	Georoc 2020	[5600]	28	28.25	-16.25	-16.75	s_TF00-19A	Phonolite		VOLCANIC ROCK	WR [5600]	56.83	1.51		19.12					4.79	3.78	1.62	0.18		4.58	7.22	0.37																	124421
Atlantic	Canary Islands	Tenerife / Las Canadas Caldera / Diego Hernandez Formation	Georoc 2020	[5600]	28	28.25	-16.25	-16.75	s_TF00-19B	Phonolite		VOLCANIC ROCK	WR [5600]	56.39	1.53		19.16					4.95	3.9	1.69	0.18		4.48	7.33	0.4																	124422
Atlantic	Canary Islands	Tenerife / Las Canadas Caldera / Diego Hernandez Formation	Georoc 2020	[5600]	28	28.25	-16.25	-16.75	s_CE29-5	Phonolite		VOLCANIC ROCK	WR [5600]	56.19	1.6		19.12					4.76	3.89	1.6	0.17		4.6	7.62	0.44																	124423
Atlantic	Canary Islands	Tenerife / Las Canadas Caldera / Diego Hernandez Formation	Georoc 2020	[5600]	28	28.25	-16.25	-16.75	s_CE319-1	Phonolite		VOLCANIC ROCK	WR [5600]	56.16	1.57		19.26					4.9	3.91	1.81	0.18		4.5	7.33	0.39																	124425
Atlantic	Canary Islands	Tenerife / Las Canadas Caldera / Diego Hernandez Formation	Georoc 2020	[5600]	28	28.25	-16.25	-16.75	s_TF99-57M	Phonolite		VOLCANIC ROCK	WR [5600]	49.31	3.11		17.59					8.59	8.29	4.02	0.21		2.83	5.05	1																	124426
Atlantic	Canary Islands	Tenerife / Las Canadas Caldera / Diego Hernandez Formation	Georoc 2020	[5600]	28	28.25	-16.25	-16.75	s_TF00-110M	Phonolite		VOLCANIC ROCK	WR [5600]	48.67	3.17		17.69					8.62	8.54	3.84	0.2		2.67	5.47	1.13																	124427
Atlantic	Canary Islands	Lanzarote / Tao / Timanfaya Eruption	Georoc 2020	[22296]	29.03	29.03	-13.63	-13.63	s_TAO	Not Given		VOLCANIC ROCK	WR [22296]	43.9	2.63		11.6					10.98	11	13.4	0.18		1.18	3.28	0.94																	128973-TAO
Atlantic	Canary Islands	Gran Canaria	Georoc 2020	[4752]	28.6502	28.6502	-15.1445	-15.1445	s_157-953C-73R-4,25-18	Basalt		VOLCANIC ROCK	WR [4752]	44.23	2.78		11.41					11.04	6.79	9.22	0.18		1.13	4	0.38																6.6	131636
Atlantic	Canary Islands	Gran Canaria	Georoc 2020	[4752]	28.6502	28.6502	-15.1445	-15.1445	s_157-953C-82R-1,42-44	Basalt		VOLCANIC ROCK	WR [4752]	41.55	3.9		8.95					12.54	8.83	13.13	0.18		0.4	2.82	0.51																5.27	131637
Atlantic	Canary Islands	Gran Canaria	Georoc 2020	[4752]	28.6502	28.6502	-15.1445	-15.1445	s_157-953C-83R-3,13-24	Basalt		VOLCANIC ROCK	WR [4752]	43.61	3.28		10.05					10.83	5.23	13.22	0.19		1.18	3.5	0.43																6.71	131638
Atlantic	Canary Islands	Gran Canaria	Georoc 2020	[4752]	28.6502	28.6502	-15.1445	-15.1445	s_157-953C-83R-3,94-108	Basalt		VOLCANIC ROCK	WR [4752]	43.64	3.25		9.77					10.85	5.36	13.81	0.16		0.96	3.5	0.43																6.49	131639
Atlantic	Canary Islands	Gran Canaria	Georoc 2020	[4752]	28.6502	28.6502	-15.1445	-15.1445	s_157-953C-83R-4,41-45	Basalt		VOLCANIC ROCK	WR [4752]	43.03	3.06		9.36					11.36	5.3	14.84	0.17		0.53	2.96	0.4																6.55	131640
Atlantic	Canary Islands	Gran Canaria	Georoc 2020	[4752]	28.6502	28.6502	-15.1445	-15.1445	s_157-953C-83R-5,0-23	Basalt		VOLCANIC ROCK	WR [4752]	43.7	2.83		8.78					11.54	5.34	16.95	0.17		0.21	2.83	0.37																4.93	131641
Atlantic	Canary Islands	Gran Canaria	Georoc 2020	[4752]	28.6502	28.6502	-15.1445	-15.1445	s_157-953C-83R-4,119-121	Basalt		VOLCANIC ROCK	WR [4752]	43.13	2.88		8.72					11.33	6.67	14.81	0.17		0.37	2.4	0.39																6.83	131642
Atlantic	Canary Islands	Gran Canaria	Georoc 2020	[4752]	28.6502	28.6502	-15.1445	-15.1445	s_157-953C-83R-6,107-120	Basalt		VOLCANIC ROCK	WR [4752]	42.83	3.41		9.98					11.63	7.51	10.32	0.18		1.29	3.36	0.44																6.6	131643
Atlantic	Canary Islands	Gran Canaria	Georoc 2020	[4752]	28.6502	28.6502	-15.1445	-15.1445	s_157-953C-84R-4,24-42	Basalt		VOLCANIC ROCK	WR [4752]	44.1	2.95		8.57					11.55	7.82	13.76	0.17		0.76	2.57	0.39																5.88	131644
Atlantic	Canary Islands	Gran Canaria	Georoc 2020	[4752]	28.6502	28.6502	-15.1445	-15.1445	s_157-953C-84R-6,88-104	Basalt		VOLCANIC ROCK	WR [4752]	43.47	3.37		9.76					11.18	8.23	10.09	0.17		1.23	3.4	0.41																6.2	131645
Atlantic	Canary Islands	Gran Canaria	Georoc 2020	[4752]	28.6502	28.6502	-15.1445	-15.1445	s_157-953C-84R-7,47-50	Basalt		VOLCANIC ROCK	WR [4752]	42.94	3.36		9.51					11.63	7.73	10.77	0.18		0.86	3.1	0.44																8.06	131646
Atlantic	Canary Islands	Gran Canaria	Georoc 2020	[4752]	28.6502	28.6502	-15.1445	-15.1445	s_157-953C-84R-8,27-44	Basalt		VOLCANIC ROCK	WR [4752]	43.23	3.36		9.52					11.12	7.77	11.42	0.17		1.11	3.12	0.45																6.38	131647
Atlantic	Canary Islands	Gran Canaria	Georoc 2020	[4752]	28.6502	28.6502	-15.1445	-15.1445	s_157-953C-85R-5,8-12	Basalt		VOLCANIC ROCK	WR [4752]	43.01	3.36		7.46					12.86	7.47	15.04	0.21		0.21	2.44	0.44																5.09	131648
Atlantic	Canary Islands	Gran Canaria	Georoc 2020	[4752]	28.6502	28.6502	-15.1445	-15.1445	s_157-953C-85R-1,89-107	Basalt		VOLCANIC ROCK	WR [4752]	43.4	3.14		9.23					12	6.94	13.67	0.2		0.58	3.15	0.42																4.93	131649
Atlantic	Canary Islands	Gran Canaria	Georoc 2020	[4752]	28.6502	28.6502	-15.1445	-15.1445	s_157-953C-89R-1,61-64	Basalt		VOLCANIC ROCK	WR [4752]	43.31	2.85		8.47					11.54	7.88	15	0.17		0.56	2.06	0.38																6.5	131651
Atlantic	Canary Islands	Gran Canaria	Georoc 2020	[4752]	28.6502	28.6502	-15.1445	-15.1445	s_157-953C-89R-1,126-142	Basalt		VOLCANIC ROCK	WR [4752]	43.34	2.9		8.83					11.69	7.9	14.47	0.17		0.6	2.48	0.37																5.38	131652
Atlantic	Canary Islands	Gran Canaria	Georoc 2020	[4752]	28.6502	28.6502	-15.1445	-15.1445	s_157-953C-89R-4,0-18	Basalt		VOLCANIC ROCK	WR [4752]	43.26	3.06		8.5					11.96	7.97	15.29	0.18		0.43	2.45	0.4																5.35	131653
Atlantic	Canary Islands	Gran Canaria	Georoc 2020	[4752]	28.6502	28.6502	-15.1445	-15.1445	s_157-953C-90R-2,0-15	Basalt		VOLCANIC ROCK	WR [4752]	43.36	2.92		8.47					11.45	7.77	14.98	0.17		0.54	2.59	0.38																4.87	131655
Atlantic	Canary Islands	Gran Canaria	Georoc 2020	[4752]	28.6502	28.6502	-15.1445	-15.1445	s_157-953C-90R-3,0-16	Basalt		VOLCANIC ROCK	WR [4752]	43.67	2.9		8.77					11.28	7.72	15.01	0.17		0.61	2.66	0.39																5.27	131656
Atlantic	Canary Islands	Gran Canaria	Georoc 2020	[4752]	28.6502	28.6502	-15.1445	-15.1445	s_157-953C-90R-4,130-132	Basalt		VOLCANIC ROCK	WR [4752]	43.99	2.69		7.63					12.03	7.82	15.53	0.18		0.52	2.04	0.35																4.71	131657
Atlantic	Canary Islands	Gran Canaria	Georoc 2020	[4752]	28.6502	28.6502	-15.1445	-15.1445	s_157-953C-91R-2,90-100	Basalt		VOLCANIC ROCK	WR [4752]	43.04	2.98		8.65					11.4	7.76	14.75	0.17		0.6	2.39	0.4																5.83	131658
Atlantic	Canary Islands	Gran Canaria	Georoc 2020	[4752]	28.6502	28.6502	-15.1445	-15.1445	s_157-953C-91R-4,13-24	Basalt		VOLCANIC ROCK	WR [4752]	43.75	2.96		8.61					11.24	7.96	14.55	0.17		0.78	2.44	0.39																5.98	131659
Atlantic	Canary Islands	Gran Canaria	Georoc 2020	[4752]	28.6502	28.6502	-15.1445	-15.1445	s_157-953C-92R-1,57-70	Basalt		VOLCANIC ROCK	WR [4752]	43.31	3.01		8.49					11.45	7.99	14.79	0.17		0.62	2.35	0.39																5.55	131660
Atlantic	Canary Islands	Gran Canaria	Georoc 2020	[4752]	28.6502	28.6502	-15.1445	-15.1445	s_157-953C-93R-4,20-24	Basalt		VOLCANIC ROCK	WR [4752]	45.54	3.3		9.38					12.05	8.96	14.08	0.18		0.63	1.97	0.44																1.54	131661
Atlantic	Canary Islands	Gran Canaria	Georoc 2020	[4752]	28.6502	28.6502	-15.1445	-15.1445	s_157-953C-94R-3,125-146	Basalt		VOLCANIC ROCK	WR [4752]	42.92	3.15		8.61					11.2	8.09	13.76	0.16		0.87	2.28	0.43																5.84	131662
Atlantic	Canary Islands	Gran Canaria	Georoc 2020	[4752]	28.6502	28.6502	-15.1445	-15.1445	s_157-953C-95R-3,128-150	Basalt		VOLCANIC ROCK	WR [4752]	43.17	3.1		9					11.36	8.24	13.53	0.17		0.81	2.75	0.44																5.36	131663
Atlantic	Canary Islands	Gran Canaria	Georoc 2020	[4752]	28.6502	28.6502	-15.1445	-15.1445	s_157-953C-96R-1,51-69	Basalt		VOLCANIC ROCK	WR [4752]	42.96	3.36		9.34					11.55	8.04	12.65	0.17		0.86	2.96	0.49																5.46	131664
Atlantic	Canary Islands	Gran Canaria	Georoc 2020	[4752]	28.6502	28.6502	-15.1445	-15.1445	s_157-953C-96R-4,118-139	Basalt		VOLCANIC ROCK	WR [4752]	43.21	3.29		9.46					10.93	8.34	11.29	0.17		1.25	2.95	0.47																6.59	131665
Atlantic	Canary Islands	Gran Canaria	Georoc 2020	[4752]	28.6502	28.6502	-15.1445	-15.1445	s_157-953C-96R-6,20-32	Basalt		VOLCANIC ROCK	WR [4752]	43.05	3.24		9.18					11.06	8.32	12.5	0.17		1.16	2.5	0.46																5.7	131666
Atlantic	Canary Islands	Gran Canaria	Georoc 2020	[4752]	28.6502	28.6502	-15.1445	-15.1445	s_157-953C-97R-4,50-53	Basalt		VOLCANIC ROCK	WR [4752]	42.78	3.31		8.84					11.43	8.1	13.19	0.17		0.81	2.39	0.48																6.99	131668
Atlantic	Canary Islands	Gran Canaria	Georoc 2020	[4752]	28.6502	28.6502	-15.1445	-15.1445	s_157-953C-98R-2,62-64	Basalt		VOLCANIC ROCK	WR [4752]	42.85	3.25		8.65					11.31	8.05	13.75	0.17		0.82	2.13	0.45																6.86	131670
Atlantic	Canary Islands	Gran Canaria	Georoc 2020	[4752]	28.6502	28.6502	-15.1445	-15.1445	s_157-953C-98R-6,140-147	Basalt		VOLCANIC ROCK	WR [4752]	43.79	3.13		9.24					12.17	9.21	13.79	0.19		0.63	1.81	0.42																4.17	131671
Atlantic	Canary Islands	Gran Canaria	Georoc 2020	[4752]	28.6502	28.6502	-15.1445	-15.1445	s_157-953C-100R-4,0-15	Basalt		VOLCANIC ROCK	WR [4752]	43.28	3.4		9.02					11.18	8.56	13.15	0.17		0.91	2.47	0.47																5.19	131672
Atlantic	Canary Islands	Gran Canaria	Georoc 2020	[4752]	28.6502	28.6502	-15.1445	-15.1445	s_157-953C-100R-4,145-148	Basalt		VOLCANIC ROCK	WR [4752]	41.82	4.11		11.78					10.41	8.94	9.27	0.19		0.93	3.85	0.73																6.23	131673
Atlantic	Canary Islands	Gran Canaria	Georoc 2020	[4752]	28.6502	28.6502	-15.1445	-15.1445	s_157-953C-101R-4,1-13	Basalt		VOLCANIC ROCK	WR [4752]	43.53	3.27		8.82					10.81	7.77	13.56	0.16		1.08	2.32	0.47																6.59	131674
Atlantic	Canary Islands	Gran Canaria	Georoc 2020	[4752]	28.6502	28.6502	-15.1445	-15.1445	s_157-953C-101R-5,78-80	Basalt		VOLCANIC ROCK	WR [4752]	43.73	4.04		8.89					12.83	9.51	11.42	0.19		0.99	2.18	0.48																3.82	131675
Atlantic	Canary Islands	Gran Canaria	Georoc 2020	[4752]	28.6502	28.6502	-15.1445	-15.1445	s_157-953C-102R-2,80-90	Basalt		VOLCANIC ROCK	WR [4752]	42.73	3.91		9.7					10.94	8.59	11.41	0.17		1.11	2.6	0.56																6.49	131677
Atlantic	Canary Islands	Gran Canaria	Georoc 2020	[4752]	28.6502	28.6502	-15.1445	-15.1445	s_157-953C-103R-2,42-52	Basalt		VOLCANIC ROCK	WR [4752]	42.83	3.71		8.81					11.97	8.16	12.83	0.18		0.81	2.29	0.54																5.63	131678
Atlantic	Canary Islands	Gran Canaria	Georoc 2020	[4752]	28.6502	28.6502	-15.1445	-15.1445	s_157-953C-103R-4,114-127	Basalt		VOLCANIC ROCK	WR [4752]	42.71	3.62		8.88					11.33	8.46	12.35	0.17		1.02	2.35	0.52																6.14	131679
Atlantic	Canary Islands	Gran Canaria	Georoc 2020	[4752]	28.6502	28.6502	-15.1445	-15.1445	s_157-953C-103R-6,67-70	Basalt		VOLCANIC ROCK	WR [4752]	42.57	3.56		9.16					11.34	8.38	12.03	0.17		0.87	2.5	0.54																6.85	131680
Atlantic	Canary Islands	Gran Canaria	Georoc 2020	[4752]	28.6502	28.6502	-15.1445	-15.1445	s_157-953C-103R-6,116-126	Basalt		VOLCANIC ROCK	WR [4752]	42.73	3.59		8.88					11.38	8.18	12.04	0.17		0.75	2.78	0.54																6	131681
Atlantic	Canary Islands	Gran Canaria	Georoc 2020	[4752]	28.6502	28.6502	-15.1445	-15.1445	s_157-953C-101R-3,8-22	Basalt		VOLCANIC ROCK	WR [4752]	42.95	3.3		9.01					11.22	7.93	13.06	0.15		1.01	2.32	0.46																6.85	131682
Atlantic	Canary Islands	Gran Canaria	Georoc 2020	[4752]	28.6502	28.6502	-15.1445	-15.1445	s_157-953C-90R-5,0-8	Basalt		VOLCANIC ROCK	WR [4752]	45.11	3.79		9.6					12.37	9.76	13.02	0.19		1.06	1.93	0.56																1.06	131683
Atlantic	Canary Islands	Gran Canaria	Georoc 2020	[4752]	28.6502	28.6502	-15.1445	-15.1445	s_157-953C-90R-5,49-55	Basalt		VOLCANIC ROCK	WR [4752]	44.58	3.45		9.72					12.16	9.61	13.82	0.18		0.77	1.87	0.48																1.97	131684
Atlantic	Canary Islands	Gran Canaria	Georoc 2020	[4752]	28.6502	28.6502	-15.1445	-15.1445	s_157-953C-93R-2,8-24	Basalt		VOLCANIC ROCK	WR [4752]	44.38	3.43		10.23					10.77	9.91	8.72	0.17		1.79	3.43	0.46																4.76	131685
Atlantic	Canary Islands	Gran Canaria	Georoc 2020	[4752]	28.6502	28.6502	-15.1445	-15.1445	s_157-953C-98R-6,34-45	Basalt		VOLCANIC ROCK	WR [4752]	41.81	3.57		9.48					12.54	10.25	13.08	0.19		0.49	1.36	0.46																4.57	131686
Atlantic	Canary Islands	Gran Canaria	Georoc 2020	[4752]	28.6502	28.6502	-15.1445	-15.1445	s_157-953C-101R-2,86-106	Basalt		VOLCANIC ROCK	WR [4752]	45.17	3.75		9.54					11.89	9.4	14.19	0.18		0.82	1.72	0.49																1.54	131687
Atlantic	Canary Islands	Gran Canaria	Georoc 2020	[4752]	28.4365	28.4365	-15.532	-15.532	s_157-954B-36R-1,7-12	Basalt		VOLCANIC ROCK	WR [4752]	45.24	4.75		11.73					10.19	12.05	6.53	0.17		1.49	2.36	0.69																3.05	131688
Atlantic	Canary Islands	Gran Canaria	Georoc 2020	[4752]	28.4365	28.4365	-15.532	-15.532	s_157-954B-37R-1,137-140	Basalt		VOLCANIC ROCK	WR [4752]	45.75	4.4		11.22					10.92	10.01	8.38	0.24		0.92	2.33	0.45																3.02	131689
Atlantic	Canary Islands	Gran Canaria	Georoc 2020	[4752]	28.4365	28.4365	-15.532	-15.532	s_157-954B-38R-1,15-16	Basalt		VOLCANIC ROCK	WR [4752]	42.84	5.49		10.61					12.92	10.29	8.55	0.17		1.34	2.14	0.76																1.97	131690
Atlantic	Canary Islands	Gran Canaria	Georoc 2020	[4752]	28.4365	28.4365	-15.532	-15.532	s_157-954B-35R-1,72-78	Basalt		VOLCANIC ROCK	WR [4752]	48.44	4.5		13.86					11.29	9.61	4.61	0.15		1.22	2.86	0.57																1.59	131691
Atlantic	Canary Islands	Gran Canaria	Georoc 2020	[4752]	28.4365	28.4365	-15.532	-15.532	s_157-954B-38R-3,64-67	Basalt		VOLCANIC ROCK	WR [4752]	44.17	5.1		11.92					12.24	9.79	7.14	0.18		1.33	2.05	0.71																4.15	131692
Atlantic	Canary Islands	Gran Canaria	Georoc 2020	[4752]	28.4365	28.4365	-15.532	-15.532	s_157-954B-39R-3,38-48	Basalt		VOLCANIC ROCK	WR [4752]	42.49	5.37		11.53					9.09	12.49	6.38	0.15		1.7	3	0.89																4.42	131693
Atlantic	Canary Islands	Gran Canaria	Georoc 2020	[4752]	27.6149	27.6149	-16.1633	-16.1633	s_157-956B-44R-3,0-10	Basalt		VOLCANIC ROCK	WR [4752]	44.9	3.52		11.78					11.32	4.6	10.05	0.16		1.54	3.73	0.45																5.59	131694
Atlantic	Canary Islands	Gran Canaria	Georoc 2020	[4752]	27.6149	27.6149	-16.1633	-16.1633	s_157-956B-45R-3,120-131	Basalt		VOLCANIC ROCK	WR [4752]	43.1	3.07		10.1					10.98	6.36	11.58	0.16		1.41	3.34	0.42																6.74	131695
Atlantic	Canary Islands	Gran Canaria	Georoc 2020	[4752]	27.6149	27.6149	-16.1633	-16.1633	s_157-956B-46R-1,117-130	Basalt		VOLCANIC ROCK	WR [4752]	43.6	3.18		10.3					11.07	7.7	12.09	0.17		1.06	2.61	0.49																5.59	131696
Atlantic	Canary Islands	Gran Canaria	Georoc 2020	[4752]	27.6149	27.6149	-16.1633	-16.1633	s_157-956B-46R-2,62-81	Basalt		VOLCANIC ROCK	WR [4752]	43.5	3.1		9.99					11.07	7.51	12.21	0.18		1.17	2.47	0.54																6.12	131697
Atlantic	Canary Islands	Gran Canaria	Georoc 2020	[4752]	27.6149	27.6149	-16.1633	-16.1633	s_157-956B-46R-3,25-37	Basalt		VOLCANIC ROCK	WR [4752]	44.3	3.27		10.4					11.16	7.22	11.62	0.17		1.39	2.59	0.52																5.1	131698
Atlantic	Canary Islands	Gran Canaria	Georoc 2020	[4752]	27.6149	27.6149	-16.1633	-16.1633	s_157-956B-47R-2,30-42	Basalt		VOLCANIC ROCK	WR [4752]	46.7	3.7		13.1					11.25	10.7	6.79	0.19		0.76	2.69	0.52																2.1	131699
Atlantic	Canary Islands	Gran Canaria	Georoc 2020	[4752]	27.6149	27.6149	-16.1633	-16.1633	s_157-956B-47R-2,142-148	Basalt		VOLCANIC ROCK	WR [4752]	45.7	4.36		12.65					12	10.41	7.09	0.18		0.98	2.69	0.53																1.98	131700
Atlantic	Canary Islands	Gran Canaria	Georoc 2020	[4752]	27.6149	27.6149	-16.1633	-16.1633	s_157-956B-49R-1,130-148	Basalt		VOLCANIC ROCK	WR [4752]	43.7	3.24		9.56					11.34	7.76	12.45	0.17		1.47	2.43	0.33																4.94	131701
Atlantic	Canary Islands	Gran Canaria	Georoc 2020	[4752]	27.6149	27.6149	-16.1633	-16.1633	s_157-956B-49R-3,54-63	Basalt		VOLCANIC ROCK	WR [4752]	43.1	3.3		9.58					11.34	7.26	12.45	0.16		1.29	2.62	0.35																6.1	131702
Atlantic	Canary Islands	Gran Canaria	Georoc 2020	[4752]	27.6149	27.6149	-16.1633	-16.1633	s_157-956B-50R-1,93-100	Basalt		VOLCANIC ROCK	WR [4752]	43.6	3.35		9.68					11.52	6.95	12.9	0.16		1.38	2.28	0.37																5.59	131703
Atlantic	Canary Islands	Gran Canaria	Georoc 2020	[4752]	27.6149	27.6149	-16.1633	-16.1633	s_157-956B-50R-2,27-40	Basalt		VOLCANIC ROCK	WR [4752]	43.3	3.3		9.49					11.43	7.2	13.15	0.16		1.13	2.24	0.38																5.8	131704
Atlantic	Canary Islands	Gran Canaria	Georoc 2020	[4752]	27.6149	27.6149	-16.1633	-16.1633	s_157-956B-50R-3,107-129	Basalt		VOLCANIC ROCK	WR [4752]	43.2	3.44		9.88					11.52	6.84	12.63	0.16		1.26	2.4	0.4																5.94	131705
Atlantic	Canary Islands	Gran Canaria	Georoc 2020	[4752]	27.6149	27.6149	-16.1633	-16.1633	s_157-956B-51R-1,0-26	Basalt		VOLCANIC ROCK	WR [4752]	43.5	3.47		9.91					11.7	6.88	13.02	0.17		1.12	2.29	0.39																6.13	131706
Atlantic	Canary Islands	Gran Canaria	Georoc 2020	[4752]	27.6149	27.6149	-16.1633	-16.1633	s_157-956B-51R-2,0-12	Basalt		VOLCANIC ROCK	WR [4752]	43.5	3.47		9.91					11.7	6.88	13.02	0.17		1.12	2.29	0.39																5.61	131707
Atlantic	Canary Islands	Gran Canaria	Georoc 2020	[4752]	27.6149	27.6149	-16.1633	-16.1633	s_157-956B-51R-3,97-123	Basalt		VOLCANIC ROCK	WR [4752]	44	3.52		10					11.61	7.14	12.62	0.17		1.22	2.38	0.4																5.25	131708
Atlantic	Canary Islands	Gran Canaria	Georoc 2020	[4752]	27.6149	27.6149	-16.1633	-16.1633	s_157-956B-51R-4,126-145	Basalt		VOLCANIC ROCK	WR [4752]	43.1	3.49		9.84					11.34	7.86	11.93	0.16		1.29	2.38	0.42																5.75	131709
Atlantic	Canary Islands	Gran Canaria	Georoc 2020	[4752]	27.6149	27.6149	-16.1633	-16.1633	s_157-956B-51R-5,76-89	Basalt		VOLCANIC ROCK	WR [4752]	44	3.58		10.2					11.25	7.63	11.47	0.17		1.39	2.44	0.46																5.11	131710
Atlantic	Canary Islands	Gran Canaria	Georoc 2020	[4752]	27.6149	27.6149	-16.1633	-16.1633	s_157-956B-52R-4,107-120	Basalt		VOLCANIC ROCK	WR [4752]	45	3.4		9.94					11.7	7.36	13.18	0.17		0.95	2.1	0.38																4.48	131711
Atlantic	Canary Islands	Gran Canaria	Georoc 2020	[4752]	27.6149	27.6149	-16.1633	-16.1633	s_157-956B-53R-1,80-96	Basalt		VOLCANIC ROCK	WR [4752]	44.3	3.52		10.1					11.52	7.57	11.86	0.16		1.25	2.41	0.4																4.98	131712
Atlantic	Canary Islands	Gran Canaria	Georoc 2020	[4752]	27.6149	27.6149	-16.1633	-16.1633	s_157-956B-53R-2,18-24	Basalt		VOLCANIC ROCK	WR [4752]	44.7	3.24		8.76					12.15	9	13.27	0.15		0.62	1.78	0.33																3.97	131713
Atlantic	Canary Islands	Gran Canaria	Georoc 2020	[4752]	27.6149	27.6149	-16.1633	-16.1633	s_157-956B-54R-2,0-75	Basalt		VOLCANIC ROCK	WR [4752]	47	3.62		13.5					10.48	9.14	6.92	0.16		1.3	2.97	0.56																3.04	131714
Atlantic	Canary Islands	Gran Canaria	Georoc 2020	[4752]	27.6149	27.6149	-16.1633	-16.1633	s_157-956B-54R-2,8-65	Basalt		VOLCANIC ROCK	WR [4752]	45.5	3.6		8.64					12.24	11.1	11.88	0.16		0.67	1.65	0.38																2.4	131715
Atlantic	Canary Islands	Gran Canaria	Georoc 2020	[4752]	27.6149	27.6149	-16.1633	-16.1633	s_157-956B-55R-3,34-44	Basalt		VOLCANIC ROCK	WR [4752]	45.7	2.92		8.46					11.07	12.2	11.98	0.2		0.49	1.51	0.28																3.14	131716
Atlantic	Canary Islands	Gran Canaria	Georoc 2020	[4752]	27.6149	27.6149	-16.1633	-16.1633	s_157-956B-55R-3,84-96	Basalt		VOLCANIC ROCK	WR [4752]	43.2	3.36		9.97					12.33	8.06	11.71	0.16		1.25	2.15	0.48																4.85	131717
Atlantic	Canary Islands	Gran Canaria	Georoc 2020	[4752]	27.6149	27.6149	-16.1633	-16.1633	s_157-956B-55R-3,142-147	Basalt		VOLCANIC ROCK	WR [4752]	45.8	2.9		9.56					11.52	12.8	11.01	0.16		0.29	1.64	0.31																2.24	131718
Atlantic	Canary Islands	Gran Canaria	Georoc 2020	[4752]	27.6149	27.6149	-16.1633	-16.1633	s_157-956B-56R-2,89-103	Basalt		VOLCANIC ROCK	WR [4752]	45.2	3.57		10.3					11.7	7.73	11.38	0.16		1.37	2.6	0.51																4.19	131719
Atlantic	Canary Islands	Gran Canaria	Georoc 2020	[4752]	27.6149	27.6149	-16.1633	-16.1633	s_157-956B-56R-3,69-77	Basalt		VOLCANIC ROCK	WR [4752]	44.7	3.45		13.3					10.44	7.44	6.37	0.15		2.13	3.74	0.46																5.75	131720
Atlantic	Canary Islands	Gran Canaria	Georoc 2020	[4752]	27.6149	27.6149	-16.1633	-16.1633	s_157-956B-57R-1,0-5	Basalt		VOLCANIC ROCK	WR [4752]	45.7	3.95		11.5					12.69	10.6	7.63	0.18		0.61	2.44	0.46																2.63	131721
Atlantic	Canary Islands	Gran Canaria	Georoc 2020	[4752]	27.6149	27.6149	-16.1633	-16.1633	s_157-956B-57R-1,25-31	Basalt		VOLCANIC ROCK	WR [4752]	44.5	4.82		12.4					12.96	8.58	6.37	0.19		1.51	3.22	0.62																2.85	131722
Atlantic	Canary Islands	Gran Canaria	Georoc 2020	[4752]	27.6149	27.6149	-16.1633	-16.1633	s_157-956B-57R-1,55-63	Basalt		VOLCANIC ROCK	WR [4752]	46.2	3.59		9.69					13.37	10.4	9.62	0.16		0.78	2.16	0.38																1.71	131723
Atlantic	Canary Islands	Gran Canaria	Georoc 2020	[4752]	27.6149	27.6149	-16.1633	-16.1633	s_157-956B-57R-1,93-101	Basalt		VOLCANIC ROCK	WR [4752]	44.7	3.4		9.08					13.41	11.3	10.99	0.17		0.38	1.84	0.36																2.42	131724
Atlantic	Canary Islands	Gran Canaria	Georoc 2020	[4752]	27.6149	27.6149	-16.1633	-16.1633	s_157-956B-46R-3,133-148	Basalt		VOLCANIC ROCK	WR [4752]	43.75	5.5		15.09					10.79	9.79	5.49	0.25		1.06	3.02	0.55																2.78	131725
Atlantic	Canary Islands	Gran Canaria	Georoc 2020	[4752]	27.6149	27.6149	-16.1633	-16.1633	s_157-956B-47R-3,58-64	Basalt		VOLCANIC ROCK	WR [4752]	45.32	3.51		11.13					12.2	11.24	9.21	0.17		0.54	2.12	0.38																2	131726
Atlantic	Canary Islands	Gran Canaria	Georoc 2020	[4752]	27.6149	27.6149	-16.1633	-16.1633	s_157-956B-48R-2,25-42	Basalt		VOLCANIC ROCK	WR [4752]	46.68	3.09		9.6					11.54	11.67	11.9	0.17		0.51	1.72	0.31																1.05	131727
Atlantic	Canary Islands	Gran Canaria	Georoc 2020	[4752]	27.6149	27.6149	-16.1633	-16.1633	s_157-956B-52R-1,97-106	Basalt		VOLCANIC ROCK	WR [4752]	45.95	3.78		12.23					10.83	9.16	7.87	0.16		1.29	2.83	0.39																3.6	131728
Atlantic	Canary Islands	Gran Canaria	Georoc 2020	[4752]	27.6149	27.6149	-16.1633	-16.1633	s_157-956B-52R-4,66-70	Basalt		VOLCANIC ROCK	WR [4752]	44.95	3.98		10.67					12.52	10.93	10.1	0.2		0.51	1.99	0.45																1.97	131729
Atlantic	Canary Islands	Gran Canaria	Georoc 2020	[4752]	27.6149	27.6149	-16.1633	-16.1633	s_157-956B-53R-4,101-111	Basalt		VOLCANIC ROCK	WR [4752]	47.8	4		13.89					10.28	10.69	5.85	0.17		1.24	2.85	0.5																1.45	131730
Atlantic	Canary Islands	Gran Canaria	Georoc 2020	[4752]	27.6149	27.6149	-16.1633	-16.1633	s_157-956B-53R-4,112-125	Basalt		VOLCANIC ROCK	WR [4752]	43.99	4		9.63					13.28	9.89	10.81	0.18		0.75	2.06	0.44																2.8	131731
Atlantic	Canary Islands	Gran Canaria	Georoc 2020	[4752]	27.6149	27.6149	-16.1633	-16.1633	s_157-956B-55R-3,23-33	Basalt		VOLCANIC ROCK	WR [4752]	45.23	3.54		10.26					11.63	10.51	9.8	0.19		1.47	1.98	0.41																2.86	131732
Atlantic	Canary Islands	Gran Canaria	Georoc 2020	[4752]	27.6149	27.6149	-16.1633	-16.1633	s_157-956B-56R-1,4-18	Basalt		VOLCANIC ROCK	WR [4752]	45.3	4.32		11.06					12.31	7.77	11.05	0.17		0.85	2.27	0.5																3.06	131733
Atlantic	Canary Islands	Gran Canaria	Georoc 2020	[4752]	27.6149	27.6149	-16.1633	-16.1633	s_157-956B-56R-1,18-30	Basalt		VOLCANIC ROCK	WR [4752]	45.51	4.23		10.93					12.39	7.71	11.12	0.17		0.89	2.23	0.49																2.65	131734
Atlantic	Canary Islands	Gran Canaria	Georoc 2020	[4752]	27.6149	27.6149	-16.1633	-16.1633	s_157-956B-56R-1,50-67	Basalt		VOLCANIC ROCK	WR [4752]	43.32	4.06		11.07					12.53	8.55	10.62	0.18		1.02	2.13	0.45																3.98	131735
Atlantic	Canary Islands	Gran Canaria	Georoc 2020	[4752]	27.6149	27.6149	-16.1633	-16.1633	s_157-956B-56R-3,36-49	Basalt		VOLCANIC ROCK	WR [4752]	44.99	4.33		12.41					12.49	10.05	7.45	0.18		0.74	2.52	0.46																2.61	131736
Atlantic	Canary Islands	Gran Canaria	Georoc 2020	[4752]	27.6149	27.6149	-16.1633	-16.1633	s_157-956B-44R-4,27-42	Basalt		VOLCANIC ROCK	GL [4752]	50.11	4.37		12.97				13.37		8.2	4.05	0.25		1.85	2.97													0.02					131833
Atlantic	Canary Islands	Gran Canaria	Georoc 2020	[4752]	27.6149	27.6149	-16.1633	-16.1633	s_157-956B-44R-4,27-42	Basalt		VOLCANIC ROCK	GL [4752]	48.44	4.86		12.74				13.66		8.84	4.43	0.26		1.68	3.01													0.02					131834
Atlantic	Canary Islands	Gran Canaria	Georoc 2020	[4752]	27.6149	27.6149	-16.1633	-16.1633	s_157-956B-44R-4,110-124	Basalt		VOLCANIC ROCK	GL [4752]	49.41	5.3		12.96				12.09		9.17	4.91	0.2		1.65	2.87													0.03					131835
Atlantic	Canary Islands	Gran Canaria	Georoc 2020	[4752]	27.6149	27.6149	-16.1633	-16.1633	s_157-956B-44R-5,114-121	Basalt		VOLCANIC ROCK	GL [4752]	50.51	4.21		13.07				13.11		8.09	4.01	0.26		1.95	3.14													0					131836
Atlantic	Canary Islands	Gran Canaria	Georoc 2020	[4752]	27.6149	27.6149	-16.1633	-16.1633	s_157-956B-44R-5,114-121	Basalt		VOLCANIC ROCK	GL [4752]	50.46	4.1		13.02				13.11		8.05	3.91	0.25		1.92	3.07													0.03					131837
Atlantic	Canary Islands	Lanzarote / Tinguaton Crater / Timanfaya Eruption	Georoc 2020	[22296]	29.01	29.01	-13.68	-13.68	s_TGN	Not Given		VOLCANIC ROCK	WR [22296]	43.4	2.86		11.9					11.07	10.2	13	0.18		1.44	2.66	0.93																	1367590
Atlantic	Canary Islands	Lanzarote / Nuevo Del Fuego / Timanfaya Eruption	Georoc 2020	[22296]	29.01	29.01	-13.68	-13.68	s_VNF	Not Given		VOLCANIC ROCK	WR [22296]	43.2	2.76		11.4					11.07	10.2	14.3	0.18		1.19	3.16	0.9																	1367591
Atlantic	Canary Islands	Lanzarote / Caldera De Los Cuervos / Timanfaya Eruption	Georoc 2020	[22296]	29.01	29.01	-13.68	-13.68	s_3-5 CC	Not Given		VOLCANIC ROCK	WR [22296]	42.2	2.95		10.4					11.88	9.52	16.7	0.19		1.47	2.98	1.02																	1367592
Atlantic	Canary Islands	Lanzarote / Caldera De Los Cuervos / Timanfaya Eruption	Georoc 2020	[22296]	29.01	29.01	-13.68	-13.68	s_3-6 CC	Not Given		VOLCANIC ROCK	WR [22296]	41.7	3.07		10.9					11.88	10.4	14.6	0.2		1.49	3.14	1.1																	1367593
Atlantic	Canary Islands	Lanzarote / La Cazoleta Crater / Timanfaya Eruption	Georoc 2020	[22296]	29.01	29.01	-13.68	-13.68	s_6-1 PP	Not Given		VOLCANIC ROCK	WR [22296]	44.8	2.69		12.7					11.52	10.5	11.7	0.18		1.06	3.17	0.67																	1367594
Atlantic	Canary Islands	Lanzarote / Pico Partido / Timanfaya Eruption	Georoc 2020	[22296]	29.01	29.01	-13.68	-13.68	s_6-2 PP	Not Given		VOLCANIC ROCK	WR [22296]	46.5	2.4		11.8					11.07	9.63	13.4	0.17		0.8	2.99	0.57																	1367595
Atlantic	Canary Islands	Lanzarote / Volcan Del Quemado / Timanfaya Eruption	Georoc 2020	[22296]	29.01	29.01	-13.68	-13.68	s_17-1 VQ	Not Given		VOLCANIC ROCK	WR [22296]	47.2	2.43		12.8					10.98	9.07	11.2	0.16		0.82	3.01	0.42																	1367596
Atlantic	Canary Islands	Lanzarote / Montana Del Senalo / Timanfaya Eruption	Georoc 2020	[22296]	29.01	29.01	-13.68	-13.68	s_5-1 MS	Not Given		VOLCANIC ROCK	WR [22296]	49	2.49		13					10.62	9.05	9.8	0.15		0.76	2.89	0.37																	1367597
Atlantic	Canary Islands	Lanzarote / Montana De Fuego / Timanfaya Eruption	Georoc 2020	[22296]	29.01	29.01	-13.68	-13.68	s_8-2 MF	Not Given		VOLCANIC ROCK	WR [22296]	49.1	2.41		12.8					10.62	9.7	10	0.16		0.72	2.81	0.43																	1367598
Atlantic	Canary Islands	Lanzarote / Los Hornitos Crater / Timanfaya Eruption	Georoc 2020	[22296]	29.01	29.01	-13.68	-13.68	s_19-1 LH	Not Given		VOLCANIC ROCK	WR [22296]	48.7	2.4		13					10.62	8.82	10.3	0.16		0.77	2.8	0.4																	1367599
Atlantic	Canary Islands	Lanzarote / Montana Colorada / Timanfaya Eruption	Georoc 2020	[22296]	29.01	29.01	-13.68	-13.68	s_1-2 MC	Not Given		VOLCANIC ROCK	WR [22296]	50	2.41		13.1					10.44	9.12	10.3	0.15		0.65	2.91	0.36																	1367600
Atlantic	Canary Islands	Lanzarote / Montana Colorada / Timanfaya Eruption	Georoc 2020	[22296]	29.01	29.01	-13.68	-13.68	s_1-3 MC	Not Given		VOLCANIC ROCK	WR [22296]	50.4	2.41		13.4					10.26	8.62	9.7	0.15		0.71	2.59	0.37																	1367601
Atlantic	Canary Islands	Lanzarote / Montana De Las Nueces / Timanfaya Eruption	Georoc 2020	[22296]	29.01	29.01	-13.68	-13.68	s_2-1 MN	Not Given		VOLCANIC ROCK	WR [22296]	50.2	2.35		13					10.53	9.28	10	0.15		0.62	2.57	0.32																	1367602
Atlantic	Canary Islands	Lanzarote	Georoc 2020	[920]	29	29	-13.6	-13.6	s_ND7	Basalt, Alkaline		VOLCANIC ROCK	WR [920]	45.34	2.81		16.03			5.19	5.32		7.75	4.05	0.16		1.43	3.59	0.6																	13734
Atlantic	Canary Islands	Lanzarote	Georoc 2020	[920]	29	29	-13.6	-13.6	s_L6	Basalt, Alkaline		VOLCANIC ROCK	WR [920]	47.67	2.62		13.28			4.7	6.76		9.75	9.53	0.14		0.88	3.34	0.52																	13735
Atlantic	Canary Islands	Lanzarote	Georoc 2020	[920]	29	29	-13.6	-13.6	s_L88B	Basalt, Alkaline		VOLCANIC ROCK	WR [920]	44.29	2.55		13.4			3.72	8.03		10.34	10.94	0.15		1.13	3.18	0.66																	13736
Atlantic	Canary Islands	Lanzarote	Georoc 2020	[920]	29	29	-13.6	-13.6	s_L5	Basalt, Alkaline		VOLCANIC ROCK	WR [920]	49.97	2.17		13.41			1.13	9.36		9.21	9.89	0.14		0.58	2.92	0.3																	13737
Atlantic	Canary Islands	Lanzarote	Georoc 2020	[920]	29	29	-13.6	-13.6	s_A560	Basalt, Alkaline		VOLCANIC ROCK	WR [920]	43.53	2.66		12.05			2.83	8.5		10.58	13.11	0.17		1.18	3.29	0.88																	13738
Atlantic	Canary Islands	Tenerife	Georoc 2020	[920]	28	28.6	-16.1	-16.9	s_ND4	Basalt, Alkaline		VOLCANIC ROCK	WR [920]	47.47	2.45		16.48			3.24	5.93		6.95	3.25	0.2		1.82	5.15	0.93																	13739
Atlantic	Canary Islands	Tenerife	Georoc 2020	[920]	28	28.6	-16.1	-16.9	s_AD9	Basalt, Alkaline		VOLCANIC ROCK	WR [920]	43.71	2.9		13.21			3.72	8.56		10.14	11.19	0.17		0.91	2.47	0.64																	13740
Atlantic	Canary Islands	Tenerife	Georoc 2020	[920]	28	28.6	-16.1	-16.9	s_ND3	Basalt, Alkaline		VOLCANIC ROCK	WR [920]	41.46	3.57		15.83			3.04	8.25		10.03	4.8	0.16		1.56	4.14	0.83																	13742
Atlantic	Canary Islands	Tenerife / Shield Stage	Georoc 2020	[1501][4844]	28.3108	28.3108	-16.8439	-16.8439	s_TF4	Basalt	Aphyric [1501]	VOLCANIC ROCK	WR [1501]	45.05	3.62		15.26					11.54	9.61	4.17	0.2		2	2.46	1.24																2.01	14100-TF4
Atlantic	Canary Islands	Gran Canaria / Tejeda Caldera / Mogan Formation	Georoc 2020	[707]	28	28	-15.6	-15.6	s_719	Basalt, Alkaline		VOLCANIC ROCK	WR [707]	45.5	4.13		14.8			8.79	3.3		10.7	5.37	0.19		1.51	3	0.72		1.96			0.19												14341
Atlantic	Canary Islands	Gran Canaria / El Tablero Formation	Georoc 2020	[707]	28	28	-15.6	-15.6	s_799	Nephelinite		VOLCANIC ROCK	WR [707]	44.9	3.85		15.2			6.74	5.15		10.1	4.97	0.19		2.22	2.2	1.32		1.67			0.07												14342
Atlantic	Canary Islands	Gran Canaria / Roque Nublo Formation	Georoc 2020	[707]	28	28	-15.6	-15.6	s_1419	Basalt, Alkaline		VOLCANIC ROCK	WR [707]	45	3.72		13			7.2	6.37		11	7.49	0.18		1.02	2.45	0.84		1.87			0.18												14343
Atlantic	Canary Islands	Gran Canaria / Los Llanos Formation	Georoc 2020	[707]	28	28	-15.6	-15.6	s_1449	Nephelinite		VOLCANIC ROCK	WR [707]	41.9	3.7		11.6			3.51	8.1		12.1	12.4	0.18		1.59	2.63	0.78		0.6			0.06												14344
Atlantic	Canary Islands	Gran Canaria / Los Llanos Formation	Georoc 2020	[707]	28	28	-15.6	-15.6	s_1450	Nephelinite		VOLCANIC ROCK	WR [707]	38.9	4.37		10.4			6.45	6.97		13	11.7	0.19		0.62	3.29	1.42		1.35			0.2												14345
Atlantic	Canary Islands	Gran Canaria / Post Los Llanos Formation	Georoc 2020	[707]	28	28	-15.6	-15.6	s_HS307	Nephelinite		VOLCANIC ROCK	WR [707]	38.4	5.62		9.8			4.12	10.3		11.6	12.7	0.19		1.15	2.9	1.17		1.34			0.05												14346
Atlantic	Canary Islands	Tenerife / Pico Teide	Georoc 2020	[1173]	28.3	28.3	-16.6	-16.6	s_AF1	Phonolite	Nearly Aphyric [1173]	VOLCANIC ROCK	WR [1173]	63.13	0.42		19.89					2.56	0.78	0.26	0.24		7.3	5.09	0.05																	14347
Atlantic	Canary Islands	Tenerife / Pico Teide	Georoc 2020	[1173]	28.3	28.3	-16.6	-16.6	s_AF3	Phonolite	Nearly Aphyric [1173]	VOLCANIC ROCK	WR [1173]	56.45	1.82		19.01					5.88	4.87	1.77	0.22		3.58	5.27	0.48																	14348
Atlantic	Canary Islands	Tenerife / Pico Teide	Georoc 2020	[1173]	28.3	28.3	-16.6	-16.6	s_EF2	Phonolite	Nearly Aphyric [1173]	VOLCANIC ROCK	WR [1173]	61.93	0.61		18.88					2.84	0.64	0.46	0.21		6.54	7.51	0.06																	14350
Atlantic	Canary Islands	Tenerife / Pico Teide	Georoc 2020	[1173]	28.3	28.3	-16.6	-16.6	s_EF4	Phonolite	Nearly Aphyric [1173]	VOLCANIC ROCK	WR [1173]	62.33	0.72		18.65					2.93	0.79	0.54	0.2		6.23	7.18	0.1																	14351
Atlantic	Canary Islands	Tenerife / Pico Teide	Georoc 2020	[1173]	28.3	28.3	-16.6	-16.6	s_GF3	Phonolite	Nearly Aphyric [1173]	VOLCANIC ROCK	WR [1173]	60.85	0.56		19.76					3.06	0.75	0.43	0.25		5.81	8.13	0.06																	14352
Atlantic	Canary Islands	Tenerife / Pico Teide	Georoc 2020	[1173]	28.3	28.3	-16.6	-16.6	s_G678	Phonolite	Nearly Aphyric [1173]	VOLCANIC ROCK	WR [1173]	61.18	0.47		20.03					3.12	0.59	0.38	0.26		6.08	7.49	0.05																	14353
Atlantic	Canary Islands	Tenerife / Pico Teide	Georoc 2020	[1173]	28.3	28.3	-16.6	-16.6	s_GIGL	Phonolite	Nearly Aphyric [1173]	VOLCANIC ROCK	WR [1173]	61.69	0.63		19.33					2.96	0.73	0.53	0.24		6.81	6.67	0.08																	14354
Atlantic	Canary Islands	Gran Canaria	Georoc 2020	[504][523]	28	28	-15.6	-15.6	s_12870	Phonolite		VOLCANIC ROCK	WR [504]	62.73	0.92		17.73					3.59	1	0.44	0.24		5.47	6.21	0.12																	1459-12870
Atlantic	Canary Islands	Gran Canaria	Georoc 2020	[504][523]	28	28	-15.6	-15.6	s_12873	Ankaramite		VOLCANIC ROCK	WR [504]	42	3.5		11.2			3.8	8.3		12.1	14.5	0.19		1.32	2.92		0.05																1459-12873
Atlantic	Canary Islands	Gran Canaria	Georoc 2020	[504][523]	28	28	-15.6	-15.6	s_12879	Basalt, Alkaline, Olivine		VOLCANIC ROCK	WR [504]	48.5	3.82		16.7			6.9	4.1		10.5	4.8	0.21		1.14	3.93		2.37																1459-12879
Atlantic	Canary Islands	Gran Canaria	Georoc 2020	[504][523]	28	28	-15.6	-15.6	s_12882	Phonolite		VOLCANIC ROCK	WR [504]	54.9	1.24		19.3					3.81	3.2	1.4	0.19		5.77	9.5	0.22	1.6																1459-12882
Atlantic	Canary Islands	Gran Canaria	Georoc 2020	[504][523]	28	28	-15.6	-15.6	s_12891	Basalt, Alkaline, Olivine		VOLCANIC ROCK	WR [504]	48.02	3.44		17.81					7.82	9.65	3.89	0.17		2.36	3.63	1.01	1.92																1459-12891
Atlantic	Canary Islands	El Hierro	Georoc 2020	[12930]	27.8	27.8	-18	-18	s_CIHI01	Tephrite		VOLCANIC ROCK	WR [12930]	45.3	3.65		16.03			3.48	8.35		9.76	5.07	0.2		1.61	4.51	1.04	0.6																1460-CIHI01
Atlantic	Canary Islands	El Hierro	Georoc 2020	[12930]	27.8	27.8	-18	-18	s_CIHI11	Tephrite		VOLCANIC ROCK	WR [12930]	44.64	4		16.37			6.48	4.43		9.94	4.77	0.18		2.02	5.01	1.2	0.49																1460-CIHI11
Atlantic	Canary Islands	El Hierro	Georoc 2020	[12930]	27.8	27.8	-18	-18	s_CIHI13	Basanite		VOLCANIC ROCK	WR [12930]	41.19	4.26		11.03			4.66	9.51		11.89	12	0.17		1.02	2.81	0.68	0.43																1460-CIHI13
Atlantic	Canary Islands	El Hierro	Georoc 2020	[12930]	27.8	27.8	-18	-18	s_CIHI15	Tephrite		VOLCANIC ROCK	WR [12930]	44.16	3.88		15.21			4.81	7.78		10.07	5.47	0.2		1.76	4.52	1.22	0.5																1460-CIHI15
Atlantic	Canary Islands	Tenerife / Pico Teide / Recent Series	Georoc 2020	[6298]	28.3	28.3	-16.6	-16.6	s_MB5-8.5	Phonolite		VOLCANIC ROCK	GL [6298]	60.36	0.57		18.79					3.52	0.65	0.35	0.19		5.51	9.92	0.13	0.04						0.16	0.31									147020
Atlantic	Canary Islands	Tenerife / Pico Teide / Recent Series	Georoc 2020	[6298]	28.3	28.3	-16.6	-16.6	s_MB5-7.13	Phonolite		VOLCANIC ROCK	GL [6298]	60.31	0.59		18.77					3.5	0.72	0.35	0.22		5.41	10.01	0.13	0.1						0.17	0.33									147021
Atlantic	Canary Islands	Tenerife / Pico Teide / Recent Series	Georoc 2020	[6298]	28.3	28.3	-16.6	-16.6	s_MB5-7.22	Phonolite		VOLCANIC ROCK	GL [6298]	60.34	0.59		18.81					3.55	0.61	0.36	0.21		5.38	10.02	0.14	0.08						0.17	0.33									147022
Atlantic	Canary Islands	Tenerife / Pico Teide / Recent Series	Georoc 2020	[6298]	28.3	28.3	-16.6	-16.6	s_MB5-6.28	Phonolite		VOLCANIC ROCK	GL [6298]	60.29	0.59		18.73					3.51	0.61	0.35	0.21		5.51	10.07	0.14	0.09						0.13	0.31									147023
Atlantic	Canary Islands	Tenerife / Pico Teide / Recent Series	Georoc 2020	[6298]	28.3	28.3	-16.6	-16.6	s_MB5-6.36	Phonolite		VOLCANIC ROCK	GL [6298]	60.32	0.59		18.77					3.48	0.61	0.34	0.18		5.43	10.15	0.12	0.11						0.15	0.34									147024
Atlantic	Canary Islands	Tenerife / Pico Teide / Recent Series	Georoc 2020	[6298]	28.3	28.3	-16.6	-16.6	s_MB5-4.45	Phonolite		VOLCANIC ROCK	GL [6298]	60.41	0.65		18.66					3.46	0.72	0.33	0.21		5.48	10.02	0.07	0.08						0.14	0.35									147025
Atlantic	Canary Islands	Tenerife / Pico Teide / Recent Series	Georoc 2020	[6298]	28.3	28.3	-16.6	-16.6	s_MB5-4.49	Phonolite		VOLCANIC ROCK	GL [6298]	60.45	0.66		18.51					3.41	0.67	0.33	0.2		5.74	9.96	0.07	0.08						0.17	0.33									147026
Atlantic	Canary Islands	Tenerife / Pico Teide / Recent Series	Georoc 2020	[6298]	28.3	28.3	-16.6	-16.6	s_MB5-4.53	Phonolite		VOLCANIC ROCK	GL [6298]	60.49	0.58		18.86					3.43	0.78	0.34	0.2		5.48	9.89	0.14	0.09						0.13	0.31									147027
Atlantic	Canary Islands	Tenerife / Pico Teide / Recent Series	Georoc 2020	[6298]	28.3	28.3	-16.6	-16.6	s_MB5-4.54	Phonolite		VOLCANIC ROCK	GL [6298]	60.62	0.57		18.87					3.44	0.67	0.34	0.2		5.43	9.92	0.13	0.07						0.17	0.31									147028
Atlantic	Canary Islands	Tenerife / Pico Teide / Recent Series	Georoc 2020	[6298]	28.3	28.3	-16.6	-16.6	s_MB5-4.56	Phonolite		VOLCANIC ROCK	GL [6298]	60.54	0.65		18.59					3.37	0.63	0.34	0.19		5.57	10.07	0.07	0.08						0.16	0.36									147029
Atlantic	Canary Islands	Tenerife / Pico Teide / Recent Series	Georoc 2020	[6298]	28.3	28.3	-16.6	-16.6	s_MB5-4.58	Phonolite		VOLCANIC ROCK	GL [6298]	60.56	0.65		18.42					3.41	0.76	0.33	0.2		5.56	9.99	0.12	0.08						0.17	0.33									147030
Atlantic	Canary Islands	Tenerife / Pico Teide / Recent Series	Georoc 2020	[6298]	28.3	28.3	-16.6	-16.6	s_MB5-3.61	Phonolite		VOLCANIC ROCK	GL [6298]	60.4	0.56		18.81					3.53	0.65	0.34	0.21		5.54	9.82	0.13	0.08						0.17	0.31									147031
Atlantic	Canary Islands	Tenerife / Pico Teide / Recent Series	Georoc 2020	[6298]	28.3	28.3	-16.6	-16.6	s_MB5-4.64	Phonolite		VOLCANIC ROCK	GL [6298]	60.54	0.65		18.54					3.38	0.6	0.33	0.2		5.65	10.06	0.06	0.07						0.16	0.33									147032
Atlantic	Canary Islands	Tenerife / Pico Teide / Recent Series	Georoc 2020	[6298]	28.3	28.3	-16.6	-16.6	s_MB5-4.66	Phonolite		VOLCANIC ROCK	GL [6298]	60.4	0.66		18.69					3.39	0.66	0.32	0.21		5.56	10.05	0.07	0.07						0.15	0.34									147033
Atlantic	Canary Islands	Tenerife / Pico Teide / Recent Series	Georoc 2020	[6298]	28.3	28.3	-16.6	-16.6	s_MB5-3.68	Phonolite		VOLCANIC ROCK	GL [6298]	60.39	0.58		18.79					3.47	0.65	0.34	0.21		5.46	9.98	0.13	0.07						0.15	0.3									147034
Atlantic	Canary Islands	Tenerife / Post-Caldera Stage	Georoc 2020	[6298]	28.3	28.3	-16.6	-16.6	s_GUASCC2	Phonolite		VOLCANIC ROCK	GL [6298]	61.82	0.76		17.64					3.19	0.57	0.36	0.26		5.51	9.84	0.05	0.12						0.2	0.23									147035
Atlantic	Canary Islands	Tenerife / Post-Caldera Stage	Georoc 2020	[6298]	28.3	28.3	-16.6	-16.6	s_GUASCC5	Phonolite		VOLCANIC ROCK	GL [6298]	61.83	0.74		17.83					3.14	0.58	0.34	0.23		5.53	9.72	0.06	0.12						0.23	0.23									147036
Atlantic	Canary Islands	Tenerife / Post-Caldera Stage	Georoc 2020	[6298]	28.3	28.3	-16.6	-16.6	s_GUASCC7	Phonolite		VOLCANIC ROCK	GL [6298]	61.92	0.73		17.8					3.13	0.57	0.33	0.26		5.37	9.83	0.05	0.13						0.17	0.24									147037
Atlantic	Canary Islands	Tenerife / Post-Caldera Stage	Georoc 2020	[6298]	28.3	28.3	-16.6	-16.6	s_GUASCC10	Phonolite		VOLCANIC ROCK	GL [6298]	61.8	0.73		17.83					3.12	0.55	0.33	0.23		5.5	9.86	0.06	0.12						0.17	0.24									147038
Atlantic	Canary Islands	Tenerife / Post-Caldera Stage	Georoc 2020	[6298]	28.3	28.3	-16.6	-16.6	s_GUASCC12	Phonolite		VOLCANIC ROCK	GL [6298]	61.66	0.74		17.74					3.12	0.54	0.33	0.25		5.59	9.77	0.06	0.12						0.18	0.24									147039
Atlantic	Canary Islands	Tenerife / Post-Caldera Stage	Georoc 2020	[6298]	28.3	28.3	-16.6	-16.6	s_GUASCC15	Phonolite		VOLCANIC ROCK	GL [6298]	61.98	0.73		17.66					3.1	0.56	0.34	0.24		5.41	9.91	0.05	0.1						0.16	0.25									147040
Atlantic	Canary Islands	Gran Canaria / Upper Mogan Formation, Ignimbrite D	Georoc 2020	[1276]	27.81	27.81	-15.73	-15.73	s_KOG58	Rhyolite	Almost Aphyric [1276]	VOLCANIC ROCK	WR [1276]	68.2	1.14		10					7.14	0.18	0.38	0.44		5.03	5.45	0.07	0.85				0												14747
Atlantic	Canary Islands	Gran Canaria / Upper Mogan Formation, Ignimbrite D	Georoc 2020	[1276]	27.81	27.81	-15.73	-15.73	s_KOG59	Trachyte		VOLCANIC ROCK	WR [1276]	66.3	1.08		12.2					5.97	0.42	0.62	0.33		5.08	6.4	0.12	0.56				0.17												14748
Atlantic	Canary Islands	Gran Canaria / Upper Mogan Formation, Ignimbrite D	Georoc 2020	[1276]	27.81	27.81	-15.73	-15.73	s_KOG60	Trachyte		VOLCANIC ROCK	WR [1276]	65.1	1.07		11.8					6	0.23	0.56	0.32		4.97	6.22	0.09	0.61				0.06												14749
Atlantic	Canary Islands	Gran Canaria / Upper Mogan Formation, Ignimbrite D	Georoc 2020	[1276]	27.81	27.81	-15.73	-15.73	s_KOG61	Trachyte		VOLCANIC ROCK	WR [1276]	65.6	1.08		13.7					5.63	0.27	0.75	0.34		4.99	6.57	0.07	0.72				0.04												14750
Atlantic	Canary Islands	Gran Canaria / Upper Mogan Formation, Ignimbrite D	Georoc 2020	[1276]	27.81	27.81	-15.73	-15.73	s_KOG62	Trachyte		VOLCANIC ROCK	WR [1276]	65	1.1		14.4					5.07	0.37	0.73	0.18		4.61	7.1	0.07	0.57				0.03												14751
Atlantic	Canary Islands	Gran Canaria / Upper Mogan Formation, Ignimbrite D	Georoc 2020	[1276]	27.81	27.81	-15.73	-15.73	s_KOG63	Trachyte		VOLCANIC ROCK	WR [1276]	64.3	1.08		14.6					5.22	0.33	0.77	0.23		4.56	6.84	0.07	1.16				0.02												14752
Atlantic	Canary Islands	Gran Canaria / Upper Mogan Formation, Ignimbrite D	Georoc 2020	[1276]	27.81	27.81	-15.73	-15.73	s_KOG64	Trachyte		VOLCANIC ROCK	WR [1276]	66	1.1		13.8					5.25	0.37	0.7	0.25		4.63	6.96	0.07	0.33				0.03												14753
Atlantic	Canary Islands	Gran Canaria / Upper Mogan Formation, Ignimbrite D	Georoc 2020	[1276]	27.81	27.81	-15.73	-15.73	s_KOG65	Trachyte		VOLCANIC ROCK	WR [1276]	65.7	1.08		13.7					5.32	0.34	0.66	0.27		4.83	6.81	0.08	0.46				0.04												14754
Atlantic	Canary Islands	Gran Canaria / Upper Mogan Formation, Ignimbrite D	Georoc 2020	[1276]	27.81	27.81	-15.73	-15.73	s_KOG16	Pantellerite		VOLCANIC ROCK	GL [1276]	67.7	1.07		8.8					6.78	0.13	0.25	0.44		4.51	7.74	0.12	0.34				0.02								0.16				14755
Atlantic	Canary Islands	Gran Canaria / Upper Mogan Formation, Ignimbrite D	Georoc 2020	[1276]	27.81	27.81	-15.73	-15.73	s_KOG17	Pantellerite		VOLCANIC ROCK	GL [1276]	67.4	1.08		8.8					6.77	0.13	0.25	0.44		4.49	7.68	0.12	0.37				0.05								0.15				14756
Atlantic	Canary Islands	Gran Canaria / Upper Mogan Formation, Ignimbrite D	Georoc 2020	[1276]	27.83	27.83	-15.75	-15.75	s_KOG33	Pantellerite		VOLCANIC ROCK	GL [1276]	67.4	1.1		8.9					6.85	0.14	0.25	0.44		4.44	7.6	0.11	0.47				0.03								0.23				14757
Atlantic	Canary Islands	Fuerteventura / Basal Complex	Georoc 2020	[6325]	28	28	-14.5	-14.5	s_2	Basalt, Ankaramitic	Porphyritic, Microcrystalline Groundmass [6325]	VOLCANIC ROCK	WR [6325]	43.32	3.73		9.16			8.82	5.46		14.66	10.04	0.2		1.27	1.77	0.6																1	148673
Atlantic	Canary Islands	Fuerteventura / Basal Complex	Georoc 2020	[6325]	28	28	-14.5	-14.5	s_3	Trachybasalt		VOLCANIC ROCK	WR [6325]	45.73	4.14		13.74			6.66	5.32		9.51	6.41	0.17		1.35	3.68	0.5																1.1	148674
Atlantic	Canary Islands	Fuerteventura / Basal Complex	Georoc 2020	[6325]	28	28	-14.5	-14.5	s_4	Basalt, Ankaramitic	Porphyritic, Microcrystalline Groundmass [6325]	VOLCANIC ROCK	WR [6325]	41.4	4.29		9.65			7.93	6.7		13.18	9.32	0.2		1.88	1.8	0.75																1.3	148675
Atlantic	Canary Islands	Fuerteventura / Basal Complex	Georoc 2020	[6325]	28	28	-14.5	-14.5	s_5	Basalt, Ankaramitic	Porphyritic, Microcrystalline Groundmass [6325]	VOLCANIC ROCK	WR [6325]	43.81	4.73		13.56			6.41	6.79		9.35	5.08	0.18		1.55	3.77	0.76																2.91	148676
Atlantic	Canary Islands	Fuerteventura / Basal Complex	Georoc 2020	[6325]	28	28	-14.5	-14.5	s_6	Basalt, Ankaramitic	Porphyritic, Microcrystalline Groundmass [6325]	VOLCANIC ROCK	WR [6325]	41.06	4.42		13.66			6.59	5.51		11.14	5.5	0.2		1.94	4.17	1.2																3.39	148677
Atlantic	Canary Islands	Fuerteventura / Basal Complex	Georoc 2020	[6325]	28	28	-14.5	-14.5	s_8	Basalt, Ankaramitic	Porphyritic, Microcrystalline Groundmass [6325]	VOLCANIC ROCK	WR [6325]	42.32	4.35		10.74			8.72	5.43		11.07	9.2	0.18		1.48	2.33	0.65																2.81	148679
Atlantic	Canary Islands	Fuerteventura / Basal Complex	Georoc 2020	[6325]	28	28	-14.5	-14.5	s_9	Trachybasalt		VOLCANIC ROCK	WR [6325]	45.66	3.86		13.08			6.44	6.23		8.85	5.41	0.17		2.35	2.95	0.63																2.4	148680
Atlantic	Canary Islands	Fuerteventura / Basal Complex	Georoc 2020	[6325]	28	28	-14.5	-14.5	s_10	Trachybasalt		VOLCANIC ROCK	WR [6325]	45.18	4.58		11.86			6.8	6.14		9.25	6.39	0.12		1.79	2.93	0.67																2.29	148681
Atlantic	Canary Islands	Fuerteventura / Basal Complex	Georoc 2020	[6325]	28	28	-14.5	-14.5	s_11	Basalt, Ankaramitic	Porphyritic, Microcrystalline Groundmass [6325]	VOLCANIC ROCK	WR [6325]	42.22	4.12		10.9			6.02	6.47		12.46	9.51	0.15		1.16	1.31	0.84																3.69	148682
Atlantic	Canary Islands	Fuerteventura / Basal Complex	Georoc 2020	[6325]	28	28	-14.5	-14.5	s_12	Trachybasalt		VOLCANIC ROCK	WR [6325]	46.85	3.18		13.58			6.86	5.31		8.92	6.59	0.17		1.58	2.92	0.46																2.88	148683
Atlantic	Canary Islands	Fuerteventura / Basal Complex	Georoc 2020	[6325]	28	28	-14.5	-14.5	s_13	Trachybasalt		VOLCANIC ROCK	WR [6325]	47.3	4.25		13.17			8.1	4.9		8.8	5.17	0.14		0.57	4.44	0.55																1.6	148684
Atlantic	Canary Islands	Fuerteventura / Basal Complex	Georoc 2020	[6325]	28	28	-14.5	-14.5	s_14	Trachybasalt		VOLCANIC ROCK	WR [6325]	48.77	3.57		13.72			8.47	3.31		9.52	4.45	0.13		0.2	4.75	0.45																1.4	148685
Atlantic	Canary Islands	Fuerteventura / Basal Complex	Georoc 2020	[6325]	28	28	-14.5	-14.5	s_15	Trachybasalt		VOLCANIC ROCK	WR [6325]	45.32	3.84		12.18			6.3	6.39		10.24	6.98	0.16		1.56	2.75	0.46																2.91	148686
Atlantic	Canary Islands	Fuerteventura / Basal Complex	Georoc 2020	[6325]	28	28	-14.5	-14.5	s_16	Trachybasalt		VOLCANIC ROCK	WR [6325]	47.12	3.24		13.4			6.62	5.85		8.36	5.93	0.14		1.2	3.54	0.38																3.09	148687
Atlantic	Canary Islands	Fuerteventura / Basal Complex	Georoc 2020	[6325]	28	28	-14.5	-14.5	s_17	Trachybasalt		VOLCANIC ROCK	WR [6325]	48.25	2.8		11.26			4.89	6.06		9.19	9.49	0.15		0.89	2.68	0.37																3.49	148688
Atlantic	Canary Islands	Fuerteventura / Basal Complex	Georoc 2020	[6325]	28	28	-14.5	-14.5	s_18	Trachybasalt		VOLCANIC ROCK	WR [6325]	46.42	3.94		13.67			7.58	4.68		9.37	4.8	0.16		0.44	4.94	0.56																2	148689
Atlantic	Canary Islands	Fuerteventura / Basal Complex	Georoc 2020	[6325]	28	28	-14.5	-14.5	s_19	Trachybasalt		VOLCANIC ROCK	WR [6325]	46.57	3.39		13.77			7.35	5.52		6.98	6.15	0.15		0.41	4.73	0.43																3.5	148690
Atlantic	Canary Islands	La Palma	Georoc 2020	[854]	28.5	28.5	-18	-18	s_HOST	Basalt		VOLCANIC ROCK	WR [854]	44.28	3.64		13.11					11.8	11.37	8.26	0.19		1.76	3.83	0.89																	14928
Atlantic	Canary Islands	Tenerife / Pico Teide	Georoc 2020	[934]	28.3	28.3	-16.6	-16.6	s_B2	Hawaiite		VOLCANIC ROCK	WR [934]	46.51	3.36		17.17			5.31	5.17		9.31	4.43	0.17		1.98	5.28	1.26																	15132
Atlantic	Canary Islands	Tenerife / Pico Teide	Georoc 2020	[934]	28.3	28.3	-16.6	-16.6	s_B3	Hawaiite		VOLCANIC ROCK	WR [934]	46.78	3.39		17.31			5.03	5.45		9.15	4.44	0.17		1.93	5.04	1.27																	15133
Atlantic	Canary Islands	Tenerife / Pico Teide	Georoc 2020	[934]	28.3	28.3	-16.6	-16.6	s_T1	Trachyte	Massive [934]	VOLCANIC ROCK	WR [934]	58.74	1.14		18.52			1.97	2.61		2.24	1.06	0.15		4.95	8.23	0.35																	15141
Atlantic	Canary Islands	Tenerife / Pico Teide	Georoc 2020	[934]	28.3	28.3	-16.6	-16.6	s_T2	Trachyte	Massive [934]	VOLCANIC ROCK	WR [934]	58.53	1.2		18.49			1.82	2.88		2.38	1.12	0.15		4.77	8.2	0.4																	15142
Atlantic	Canary Islands	Tenerife / Pico Teide	Georoc 2020	[934]	28.3	28.3	-16.6	-16.6	s_T3	Trachyte	Massive [934]	VOLCANIC ROCK	WR [934]	59.17	1.08		18.54			3.27	1.24		1.98	0.93	0.14		5.04	8.23	0.32																	15143
Atlantic	Canary Islands	La Palma	Georoc 2020	[22897]	28.5	28.5	-18	-18	s_LP1	Basalt		VOLCANIC ROCK	WR [22897]	43.6	3.78		13.9					11.97	10.5	7.29	0.21		1.87	4.15	0.87																	1524083
Atlantic	Canary Islands	La Palma	Georoc 2020	[22897]	28.5	28.5	-18	-18	s_LP8	Basalt		VOLCANIC ROCK	WR [22897]	43.4	3.84		12.9					12.51	11.6	8.63	0.2		1.62	3.6	0.86																	1524084
Atlantic	Canary Islands	La Palma	Georoc 2020	[22897]	28.5	28.5	-18	-18	s_LP10	Basalt		VOLCANIC ROCK	WR [22897]	43.2	3.87		12.9					12.24	12.3	8.19	0.21		1.52	3.65	0.86																	1524085
Atlantic	Canary Islands	La Palma	Georoc 2020	[22897]	28.5	28.5	-18	-18	s_LP15	Basalt		VOLCANIC ROCK	WR [22897]	45.9	3.76		14.4					11.61	10.9	6.75	0.18		1.34	3.27	0.62																	1524086
Atlantic	Canary Islands	Tenerife	Georoc 2020	[22897]	28	28.6	-16.1	-16.9	s_TF 5	Basalt		VOLCANIC ROCK	WR [22897]	45.8	3.02		12.9					11.61	10.2	9.76	0.18		1.36	3.38	0.61																	1524087
Atlantic	Canary Islands	Lanzarote / Corona / Series Iv	Georoc 2020	[868]	29	29	-13.6	-13.6	s_1	Basalt, Olivine		VOLCANIC ROCK	WR [868]	48	2.36		13.14			3.33	7.79		9.8	10.4	0.14		0.97	3.12	0.51	0.22																15279
Atlantic	Canary Islands	Lanzarote / Los Helechos-La Quemada	Georoc 2020	[868]	29	29	-13.6	-13.6	s_2	Basalt, Olivine		VOLCANIC ROCK	WR [868]	47.8	2.22		13.19			2.21	8.88		9.9	10.5	0.14		0.93	3.19	0.58	0.24																15280
Atlantic	Canary Islands	Lanzarote / Los Helechos-La Quemada	Georoc 2020	[868]	29	29	-13.6	-13.6	s_3	Oceanite		VOLCANIC ROCK	WR [868]	46.9	2.16		13.06			3.17	7.99		10.2	10.73	0.14		0.97	3.31	0.67	0.28																15281
Atlantic	Canary Islands	Lanzarote / Corona	Georoc 2020	[868]	29	29	-13.6	-13.6	s_4	Basalt, Olivine		VOLCANIC ROCK	WR [868]	46.3	2.78		13.7			2.7	8.46		10.2	10.65	0.18		1.22	3.09	0.7	0.3				0												15282
Atlantic	Canary Islands	Lanzarote / Corona	Georoc 2020	[868]	29	29	-13.6	-13.6	s_5	Basalt, Olivine-Augite		VOLCANIC ROCK	WR [868]	46	2.42		12.53			4.85	6.94		10.25	11.21	0.15		1.18	3.02	0.69	0.58				0												15283
Atlantic	Canary Islands	Lanzarote / Los Helechos-La Quemada	Georoc 2020	[868]	29.22	29.22	-13.45	-13.45	s_6	Basalt, Olivine-Augite		VOLCANIC ROCK	WR [868]	44.5	2.54		12.4			9.35	2.95		10.35	12.24	0.15		1.3	3.02	0.71	0.34																15284
Atlantic	Canary Islands	Lanzarote / Los Helechos-La Quemada	Georoc 2020	[868]	29	29	-13.6	-13.6	s_7	Basalt, Olivine-Augite		VOLCANIC ROCK	WR [868]	44.3	2.7		12.27			3.07	8.95		10.82	11.72	0.16		1.34	3.12	0.65	0.55				0.05												15285
Atlantic	Canary Islands	Lanzarote / Los Helechos-La Quemada	Georoc 2020	[868]	29	29	-13.6	-13.6	s_8	Oceanite		VOLCANIC ROCK	WR [868]	42.9	2.72		12.35			3.81	8.44		10.62	12.4	0.16		1.6	3.5	0.89	0.35				0.1												15286
Atlantic	Canary Islands	Lanzarote	Georoc 2020	[868]	29	29	-13.6	-13.6	s_9	Basalt, Olivine		VOLCANIC ROCK	WR [868]	50.15	1.98		13.76			1.54	9.07		10.09	8.97	0.12		0.7	2.8	0.3	0.37																15287
Atlantic	Canary Islands	Lanzarote	Georoc 2020	[868]	29	29	-13.6	-13.6	s_10	Basalt, Olivine-Augite		VOLCANIC ROCK	WR [868]	49.95	1.89		12.84			3.23	7.28		8.92	11.27	0.12		0.8	2.76	0.33	0.34				0.05												15288
Atlantic	Canary Islands	Lanzarote / Masdache	Georoc 2020	[868]	29	29	-13.6	-13.6	s_11	Basalt, Olivine		VOLCANIC ROCK	WR [868]	49.95	1.88		13.69			1.3	9.2		9.67	9.58	0.11		0.76	2.92	0.29	0.49																15289
Atlantic	Canary Islands	Lanzarote	Georoc 2020	[868]	29	29	-13.6	-13.6	s_12	Basalt		VOLCANIC ROCK	WR [868]	49.3	3.79		13.08			0.96	10.44		9.4	9.57			1.58	2.59		0																15290
Atlantic	Canary Islands	Lanzarote	Georoc 2020	[868]	29	29	-13.6	-13.6	s_13	Basalt, Olivine		VOLCANIC ROCK	WR [868]	49.25	2.01		13.42			3.88	7.67		9.62	9.52	0.13		0.8	2.94	0.33	0.41																15291
Atlantic	Canary Islands	Lanzarote	Georoc 2020	[868]	29	29	-13.6	-13.6	s_14	Basalt, Olivine-Augite		VOLCANIC ROCK	WR [868]	47.1	2.01		13.5			2.81	7.74		11.92	9.19	0.14		0.8	2.94	0.59	0.9				0.05												15292
Atlantic	Canary Islands	Lanzarote	Georoc 2020	[868]	29	29	-13.6	-13.6	s_15	Basalt		VOLCANIC ROCK	WR [868]	44.35	2.55		12.63			4.97	6.65		11.07	12	0.2		1.25	3.17	0.95	0.18				0												15293
Atlantic	Canary Islands	Lanzarote	Georoc 2020	[868]	29	29	-13.6	-13.6	s_16	Basalt, Olivine-Augite		VOLCANIC ROCK	WR [868]	44.3	2.46		11.95			4.32	6.87		10.48	13.27	0.15		1.34	3.28	0.85	0.28																15294
Atlantic	Canary Islands	Lanzarote / Nuevo	Georoc 2020	[868]	29	29	-13.6	-13.6	s_17	Basalt, Olivine-Augite		VOLCANIC ROCK	WR [868]	44	2.48		12.21			2.9	8.48		10.68	12.62	0.15		1.38	3.34	0.92	0.17				0.05												15295
Atlantic	Canary Islands	Lanzarote	Georoc 2020	[868]	29	29	-13.6	-13.6	s_18	Oceanite		VOLCANIC ROCK	WR [868]	43.95	2.28		11.63			2.08	9.02		10.55	14.54	0.15		1.3	3.09	0.86	0.18				0												15296
Atlantic	Canary Islands	Lanzarote / Nuevo	Georoc 2020	[868]	29	29	-13.6	-13.6	s_19	Basalt		VOLCANIC ROCK	WR [868]	42.4	3.37		11.15			4.88	9		11.1	13.1			1.34	3.26		0.35																15297
Atlantic	Canary Islands	Gran Canaria / Los Patchos Formation	Georoc 2020	[1294]	28	28	-15.6	-15.6	s_26.694	Melilitite, Olivine		VOLCANIC ROCK	WR [1294]	35.5	3.57		9.66			6.45	7.14		15.35	13.86	0.31		1.1	2.38	2.07		2.16						0.09									15454
Atlantic	Canary Islands	Gran Canaria / Los Patchos Formation	Georoc 2020	[1294]	28	28	-15.6	-15.6	s_28.116	Melilitite, Olivine		VOLCANIC ROCK	WR [1294]	35.9	3.57		9.45			5.79	7.55		15.09	14.27	0.23		1.06	2.75	2.1		1.65						0.09									15455
Atlantic	Canary Islands	Gran Canaria / Los Patchos Formation	Georoc 2020	[1294]	28	28	-15.6	-15.6	s_26.695	Melilitite, Olivine		VOLCANIC ROCK	WR [1294]	36.3	3.62		9.96			6.5	7.19		12.5	14.42	0.23		1.2	2.84	2.17		2.68						0.12									15456
Atlantic	Canary Islands	Lanzarote / Corona/Los Helechos	Georoc 2020	[6665]	29.1814	29.1814	-13.45	-13.45	s_EL15	Not Given		VOLCANIC ROCK	WR [6665]	47.97	2.48		13.22					11.12	10.08	10.12	0.17		0.83	3.38	0.61	0.15				0.04												158278
Atlantic	Canary Islands	Lanzarote / Corona/Los Helechos	Georoc 2020	[6665]	29.1814	29.1814	-13.45	-13.45	s_EL18	Not Given		VOLCANIC ROCK	WR [6665]	46.62	2.68		12.9					11.24	10.23	11.17	0.18		0.99	3.35	0.64	0.13				0.05												158280
Atlantic	Canary Islands	Lanzarote / Corona/Los Helechos	Georoc 2020	[6665]	29.1814	29.1814	-13.45	-13.45	s_EL21	Not Given		VOLCANIC ROCK	WR [6665]	46.07	2.72		12.42					11.38	10.44	11.75	0.18		1.05	3.24	0.72	0.24				0.02												158281
Atlantic	Canary Islands	Lanzarote / Corona/Los Helechos	Georoc 2020	[6665]	29.1814	29.1814	-13.45	-13.45	s_EL20	Not Given		VOLCANIC ROCK	WR [6665]	44.54	3.08		12.41					11.97	10.24	12.3	0.19		1.26	3.29	0.72	0.37				0.03												158282
Atlantic	Canary Islands	Lanzarote / Corona/Los Helechos	Georoc 2020	[6665]	29.1814	29.1814	-13.45	-13.45	s_EL23	Not Given		VOLCANIC ROCK	WR [6665]	45.72	3.03		12.98					11.59	10.76	10.38	0.18		1.14	3.49	0.73	0.15				0.02												158283
Atlantic	Canary Islands	Fuerteventura / Los Olivos	Georoc 2020	[6665]	28	28.75	-13.8	-14.5	s_KFS240	Not Given		VOLCANIC ROCK	WR [6665]	41.94	3.38		11.63					12.78	11.19	13.09	0.2		1.48	3.28	1.01	0.35				0.1												158286
Atlantic	Canary Islands	Fuerteventura / Los Olivos	Georoc 2020	[6665]	28	28.75	-13.8	-14.5	s_EF10	Basalt, Alkaline		VOLCANIC ROCK	WR [6665]	45.07	3.29		12.17					11.94	10.82	11.4	0.18		1.28	3.18	0.65	0.28				0.03												158287
Atlantic	Canary Islands	Fuerteventura / Basalt Series Iv	Georoc 2020	[6665]	28	28.75	-13.8	-14.5	s_EF9	Tholeiite, Transitional		VOLCANIC ROCK	WR [6665]	49.64	2.43		13.46					10.92	9.39	9.56	0.16		0.68	3.33	0.41	0.21				0.03												158289
Atlantic	Canary Islands	Gran Canaria / El Sao	Georoc 2020	[6665]	28	28	-15.47	-15.47	s_EGC7	Not Given		VOLCANIC ROCK	WR [6665]	42.68	3.72		11.51					11.43	11.93	13.44	0.17		1.49	2.89	0.72	0.67				0.03												158292
Atlantic	Canary Islands	Tenerife / Recent Series	Georoc 2020	[6665]	28.3	28.3	-16.6	-16.6	s_ET7	Not Given		VOLCANIC ROCK	WR [6665]	46.18	2.93		13.64					11.46	9.73	9.41	0.18		1.71	4.13	0.6	0.23				0.03												158297
Atlantic	Canary Islands	Tenerife / Las Canadas Caldera	Georoc 2020	[6665]	28.3	28.3	-16.6	-16.6	s_ET1577	Not Given		VOLCANIC ROCK	WR [6665]	44.9	3.89		16.69					11.62	10.56	5.28	0.19		1.69	4.26	0.91	0.16				0.04												158300
Atlantic	Canary Islands	Tenerife / Recent Series	Georoc 2020	[6665]	28.3	28.3	-16.6	-16.6	s_ET28	Not Given		VOLCANIC ROCK	WR [6665]	56.28	1.79		18.16					5.78	3.94	2.02	0.17		4.02	7.26	0.56	0.16				0.03												158301
Atlantic	Canary Islands	La Palma / Cumbre Vieja	Georoc 2020	[6665]	28.5	28.5	-18	-18	s_LP261925A	Basalt, Olivine		VOLCANIC ROCK	WR [6665]	43.89	3.48		11.66					12.38	11.13	12.06	0.2		1.28	3.21	0.7	0.19				0.04												158302
Atlantic	Canary Islands	La Palma / Cumbre Vieja	Georoc 2020	[6665]	28.6422	28.6422	-18.155	-18.155	s_LP124793.1	Basanite		VOLCANIC ROCK	WR [6665]	46.5	3.48		16.2					10.76	9.2	5.32	0.21		2.33	5.09	0.9	0.68				0.1												158305
Atlantic	Canary Islands	La Palma / Cumbre Vieja	Georoc 2020	[6665]	28.6422	28.6422	-18.155	-18.155	s_LP43E	Basanite		VOLCANIC ROCK	WR [6665]	43.45	3.83		13.34					12.3	12.43	8.38	0.2		1.57	3.6	0.89	0				0												158307
Atlantic	Canary Islands	Gran Canaria	Georoc 2020	[6665]	28	28	-15.6	-15.6	s_WHJLP.92.11	Phonotephrite		VOLCANIC ROCK	WR [6665]	50.41	2.38		18.51					7.66	6.99	2.67	0.21		3.21	7.22	0.74	0.23				0.04												158309
Atlantic	Canary Islands	El Hierro	Georoc 2020	[6665]	27.8	27.8	-18	-18	s_EH17	Not Given		VOLCANIC ROCK	WR [6665]	46.6	3.84		16.38					10.63	9.09	5.17	0.19		2.07	4.85	1.17	0.22				0.03												158313
Atlantic	Canary Islands	Lanzarote / Timanfaya Eruption	Georoc 2020	[899]	28.99	28.99	-13.65	-13.65	s_13778	Tholeiite		VOLCANIC ROCK	WR [899]	50										9.68																						16042
Atlantic	Canary Islands	Lanzarote / Tao	Georoc 2020	[899]	29.1	29.1	-13.62	-13.62	s_12913	Basanite		VOLCANIC ROCK	WR [899]	44.3										13.3																						16044
Atlantic	Canary Islands	Lanzarote / Tao	Georoc 2020	[899]	29.02	29.02	-13.75	-13.75	s_13537	Basanite		VOLCANIC ROCK	WR [899]	44										14.5																						16045
Atlantic	Canary Islands	Tenerife / Pico Teide	Georoc 2020	[899]	28.31	28.31	-16.63	-16.63	s_34218	Phonolite		VOLCANIC ROCK	WR [899]	58.6										1.31																						16047
Atlantic	Canary Islands	Tenerife / Pico Teide	Georoc 2020	[899]	28.27	28.27	-16.72	-16.72	s_70658	Tephrite		VOLCANIC ROCK	WR [899]	47										4.9																						16048
Atlantic	Canary Islands	Tenerife / Pico Teide	Georoc 2020	[899]	28.39	28.39	-16.55	-16.55	s_22880	Phonolite		VOLCANIC ROCK	WR [899]	56.2										1.88																						16049
Atlantic	Canary Islands	Tenerife / Pico Teide	Georoc 2020	[899]	28.27	28.27	-16.52	-16.52	s_70682	Basanite		VOLCANIC ROCK	WR [899]	43.2										8.22																						16050
Atlantic	Canary Islands	Tenerife / Pico Teide	Georoc 2020	[899]	28.33	28.33	-16.76	-16.76	s_21436	Tephrite		VOLCANIC ROCK	WR [899]	47.7										5.51																						16051
Atlantic	Canary Islands	Tenerife / Pico Teide	Georoc 2020	[899]	28.36	28.36	-16.76	-16.76	s_21818	Tephrite		VOLCANIC ROCK	WR [899]	48.4										5.19																						16052
Atlantic	Canary Islands	Tenerife / Pico Teide	Georoc 2020	[899]	28.36	28.36	-16.77	-16.77	s_21875	Tephrite		VOLCANIC ROCK	WR [899]	47.9										4.5																						16053
Atlantic	Canary Islands	Tenerife / Pico Teide	Georoc 2020	[899]	28.24	28.24	-16.7	-16.7	s_34152	Tephrite		VOLCANIC ROCK	WR [899]	47.8										6.08																						16054
Atlantic	Canary Islands	Tenerife / Pico Teide	Georoc 2020	[899]	28.3	28.3	-16.77	-16.77	s_21509	Tephrite		VOLCANIC ROCK	WR [899]	44.9										6.28																						16055
Atlantic	Canary Islands	La Palma / San Juan	Georoc 2020	[899]	28.5	28.5	-18	-18	s_CLP45	Basanite		VOLCANIC ROCK	WR [899]	45.1										8.61																						16056
Atlantic	Canary Islands	La Palma / San Juan	Georoc 2020	[899]	28.5	28.5	-18	-18	s_CLP22	Tephrite		VOLCANIC ROCK	WR [899]	44.7										7.89																						16057
Atlantic	Canary Islands	La Palma / San Juan	Georoc 2020	[899]	28.5	28.5	-18	-18	s_CLP32	Tephrite		VOLCANIC ROCK	WR [899]	45.1										6.88																						16058
Atlantic	Canary Islands	La Palma / San Juan	Georoc 2020	[899]	28.5	28.5	-18	-18	s_CLP19	Phonolite		VOLCANIC ROCK	WR [899]	46.4										5.26																						16059
Atlantic	Canary Islands	Gran Canaria / Tejeda Caldera / Mogan Formation	Georoc 2020	[903]	28	28	-15.6	-15.6	s_GC101	Pantellerite		VOLCANIC ROCK	WR [903]	66.6	1.07		13.5			5.58			0.43	0.2	0.11		4.35	6.17	0.24					0.01											1.47	16060
Atlantic	Canary Islands	Gran Canaria / Tejeda Caldera / Mogan Formation	Georoc 2020	[903]	28	28	-15.6	-15.6	s_GC102	Pantellerite		VOLCANIC ROCK	WR [903]	65.1	0.76		16.1			3.55			0.43	0.33	0.13		3.86	7.26	0.16																1.54	16061
Atlantic	Canary Islands	Gran Canaria / Tejeda Caldera / Mogan Formation	Georoc 2020	[903]	28	28	-15.6	-15.6	s_GC412	Pantellerite		VOLCANIC ROCK	WR [903]	69.1	0.99		13.2			4.62	0.1		0.26	0.14	0.12		3.72	6.17	0.11		0.8	0.2		0.01											1.47	16062
Atlantic	Canary Islands	Gran Canaria / Tejeda Caldera / Mogan Formation	Georoc 2020	[903]	28	28	-15.6	-15.6	s_GC413	Pantellerite		VOLCANIC ROCK	WR [903]	65	1.08		14.2			5.24	0.1		0.47	0.41	0.21		3.87	6.7	0.19		1.1	0.4													2	16063
Atlantic	Canary Islands	Gran Canaria / Tejeda Caldera / Mogan Formation	Georoc 2020	[903]	28	28	-15.6	-15.6	s_GC103	Not Given		VOLCANIC ROCK	WR [903]	68.5	1.21		10.2			7.91	0.1		0.14	0.15	0.16		4.73	5	0.1		0.9	0.1													1.23	16064
Atlantic	Canary Islands	Gran Canaria / Tejeda Caldera / Mogan Formation	Georoc 2020	[903]	28	28	-15.6	-15.6	s_GC104	Not Given		VOLCANIC ROCK	WR [903]	64.8	1.15		14.6			4.92			0.42	0.28	0.09		4.46	6.68	0.23																1.54	16065
Atlantic	Canary Islands	Gran Canaria / Tejeda Caldera / Mogan Formation	Georoc 2020	[903]	28	28	-15.6	-15.6	s_GC105	Trachyte, Comenditic		VOLCANIC ROCK	WR [903]	63.7	0.94		16.1			4.21	0.3		0.45	0.54	0.18		4.94	6.74	0.15		0.7	0.2													1.62	16066
Atlantic	Canary Islands	Gran Canaria / Tejeda Caldera / Mogan Formation	Georoc 2020	[903]	28	28	-15.6	-15.6	s_GC111	Trachyte, Comenditic		VOLCANIC ROCK	WR [903]	63.9	0.91		16.1			3.77			0.63	0.55	0.2		4.66	6.98	0.18																1.7	16067
Atlantic	Canary Islands	Gran Canaria / Tejeda Caldera / Mogan Formation	Georoc 2020	[903]	28	28	-15.6	-15.6	s_GC112	Not Given		VOLCANIC ROCK	WR [903]	63.3	1.17		13.1			6.68	0.1		0.29	0.67	0.27		5.2	6.61	0.15		0.5	0.1													1.47	16068
Atlantic	Canary Islands	Gran Canaria / Tejeda Caldera / Mogan Formation	Georoc 2020	[903]	28	28	-15.6	-15.6	s_GC113	Not Given		VOLCANIC ROCK	WR [903]	63.5	1.2		13.5			6.64			0.22	0.36	0.2		5.22	6.11	0.14																1.54	16069
Atlantic	Canary Islands	Gran Canaria / Tejeda Caldera / Mogan Formation	Georoc 2020	[903]	28	28	-15.6	-15.6	s_GC397	Not Given		VOLCANIC ROCK	WR [903]	62.9	1.27		14.5			6.63	0.1		0.14	0.32	0.11		4.46	5.86	0.11		1.6	0.8													2.7	16070
Atlantic	Canary Islands	Gran Canaria / Tejeda Caldera / Mogan Formation	Georoc 2020	[903]	28	28	-15.6	-15.6	s_GC114	Not Given		VOLCANIC ROCK	WR [903]	64.1	1.12		14.2			6.07	0.1		0.2	0.19	0.14		5.33	5.94	0.16		1.2	0.2		0.02											1.7	16071
Atlantic	Canary Islands	Gran Canaria / Tejeda Caldera / Mogan Formation	Georoc 2020	[903]	28	28	-15.6	-15.6	s_GC115	Not Given		VOLCANIC ROCK	WR [903]	64.2	1.08		14.3			5.87			0.24	0.26	0.16		4.99	6.28	0.14																2	16072
Atlantic	Canary Islands	Gran Canaria / Tejeda Caldera / Mogan Formation	Georoc 2020	[903]	28	28	-15.6	-15.6	s_GC116	Trachyte		VOLCANIC ROCK	WR [903]	63.1	0.96		15.4			4.91	0.3		0.35	0.47	0.16		5.04	7.58	0.08		0.6	0.3													1.31	16073
Atlantic	Canary Islands	Gran Canaria / Tejeda Caldera / Mogan Formation	Georoc 2020	[903]	28	28	-15.6	-15.6	s_GC117	Trachyte		VOLCANIC ROCK	WR [903]	62.8	1.03		16.4			5.04			0.33	0.3	0.08		4.82	7.05	0.16																1.62	16074
Atlantic	Canary Islands	Gran Canaria / Tejeda Caldera / Mogan Formation	Georoc 2020	[903]	28	28	-15.6	-15.6	s_GC118	Trachyte, Comenditic		VOLCANIC ROCK	WR [903]	60	1.21		16			5.1			0.71	0.85	0.18		5.06	7.6	0.13																2.7	16075
Atlantic	Canary Islands	Gran Canaria / Tejeda Caldera / Mogan Formation	Georoc 2020	[903]	28	28	-15.6	-15.6	s_GC356	Pantellerite		VOLCANIC ROCK	WR [903]	73	0.86		10.2			5.84			0.01	0.2	0.1		4.99	3.8	0.07		0.7	0.1													0.93	16076
Atlantic	Canary Islands	Gran Canaria / Tejeda Caldera / Mogan Formation	Georoc 2020	[903]	28	28	-15.6	-15.6	s_GC357	Pantellerite		VOLCANIC ROCK	WR [903]	67.9	1.07		11.9			5.97	0.1		0.17	0.74	0.05		4.84	5.04	0.1		1	0.4													2	16077
Atlantic	Canary Islands	Gran Canaria / Tejeda Caldera / Mogan Formation	Georoc 2020	[903]	28	28	-15.6	-15.6	s_GC358	Pantellerite		VOLCANIC ROCK	WR [903]	69	1.09		10.5			7.3			0.04	0.22	0.15		5.2	4.42	0.08		0.7	0.2													1.7	16078
Atlantic	Canary Islands	Gran Canaria / Tejeda Caldera / Mogan Formation	Georoc 2020	[903]	28	28	-15.6	-15.6	s_GC360	Pantellerite		VOLCANIC ROCK	WR [903]	68.5	1.23		10.8			7.76	0.1		0.11	0.21	0.38		5.28	4.36	0.1		0.7	0.3													1.31	16079
Atlantic	Canary Islands	Gran Canaria / Tejeda Caldera / Mogan Formation	Georoc 2020	[903]	28	28	-15.6	-15.6	s_GC361	Pantellerite		VOLCANIC ROCK	WR [903]	69.9	1.06		9.87			7.03			0.16	0.33	0.18		4.66	4.74	0.09		0.5	0.2													1.7	16080
Atlantic	Canary Islands	Gran Canaria / Tejeda Caldera / Mogan Formation	Georoc 2020	[903]	28	28	-15.6	-15.6	s_GC362	Pantellerite		VOLCANIC ROCK	WR [903]	68.6	1.06		10			7.19	0.2		0.09	0.2	0.16		4.77	4.76	0.99		0.6	0.2													2.77	16081
Atlantic	Canary Islands	Gran Canaria / Tejeda Caldera / Mogan Formation	Georoc 2020	[903]	28	28	-15.6	-15.6	s_GC344	Pantellerite		VOLCANIC ROCK	WR [903]	69.2	1.14		10.6			7.11			0.07	0.22	0.26		5	4.72	0.09		0.5	0.1													1.16	16082
Atlantic	Canary Islands	Gran Canaria / Tejeda Caldera / Mogan Formation	Georoc 2020	[903]	28	28	-15.6	-15.6	s_GC345	Pantellerite		VOLCANIC ROCK	WR [903]	72.2	0.92		9.17			6.25	0.1		0.12	0.23	0.16		3.99	4.27	0.09		0.8	0.3		0.01											1.77	16083
Atlantic	Canary Islands	Gran Canaria / Tejeda Caldera / Mogan Formation	Georoc 2020	[903]	28	28	-15.6	-15.6	s_GC347	Pantellerite		VOLCANIC ROCK	WR [903]	69.9	1.02		10.4			7.17	0.1		0.12	0.3	0.2		4.76	4.68	0.1		0.7	0.2													1.16	16084
Atlantic	Canary Islands	Gran Canaria / Tejeda Caldera / Mogan Formation	Georoc 2020	[903]	28	28	-15.6	-15.6	s_GC349	Not Given		VOLCANIC ROCK	WR [903]	65.8	1.11		13.5			5.6			0.27	0.4	0.05		4.46	6.21	0.19		0.8	0.4													1.7	16085
Atlantic	Canary Islands	Gran Canaria / Tejeda Caldera / Mogan Formation	Georoc 2020	[903]	28	28	-15.6	-15.6	s_GC351	Not Given		VOLCANIC ROCK	WR [903]	66.5	1.03		14.6			4.68	0.1		0.4	0.2	0.06		3.65	6.51	0.16		0.9	0.4													1.62	16086
Atlantic	Canary Islands	Gran Canaria / Tejeda Caldera / Mogan Formation	Georoc 2020	[903]	28	28	-15.6	-15.6	s_GC363	Pantellerite		VOLCANIC ROCK	WR [903]	66.1	1.21		12.1			7.09			0.58	0.25	0.13		5.34	5.06	0.41		0.6	0.2		0.01											1.08	16087
Atlantic	Canary Islands	Gran Canaria / Tejeda Caldera / Mogan Formation	Georoc 2020	[903]	28	28	-15.6	-15.6	s_GC364	Pantellerite		VOLCANIC ROCK	WR [903]	66.2	1.22		11.1			8.03	0.2		0.19	0.51	0.26		5.12	5.44	0.1		0.9	0.3													1.7	16088
Atlantic	Canary Islands	Gran Canaria / Tejeda Caldera / Mogan Formation	Georoc 2020	[903]	28	28	-15.6	-15.6	s_GC367	Trachyte, Comenditic		VOLCANIC ROCK	WR [903]	65.8	0.89		15.7			3.69			0.25	0.35	0.07		4.92	6.37	0.14		0.9	0.2													1.39	16089
Atlantic	Canary Islands	Gran Canaria / Tejeda Caldera / Mogan Formation	Georoc 2020	[903]	28	28	-15.6	-15.6	s_GC368	Trachyte, Comenditic		VOLCANIC ROCK	WR [903]	64	0.95		16.3			4.04	0.2		0.7	0.42	0.24		4.98	7.11	0.18		0.4	0.2													0.93	16090
Atlantic	Canary Islands	Gran Canaria / Tejeda Caldera / Mogan Formation	Georoc 2020	[903]	28	28	-15.6	-15.6	s_GC369	Not Given		VOLCANIC ROCK	WR [903]	65.5	1.14		12.1			6.53			0.2	0.56	0.26		4.9	5.94	0.09		0.8	0.2													2	16091
Atlantic	Canary Islands	Gran Canaria / Tejeda Caldera / Mogan Formation	Georoc 2020	[903]	28	28	-15.6	-15.6	s_GC370	Not Given		VOLCANIC ROCK	WR [903]	63.3	1.12		13.2			6.45	0.8		0.47	0.85	0.3		5.15	6.41	0.13		0.9	0.5		0.01											2.31	16092
Atlantic	Canary Islands	Gran Canaria / Tejeda Caldera / Mogan Formation	Georoc 2020	[903]	28	28	-15.6	-15.6	s_GC371	Not Given		VOLCANIC ROCK	WR [903]	62.7	1.34		14.6			6.64	0.3		0.37	0.68	0.13		4.55	6.9	0.17		0.9	0.3													1.31	16093
Atlantic	Canary Islands	Gran Canaria / Tejeda Caldera / Mogan Formation	Georoc 2020	[903]	28	28	-15.6	-15.6	s_GC372	Not Given		VOLCANIC ROCK	WR [903]	70	1.08		11.3			5.41			0.39	0.64	0.31		3.53	5.84	0.11		0.9	0.5													1.54	16094
Atlantic	Canary Islands	Gran Canaria / Tejeda Caldera / Mogan Formation	Georoc 2020	[903]	28	28	-15.6	-15.6	s_GC373	Trachyte, Comenditic		VOLCANIC ROCK	WR [903]	63	1.02		15.5			4.62	0.6		0.46	0.8	0.13		5.3	7.06	0.16		0.8	0.2													1.23	16095
Atlantic	Canary Islands	Gran Canaria / Tejeda Caldera / Mogan Formation	Georoc 2020	[903]	28	28	-15.6	-15.6	s_GC374	Trachyte, Comenditic		VOLCANIC ROCK	WR [903]	63	0.94		16.7			3.86			0.49	0.6	0.19		5.29	7.36	0.12		0.5	0.2													0.85	16096
Atlantic	Canary Islands	Gran Canaria / Tejeda Caldera / Mogan Formation	Georoc 2020	[903]	28	28	-15.6	-15.6	s_GC375	Trachyte, Comenditic		VOLCANIC ROCK	WR [903]	63.2	0.97		15.3			4.87	0.3		0.38	0.7	0.21		5.04	7.92	0.07		0.5	0.1													0.93	16097
Atlantic	Canary Islands	Gran Canaria / Tejeda Caldera / Mogan Formation	Georoc 2020	[903]	28	28	-15.6	-15.6	s_GC376	Trachyte, Comenditic		VOLCANIC ROCK	WR [903]	63.7	1.02		16.5			4.27			0.52	0.49	0.18		4.52	7.72	0.06		0.3	0.1													0.77	16098
Atlantic	Canary Islands	Gran Canaria / Tejeda Caldera / Fataga Formation	Georoc 2020	[903]	28	28	-15.6	-15.6	s_GC378	Trachyte		VOLCANIC ROCK	WR [903]	61.6	1.14		16.1			5.08	0.3		0.51	0.96	0.14		5.08	6.72	0.06		2	0.7													2.7	16099
Atlantic	Canary Islands	Gran Canaria / Tejeda Caldera / Fataga Formation	Georoc 2020	[903]	28	28	-15.6	-15.6	s_GC460	Trachyte		VOLCANIC ROCK	WR [903]	60.8	1.15		16.2			5.18	0.4		0.51	0.85	0.16		5.27	6.72	0.06		1.2	0.8		0.01											2.31	16100
Atlantic	Canary Islands	Gran Canaria / Tejeda Caldera / Fataga Formation	Georoc 2020	[903]	28	28	-15.6	-15.6	s_GC461	Trachyte		VOLCANIC ROCK	WR [903]	61.7	1.17		16			4.94	0.1		0.69	1.06	0.22		4.83	6.86	0.07		1.1	0.8													2.31	16101
Atlantic	Canary Islands	Gran Canaria / Tejeda Caldera / Fataga Formation	Georoc 2020	[903]	28	28	-15.6	-15.6	s_GC377	Trachyte		VOLCANIC ROCK	WR [903]	60.9	1.15		14.9			6.17	0.1		0.56	0.73	0.39		5.71	6.76	0.07		1.7	0.4		0.03											2.31	16102
Atlantic	Canary Islands	Gran Canaria / Tejeda Caldera / Fataga Formation	Georoc 2020	[903]	28	28	-15.6	-15.6	s_GC463	Trachyte		VOLCANIC ROCK	WR [903]	59.7	0.96		16.1			5.25	0.1		0.58	0.55	0.41		5.59	7.26	0.08		2	0.7													3.08	16103
Atlantic	Canary Islands	Gran Canaria / Tejeda Caldera / Fataga Formation	Georoc 2020	[903]	28	28	-15.6	-15.6	s_GC465	Trachyte		VOLCANIC ROCK	WR [903]	62.5	0.97		17.1			4.05	0.1		0.51	0.67	0.22		5.75	7.03	0.06		0.5	0.2													0.85	16104
Atlantic	Canary Islands	Gran Canaria / Tejeda Caldera / Fataga Formation	Georoc 2020	[903]	28	28	-15.6	-15.6	s_GC464	Trachyte, Comenditic		VOLCANIC ROCK	WR [903]	61.4	1.21		14.8			6.39			0.4	0.66	0.32		6.25	6.55	0.07		1.1	0.2													1.54	16105
Atlantic	Canary Islands	Gran Canaria / Tejeda Caldera / Fataga Formation	Georoc 2020	[903]	28	28	-15.6	-15.6	s_GC466	Trachyte, Comenditic		VOLCANIC ROCK	WR [903]	61.4	1.11		15.4			5.65	0.3		0.57	0.76	0.19		5.41	6.94	0.05		1.1	0.6													1.62	16106
Atlantic	Canary Islands	Gran Canaria / Tejeda Caldera / Fataga Formation	Georoc 2020	[903]	28	28	-15.6	-15.6	s_GC467	Trachyte		VOLCANIC ROCK	WR [903]	62.7	0.96		16.8			3.92	0.1		0.57	0.77	0.2		6.02	6.42	0.09		1	0.2													1.54	16107
Atlantic	Canary Islands	Gran Canaria / Tejeda Caldera / Fataga Formation	Georoc 2020	[903]	28	28	-15.6	-15.6	s_GC468	Trachyte		VOLCANIC ROCK	WR [903]	59.6	1.26		15.1			6.35	0.4		0.85	0.83	0.18		5.73	6.24	0.06		1.6	0.6													3.31	16108
Atlantic	Canary Islands	Gran Canaria / Tejeda Caldera	Georoc 2020	[903]	28	28	-15.6	-15.6	s_GC354	Pantellerite		VOLCANIC ROCK	WR [903]	70.4	0.5		10.6			3.65	0.5		1.53	0.98	0.13		4.31	4.95	0.06		0.3			1.97											2.47	16109
Atlantic	Canary Islands	Gran Canaria / Tejeda Caldera	Georoc 2020	[903]	28	28	-15.6	-15.6	s_GC355	Pantellerite		VOLCANIC ROCK	WR [903]	73.9	0.54		9.98			3.5	0.3		0.45	0.38	0.13		3.66	4.89	0.07		0.3	0.1		0.4											0.93	16110
Atlantic	Canary Islands	Gran Canaria / Tejeda Caldera	Georoc 2020	[903]	28	28	-15.6	-15.6	s_GC485	Pantellerite		VOLCANIC ROCK	WR [903]	70.5	0.61		14.2			2.69	0.6		1	0.53	0.15		3.1	6.67	0.12		0.1			0.01											0.39	16111
Atlantic	Canary Islands	Gran Canaria / Tejeda Caldera	Georoc 2020	[903]	28	28	-15.6	-15.6	s_GC487	Pantellerite		VOLCANIC ROCK	WR [903]	74.9	0.52		9.82			3.43	0.3		0.18	0.25	0.12		3.79	4.97	0.07		0.4	0.1		0.01											0.7	16112
Atlantic	Canary Islands	Gran Canaria / Tejeda Caldera	Georoc 2020	[903]	28	28	-15.6	-15.6	s_GC488	Pantellerite		VOLCANIC ROCK	WR [903]	66.8	1.01		11.6			6.44	0.9		0.67	0.76	0.14		4.44	6.59	0.12		0.4			0.57											1	16113
Atlantic	Canary Islands	Gran Canaria / Tejeda Caldera	Georoc 2020	[903]	28	28	-15.6	-15.6	s_GC489	Pantellerite		VOLCANIC ROCK	WR [903]	69.6	0.97		9.52			6.78	0.3		0.16	0.34	0.17		4.33	5.85	0.07		0.4	0.1													0.7	16114
Atlantic	Canary Islands	Gran Canaria / Tejeda Caldera	Georoc 2020	[903]	28	28	-15.6	-15.6	s_540.2	Pantellerite		VOLCANIC ROCK	WR [903]	66	0.99		12.2			5.98	0.6		0.66	1	0.32		4.5	6.62	0.1		0.6	0.1		0.3											1.54	16115
Atlantic	Canary Islands	Gran Canaria / Tejeda Caldera	Georoc 2020	[903]	28	28	-15.6	-15.6	s_540.3	Pantellerite		VOLCANIC ROCK	WR [903]	66.3	1.03		11.8			6.33	0.5		0.4	0.65	0.28		4.74	6.4	0.08		0.5	0.2		0.02											1.08	16116
Atlantic	Canary Islands	Gran Canaria / Tejeda Caldera	Georoc 2020	[903]	28	28	-15.6	-15.6	s_540.4	Pantellerite		VOLCANIC ROCK	WR [903]	66.6	1		12.4			6.1	0.2		0.24	0.65	0.31		4.37	6.38	0.08		0.6	0.1													0.93	16117
Atlantic	Canary Islands	Gran Canaria / Tejeda Caldera	Georoc 2020	[903]	28	28	-15.6	-15.6	s_540.5	Pantellerite		VOLCANIC ROCK	WR [903]	64.2	1.03		12.2			6.55	0.2		0.49	0.77	0.42		5.26	6.32	0.07		0.4	0.1		0.24											0.93	16118
Atlantic	Canary Islands	Fuerteventura	Georoc 2020	[23264]	28.4	28.4	-14	-14	s_H1	Basalt		VOLCANIC ROCK	WR [23264]	45.2673	3.74531		15.2558	0.0294135				10.77	10.3339	5.62778	0.166676	0.00980449	1.28439	3.13744	0.882404																1.95	1615618
Atlantic	Canary Islands	Fuerteventura	Georoc 2020	[23264]	28.4	28.4	-14	-14	s_H2	Basalt		VOLCANIC ROCK	WR [23264]	43.8315	2.62719		13.4354	0.0579526				11.69	11.8513	7.13783	0.173858	0.0193175	0.62782	2.60787	0.424986																3.38397	1615619
Atlantic	Canary Islands	Fuerteventura	Georoc 2020	[23264]	28.4	28.4	-14	-14	s_H3	Trachyte		VOLCANIC ROCK	WR [23264]	65.4027	0.547595		16.7863	0				2.22	0.527682	0.647157	0.0896064	0	5.3266	6.99926	0.0896064																0.434339	1615620
Atlantic	Canary Islands	Fuerteventura	Georoc 2020	[23264]	28.4	28.4	-14	-14	s_PN1	Basanite		VOLCANIC ROCK	WR [23264]	41.8986	3.99129		11.5172	0.0893573				13.01	10.0676	12.7682	0.178715	0.0397143	1.09214	2.20415	0.496429																0.710648	1615621
Atlantic	Canary Islands	Fuerteventura	Georoc 2020	[23264]	28.4	28.4	-14	-14	s_PN2	Basalt		VOLCANIC ROCK	WR [23264]	49.505	2.37305		13.1016	0.0598247				11.36	9.8312	8.74438	0.159533	0.0299124	0.418773	2.5924	0.239299																0.292032	1615622
Atlantic	Canary Islands	Fuerteventura	Georoc 2020	[23264]	28.4	28.4	-14	-14	s_PN3	Basalt		VOLCANIC ROCK	WR [23264]	44.9587	2.82922		11.5958	0.0697342				12.47	9.8126	12.4326	0.179317	0.0498102	1.04601	2.51043	0.368595																0.38	1615623
Atlantic	Canary Islands	Fuerteventura	Georoc 2020	[23264]	28.4	28.4	-14	-14	s_MH1	Trachybasalt		VOLCANIC ROCK	WR [23264]	49.9238	2.82644		17.1391	0.110251				8.91	8.76999	3.98909	0.200457	0.060137	2.23509	3.90891	0.892033																-0.22779	1615624
Atlantic	Canary Islands	Fuerteventura	Georoc 2020	[23264]	28.4	28.4	-14	-14	s_MH2	Trachyandesite, Basaltic		VOLCANIC ROCK	WR [23264]	50.3087	2.85276		16.8663	0.110107				8.99	7.59735	3.46335	0.210203	0.0600581	2.73264	4.35421	1.06103																-0.0963679	1615625
Atlantic	Canary Islands	Fuerteventura	Georoc 2020	[23264]	28.4	28.4	-14	-14	s_C1	Trachybasalt		VOLCANIC ROCK	WR [23264]	48.6008	3.62767		15.0474	0.0695717				11.65	8.32873	4.39296	0.218654	0.0397553	2.1766	3.66742	1.28211																-0.48277	1615626
Atlantic	Canary Islands	Fuerteventura	Georoc 2020	[23264]	28.4	28.4	-14	-14	s_C2	Trachybasalt		VOLCANIC ROCK	WR [23264]	49.3922	3.45316		15.3297	0.0698617				10.95	8.26364	3.95218	0.199605	0.039921	1.88627	3.97214	0.82836																0.197057	1615627
Atlantic	Canary Islands	Fuerteventura	Georoc 2020	[23264]	28.4	28.4	-14	-14	s_C3	Basalt		VOLCANIC ROCK	WR [23264]	45.2567	4.68554		14.2678	0.100548				13.22	10.7285	5.80163	0.201096	0.0502741	1.21663	2.66453	0.673673																-0.546992	1615628
Atlantic	Canary Islands	Fuerteventura	Georoc 2020	[23264]	28.4	28.4	-14	-14	s_C4	Basalt		VOLCANIC ROCK	WR [23264]	44.792	4.11477		12.915	0.100116				13.57	11.8738	6.87798	0.190221	0.0500581	0.971127	2.47287	0.490569																-0.115948	1615629
Atlantic	Canary Islands	Fuerteventura / Basal Complex	Georoc 2020	[6880]	28.4	28.4	-14	-14	s_96/54	Basanite		VOLCANIC ROCK	WR [6880]	44.17	5.11		11.54			7.47	5.42		10.51	7.55	0.17		1.17	3.15	1.02	2.11															2.16	165126
Atlantic	Canary Islands	Fuerteventura / Basal Complex	Georoc 2020	[6880]	28.4	28.4	-14	-14	s_96/62	Basanite		VOLCANIC ROCK	WR [6880]	45.85	3.07		17.01			5.84	3.22		10.87	3.96	0.17		2.08	3.9	0.67	1.89															2.4	165127
Atlantic	Canary Islands	Fuerteventura / Basal Complex	Georoc 2020	[6880]	28.4	28.4	-14	-14	s_97/20	Basanite		VOLCANIC ROCK	WR [6880]	44.61	4.13		12.06			6.7	5.61		9.9	8.25	0.19		3.12	2.35	0.95	1.86															1.93	165128
Atlantic	Canary Islands	Fuerteventura / Basal Complex	Georoc 2020	[6880]	28.4	28.4	-14	-14	s_97/23	Basanite		VOLCANIC ROCK	WR [6880]	41.97	4.8		12.07			7.77	6		11.41	8.66	0.18		1.17	2.52	0.92	2.42															2.36	165129
Atlantic	Canary Islands	Fuerteventura / Basal Complex	Georoc 2020	[6880]	28.4	28.4	-14	-14	s_97/24	Basanite		VOLCANIC ROCK	WR [6880]	43.06	5.24		11.55			8.12	6.18		9.88	7.55	0.19		1.25	3.15	0.98	2.21															2.04	165130
Atlantic	Canary Islands	Fuerteventura / Basal Complex	Georoc 2020	[6880]	28.4	28.4	-14	-14	s_97/25	Basanite		VOLCANIC ROCK	WR [6880]	37.81	5.48		11.53			7.27	7.83		9.01	11.11	0.17		3.16	1.56	0.99	3.78															3.79	165131
Atlantic	Canary Islands	El Hierro	Georoc 2020	[939]	27.75	27.75	-17.93	-17.93	s_1	Basalt	Glassy, Highly Vesicular [939]	VOLCANIC ROCK	WR [939]	42.55	5.63		13.9					12.85	12.29	5.26	0.17	0.05	1.31	2.61	1.14							0.08	0.08									16831
Atlantic	Canary Islands	Gran Canaria / Shield Stage / Guigui/Hogarzales Formations	Georoc 2020	[856]	28	28	-15.6	-15.6	s_E1	Basalt		VOLCANIC ROCK	WR [856]	46.96	3.2		10.8					11.81	9.98	12.25	0.195		0.775	2.05	0.362																1.57	16885
Atlantic	Canary Islands	Gran Canaria / Shield Stage / Guigui/Hogarzales Formations	Georoc 2020	[856]	28	28	-15.6	-15.6	s_E2	Basalt		VOLCANIC ROCK	WR [856]	46.74	4.18		14.16					11.75	10.12	6.82	0.187		0.743	3.07	0.386																-0.39	16886
Atlantic	Canary Islands	Gran Canaria / Shield Stage / Guigui/Hogarzales Formations	Georoc 2020	[856]	28	28	-15.6	-15.6	s_E3	Basalt		VOLCANIC ROCK	WR [856]	47.25	3.48		11.12					11.45	9.65	11.64	0.184		0.812	2.27	0.39																1.11	16887
Atlantic	Canary Islands	Gran Canaria / Guigui/Hogarzales Formations / Shield Stage	Georoc 2020	[856]	28	28	-15.6	-15.6	s_E5	Basalt		VOLCANIC ROCK	WR [856]	47.69	3.33		11.01					11.36	10.73	10.95	0.272		0.3	2.03	0.38																2.18	16888
Atlantic	Canary Islands	Gran Canaria / Shield Stage / Guigui/Hogarzales Formations	Georoc 2020	[856]	28	28	-15.6	-15.6	s_E6	Basalt		VOLCANIC ROCK	WR [856]	47.41	3.47		11.15					11.65	9.64	11.64	0.178		0.815	2.3	0.391																1.46	16889
Atlantic	Canary Islands	Gran Canaria / Shield Stage / Guigui/Hogarzales Formations	Georoc 2020	[856]	28	28	-15.6	-15.6	s_E7	Basalt		VOLCANIC ROCK	WR [856]	46.8	3.33		11.02					11.89	9.82	11.9	0.189		0.886	2.32	0.402																1.68	16890
Atlantic	Canary Islands	Gran Canaria / Shield Stage / Guigui/Hogarzales Formations	Georoc 2020	[856]	28	28	-15.6	-15.6	s_E8	Basalt		VOLCANIC ROCK	WR [856]	46.48	3.18		10.62					11.94	9.37	13	0.179		0.804	2.08	0.357																0.68	16891
Atlantic	Canary Islands	Gran Canaria / Guigui/Hogarzales Formations / Shield Stage	Georoc 2020	[856]	28	28	-15.6	-15.6	s_E9	Basalt		VOLCANIC ROCK	WR [856]	46.19	2.86		9.35					12.28	7.99	16.75	0.165		0.666	2.08	0.334																0.89	16892
Atlantic	Canary Islands	Gran Canaria / Shield Stage / Guigui/Hogarzales Formations	Georoc 2020	[856]	28	28	-15.6	-15.6	s_E10	Basalt		VOLCANIC ROCK	WR [856]	48.09	4.38		14.9					11.11	8.9	5.67	0.213		1.208	3.19	0.442																0.5	16893
Atlantic	Canary Islands	Gran Canaria / Shield Stage / Guigui/Hogarzales Formations	Georoc 2020	[856]	28	28	-15.6	-15.6	s_E11	Basalt		VOLCANIC ROCK	WR [856]	47.47	4.38		13.97					11.73	9.27	6.45	0.219		1.287	2.98	0.493																0.91	16894
Atlantic	Canary Islands	Gran Canaria / Shield Stage / Guigui/Hogarzales Formations	Georoc 2020	[856]	28	28	-15.6	-15.6	s_E12_LEACHED	Basalt		VOLCANIC ROCK	WR [856]	50.03	4.19		13.97					9.74	9.63	5.7	0.176		0.941	3.25	0.475																1.42	16895
Atlantic	Canary Islands	Gran Canaria / Guigui/Hogarzales Formations / Shield Stage	Georoc 2020	[856]	28	28	-15.6	-15.6	s_E13	Basalt		VOLCANIC ROCK	WR [856]	50.07	4.19		14.23					10.01	9.25	4.91	0.189		1.146	3.65	0.514																0.8	16896
Atlantic	Canary Islands	Gran Canaria / Shield Stage / Guigui/Hogarzales Formations	Georoc 2020	[856]	28	28	-15.6	-15.6	s_E15	Basalt		VOLCANIC ROCK	WR [856]	47.69	3.5		12.16					11.82	12.23	7.31	0.185		0.757	2.55	0.389																10.1	16897
Atlantic	Canary Islands	Gran Canaria / Shield Stage / Guigui/Hogarzales Formations	Georoc 2020	[856]	28	28	-15.6	-15.6	s_E16	Basalt		VOLCANIC ROCK	WR [856]	47.32	3.8		13.05					11.36	11.42	6.76	0.18		0.939	2.78	0.424																0.5	16898
Atlantic	Canary Islands	Gran Canaria / Shield Stage / Guigui/Hogarzales Formations	Georoc 2020	[856]	28	28	-15.6	-15.6	s_RG16	Basalt		VOLCANIC ROCK	WR [856]	47.89	3.57		12.08					11.43	11.55	8.31	0.177		0.819	2.54	0.381																1.29	16899
Atlantic	Canary Islands	Gran Canaria / Guigui/Hogarzales Formations / Shield Stage	Georoc 2020	[856]	28	28	-15.6	-15.6	s_RG17	Basalt		VOLCANIC ROCK	WR [856]	48.18	3.96		14.04					11.83	9.61	5.86	0.221		1.749	3.12	0.498																1.27	16900
Atlantic	Canary Islands	Gran Canaria / Guigui/Hogarzales Formations / Shield Stage	Georoc 2020	[856]	28	28	-15.6	-15.6	s_RG18	Basalt		VOLCANIC ROCK	WR [856]	48.64	4.01		14.33					11.32	9.11	5.82	0.217		1.722	3.03	0.49																1.19	16901
Atlantic	Canary Islands	Gran Canaria / Shield Stage / Guigui/Hogarzales Formations	Georoc 2020	[856]	28	28	-15.6	-15.6	s_A20_UNLEACHED	Basalt		VOLCANIC ROCK	WR [856]	46.94	3.86		15.51					11.38	9.8	6.23	0.177		1.149	3.62	0.48																1.2	16902
Atlantic	Canary Islands	Gran Canaria / Shield Stage / Guigui/Hogarzales Formations	Georoc 2020	[856]	28	28	-15.6	-15.6	s_A21	Basalt		VOLCANIC ROCK	WR [856]	46.73	3.98		15.17					11.82	10.23	5.09	0.177		1.226	3.41	0.519																0.88	16903
Atlantic	Canary Islands	Gran Canaria / Shield Stage / Guigui/Hogarzales Formations	Georoc 2020	[856]	28	28	-15.6	-15.6	s_A6_LEACHED	Basalt		VOLCANIC ROCK	WR [856]	45.76	3.33		9.99					11.68	10.75	13.82	0.181		0.865	2.23	0.387																0.14	16904
Atlantic	Canary Islands	Gran Canaria / Guigui/Hogarzales Formations / Shield Stage	Georoc 2020	[856]	28	28	-15.6	-15.6	s_A17_UNLEACHED	Basalt		VOLCANIC ROCK	WR [856]	47.6	3.13		9.62					12.03	11.71	11.19	0.187		0.863	2.08	0.342																1.27	16905
Atlantic	Canary Islands	Gran Canaria / Shield Stage / Guigui/Hogarzales Formations	Georoc 2020	[856]	28	28	-15.6	-15.6	s_A18_UNLEACHED	Basalt		VOLCANIC ROCK	WR [856]	47.34	3.3		10.99					11.6	10.88	10.35	0.186		0.792	2.38	0.372																1.4	16906
Atlantic	Canary Islands	Gran Canaria / Shield Stage / Guigui/Hogarzales Formations	Georoc 2020	[856]	28	28	-15.6	-15.6	s_A16	Basalt		VOLCANIC ROCK	WR [856]	46.34	2.83		8.81					11.66	11.11	15.15	0.174		0.773	1.92	0.335																1.46	16907
Atlantic	Canary Islands	Gran Canaria / Shield Stage / Guigui/Hogarzales Formations	Georoc 2020	[856]	28	28	-15.6	-15.6	s_A15	Basalt		VOLCANIC ROCK	WR [856]	46.88	3.39		10.44					12.08	10.69	11.66	0.19		0.905	2.11	0.401																1.36	16908
Atlantic	Canary Islands	Gran Canaria / Guigui/Hogarzales Formations / Shield Stage	Georoc 2020	[856]	28	28	-15.6	-15.6	s_A19	Basalt		VOLCANIC ROCK	WR [856]	45.09	2.19		7.21					13.38	6.74	22.35	0.186		0.38	1.16	0.248																3.3	16909
Atlantic	Canary Islands	Gran Canaria / Shield Stage / Guigui/Hogarzales Formations	Georoc 2020	[856]	28	28	-15.6	-15.6	s_A2	Basalt		VOLCANIC ROCK	WR [856]	45.78	2.66		8.97					12.39	8.57	17.15	0.191		0.64	1.86	0.298																1.18	16910
Atlantic	Canary Islands	Gran Canaria / Shield Stage / Guigui/Hogarzales Formations	Georoc 2020	[856]	28	28	-15.6	-15.6	s_A1	Basalt		VOLCANIC ROCK	WR [856]	48.78	3.89		12.08					12.12	10.09	7.28	0.157		0.813	2.62	0.439																1.04	16911
Atlantic	Canary Islands	Gran Canaria / Shield Stage / Guigui/Hogarzales Formations	Georoc 2020	[856]	28	28	-15.6	-15.6	s_A3	Basalt		VOLCANIC ROCK	WR [856]	48.33	3.96		13.03					11.09	10.17	6.8	0.151		1.081	3.58	0.483																1.78	16912
Atlantic	Canary Islands	Gran Canaria / Guigui/Hogarzales Formations / Shield Stage	Georoc 2020	[856]	28	28	-15.6	-15.6	s_A4	Basalt		VOLCANIC ROCK	WR [856]	47.28	3.71		12.4					12.72	10.59	8.04	0.142		0.875	2.8	0.435																1.39	16913
Atlantic	Canary Islands	Gran Canaria / Shield Stage / Guigui/Hogarzales Formations	Georoc 2020	[856]	28	28	-15.6	-15.6	s_A5	Basalt		VOLCANIC ROCK	WR [856]	49.03	3.91		14.06					11.27	9.65	5.81	0.171		1.288	3.2	0.503																1.24	16914
Atlantic	Canary Islands	Gran Canaria / Shield Stage / Guigui/Hogarzales Formations	Georoc 2020	[856]	28	28	-15.6	-15.6	s_RG15	Basalt		VOLCANIC ROCK	WR [856]	46.69	3.09		10.09					12.22	10.19	13.43	0.185		0.72	2.17	0.35																2.34	16915
Atlantic	Canary Islands	Gran Canaria / Shield Stage / Guigui/Hogarzales Formations	Georoc 2020	[856]	28	28	-15.6	-15.6	s_A10	Basalt		VOLCANIC ROCK	WR [856]	48.35	3.95		13.61					10.74	9.73	6.55	0.17		0.927	3.85	0.474																1.5	16916
Atlantic	Canary Islands	Gran Canaria / Guigui/Hogarzales Formations / Shield Stage	Georoc 2020	[856]	28	28	-15.6	-15.6	s_A11	Basalt		VOLCANIC ROCK	WR [856]	48.65	3.76		11.81					11.99	9.79	7.71	0.167		1.038	3.48	0.43																2.16	16917
Atlantic	Canary Islands	Gran Canaria / Shield Stage / Guigui/Hogarzales Formations	Georoc 2020	[856]	28	28	-15.6	-15.6	s_A12	Basalt		VOLCANIC ROCK	WR [856]	47.79	4.07		14.03					11.73	10.35	6.07	0.188		1.221	3.03	0.508																1.04	16918
Atlantic	Canary Islands	Gran Canaria / Shield Stage / Guigui/Hogarzales Formations	Georoc 2020	[856]	28	28	-15.6	-15.6	s_RG10	Basalt		VOLCANIC ROCK	WR [856]	57.22	3.09		10.32					11.15	5.96	3.79	0.108		2.717	3.62	0.504																1.09	16920
Atlantic	Canary Islands	Gran Canaria / Shield Stage / Guigui/Hogarzales Formations	Georoc 2020	[856]	28	28	-15.6	-15.6	s_RG11	Basalt		VOLCANIC ROCK	WR [856]	47.76	3.98		12.89					11.81	11.01	6.6	0.179		0.834	2.89	0.46																2.19	16921
Atlantic	Canary Islands	Gran Canaria / Guigui/Hogarzales Formations / Shield Stage	Georoc 2020	[856]	28	28	-15.6	-15.6	s_RG12	Basalt		VOLCANIC ROCK	WR [856]	50.08	3.92		13.29					11.5	7.1	5.46	0.105		2.207	3.8	0.484																1.9	16922
Atlantic	Canary Islands	Gran Canaria / Shield Stage / Guigui/Hogarzales Formations	Georoc 2020	[856]	28	28	-15.6	-15.6	s_RG13	Basalt		VOLCANIC ROCK	WR [856]	49.34	4.08		13.56					10.34	9.87	6.52	0.131		1.04	3.45	0.47																2.1	16923
Atlantic	Canary Islands	Gran Canaria / Shield Stage / Guigui/Hogarzales Formations	Georoc 2020	[856]	28	28	-15.6	-15.6	s_AB1	Basalt		VOLCANIC ROCK	WR [856]	49.41	3.62		15.83					11.27	8.91	3.54	0.182		1.46	3.86	0.679																1.14	16924
Atlantic	Canary Islands	Gran Canaria / Shield Stage / Guigui/Hogarzales Formations	Georoc 2020	[856]	28	28	-15.6	-15.6	s_B1	Basalt		VOLCANIC ROCK	WR [856]	48.05	4.15		14.36					12.17	10.25	4.88	0.15		1.066	3.22	0.421																0.44	16925
Atlantic	Canary Islands	Gran Canaria / Shield Stage / Guigui/Hogarzales Formations	Georoc 2020	[856]	28	28	-15.6	-15.6	s_B2	Basalt		VOLCANIC ROCK	WR [856]	47.25	4.22		13.81					11.72	10.6	5.74	0.201		1.32	3.11	0.623																1.19	16926
Atlantic	Canary Islands	Gran Canaria / Shield Stage / Guigui/Hogarzales Formations	Georoc 2020	[856]	28	28	-15.6	-15.6	s_B3	Basalt		VOLCANIC ROCK	WR [856]	48.2	3.96		14.53					11.18	9.93	6	0.154		1.244	3.18	0.546																0.95	16927
Atlantic	Canary Islands	Gran Canaria / Guigui/Hogarzales Formations / Shield Stage	Georoc 2020	[856]	28	28	-15.6	-15.6	s_COG	Basalt		VOLCANIC ROCK	WR [856]	48.69	3.92		15.25					10.98	9.27	4.5	0.186		1.552	3.53	0.724																0.93	16928
Atlantic	Canary Islands	Gran Canaria / Shield Stage / Guigui/Hogarzales Formations	Georoc 2020	[856]	28	28	-15.6	-15.6	s_B5	Basalt		VOLCANIC ROCK	WR [856]	48.91	4.45		14.55					12.18	8.51	4.38	0.199		1.742	3.52	0.717																0.94	16929
Atlantic	Canary Islands	Gran Canaria / Shield Stage / Guigui/Hogarzales Formations	Georoc 2020	[856]	28	28	-15.6	-15.6	s_B6	Basalt		VOLCANIC ROCK	WR [856]	50.34	3.6		15.02					10.83	7.97	3.86	0.216		1.723	4.03	0.761																0.87	16930
Atlantic	Canary Islands	Gran Canaria / Shield Stage / Guigui/Hogarzales Formations	Georoc 2020	[856]	28	28	-15.6	-15.6	s_B4	Basalt		VOLCANIC ROCK	WR [856]	50.84	3.36		15.42					10.62	8.41	4.09	0.187		1.478	3.64	0.594																0.93	16931
Atlantic	Canary Islands	Gran Canaria / Guigui/Hogarzales Formations / Shield Stage	Georoc 2020	[856]	28	28	-15.6	-15.6	s_T1	Basalt		VOLCANIC ROCK	WR [856]	46.85	2.9		10.77					11.55	10.98	12.3	0.175		0.745	2.11	0.338																0.46	16932
Atlantic	Canary Islands	Gran Canaria / Shield Stage / Guigui/Hogarzales Formations	Georoc 2020	[856]	28	28	-15.6	-15.6	s_T2	Basalt		VOLCANIC ROCK	WR [856]	47.16	3.64		14.19					11.37	10.89	6.33	0.164		1.087	2.73	0.452																3.4	16933
Atlantic	Canary Islands	Gran Canaria / Shield Stage / Guigui/Hogarzales Formations	Georoc 2020	[856]	28	28	-15.6	-15.6	s_T3	Basalt		VOLCANIC ROCK	WR [856]	46.74	3.83		11.46					11.97	11.97	8.25	0.186		0.968	2.46	0.434																1.09	16934
Atlantic	Canary Islands	Gran Canaria / Shield Stage / Guigui/Hogarzales Formations	Georoc 2020	[856]	28	28	-15.6	-15.6	s_T4	Basalt		VOLCANIC ROCK	WR [856]	46.3	3.49		10.75					11.9	11.18	10.7	0.186		0.936	2.29	0.426																0.68	16935
Atlantic	Canary Islands	Gran Canaria / Guigui/Hogarzales Formations / Shield Stage	Georoc 2020	[856]	28	28	-15.6	-15.6	s_T6	Basalt		VOLCANIC ROCK	WR [856]	47.01	3.63		11					12.01	10.74	10.17	0.183		0.965	2.35	0.405																0.87	16936
Atlantic	Canary Islands	Gran Canaria / Shield Stage / Guigui/Hogarzales Formations	Georoc 2020	[856]	28	28	-15.6	-15.6	s_T8	Basalt		VOLCANIC ROCK	WR [856]	46.35	3.68		11.36					12.08	9.96	10.34	0.187		1.069	2.58	0.466																0.09	16937
Atlantic	Canary Islands	Gran Canaria / Shield Stage / Guigui/Hogarzales Formations	Georoc 2020	[856]	28	28	-15.6	-15.6	s_T11	Basalt		VOLCANIC ROCK	WR [856]	48.04	3.45		10.97					12.04	10.33	10.05	0.181		0.935	2.29	0.422																0.1	16938
Atlantic	Canary Islands	Gran Canaria / Shield Stage / Guigui/Hogarzales Formations	Georoc 2020	[856]	28	28	-15.6	-15.6	s_T12	Basalt		VOLCANIC ROCK	WR [856]	51.43	3.59		13.81					10.44	8.86	5.54	0.167		1.284	3	0.497																0.16	16939
Atlantic	Canary Islands	Gran Canaria / Guigui/Hogarzales Formations / Shield Stage	Georoc 2020	[856]	28	28	-15.6	-15.6	s_T10	Basalt		VOLCANIC ROCK	WR [856]	51.01	3.6		13.73					10.73	8.85	5.59	0.163		1.254	2.62	0.497																-0.01	16940
Atlantic	Canary Islands	Gran Canaria / Shield Stage / Guigui/Hogarzales Formations	Georoc 2020	[856]	28	28	-15.6	-15.6	s_T13	Basalt		VOLCANIC ROCK	WR [856]	48.76	3.46		11.22					11.52	10.32	9.28	0.126		0.872	2.66	0.477																8.1	16941
Atlantic	Canary Islands	Gran Canaria / Shield Stage / Guigui/Hogarzales Formations	Georoc 2020	[856]	28	28	-15.6	-15.6	s_T14	Basalt		VOLCANIC ROCK	WR [856]	47.25	4.08		13.01					11.63	10.77	6.68	0.15		1.101	2.88	0.446																0.9	16942
Atlantic	Canary Islands	Gran Canaria / Shield Stage / Guigui/Hogarzales Formations	Georoc 2020	[856]	28	28	-15.6	-15.6	s_SB	Basalt		VOLCANIC ROCK	WR [856]	47.47	4.73		13.85					12.19	9.92	4.92	0.165		1.382	3.45	0.685																0.4	16943
Atlantic	Canary Islands	Gran Canaria / Guigui/Hogarzales Formations / Shield Stage	Georoc 2020	[856]	28	28	-15.6	-15.6	s_SC	Basalt		VOLCANIC ROCK	WR [856]	47.32	4.81		13.4					11.95	10.24	5.51	0.177		1.366	3.28	0.624																0.04	16944
Atlantic	Canary Islands	Gran Canaria / Shield Stage / Guigui/Hogarzales Formations	Georoc 2020	[856]	28	28	-15.6	-15.6	s_SD	Basalt		VOLCANIC ROCK	WR [856]	47.33	4.81		13.43					12.09	10.12	5.43	0.174		1.37	3.12	0.632																0.15	16945
Atlantic	Canary Islands	Gran Canaria / Shield Stage / Guigui/Hogarzales Formations	Georoc 2020	[856]	28	28	-15.6	-15.6	s_SE	Basalt		VOLCANIC ROCK	WR [856]	47.81	4.54		13.94					11.87	10.07	5.08	0.165		1.288	3.29	0.612																0.47	16946
Atlantic	Canary Islands	Gran Canaria / Shield Stage / Guigui/Hogarzales Formations	Georoc 2020	[856]	28	28	-15.6	-15.6	s_SF	Basalt		VOLCANIC ROCK	WR [856]	47.55	4.4		13.85					11.65	10.29	5.64	0.182		1.232	3.44	0.608																0.43	16947
Atlantic	Canary Islands	Gran Canaria / Guigui/Hogarzales Formations / Shield Stage	Georoc 2020	[856]	28	28	-15.6	-15.6	s_S2	Basalt		VOLCANIC ROCK	WR [856]	47.93	4.89		13.51					13.31	9.42	4.9	0.144		1.186	3.15	0.561																1.38	16948
Atlantic	Canary Islands	Gran Canaria / Shield Stage / Guigui/Hogarzales Formations	Georoc 2020	[856]	28	28	-15.6	-15.6	s_S4	Basalt		VOLCANIC ROCK	WR [856]	47.73	4.48		13.03					12.34	10.38	5.59	0.146		1.055	2.94	0.537																0	16949
Atlantic	Canary Islands	Gran Canaria / Shield Stage / Guigui/Hogarzales Formations	Georoc 2020	[856]	28	28	-15.6	-15.6	s_S5	Basalt		VOLCANIC ROCK	WR [856]	48.91	5.28		15.36					12.66	7.83	3.16	0.12		1.449	3.63	0.648																1.34	16950
Atlantic	Canary Islands	Gran Canaria / Shield Stage / Guigui/Hogarzales Formations	Georoc 2020	[856]	28	28	-15.6	-15.6	s_SA	Basalt		VOLCANIC ROCK	WR [856]	48.14	4.92		14.33					12.52	9.22	4.39	0.153		1.286	3.34	0.597																2.1	16951
Atlantic	Canary Islands	Gran Canaria / Guigui/Hogarzales Formations / Shield Stage	Georoc 2020	[856]	28	28	-15.6	-15.6	s_S11	Basalt		VOLCANIC ROCK	WR [856]	48.46	4.49		13.25					12.05	9.83	5.46	0.158		1.273	3.14	0.549																0.86	16952
Atlantic	Canary Islands	Gran Canaria / Shield Stage / Guigui/Hogarzales Formations	Georoc 2020	[856]	28	28	-15.6	-15.6	s_S12	Basalt		VOLCANIC ROCK	WR [856]	47.91	4.43		12.99					11.61	10.15	7.13	0.165		1.204	2.88	0.549																0.95	16953
Atlantic	Canary Islands	Gran Canaria / Shield Stage / Guigui/Hogarzales Formations	Georoc 2020	[856]	28	28	-15.6	-15.6	s_S13	Basalt		VOLCANIC ROCK	WR [856]	47.5	4.52		12.95					12.23	10.65	5.99	0.177		0.95	2.67	0.434																-0.34	16954
Atlantic	Canary Islands	La Palma / San Antonio	Georoc 2020	[941]	28.53	28.53	-17.8	-17.8	s_PAT2	Basalt		VOLCANIC ROCK	WR [941]	44.28	3.64		13.11					11.8	11.37	8.26	0.19		1.76	3.83	0.89																	17172
Atlantic	Canary Islands	Gran Canaria / Hogarzales Formation	Georoc 2020	[901]	28	28	-15.6	-15.6	s_GC665	Tholeiite		VOLCANIC ROCK	WR [901]	47.85	4.3		13.85					13.3	10.27	5.05	0.17		0.98	2.97	0.51	0.33				0.11												17182
Atlantic	Canary Islands	Gran Canaria / Hogarzales Formation	Georoc 2020	[901]	28	28	-15.6	-15.6	s_GC670	Tholeiite		VOLCANIC ROCK	WR [901]	50.78	3.44		13.66					11.55	8.31	3.48	0.19		1.43	3.75	1.11	0.38				0.12												17183
Atlantic	Canary Islands	Gran Canaria / Post-Shield Stage / Mogan Formation	Georoc 2020	[901]	28	28	-15.6	-15.6	s_GC612	Hawaiite		VOLCANIC ROCK	WR [901]	54.78	3.59		14.84					10.77	8.39	3.84	0.28		1.96	4.28	1.31	0.71				0.11												17186
Atlantic	Canary Islands	Gran Canaria / Post-Shield Stage / Mogan Formation	Georoc 2020	[901]	28	28	-15.6	-15.6	s_V5	Comendite		VOLCANIC ROCK	WR [901]	68.9	0.75		14.4					3.39	0.36	0.35	0.18		3.85	6.3	0.06	0.39				0.08												17188
Atlantic	Canary Islands	Gran Canaria / Post-Shield Stage / Mogan Formation	Georoc 2020	[901]	28	28	-15.6	-15.6	s_W8	Comendite		VOLCANIC ROCK	WR [901]	68.5	0.66		14.01					3.55	0.37	0.49	0.18		4.81	6.37	0.05	0.48				0.12												17189
Atlantic	Canary Islands	Gran Canaria / Post-Shield Stage / Mogan Formation	Georoc 2020	[901]	28	28	-15.6	-15.6	s_GC619	Basalt, Alkaline, Olivine		VOLCANIC ROCK	WR [901]	44.88	4.65		14.56					12.43	11.01	5.54	0.19		1.28	2.94	0.81	0.8				0.12												17190
Atlantic	Canary Islands	Gran Canaria / Post-Shield Stage / Mogan Formation	Georoc 2020	[901]	28	28	-15.6	-15.6	s_U12	Comendite		VOLCANIC ROCK	WR [901]	68.3	0.67		14.5					3.45	0.3	0.39	0.22		5.07	6.97	0.06	0.31																17191
Atlantic	Canary Islands	Gran Canaria / Fataga Formation / Post-Shield Stage	Georoc 2020	[901]	28	28	-15.6	-15.6	s_GC683	Basanite		VOLCANIC ROCK	WR [901]	39.81	5.18		14.05					13.73	13.31	6.55	0.21		1.03	2.39	2.32	1.12				0.11												17193
Atlantic	Canary Islands	Gran Canaria / Shield Stage / Guigui Formation	Georoc 2020	[947]	28	28	-15.6	-15.6	s_G1528	Tholeiite		VOLCANIC ROCK	WR [947]	46.2	3.93		12.38			6.89	5.59		10.51	7.86	0.18		1.05	2.5	0.44	1.41				0.06												17241
Atlantic	Canary Islands	Gran Canaria / Shield Stage / Guigui Formation	Georoc 2020	[947]	28	28	-15.6	-15.6	s_G1263	Tholeiite		VOLCANIC ROCK	WR [947]	46.5	4.07		13.1			5.76	6.87		10.8	6.3	0.16		1.17	2.84	0.48	2.1				0.1												17243
Atlantic	Canary Islands	Gran Canaria / Hogarzales Formation	Georoc 2020	[947]	28	28	-15.6	-15.6	s_H1268	Tholeiite		VOLCANIC ROCK	WR [947]	47.8	4.1		14.3			5.66	6.64		9.55	4.56	0.16		1.4	3.33	0.62	1.7				0.06												17246
Atlantic	Canary Islands	Gran Canaria / Post-Shield Stage / Mogan Formation	Georoc 2020	[947]	28	28	-15.6	-15.6	s_M1721	Basalt, Alkaline		VOLCANIC ROCK	WR [947]	44	4.65		14.78			6.28	6.55		11.49	5.58	0.19		1.2	2.68	0.73	1.06				0.09												17247
Atlantic	Canary Islands	Gran Canaria / Fataga Formation / Post-Shield Stage	Georoc 2020	[947]	28	28	-15.6	-15.6	s_F17145	Basanite		VOLCANIC ROCK	WR [947]	40.4	4.77		13.6			5.78	7.97		13.11	6.62	0.19		0.79	1.61	1.66	1.58				0.21												17248
Atlantic	Canary Islands	Gran Canaria / Fataga Formation / Post-Shield Stage	Georoc 2020	[947]	28	28	-15.6	-15.6	s_F1715	Basanite		VOLCANIC ROCK	WR [947]	41.5	4.91		14.09			8.37	4.88		12.83	5.98	0.21		0.43	1.27	1.68	2.33				0.07												17249
Atlantic	Canary Islands	Gran Canaria / Post-Shield Stage / El Tablero Formation	Georoc 2020	[947]	28	28	-15.6	-15.6	s_ET78-1	Basanite		VOLCANIC ROCK	WR [947]	43.2	4.25		13.41			5.88	6.93		10.64	7.92	0.2		1.66	2.86	1.04	1.33				0.32												17252
Atlantic	Canary Islands	Gran Canaria / Post-Shield Stage / El Tablero Formation	Georoc 2020	[947]	28	28	-15.6	-15.6	s_ET54	Basanite		VOLCANIC ROCK	WR [947]	43.8	3.79		11.79			7.53	6.3		11.02	9.12	0.17		1.17	2.73	0.9	1.44				0.16												17253
Atlantic	Canary Islands	Gran Canaria / Post-Shield Stage / El Tablero Formation	Georoc 2020	[947]	28	28	-15.6	-15.6	s_ET83	Basalt, Alkaline		VOLCANIC ROCK	WR [947]	43.8	3.8		12.02			8.38	5.27		11.03	8.44	0.19		1.2	1.98	0.94	1.6				0.09												17254
Atlantic	Canary Islands	Gran Canaria / Post-Shield Stage / El Tablero Formation	Georoc 2020	[947]	28	28	-15.6	-15.6	s_ET52	Basanite		VOLCANIC ROCK	WR [947]	41.9	4.27		12.02			6.49	6.69		11.48	8.09	0.19		0.92	2.87	1.11	2.42				0.11												17255
Atlantic	Canary Islands	Gran Canaria / Post-Shield Stage / El Tablero Formation	Georoc 2020	[947]	28	28	-15.6	-15.6	s_ET53	Basalt, Alkaline		VOLCANIC ROCK	WR [947]	44.4	3.35		11.89			5.5	7.26		10.49	10.4	0.18		0.82	2.86	0.79	1.95				0.21												17256
Atlantic	Canary Islands	Gran Canaria / Post-Shield Stage / El Tablero Formation	Georoc 2020	[947]	28	28	-15.6	-15.6	s_ET60	Tholeiite		VOLCANIC ROCK	WR [947]	47.9	3.02		12.34			5.75	7.1		9.94	9.5	0.18		0.69	2.7	0.55	0.61				0.07												17257
Atlantic	Canary Islands	Gran Canaria / Post-Shield Stage / El Tablero Formation	Georoc 2020	[947]	28	28	-15.6	-15.6	s_ET62-2	Tholeiite		VOLCANIC ROCK	WR [947]	48	2.99		12.47			7.21	5.74		9.65	7.8	0.15		0.69	2.71	0.55	1.23				0.06												17258
Atlantic	Canary Islands	Gran Canaria / Post-Shield Stage / El Tablero Formation	Georoc 2020	[947]	28	28	-15.6	-15.6	s_ET63-3	Tholeiite		VOLCANIC ROCK	WR [947]	48.5	2.94		12.5			6.02	6.48		9.67	8.61	0.16		0.68	2.5	0.47	1.02				0.1												17259
Atlantic	Canary Islands	Gran Canaria / Post-Shield Stage / El Tablero Formation	Georoc 2020	[947]	28	28	-15.6	-15.6	s_ETB14	Tholeiite		VOLCANIC ROCK	WR [947]	47.7	2.86		12.16			8.41	4.28		9.73	9.94	0.17		0.56	2.62	0.51	0.54				0.32												17260
Atlantic	Canary Islands	Gran Canaria / Post-Shield Stage / El Tablero Formation	Georoc 2020	[947]	28	28	-15.6	-15.6	s_ET63-1	Tholeiite		VOLCANIC ROCK	WR [947]	48.3	3.13		13.21			11.12	2.81		10.11	6.13	0.18		0.6	2.82	0.58	1.14				0.06												17261
Atlantic	Canary Islands	Gran Canaria / Post-Shield Stage / El Tablero Formation	Georoc 2020	[947]	28	28	-15.6	-15.6	s_ET95	Basanite		VOLCANIC ROCK	WR [947]	43.2	3.77		10.96			4.39	7.77		10.59	12.22	0.18		1.54	2.73	0.8	1.92				0.76												17263
Atlantic	Canary Islands	Gran Canaria / Post-Shield Stage / El Tablero Formation	Georoc 2020	[947]	28	28	-15.6	-15.6	s_ET90	Basanite		VOLCANIC ROCK	WR [947]	41.6	3.62		10.91			4.93	7.81		11.47	12.47	0.2		1.21	2.73	0.92	1.25				1.33												17264
Atlantic	Canary Islands	Gran Canaria / Post-Shield Stage / Roque Nublo Formation	Georoc 2020	[947]	28	28	-15.6	-15.6	s_RN70	Basalt, Alkaline		VOLCANIC ROCK	WR [947]	44.7	4.18		14.99			6.56	5.01		10.93	5.27	0.2		1	3.43	1.09	2.31				0.13												17269
Atlantic	Canary Islands	Gran Canaria / Post-Shield Stage / Roque Nublo Formation	Georoc 2020	[947]	28	28	-15.6	-15.6	s_RN1257	Basalt, Alkaline		VOLCANIC ROCK	WR [947]	44.7	3.7		11.99			7.31	6.41		10.72	8.91	0.18		1.02	2.55	0.81	1.18				0.28												17274
Atlantic	Canary Islands	Gran Canaria / Post-Shield Stage / Roque Nublo Formation	Georoc 2020	[947]	28	28	-15.6	-15.6	s_RNB129	Basanite		VOLCANIC ROCK	WR [947]	41	4.71		12.27			5.94	6.93		12.32	7.54	0.2		0.75	3.62	1.26	1.58				0.03												17275
Atlantic	Canary Islands	Gran Canaria / Rejuvenated Stage / Los Listos And Los Pechos Formations	Georoc 2020	[947]	28	28	-15.6	-15.6	s_LL1424	Nephelinite		VOLCANIC ROCK	WR [947]	38.6	3.98		9.22			9.93	4.02		12.88	14.02	0.2		1.18	2.72	1.45	0.92				0.38												17283
Atlantic	Canary Islands	Gran Canaria / Rejuvenated Stage / Los Listos And Los Pechos Formations	Georoc 2020	[947]	28	28	-15.6	-15.6	s_LL1115	Nephelinite		VOLCANIC ROCK	WR [947]	40.6	3.42		10.76			5.8	7.3		12.4	13.3	0.2		0.6	2.2	1.33	1.5				0.19												17284
Atlantic	Canary Islands	Gran Canaria / Rejuvenated Stage / Los Listos And Los Pechos Formations	Georoc 2020	[947]	28	28	-15.6	-15.6	s_LLC16	Nephelinite		VOLCANIC ROCK	WR [947]	39.2	3.52		9.84			7.61	5.17		12.55	14.07	0.19		1.24	2.68	0.98	1.18				0.05												17285
Atlantic	Canary Islands	Gran Canaria / Rejuvenated Stage / Los Listos And Los Pechos Formations	Georoc 2020	[947]	28	28	-15.6	-15.6	s_LL1138	Basanite		VOLCANIC ROCK	WR [947]	41	3.64		9.97			8.14	4.75		11.89	13.93	0.18		0.58	2.66	0.86	1.89				0.15												17286
Atlantic	Canary Islands	Gran Canaria / Rejuvenated Stage / Los Listos And Los Pechos Formations	Georoc 2020	[947]	28	28	-15.6	-15.6	s_LL1141	Nephelinite		VOLCANIC ROCK	WR [947]	38.6	3.51		9.78			8.61	4.61		13.29	14.28	0.2		1.03	2.33	1.46	1.13				0.28												17287
Atlantic	Canary Islands	Gran Canaria / Rejuvenated Stage / Los Listos And Los Pechos Formations	Georoc 2020	[947]	28	28	-15.6	-15.6	s_LL1142	Nephelinite		VOLCANIC ROCK	WR [947]	38.7	4.01		10.15			9.72	4.51		12.91	13.21	0.22		1.11	2.68	1.41	1.61				0.21												17288
Atlantic	Canary Islands	Gran Canaria / Rejuvenated Stage / Los Listos And Los Pechos Formations	Georoc 2020	[947]	28	28	-15.6	-15.6	s_LLC9	Nephelinite		VOLCANIC ROCK	WR [947]	36.9	4.09		9.98			5.57	8.11		13.16	13.35	0.21		0.62	2.7	1.73	1.71				0.03												17289
Atlantic	Canary Islands	Gran Canaria / Rejuvenated Stage / Los Listos And Los Pechos Formations	Georoc 2020	[947]	28	28	-15.6	-15.6	s_LLC22	Nephelinite		VOLCANIC ROCK	WR [947]	37	3.2		8.78			4.71	7.5		13.85	16.77	0.2		0.84	2.79	1.38	1.13				0.06												17291
Atlantic	Canary Islands	Gran Canaria / Rejuvenated Stage	Georoc 2020	[947]	28	28	-15.6	-15.6	s_Q307	Nephelinite		VOLCANIC ROCK	WR [947]	38.4	5.62		9.76			4.12	10.33		11.56	12.68	0.19		1.15	2.9	1.17	1.34				0.05												17293
Atlantic	Canary Islands	Gran Canaria / Rejuvenated Stage	Georoc 2020	[947]	28	28	-15.6	-15.6	s_QD6	Basalt, Alkaline		VOLCANIC ROCK	WR [947]	44.65	3.45		11.95			13.61			10.88	9.04	0.18		1.14	3.58	0.94	0.47				0.13												17294
Atlantic	Canary Islands	Gran Canaria / Rejuvenated Stage	Georoc 2020	[947]	28	28	-15.6	-15.6	s_Q1369	Basanite		VOLCANIC ROCK	WR [947]	41.7	3.35		10.5			3.15	8.8		11.2	16.2	0.18		1.33	2.47	0.67	0.1				0.05												17296
Atlantic	Canary Islands	Gran Canaria	Georoc 2020	[1349]	27.81	27.81	-15.73	-15.73	s_1	Not Given		VOLCANIC ROCK	WR [1349]	67.1	1.1		12			5.6	0.8		0.5	0.7	0.28		3.8	7	0.17	0.5																17299
Atlantic	Canary Islands	Gran Canaria	Georoc 2020	[1349]	27.81	27.81	-15.73	-15.73	s_2	Not Given		VOLCANIC ROCK	WR [1349]	68.5	1		9.6			7.5	0.1		0.5	0.1	0.45		4.5	5.2	0.1	1.7																17300
Atlantic	Canary Islands	Gran Canaria	Georoc 2020	[1349]	27.81	27.81	-15.73	-15.73	s_3	Not Given		VOLCANIC ROCK	WR [1349]	68.2	0.55		14			3.6	0.1		0.6	0.2	0.24		4.9	6.4	0.07	0.5																17301
Atlantic	Canary Islands	Gran Canaria	Georoc 2020	[1349]	27.81	27.81	-15.73	-15.73	s_4	Not Given		VOLCANIC ROCK	WR [1349]	68.4	0.6		14			3.3	0.3		0.6	0.2	0.24		4.8	6.4	0.08	0.6																17302
Atlantic	Canary Islands	Gran Canaria	Georoc 2020	[1349]	27.81	27.81	-15.73	-15.73	s_5	Not Given		VOLCANIC ROCK	WR [1349]	65.86	1		10.35			6.89	0.62		0.78	2.06	0.25		4.7	4.53	0.08		1.5	1.75														17303
Atlantic	Canary Islands	Gran Canaria	Georoc 2020	[1349]	27.81	27.81	-15.73	-15.73	s_6	Not Given		VOLCANIC ROCK	WR [1349]	70.54	1		11.3			5.09	1.2		0.86	0.11	0.16		3.62	5.04			0.89	0.21														17304
Atlantic	Canary Islands	Gran Canaria	Georoc 2020	[1349]	27.81	27.81	-15.73	-15.73	s_7	Not Given		VOLCANIC ROCK	WR [1349]	66.28	1.27		13.27			5.6	0.88		0.7	0.04	0.13		4.23	5.61	0.13		1.56	0.32														17305
Atlantic	Canary Islands	Gran Canaria	Georoc 2020	[1349]	27.81	27.81	-15.73	-15.73	s_8	Not Given		VOLCANIC ROCK	WR [1349]	66.08	1.04		14.78			1.58	1.84		1.52	0.54	0.13		3.92	5.09	0.07		3.12	0.24														17306
Atlantic	Canary Islands	Gran Canaria	Georoc 2020	[1349]	27.81	27.81	-15.73	-15.73	s_9	Not Given		VOLCANIC ROCK	WR [1349]	71.03	0.62		12.95			3.98	0.23		0.27	0.37	0.24		4.38	5.72	0.05		0.16	0.17						0.08								17307
Atlantic	Canary Islands	Gran Canaria	Georoc 2020	[1349]	27.81	27.81	-15.73	-15.73	s_10	Not Given		VOLCANIC ROCK	WR [1349]	62.33	0.67		18.92			2.98	0.21		0.47	0.26	0.14		5.5	6.15	0.07		1.24	0.78														17308
Atlantic	Canary Islands	La Palma / Taburiente / Coberta Series	Georoc 2020	[916]	28.75	28.75	-19	-19	s_LP104	Tephrite		VOLCANIC ROCK	WR [916]	43.69	3.48		15.48					11.09	10.11	4.62	0.22		1.38	5.34	1.14																1	17493
Atlantic	Canary Islands	La Palma / Taburiente / Coberta Series	Georoc 2020	[916]	28.75	28.75	-19	-19	s_LP105	Tephrite		VOLCANIC ROCK	WR [916]	42.73	3.68		14.82					12.16	10.61	5.34	0.23		1.25	4.61	1.11																1.2	17494
Atlantic	Canary Islands	La Palma / Taburiente / Coberta Series	Georoc 2020	[916]	28.75	28.75	-19	-19	s_LP107	Basanite		VOLCANIC ROCK	WR [916]	44.12	2.64		9.3					12.13	10.86	15.5	0.18		0.65	1.78	0.41																0.3	17497
Atlantic	Canary Islands	La Palma / Taburiente / Coberta Series	Georoc 2020	[916]	28.75	28.75	-19	-19	s_LP110	Basanite		VOLCANIC ROCK	WR [916]	43.58	3.42		12.52					12.89	11.73	9.81	0.19		0.94	2.47	0.52																0.6	17498
Atlantic	Canary Islands	La Palma / Taburiente / Coberta Series	Georoc 2020	[916]	28.75	28.75	-19	-19	s_LP111	Basanite		VOLCANIC ROCK	WR [916]	43.37	3.5		12.48					12.32	13.42	8.4	0.18		1.22	2.9	0.68																0.4	17499
Atlantic	Canary Islands	La Palma / Taburiente / Coberta Series	Georoc 2020	[916]	28.75	28.75	-19	-19	s_LP113	Basanite		VOLCANIC ROCK	WR [916]	45.18	3.31		14.27					11.79	10.09	8.27	0.19		1.33	3.34	0.77																0	17501
Atlantic	Canary Islands	La Palma / Taburiente / Coberta Series	Georoc 2020	[916]	28.75	28.75	-19	-19	s_LP115	Basanite		VOLCANIC ROCK	WR [916]	42.54	3.51		10.61					13.14	12.09	11.44	0.2		1.22	2.56	0.71																-0.3	17502
Atlantic	Canary Islands	La Palma / Taburiente / Coberta Series	Georoc 2020	[916]	28.75	28.75	-19	-19	s_LP116	Basanite		VOLCANIC ROCK	WR [916]	42.13	3.75		13.1					12.8	11.5	9.09	0.17		1.32	3.28	0.64																-0.4	17503
Atlantic	Canary Islands	La Palma / Taburiente / Coberta Series	Georoc 2020	[916]	28.75	28.75	-19	-19	s_LP120	Basanite		VOLCANIC ROCK	WR [916]	43.75	3.89		15.3					11.81	10.22	5.71	0.21		1.91	3.89	1.16																-0.3	17504
Atlantic	Canary Islands	La Palma / Taburiente / Coberta Series	Georoc 2020	[916]	28.75	28.75	-19	-19	s_LP129	Basanite		VOLCANIC ROCK	WR [916]	43.54	3.3		12.57					13.06	11.46	10.29	0.19		1.1	2.88	0.53																-0.3	17505
Atlantic	Canary Islands	La Palma / Seamount Series	Georoc 2020	[916]	28.67	28.67	-17.9	-17.9	s_LP103	Basalt, Alkaline	Aphyric [916]	VOLCANIC ROCK	WR [916]	43.79	2.98		14.63					10.13	9.51	5.19	0.17		1.03	4.77	0.57																5.2	17509
Atlantic	Canary Islands	La Palma / Seamount Series	Georoc 2020	[916]	28.67	28.67	-17.9	-17.9	s_LP102	Basalt, Alkaline	Aphyric [916]	VOLCANIC ROCK	WR [916]	41.66	3.33		15.09					12.15	4.47	8.34	0.1		0.36	3.47	0.45																7.3	17510
Atlantic	Canary Islands	La Palma / Seamount Series	Georoc 2020	[916]	28.67	28.67	-17.9	-17.9	s_LP140	Basalt	Aphyric To Slightly Plagioclase-Phyric [916]	VOLCANIC ROCK	WR [916]	44.59	3.21		15.05					11.39	8.14	6.13	0.17		0.07	4.6	0.62																4.3	17511
Atlantic	Canary Islands	La Palma / Seamount Series	Georoc 2020	[916]	28.67	28.67	-17.9	-17.9	s_LP141	Basalt	Aphyric To Slightly Plagioclase-Phyric [916]	VOLCANIC ROCK	WR [916]	39.49	2.74		18.18					12.5	14.41	4.33	0.15		0.57	1.7	0.42																4	17512
Atlantic	Canary Islands	La Palma / Seamount Series	Georoc 2020	[916]	28.67	28.67	-17.9	-17.9	s_LP142	Basalt	Aphyric To Slightly Plagioclase-Phyric [916]	VOLCANIC ROCK	WR [916]	45.51	3.11		14.95					10.75	8.52	6.1	0.16		1.63	3.31	0.51																3.9	17514
Atlantic	Canary Islands	La Palma / Seamount Series	Georoc 2020	[916]	28.67	28.67	-17.9	-17.9	s_LP143	Basalt	Aphyric To Slightly Plagioclase-Phyric [916]	VOLCANIC ROCK	WR [916]	33.24	1.02		18.77					13.15	24.73	0.93	0.11		0.01	0.08	0.18																5.4	17516
Atlantic	Canary Islands	La Palma / Taburiente / Coberta Series	Georoc 2020	[916]	28.75	28.75	-19	-19	s_LP109	Basanite		VOLCANIC ROCK	WR [916]	44.87	3.79		15.91					11.46	10.08	4.99	0.19		1.63	4.07	0.74																-0.2	17518
Atlantic	Canary Islands	La Palma / Taburiente / Coberta Series	Georoc 2020	[916]	28.75	28.75	-19	-19	s_LP118	Basanite		VOLCANIC ROCK	WR [916]	43.27	3.17		10.58					12.88	12.22	12.33	0.18		0.54	2.84	0.44																-0.1	17519
Atlantic	Canary Islands	La Palma / Taburiente / Coberta Series	Georoc 2020	[916]	28.75	28.75	-19	-19	s_LP123	Basanite		VOLCANIC ROCK	WR [916]	41.49	3.8		12.32					13.24	11.61	10.17	0.19		1.18	2.85	0.62																-0.2	17520
Atlantic	Canary Islands	La Palma / Taburiente / Coberta Series	Georoc 2020	[916]	28.75	28.75	-19	-19	s_LP124	Basanite		VOLCANIC ROCK	WR [916]	43.29	3.76		12.31					12.91	11.64	9.93	0.19		1.01	2.37	0.67																0.4	17521
Atlantic	Canary Islands	La Palma / Taburiente / Coberta Series	Georoc 2020	[916]	28.75	28.75	-19	-19	s_LP127	Basanite		VOLCANIC ROCK	WR [916]	42.36	3.85		11.57					13.71	11.49	10.98	0.19		0.96	2.2	0.6																-0.1	17522
Atlantic	Canary Islands	La Palma / Taburiente / Coberta Series	Georoc 2020	[916]	28.75	28.75	-19	-19	s_LP136	Basanite		VOLCANIC ROCK	WR [916]	40.41	3.01		11.11					11.66	10.21	10.6	0.17		0.76	2.23	0.34																6.6	17524
Atlantic	Canary Islands	Lanzarote / Basalt Series I	Georoc 2020	[866]	29.1	29.1	-13.43	-13.43	s_13.352ILM	Oceanite		VOLCANIC ROCK	WR [866]	42.5	1.87		10.57			3.76	8.32		11.49	15.82	0.16		0.85	2.52	0.67		1.29			0.17												17600
Atlantic	Canary Islands	Fuerteventura / Basalt Series I	Georoc 2020	[866]	28.8	28.8	-13.73	-13.73	s_16.827ILM	Oceanite		VOLCANIC ROCK	WR [866]	40.25	2.77		11.99			7.28	5.8		11.86	11.88	0.18		1	3.36	0.98		2.09			0.15												17606
Atlantic	Canary Islands	Fuerteventura / Basalt Series I	Georoc 2020	[866]	28.06	28.06	-13.97	-13.97	s_17.266ILM	Trachybasalt		VOLCANIC ROCK	WR [866]	42.3	2.7		11.34			5.77	7.23		10.68	13.64	0.16		1.08	2.68	0.34		1.33			0.2												17608
Atlantic	Canary Islands	Fuerteventura / Basalt Series I	Georoc 2020	[866]	28.4	28.4	-14	-14	s_16.482ILM	Basalt, Olivine		VOLCANIC ROCK	WR [866]	42.95	2.63		12.45			3.69	8.33		11.1	12.06	0.16		1.6	3.26	0.74		0.76															17610
Atlantic	Canary Islands	Fuerteventura / Basalt Series I	Georoc 2020	[866]	28.42	28.42	-13.97	-13.97	s_16.177ILM	Basalt, Olivine-Augite		VOLCANIC ROCK	WR [866]	44.1	2.46		13.19			4.61	8.19		9.61	11.07	0.15		1.16	2.62	0.39		2.07			0.15												17613
Atlantic	Canary Islands	Fuerteventura / Basalt Series I	Georoc 2020	[866]	28.42	28.42	-13.97	-13.97	s_16.412ILM	Basalt, Olivine-Augite		VOLCANIC ROCK	WR [866]	44.55	2.38		14.5			4.99	6.91		9.98	9.89	0.16		1.34	2.42	0.5		2.06			0.06												17614
Atlantic	Canary Islands	Fuerteventura / Basalt Series I	Georoc 2020	[866]	28.61	28.61	-13.88	-13.88	s_16.447ILM	Basalt, Olivine		VOLCANIC ROCK	WR [866]	44.9	2.77		15.47			7.61	6.2		10.6	6.23	0.16		1	3.23	0.58		1.23															17616
Atlantic	Canary Islands	Fuerteventura / Basalt Series I	Georoc 2020	[866]	28.42	28.42	-13.97	-13.97	s_17.104ILM	Trachybasalt		VOLCANIC ROCK	WR [866]	51.35	2.07		17.8			3.59	4.1		6.41	3.31	0.19		2.46	4.88	0.84		2.71															17619
Atlantic	Canary Islands	Lanzarote / Basalt Series Ii And Iii	Georoc 2020	[866]	29.1	29.1	-13.42	-13.42	s_13.418ILM	Basalt, Olivine		VOLCANIC ROCK	WR [866]	45.55	2.35		13.13			3.48	7.94		10.71	10.85	0.17		1.12	3	0.6		1.09															17660
Atlantic	Canary Islands	Lanzarote / Basalt Series Ii And Iii	Georoc 2020	[866]	29.1	29.1	-13.42	-13.42	s_13.632ILM	Basalt, Pyroxene-Olivine		VOLCANIC ROCK	WR [866]	46.12	2.07		12.28			1.94	8.53		10.43	13.66	0.16		1	2.52	0.77		0.35															17661
Atlantic	Canary Islands	Lanzarote / Basalt Series Ii And Iii	Georoc 2020	[866]	29.1	29.1	-13.42	-13.42	s_13.260ILM	Basalt, Olivine		VOLCANIC ROCK	WR [866]	42.5	2.77		12.03			2.9	8.73		10.51	15.72	0.16		1.25	2.5	0.77		0.52															17662
Atlantic	Canary Islands	Lanzarote / Basalt Series Ii And Iii	Georoc 2020	[866]	29.4	29.4	-13.41	-13.41	s_13.591ILM	Basalt, Olivine		VOLCANIC ROCK	WR [866]	43.65	2.59		13.07			1.98	9.25		11.02	11.73	0.16		1.27	3.48	0.74		0.27			0.04												17663
Atlantic	Canary Islands	Lanzarote / Basalt Series Ii And Iii	Georoc 2020	[866]	29.07	29.07	-13.37	-13.37	s_13.225ILM	Basalt, Olivine		VOLCANIC ROCK	WR [866]	43.72	2.36		12.62			3.26	8.38		10.46	13.75	0.16		1.28	2.74	0.67		0.33															17664
Atlantic	Canary Islands	Lanzarote / Basalt Series Ii And Iii	Georoc 2020	[866]	29.29	29.29	-13.2	-13.2	s_13.539ILM	Oceanite		VOLCANIC ROCK	WR [866]	45	2.17		13.38			2.99	8.11		12.39	10.58	0.14		1.07	3.26	0.59		0.81															17665
Atlantic	Canary Islands	Lanzarote / Basalt Series Ii And Iii	Georoc 2020	[866]	29.12	29.12	-13.53	-13.53	s_12.861ILM	Basalt, Olivine		VOLCANIC ROCK	WR [866]	45.6	2.36		13.17			2.84	8.75		10.93	11.28	0.19		0.98	2.6	0.44		1.22															17666
Atlantic	Canary Islands	Lanzarote / Basalt Series Ii And Iii	Georoc 2020	[866]	29.29	29.29	-13.45	-13.45	s_13.540ILM	Basalt, Olivine		VOLCANIC ROCK	WR [866]	45.7	2.25		13.29			3.1	8.33		10.31	10.62	0.14		1.1	3.72	0.59		0.54															17667
Atlantic	Canary Islands	Lanzarote / Basalt Series Ii And Iii	Georoc 2020	[866]	29.29	29.29	-13.2	-13.2	s_13.542ILM	Basalt, Olivine		VOLCANIC ROCK	WR [866]	45.8	2.34		13.87			4.56	7.32		11.38	8.12	0.15		1.12	3.28	0.71		0.92			0.3												17668
Atlantic	Canary Islands	Lanzarote / Basalt Series Ii And Iii	Georoc 2020	[866]	29.26	29.26	-13.37	-13.37	s_13.555ILM	Basalt, Olivine-Augite		VOLCANIC ROCK	WR [866]	46.55	2.23		13.68			7.2	4.59		10.73	9.96	0.14		0.98	3.2	0.67		0.26															17669
Atlantic	Canary Islands	Lanzarote / Basalt Series Ii And Iii	Georoc 2020	[866]	28.93	28.93	-13.79	-13.79	s_14.153ILM	Basalt, Olivine		VOLCANIC ROCK	WR [866]	47.05	2.88		12.86			2.86	9.51		9.18	10.41	0.14		0.97	3.12	0.47		0.58															17670
Atlantic	Canary Islands	Lanzarote / Basalt Series Iv	Georoc 2020	[866]	29.29	29.29	-13.45	-13.45	s_13.518ILM	Oceanite		VOLCANIC ROCK	WR [866]	40.3	2.28		11.22			4.92	5.88		12.28	13.11	0.15		1.18	3.2	1.02		2.45			1.21												17671
Atlantic	Canary Islands	Lanzarote / Basalt Series Iv	Georoc 2020	[866]	29.4	29.4	-13.41	-13.41	s_13.592ILM	Basalt, Olivine		VOLCANIC ROCK	WR [866]	42.7	2.32		12.84			5.04	6.58		11.49	12.61	0.16		1.34	3.06	0.8		0.97															17672
Atlantic	Canary Islands	Lanzarote / Basalt Series Iv	Georoc 2020	[866]	29.4	29.4	-13.41	-13.41	s_14.217ILM	Basalt, Olivine		VOLCANIC ROCK	WR [866]	43.25	2.39		12.63			3.25	7.93		11.86	11.43	0.16		1.4	3.38	0.86		1.03															17673
Atlantic	Canary Islands	Lanzarote / Basalt Series Iv	Georoc 2020	[866]	29.26	29.26	-13.37	-13.37	s_14.222ILM	Basalt, Olivine-Augite		VOLCANIC ROCK	WR [866]	44.3	2.27		14			2.31	8.55		11.72	10.47	0.15		1.26	3.68	0.89		0.21															17674
Atlantic	Canary Islands	Lanzarote / Basalt Series Iv	Georoc 2020	[866]	29	29	-13.6	-13.6	s_13.644ILM	Basalt, Olivine		VOLCANIC ROCK	WR [866]	49.3	2.06		13.43			1.02	9.23		9.39	11.39	0.15		0.74	2.48	0.36		0.17															17675
Atlantic	Canary Islands	Fuerteventura / Basalt Series Ii	Georoc 2020	[866]	28.42	28.42	-13.97	-13.97	s_16.302ILM	Oceanite		VOLCANIC ROCK	WR [866]	39.8	3.17		11.55			6.02	7.63		11.9	11.84	0.19		0.73	3.62	1.41		1.9			0.11												17676
Atlantic	Canary Islands	Fuerteventura / Basalt Series Ii	Georoc 2020	[866]	28.4	29	-14	-14	s_16.211ILM	Oceanite		VOLCANIC ROCK	WR [866]	39.85	4.12		11.95			7.17	6.73		11.76	9.72	0.17		1.06	3.22	1.03		2.87															17677
Atlantic	Canary Islands	Fuerteventura / Basalt Series Ii	Georoc 2020	[866]	28.42	28.42	-13.97	-13.97	s_16.242ILM	Oceanite		VOLCANIC ROCK	WR [866]	39.95	3.18		11.29			5.76	7.6		12.04	12.14	0.19		0.73	3.49	1.42		1.97															17678
Atlantic	Canary Islands	Fuerteventura / Basalt Series Ii	Georoc 2020	[866]	28.4	29	-14	-14	s_16.310ILM	Basalt, Olivine		VOLCANIC ROCK	WR [866]	41.1	3.01		11.63			6.21	7.06		10.59	12.58	0.16		1.14	2.51	0.81		3.05			0.05												17679
Atlantic	Canary Islands	Fuerteventura / Basalt Series Ii	Georoc 2020	[866]	28.42	28.42	-13.97	-13.97	s_16.215ILM	Basalt, Olivine		VOLCANIC ROCK	WR [866]	43	3.1		12.35			7.18	6.07		11.76	10.09	0.16		1.3	3.16	0.75		0.63			0.52												17680
Atlantic	Canary Islands	Fuerteventura / Basalt Series Ii	Georoc 2020	[866]	28.42	28.42	-13.97	-13.97	s_16.222ILM	Basalt, Olivine		VOLCANIC ROCK	WR [866]	43.27	3.01		12.61			6.18	6.77		11.46	9.98	0.16		1.37	2.98	0.78		1.08			0.33												17681
Atlantic	Canary Islands	Fuerteventura / Basalt Series Ii	Georoc 2020	[866]	29	29	-14	-14	s_16.230ILM	Basalt, Olivine		VOLCANIC ROCK	WR [866]	43.45	2.94		12.13			4.84	7.69		12.52	9.83	0.15		1.3	2.4	0.74		1.98			0.33												17682
Atlantic	Canary Islands	Fuerteventura / La Ventosilla / Basalt Series Ii	Georoc 2020	[866]	29	29	-14	-14	s_16.630ILM	Basalt, Olivine		VOLCANIC ROCK	WR [866]	44.35	2.41		13.58			5.19	6.51		10.4	9.35	0.14		1.22	2.8	0.5		3.01			0.26												17683
Atlantic	Canary Islands	Fuerteventura / Basalt Series Ii	Georoc 2020	[866]	28.42	28.42	-13.97	-13.97	s_16.136ILM	Basalt, Olivine		VOLCANIC ROCK	WR [866]	44.75	2.96		13.01			2.69	10.27		10.08	11.21	0.15		0.52	2.83	0.37		1.04															17684
Atlantic	Canary Islands	Fuerteventura / Basalt Series Iii	Georoc 2020	[866]	28.42	28.42	-14	-14	s_14.424ILM	Oceanite		VOLCANIC ROCK	WR [866]	38.4	3.23		11.94			4.16	8.18		14.44	9.21	0.18		0.64	3.46	1.32		3.06			1.52												17685
Atlantic	Canary Islands	Fuerteventura / Basalt Series Iii	Georoc 2020	[866]	29	29	-14	-14	s_16.776ILM	Basalt, Olivine		VOLCANIC ROCK	WR [866]	41.5	2.23		11.97			7.69	5.1		12.2	11.85	0.15		1.3	2.92	0.77		1.13			1.32												17686
Atlantic	Canary Islands	Fuerteventura / Basalt Series Iii	Georoc 2020	[866]	29	29	-14	-14	s_18.003ILM	Oceanite		VOLCANIC ROCK	WR [866]	42.25	2.46		12.57			6.32	5.75		11.27	12.22	0.16		1.46	2.88	0.84		0.82			0.8												17687
Atlantic	Canary Islands	Fuerteventura / Basalt Series Iii	Georoc 2020	[866]	28.61	28.61	-13.88	-13.88	s_16.869ILM	Basalt, Olivine		VOLCANIC ROCK	WR [866]	42.5	2.78		11.98			6.48	6.81		11.36	11.49	0.15		1.5	3.03	0.74		0.98															17688
Atlantic	Canary Islands	Fuerteventura / Basalt Series Iii	Georoc 2020	[866]	28.61	28.61	-13.88	-13.88	s_16.631ILM	Basalt, Olivine-Augite		VOLCANIC ROCK	WR [866]	42.5	2.93		12.07			8	5.67		10.92	11.24	0.17		1.55	3.1	0.73		1.03			0.24												17689
Atlantic	Canary Islands	Fuerteventura / Basalt Series Iii	Georoc 2020	[866]	29	29	-14	-14	s_16.444ILM	Oceanite		VOLCANIC ROCK	WR [866]	42.5	2.54		12.41			5.78	6.37		11.03	12.41	0.15		1.34	2.99	0.78		1.54															17690
Atlantic	Canary Islands	Fuerteventura / Basalt Series Iii	Georoc 2020	[866]	28.61	28.61	-13.88	-13.88	s_18.158ILM	Basalt, Olivine		VOLCANIC ROCK	WR [866]	42.6	3.08		12.12			5.44	6.63		10.88	12.09	0.15		1.5	3.03	0.8		0.91			0.2												17691
Atlantic	Canary Islands	Fuerteventura / Basalt Series Iii	Georoc 2020	[866]	28.61	28.61	-13.88	-13.88	s_16.861ILM	Basalt, Olivine		VOLCANIC ROCK	WR [866]	42.65	2.07		11.99			3.65	8.22		12.11	12.22	0.16		1.14	3.04	0.71		0.92			0.9												17692
Atlantic	Canary Islands	Fuerteventura / Basalt Series Iii	Georoc 2020	[866]	28.61	28.61	-13.88	-13.88	s_17.352ILM	Oceanite		VOLCANIC ROCK	WR [866]	42.95	2.33		12.19			4.54	7.35		11.16	12.5	0.17		1.1	2.74	0.76		1.57			0.2												17693
[truncated: 31,944 more rows]

## Sheet: Table S7
Table S7. Evidence of porphyritic (cumulative) samples in OIB systems. References (column C) are provided below the table.
[truncated: 36 more rows]

## Sheet: Table S8
Table S8. Input parameters (temperature, pressure, crystallinity, melt composition, water content) and output density and effective viscosity values from Ken Wohletz's “Magma” program (http://www.lanl.gov/orgs/ees/geodynamics/Wohletz/KWare/Index.htm). We considered the Hawaiian alkaline primary melt and associated R-MELTS fractionated melts at ca. 7 and 5 wt.% MgO, as well as R-MELTS fractionated…
[truncated: 13 more rows]
